# Supplementary material
Source: PubMed Central journal article supplement (PMC3253940)
Supplement: NIHMS336623-supplement-1_si_001.pdf [file NIHMS336623-supplement-1_si_001.pdf]

# Supporting Information

For

## Libraries of 2,3,4,7,11*b*-hexahydro-1*H*-pyrido[2,1-*a*]isoquinolin-2-amine Derivatives via a Multicomponent Assembly Process/1,3-Dipolar Cycloaddition Strategy

Brett A. Granger, Kyosuke Kaneda, and Stephen F. Martin\*

*Department of Chemistry and Biochemistry and  
The Texas Institute for Drug and Diagnostic Development*

*The University of Texas at Austin, Austin, Texas 78712*

[sfmartin@mail.utexas.edu](mailto:sfmartin@mail.utexas.edu)

### Table of Contents:

|                                                           |          |
|-----------------------------------------------------------|----------|
| General Experimental Methods                              | S2-S3    |
| Experimental Procedures and Characterization              | S3-S41   |
| Lipinski's Rule Data                                      | S41-S43  |
| <sup>1</sup> H NMR, <sup>13</sup> C NMR, and LCMS Spectra | S44-S167 |
| References                                                | S168     |

**General Methods.** Methanol (MeOH) and acetonitrile (CH<sub>3</sub>CN) were dried by filtration through two columns of activated molecular sieves. Tetrahydrofuran (THF) and toluene were passed through two columns of activated neutral alumina prior to use. Triethylamine (Et<sub>3</sub>N), dichloromethane (CH<sub>2</sub>Cl<sub>2</sub>), 1,2-dichloroethane (DCE), morpholine, *N*-methylpiperazine, *trans*-crotonoyl chloride, and boron trifluoride diethyl etherate (BF<sub>3</sub>·OEt<sub>2</sub>) were freshly distilled over CaH<sub>2</sub>. Trimethylsilyl trifluoromethanesulfonate (TMSOTf) was distilled over P<sub>2</sub>O<sub>5</sub>. All solvents used for palladium-catalyzed cross-coupling reactions were degassed by sparging with nitrogen for 20 min prior to use. All other reagents and solvents were reagent grade and were purchased and used as received unless otherwise noted. Reactions were performed under a nitrogen or argon atmosphere in round-bottom flasks sealed under rubber septa with magnetic stirring, unless otherwise noted. Water sensitive reactions were performed with flame- or oven-dried glassware, stir-bars and steel needles. Reaction temperatures are reported as the temperatures of the bath surrounding the vessel. Sensitive reagents and solvents were transferred using plastic or oven-dried glass syringes and steel needles using standard techniques.

Proton nuclear magnetic resonance (<sup>1</sup>H NMR) and carbon nuclear magnetic resonance (<sup>13</sup>C NMR) spectra were acquired in CDCl<sub>3</sub> unless otherwise noted. Chemical shifts are reported in parts per million (ppm, δ), downfield from tetramethylsilane (TMS, δ = 0.00 ppm) and are referenced to residual solvent (CDCl<sub>3</sub>, δ = 7.26 ppm (<sup>1</sup>H) and 77.16 ppm (<sup>13</sup>C)). Coupling constants (*J*) are reported in hertz (Hz) and the resonance multiplicity abbreviations used are: s, singlet; d, doublet; t, triplet; dt, doublet of triplets; td, triplet of doublets; dd, doublet of doublets; ddd, doublet of doublet of doublets; dddd, doublet of doublet of doublet of doublets; m, multiplet; comp, overlapping multiplets of magnetically non-equivalent protons. The abbreviations br and app stand for broad and apparent, respectively. Infrared (IR) spectra were obtained with a Thermo Scientific Nicolet IR-100 FT-IR series spectrometer as thin films on sodium chloride plates. Melting points were determined using a Thomas-Hoover Uni-melt capillary melting point apparatus. Purity was determined using an LCMS system comprised of an Agilent 1200 Series HPLC and an Agilent 6130 single quadrupole mass spectrometer. Samples were injected onto a Phenomenex Gemini C18 column (5 micron, 2.1 x 50 mm) and eluted at 0.7 mL/min using a gradient of 10-90% acetonitrile, 0.1% formic acid (11 minute linear ramp). Positive mode electrospray ionization was used to verify the identity of the major component, and a UV chromatogram recorded at 214 nm was integrated to determine compound

purity. Thin-layer chromatography (TLC) was performed on EMD 60 F<sub>254</sub> glass-backed pre-coated silica gel plates and were visualized using one or more of the following methods: UV light (254 nm) and staining with basic potassium permanganate (KMnO<sub>4</sub>) or acidic *p*-anisaldehyde (PAA). Flash chromatography was performed using glass columns and with Silicycle SiliaFlash F60 (40-63 μm) silica gel eluting with the solvents indicated according to the procedure of Still,<sup>1</sup> unless otherwise noted.

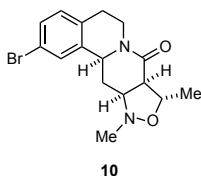

**2-Bromo-8,10-dimethyl-5,6,7a,8,10,10a,11,11a-octahydro-9-oxa-6a,10-diazacyclopenta[b]phenanthren-7-one (10).** *trans*-Crotonoyl chloride (548 mg, 0.5 mL, 5.24 mmol) was added to a solution of imine **7** (1.0 g, 4.76 mmol) and silyl enol ether **8**<sup>2</sup> (0.90 g, 1.1 mL, 5.71 mmol) in CH<sub>3</sub>CN (95 mL) at room temperature. Freshly distilled TMSOTf (106 mg, 86 μL, 0.47 mmol) was added, and the reaction was stirred for 0.5 h at room temperature. The mixture was then partitioned between saturated aqueous NaHCO<sub>3</sub> (200 mL) and CH<sub>2</sub>Cl<sub>2</sub> (200 mL). The layers were separated, and the aqueous layer was extracted with CH<sub>2</sub>Cl<sub>2</sub> (2 × 100 mL). The combined organic layers were dried (Na<sub>2</sub>SO<sub>4</sub>) and concentrated under reduced pressure. The crude amide **3** thus obtained (pale yellow oil) was dissolved in toluene (80 mL) containing *N*-methylhydroxylamine hydrochloride (0.44 g, 5.24 mmol) and Et<sub>3</sub>N (577 mg, 0.8 mL, 5.71 mmol), and the mixture was heated at 50 °C for 4 h. The reaction was partitioned between toluene (20 mL) and H<sub>2</sub>O (100 mL), and the layers were separated. The aqueous layer was extracted with toluene (2 × 50 mL), and the combined organic layers were dried (Na<sub>2</sub>SO<sub>4</sub>) and concentrated under reduced pressure. The resultant yellow solid was recrystallized from MeOH to give 1.1 g (66% over 2 steps) of isoxazolidine **10** as small colorless crystals: mp 190.5-192 °C; <sup>1</sup>H NMR (600 MHz) δ 7.34-7.32 (comp, 2 H), 7.05 (d, *J* = 7.8 Hz, 1 H), 4.82-4.77 (m, 1 H), 4.64 (dd, *J* = 12.0, 1.8 Hz, 1 H), 4.33-4.29 (m, 1 H), 3.22-3.14 (m, 1 H), 2.86-2.72 (comp, 4 H), 2.70 (s, 3 H), 2.36 (ddd, *J* = 13.2, 7.2, 2.4 Hz, 1 H), 1.65-1.59 (m, 1 H), 1.52 (d, *J* = 6.0 Hz, 3 H); <sup>13</sup>C NMR (150 MHz) δ 169.3, 137.8, 134.3, 130.5, 130.0, 129.1, 120.3, 76.4, 65.0, 53.7, 53.4, 44.0, 38.5, 36.7, 28.8, 20.0; IR (neat) 2966, 2839, 1641, 1432 cm<sup>-1</sup>; mass spectrum (CI) *m/z* 351.0706 [C<sub>16</sub>H<sub>20</sub><sup>79</sup>BrN<sub>2</sub>O<sub>2</sub> (M+1) requires 351.0708];<sup>3</sup> LCMS purity: 98%.

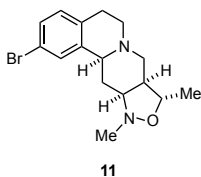

**2-Bromo-8,10-dimethyl-5,6,7a,8,10,10a,11,11a-octahydro-7H-9-oxa-6a,10-diazacyclopenta[b]phenanthrene (11).** To a suspension of NaBH<sub>4</sub> (57 mg, 1.5 mmol) in anhydrous THF (3 mL) at 0 °C was added BF<sub>3</sub>·OEt<sub>2</sub> (0.25 g, 0.22 mL, 1.8 mmol), and the mixture was stirred at 0 °C for 20 min. A solution of lactam **10** (100 mg, 0.30 mmol) in anhydrous THF (7 mL) was added slowly at 0 °C, and the mixture was warmed to room temperature and stirred for 24 h. A solution of 5 M aqueous HCl (5 mL) was added, and the mixture was heated at 70 °C for 2 h and then cooled to 0 °C. The acidic solution was made basic (pH > 10) with 5 M aqueous NaOH (~7 mL) at 0 °C, and then partitioned with CH<sub>2</sub>Cl<sub>2</sub> (10 mL). The layers were separated, and the aqueous layer was extracted with CH<sub>2</sub>Cl<sub>2</sub> (2 × 10 mL). The combined organic layers were dried (Na<sub>2</sub>SO<sub>4</sub>), filtered, and concentrated under reduced pressure. The resultant yellow oil was purified by flash column chromatography eluting with hexanes/EtOAc (1 : 9) to give 79 mg (82%) of **11** as a colorless solid: mp 140.5-141 °C; <sup>1</sup>H NMR (600 MHz) δ 7.31 (d, *J* = 1.8 Hz, 1 H), 7.24 (dd, *J* = 7.8, 1.8 Hz, 1 H), 6.95 (d, *J* = 7.8 Hz, 1 H), 4.31-4.27 (m, 1 H), 3.28-3.18 (m, 1 H), 3.09 (d, *J* = 11.8 Hz, 1 H), 3.06-3.00 (m, 1 H), 2.97-2.96 (m, 1 H), 2.87 (ddd, *J* = 11.4, 5.7, 1.4 Hz, 1 H), 2.75 (s, 3 H), 2.63 (dd, *J* = 11.7, 4.2 Hz, 1 H), 2.63-2.58 (m, 1 H), 2.50-2.47 (m, 1 H), 2.43 (ddd, *J* = 12.0, 11.4, 3.5 Hz, 1 H), 2.43-2.34 (m, 1 H), 1.71-1.67 (m, 1 H), 1.37 (d, *J* = 3.6 Hz, 3 H); <sup>13</sup>C NMR (150 MHz) δ 139.8, 133.7, 130.4, 129.1, 128.3, 119.6, 77.0, 65.8, 60.2, 54.1, 51.7, 47.4, 45.9, 35.0, 29.2, 21.3; IR (neat) 2920, 2757, 1114, 908, 731 cm<sup>-1</sup>; mass spectrum (ESI) *m/z* 337.0910 [C<sub>16</sub>H<sub>22</sub><sup>79</sup>BrN<sub>2</sub>O (M+1) requires 337.0916]; LCMS purity: 100%.

**Representative procedure for the formation of 13{1-3} via Suzuki cross-coupling:**

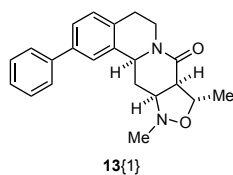

**8,10-Dimethyl-2-phenyl-5,6,7a,8,10,10a,11,11a-octahydro-9-oxa-6a,10-diazacyclopenta[b]phenanthren-7-one (13{1}).** A mixture of isoxazolidine **10** (1.0 g, 2.9 mmol), cesium carbonate (1.9 g, 5.7 mmol), phenylboronic acid (**12{1}**) (0.7 g, 5.7 mmol), and bis(tri-



tert-butylphosphine)palladium(0) (15 mg, 0.03 mmol) in degassed 1,4-dioxane (14 mL) was heated at 90 °C for 3 h. The reaction was cooled to room temperature, filtered through a pad of celite, and the filtrate was concentrated under reduced pressure. The resultant yellow oil was purified by flash column chromatography eluting with hexanes/EtOAc (1 : 2) to give 0.99 g (99%) of **13**{1} as a fluffy colorless solid: mp 183-183.5 °C (colorless needles from 1 : 1 EtOH : H<sub>2</sub>O); <sup>1</sup>H NMR (600 MHz) δ 7.57-7.55 (comp, 2 H), 7.46-7.43 (comp, 3 H), 7.37-7.34 (m, 1 H), 7.37 (d, *J* = 1.2 Hz, 1 H), 7.24 (d, *J* = 7.8 Hz, 1 H), 4.87-4.82 (m, 1 H), 4.75 (dd, *J* = 12.0, 2.4 Hz, 1 H), 4.37-4.32 (m, 1 H), 3.25-3.16 (m, 1 H), 2.94-2.80 (comp, 4 H), 2.70 (s, 3 H), 2.44 (ddd, *J* = 13.2, 7.2, 2.4 Hz, 1 H), 1.71-1.65 (m, 1 H), 1.53 (d, *J* = 6.6 Hz, 3 H); <sup>13</sup>C NMR (150 MHz) δ 169.4, 140.6, 140.1, 136.0, 134.4, 129.3, 128.9, 127.5, 127.0, 125.8, 124.9, 76.4, 65.2, 54.2, 53.5, 44.0, 38.7, 37.0, 29.0, 20.1; IR (neat) 3485, 1645, 1427 cm<sup>-1</sup>; mass spectrum (CI) *m/z* 349.1911 [C<sub>22</sub>H<sub>25</sub>N<sub>2</sub>O<sub>2</sub> (M+1) requires 349.1916]; LCMS purity: 97%.

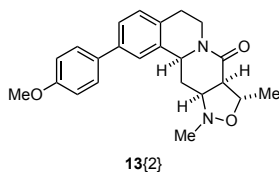

**2-(4-Methoxy-phenyl)-8,10-dimethyl-5,6,7a,8,10,10a,11,11a-octahydro-9-oxa-6a,10-diaza-cyclopenta[b]phenanthren-7-one (13{2})**. Prepared according to the representative procedure for the formation of **13**{1-3} via Suzuki cross-coupling. Purification: hexanes/EtOAc (35 : 65 → 0 : 100). Yield: 94% (0.30 g colorless solid). Data: mp 160-160.5 °C (colorless needles from 1 : 1 EtOH : H<sub>2</sub>O); <sup>1</sup>H NMR (600 MHz) δ 7.49 (d, *J* = 9.0 Hz, 2 H), 7.40 (dd, *J* = 7.8, 1.8 Hz, 1 H), 7.32 (d, *J* = 1.8 Hz, 1 H), 7.22 (d, *J* = 7.8 Hz, 1 H), 6.98 (d, *J* = 9.0 Hz, 2 H), 4.83 (dd, *J* = 8.4, 2.4 Hz, 1 H), 4.74 (dd, *J* = 12.0, 1.8 Hz, 1 H), 4.36-4.32 (m, 1 H), 3.86 (s, 3 H), 3.24-3.16 (m, 1 H), 2.93-2.78 (comp, 4 H), 2.70 (s, 3 H), 2.44 (ddd, *J* = 13.2, 7.2, 2.4 Hz, 1 H), 1.71-1.64 (m, 1 H), 1.53 (d, *J* = 6.0 Hz, 3 H); <sup>13</sup>C NMR (150 MHz) δ 169.4, 159.3, 139.7, 135.9, 133.7, 133.1, 129.3, 128.0, 125.4, 124.4, 114.3, 76.4, 65.2, 55.4, 54.3, 53.5, 44.0, 38.7, 37.0, 28.9, 20.1; IR (neat) 1643, 1495, 1425, 1247 cm<sup>-1</sup>; mass spectrum (CI) *m/z* 379.2019 [C<sub>23</sub>H<sub>27</sub>N<sub>2</sub>O<sub>3</sub> (M+1) requires 379.2022]; LCMS purity: 97%.

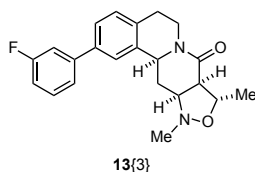

**2-(3-Fluoro-phenyl)-8,10-dimethyl-5,6,7a,8,10,10a,11,11a-octahydro-9-oxa-6a,10-diaza-cyclopenta[*b*]phenanthren-7-one (13{3})**. Prepared according to the representative procedure for the formation of **13{1-3}** via Suzuki cross-coupling. Purification: hexanes/EtOAc (35 : 65). Yield: Quantitative (51 mg colorless solid). Data: mp 140-141 °C (colorless needles from 1 : 1 EtOH : H<sub>2</sub>O); <sup>1</sup>H NMR (600 MHz) δ 7.43-7.38 (comp, 2 H), 7.36-7.33 (comp, 2 H), 7.27-7.24 (comp, 2 H), 7.05 (dddd, *J* = 8.4, 8.4, 2.4, 0.6 Hz, 1 H), 4.88-4.82 (m, 1 H), 4.75 (dd, *J* = 11.4, 1.2 Hz, 1 H), 4.36-4.32 (m, 1 H), 3.26-3.16 (m, 1 H), 2.94-2.81 (comp, 4 H), 2.71 (s, 3 H), 2.44 (ddd, *J* = 13.2, 7.2, 2.4 Hz, 1 H), 1.71-1.65 (m, 1 H), 1.53 (d, *J* = 6.0 Hz, 3 H); <sup>13</sup>C NMR (150 MHz) δ 169.4, 163.2 (*J*<sub>C-F</sub> = 244.8 Hz), 142.8 (*J*<sub>C-F</sub> = 7.5 Hz), 138.7 (*J*<sub>C-F</sub> = 2.3 Hz), 136.2, 135.0, 130.3 (*J*<sub>C-F</sub> = 8.3 Hz), 129.5, 125.7, 124.8, 122.6 (*J*<sub>C-F</sub> = 2.9 Hz), 114.3 (*J*<sub>C-F</sub> = 21.3 Hz), 113.9 (*J*<sub>C-F</sub> = 21.8 Hz), 76.4, 65.2, 54.2, 53.5, 44.0, 38.6, 37.0, 29.0, 20.1; IR (neat) 3467, 1645, 1427 cm<sup>-1</sup>; mass spectrum (CI) *m/z* 367.1819 [C<sub>22</sub>H<sub>24</sub>FN<sub>2</sub>O<sub>2</sub> (M+1) requires 367.1822]; LCMS purity: 98%.

**Representative procedure for the formation of 13{4-5} via Buchwald-Hartwig amination:**

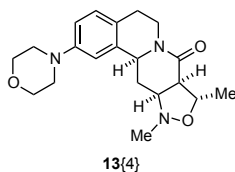

**8,10-Dimethyl-2-morpholin-4-yl-5,6,7a,8,10,10a,11,11a-octahydro-9-oxa-6a,10-diaza-cyclopenta[*b*]phenanthren-7-one (13{4})**. A mixture of Pd(OAc)<sub>2</sub> (9.7 mg, 0.04 mmol) and biphenyl-2-yl-di-*tert*-butylphosphine (12.8 mg, 0.04 mmol) in anhydrous toluene (0.5 mL) was stirred for 5 min at room temperature. The catalyst mixture was added to a solution of **10** (0.3 g, 0.85 mmol), morpholine (**12{4}**) (90 μL, 1.03 mmol), and NaO*t*-Bu (0.12 g, 1.11 mmol) in anhydrous toluene (1.4 mL), and the reaction was heated at 100 °C for 3 h. The reaction mixture was then cooled to room temperature, filtered through a pad of celite, and the filtrate was concentrated under reduced pressure. The resultant yellow oil was purified by flash column chromatography eluting with EtOAc/MeOH (95 : 5) to give 0.31 g (Quantitative) of **13{4}** as a

yellow solid: mp 63-64 °C (yellow crystals from 1 : 1 EtOH : H<sub>2</sub>O); <sup>1</sup>H NMR (500 MHz) δ 7.08 (d, *J* = 8.5 Hz, 1 H), 6.81 (dd, *J* = 8.5, 2.5 Hz, 1 H), 6.67 (d, *J* = 2.5 Hz, 1 H), 4.81-4.79 (m, 1 H), 4.63 (dd, *J* = 12.0, 2.0 Hz, 1 H), 4.35-4.32 (m, 1 H), 3.87-3.85 (comp, 4 H), 3.19-3.10 (comp, 5 H), 2.89-2.73 (comp, 3 H), 2.71-2.67 (comp, 4 H), 2.36 (ddd, *J* = 13.5, 7.5, 2.5 Hz, 1 H), 1.66-1.59 (m, 1 H), 1.52 (d, *J* = 6.5 Hz, 3 H); <sup>13</sup>C NMR (125 MHz) δ 169.3, 150.3, 136.2, 129.6, 126.9, 115.0, 113.1, 76.5, 66.9, 65.1, 54.4, 53.4, 49.6, 44.0, 38.9, 37.1, 28.3, 20.1; IR (neat) 2961, 2923, 2853, 1645, 1512, 1422, 1242, 1121 cm<sup>-1</sup>; mass spectrum (CI) *m/z* 358.2133 [C<sub>20</sub>H<sub>28</sub>N<sub>3</sub>O<sub>3</sub> (M+1) requires 358.2131]; LCMS purity: 97%.

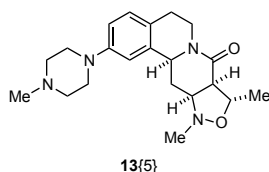

**8,10-Dimethyl-2-(4-methyl-piperazin-1-yl)-5,6,7a,8,10,10a,11,11a-octahydro-9-oxa-6a,10-diaza-cyclopenta[*b*]phenanthren-7-one (13{5}).** Prepared according to the representative procedure for the formation of 13{4-5} via Buchwald-Hartwig amination. Purification: EtOAc/MeOH (100 : 0 → 70 : 30 → 65 : 35) with 1% Et<sub>3</sub>N. Yield: 88% (0.93 g yellow solid). Data: mp 139-140 °C (yellow needles from 1 : 1 EtOH : H<sub>2</sub>O); <sup>1</sup>H NMR (600 MHz) δ 7.06 (d, *J* = 8.4 Hz, 1H), 6.82 (dd, *J* = 8.4, 2.4 Hz, 1 H), 6.68 (d, *J* = 2.4 Hz, 1 H), 4.80-4.77 (m, 1 H), 4.63 (dd, *J* = 12.0, 1.2 Hz, 1 H), 4.35-4.30 (m, 1 H), 3.21-3.18 (comp, 5 H), 2.84-2.75 (comp, 3 H), 2.70-2.66 (m, 1 H), 2.70 (s, 3 H), 2.59-2.57 (comp, 4 H), 2.38-2.31 (m, 1 H), 2.36 (s, 3 H), 1.65-1.59 (m, 1 H), 1.52 (d, *J* = 6.6 Hz, 3 H); <sup>13</sup>C NMR (150 MHz) δ 169.3, 150.3, 136.1, 129.5, 126.5, 115.3, 113.4, 76.5, 65.2, 55.1, 54.4, 53.5, 49.4, 46.1, 44.1, 38.9, 37.0, 28.3, 20.2; IR (neat) 3480, 1642, 1511, 1424, 1289, 1245 cm<sup>-1</sup>; mass spectrum (CI) *m/z* 371.2449 [C<sub>21</sub>H<sub>31</sub>N<sub>4</sub>O<sub>2</sub> (M+1) requires 371.2447]; LCMS purity: 100%.

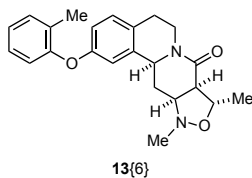

**8,10-Dimethyl-2-*o*-tolyl-5,6,7a,8,10,10a,11,11a-octahydro-9-oxa-6a,10-diaza-cyclopenta[*b*]phenanthren-7-one (13{6}).** A mixture of Pd(OAc)<sub>2</sub> (31 mg, 0.14 mmol) and biphenyl-2-yl-di-*tert*-butylphosphine (42 mg, 0.14 mmol) in anhydrous toluene (0.5 mL) was stirred for 5 min at room temperature. The catalyst mixture was added to a solution of 10 (1.0 g,

2.9 mmol), *o*-cresol (**12**{6}) (0.37 g, 0.35 mL, 3.4 mmol), and K<sub>3</sub>PO<sub>4</sub> (1.2 g, 5.7 mmol) in anhydrous toluene (9.5 mL), and the reaction was heated at 100 °C for 17 h. The reaction mixture was then cooled to room temperature, filtered through a pad of celite, and the filtrate was concentrated under reduced pressure. The resultant yellow oil was purified by flash column chromatography eluting with hexanes/EtOAc (45 : 55 → 35 : 65) to give 0.62 g (57%) of **13**{6} as a cream colored solid: mp 159-160 °C (colorless crystals from 1 : 1 EtOH : H<sub>2</sub>O); <sup>1</sup>H NMR (500 MHz) δ 7.26 (dd, *J* = 7.5, 1.0 Hz, 1 H), 7.17 (ddd, *J* = 7.5, 7.5, 1.0 Hz, 1 H), 7.09-7.06 (comp, 2 H), 6.88 (dd, *J* = 8.0, 0.5 Hz, 1 H), 6.77-6.73 (comp, 2 H), 4.83-4.76 (m, 1 H), 4.60 (dd, *J* = 12.0, 2.0 Hz, 1 H), 4.34-4.28 (m, 1 H), 3.20-3.11 (m, 1 H), 2.89-2.69 (comp, 4 H), 2.68 (s, 3 H), 2.30 (ddd, *J* = 13.0, 7.0, 2.5 Hz, 1 H), 2.25 (s, 3 H), 1.66-1.59 (m, 1 H), 1.52 (d, *J* = 6.0 Hz, 3 H); <sup>13</sup>C NMR (125 MHz) δ 169.3, 156.6, 154.4, 137.0, 131.6, 130.1, 129.8, 129.2, 127.2, 124.1, 119.4, 116.2, 114.8, 76.5, 65.0, 54.1, 53.4, 44.2, 38.9, 36.6, 28.5, 20.2, 16.2; IR (neat) 3436, 1646, 1489, 1422, 1248 cm<sup>-1</sup>; mass spectrum (CI) *m/z* 379.2021 [C<sub>23</sub>H<sub>27</sub>N<sub>2</sub>O<sub>3</sub> (M+1) requires 379.2022] LCMS purity: 95%.

**Representative procedure for the formation of **14**{1-6} via *N,O*-bond cleavage:**

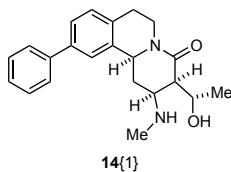

**3-(1-Hydroxyethyl)-2-(methylamino)-10-phenyl-2,3,6,7-tetrahydro-1H-pyrido[2,1-*a*]isoquinolin-4(11*b*H)-one (**14**{1}).** A mixture of isoxazolidine **13**{1} (1.0 g, 2.9 mmol) in anhydrous MeOH (57 mL) was added NiCl<sub>2</sub>·6H<sub>2</sub>O (1.3 g, 5.7 mmol), followed by NaBH<sub>4</sub> (0.64 g, 16.8 mmol). The black mixture was stirred for 3 h at room temperature, and the solvent was evaporated under reduced pressure. The resultant black residue was partitioned between CH<sub>2</sub>Cl<sub>2</sub> (50 mL) and concentrated NH<sub>4</sub>OH (50 mL). The biphasic mixture was stirred for 3 h at room temperature, and the layers were separated. The aqueous layer was extracted with CH<sub>2</sub>Cl<sub>2</sub> (2 × 5 mL), and the combined organic layers were dried (Na<sub>2</sub>SO<sub>4</sub>), filtered, and concentrated under reduced pressure. The resultant yellow gum was purified by flash column chromatography on Florisil<sup>®</sup> gel (Fisherbrand, 60-100 mesh) eluting with EtOAc/MeOH (7 : 3) with 1% Et<sub>3</sub>N to give 0.88 g (87%) of **14**{1} as a yellow solid: mp 161-163 °C; <sup>1</sup>H NMR (500 MHz) δ 7.55-7.52 (comp, 2 H), 7.45-7.41 (comp, 3 H), 7.37-7.32 (comp, 2 H), 7.21 (d, *J* = 7.5 Hz, 1 H), 4.81-4.70

(comp, 2 H), 4.29-4.24 (m, 1 H), 3.37-3.34 (m, 1 H), 2.97-2.88 (comp, 2 H), 2.82-2.75 (m, 1 H), 2.63 (dd,  $J = 7.0, 5.0$  Hz, 1 H), 2.60-2.55 (m, 1 H), 2.41 (s, 3 H), 2.12 (ddd,  $J = 13.5, 11.0, 9.5$  Hz, 1 H), 1.25 (d,  $J = 6.0$  Hz, 3 H);  $^{13}\text{C}$  NMR (125 MHz)  $\delta$  169.6, 140.7, 139.9, 137.0, 133.7, 129.4, 128.8, 127.4, 127.0, 125.8, 123.6, 66.9, 55.4, 54.6, 49.3, 39.6, 34.3, 33.9, 28.6, 21.4; IR (neat) 3314, 3053, 2926, 2850, 1637, 1486, 1434, 764, 735, 700  $\text{cm}^{-1}$ ; mass spectrum (CI)  $m/z$  351.2074 [ $\text{C}_{22}\text{H}_{27}\text{N}_2\text{O}_2$  (M+1) requires 351.2073]; LCMS purity: 95%.

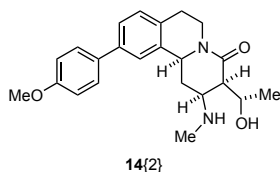

**3-(1-Hydroxyethyl)-10-(4-methoxyphenyl)-2-(methylamino)-2,3,6,7-tetrahydro-1H-pyrido[2,1-a]isoquinolin-4(11bH)-one (14{2}).** Prepared according to the representative procedure for the formation of **14{1-6}** via *N,O*-bond cleavage. Purification: EtOAc/MeOH (100 : 0  $\rightarrow$  70 : 30) with 1%  $\text{Et}_3\text{N}$ . Yield: 88% (221 mg yellow solid). Data:  $^1\text{H}$  NMR (400 MHz)  $\delta$  7.50-7.48 (comp, 2 H), 7.41 (d,  $J = 8.0, 1.6$  Hz, 1 H), 7.36-7.34 (m, 1 H), 7.22 (d,  $J = 8.0$  Hz, 1 H), 7.00-6.97 (comp, 2 H), 4.81-4.72 (comp, 2 H), 4.30 (ddd,  $J = 12.8, 6.4, 6.4$ , 1 H), 3.86 (s, 3 H), 3.89 (ddd,  $J = 9.6, 4.8, 4.8$  Hz, 1 H), 2.97-2.90 (comp, 2 H), 2.84-2.79 (m, 1 H), 2.65 (dd,  $J = 6.8, 4.4$  Hz, 1 H), 2.62-2.55 (m, 1 H), 2.43 (s, 3 H), 2.14 (ddd,  $J = 12.8, 10.8, 9.2$  Hz, 1 H), 1.27 (d,  $J = 6.4$  Hz, 3 H).

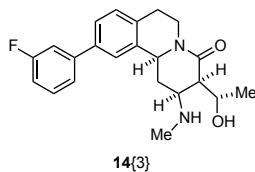

**10-(3-Fluorophenyl)-3-(1-hydroxyethyl)-2-(methylamino)-2,3,6,7-tetrahydro-1H-pyrido[2,1-a]isoquinolin-4(11bH)-one (14{3}).** Prepared according to the representative procedure for the formation of **14{1-6}** via *N,O*-bond cleavage. Purification: EtOAc/MeOH (100 : 0  $\rightarrow$  70 : 30). Yield: 83% (255 mg yellow solid). Data:  $^1\text{H}$  NMR (400 MHz)  $\delta$  7.44-7.32 (comp, 4 H), 7.27-7.24 (comp, 2 H), 7.06 (dddd,  $J = 8.4, 8.4, 2.4, 0.8$  Hz, 1 H), 4.83-4.73 (comp, 2 H), 4.29 (ddd,  $J = 12.8, 6.4, 6.4$  Hz, 1 H), 3.40 (ddd,  $J = 9.6, 4.8, 4.8$  Hz, 1 H), 2.98-2.93 (comp, 2 H), 2.85-2.81 (m, 1 H), 2.66 (dd,  $J = 6.8, 4.0$  Hz, 1 H), 2.63-2.55 (m, 1 H), 2.44 (s, 3 H), 2.14 (ddd,  $J = 13.2, 10.8, 9.2$  Hz, 1 H), 1.24 (d,  $J = 6.4$  Hz, 3 H).

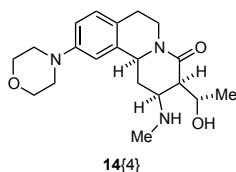

**3-(1-Hydroxyethyl)-2-(methylamino)-10-morpholino-2,3,6,7-tetrahydro-1H-pyrido[2,1-a]isoquinolin-4(11bH)-one (14{4})**. Prepared according to the representative procedure for the formation of **14{1-6}** via *N,O*-bond cleavage. Purification: EtOAc/MeOH (100 : 0 → 80 : 20). Yield: 81% (204 mg yellow solid). Data: <sup>1</sup>H NMR (400 MHz) δ 7.08 (d, *J* = 8.4 Hz, 1 H), 6.82 (dd, *J* = 8.4, 2.4 Hz, 1 H), 6.71 (d, *J* = 2.4 Hz, 1 H), 4.78-4.74 (m, 1 H), 4.64 (dd, *J* = 10.8, 6.0 Hz, 1 H), 4.32-4.25 (m, 1 H), 3.88-3.85 (comp, 4 H), 3.40-3.35 (m, 1 H), 3.19-3.13 (comp, 4 H), 2.88-2.80 (comp, 2 H), 2.72-2.68 (m, 1 H), 2.63 (dd, *J* = 6.4, 4.4 Hz, 1 H), 2.53-2.47 (m, 1 H), 2.43 (s, 3 H), 2.06 (ddd, *J* = 12.8, 10.8, 9.2 Hz, 1 H), 1.26 (d, *J* = 6.4 Hz, 3 H).

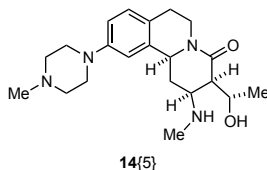

**3-(1-Hydroxyethyl)-2-(methylamino)-10-(4-methylpiperazin-1-yl)-2,3,6,7-tetrahydro-1H-pyrido[2,1-a]isoquinolin-4(11bH)-one (14{5})**. Prepared according to the representative procedure for the formation of **14{1-6}** via *N,O*-bond cleavage. Purification: EtOAc/MeOH (60 : 40) with 1% Et<sub>3</sub>N. Yield: 90% (1.0 g yellow gum). Data: <sup>1</sup>H NMR (500 MHz) δ 7.00 (d, *J* = 8.5 Hz, 1 H), 6.77 (dd, *J* = 8.5, 2.0 Hz, 1 H), 6.67 (d, *J* = 2.0 Hz, 1 H), 4.71-4.65 (m, 1 H), 4.58 (dd, *J* = 10.5, 5.5 Hz, 1 H), 4.24-4.20 (m, 1 H), 3.34-3.29 (m, 1 H), 3.14-3.12 (comp, 4 H), 2.84-2.73 (comp, 2 H), 2.67-2.62 (m, 1 H), 2.57 (dd, *J* = 6.5, 5.0 Hz, 1 H), 2.54-2.52 (comp, 4 H), 2.47-2.44 (m, 1 H), 2.37 (s, 3 H), 2.30 (s, 3 H), 2.01 (ddd, *J* = 13.5, 11.0, 9.5 Hz, 1 H), 1.21 (d, *J* = 6.5 Hz, 3 H); <sup>13</sup>C NMR (125 MHz) δ 169.6, 150.1, 137.0, 129.5, 125.8, 115.3, 112.4, 66.8, 55.3, 55.0, 54.6, 49.3, 49.2, 46.0, 39.7, 34.6, 33.9, 28.0, 21.3; IR (neat) 3410, 2937, 2806, 1622, 1452, 1142, 1115, 1010, 793, 730 cm<sup>-1</sup>; mass spectrum (CI) *m/z* 373.2602 [C<sub>21</sub>H<sub>33</sub>N<sub>4</sub>O<sub>2</sub> (M+1) requires 373.2604]; LCMS purity: 96%.

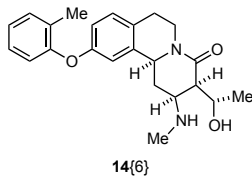

**3-(1-Hydroxyethyl)-2-(methylamino)-10-(*o*-tolxyloxy)-2,3,6,7-tetrahydro-1H-pyrido[2,1-*a*]isoquinolin-4(11*bH*)-one (14{6}).** Prepared according to the representative procedure for the formation of **14{1-6}** via *N,O*-bond cleavage. Purification: EtOAc/MeOH (70 : 30). Yield: 92% (0.7 g yellow solid). Data: mp 55-56 °C (dec.); <sup>1</sup>H NMR (500 MHz) δ 7.24-2.23 (m, 1 H), 7.16-7.13 (m, 1 H), 7.06-7.04 (comp, 2 H), 6.85 (d, *J* = 8.0 Hz, 1 H), 6.75 (d, *J* = 2.0 Hz, 1 H), 6.71 (dd, *J* = 8.0, 2.0 Hz, 1 H), 4.75-4.71 (m, 1 H), 4.60 (dd, *J* = 10.5, 6.0 Hz, 1 H), 4.27-4.22 (m, 1 H), 3.31 (ddd, *J* = 9.0, 4.0, 4.0 Hz, 1H), 2.88-2.79 (comp, 2 H), 2.74-2.67 (m, 1 H), 2.60 (dd, *J* = 7.0, 5.0 Hz, 1 H), 2.41-2.37 (comp, 4 H), 2.22 (s, 3 H), 2.07-2.00 (m, 1 H), 1.24 (d, *J* = 6.0 Hz, 3 H); <sup>13</sup>C NMR (125 MHz) δ 169.5, 156.5, 154.3, 137.9, 131.5, 130.1, 129.8, 128.5, 127.2, 124.0, 119.3, 116.1, 113.8, 67.0, 55.4, 54.6, 49.3, 39.7, 34.0, 33.9, 28.2, 21.5, 16.1; IR (neat) 3435, 2920, 2850, 1637, 1436, 1281, 1114, 757, 734 cm<sup>-1</sup>; mass spectrum (CI) *m/z* 381.2181 [C<sub>23</sub>H<sub>29</sub>N<sub>2</sub>O<sub>3</sub> (M+1) requires 381.2178].

**Representative procedure for the formation of amides:**

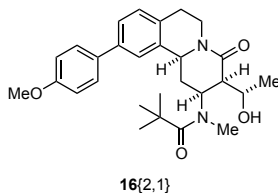

***N*-(3-(1-Hydroxyethyl)-10-(4-methoxyphenyl)-4-oxo-2,3,4,6,7,11*b*-hexahydro-1*H*-pyrido[2,1-*a*]isoquinolin-2-yl)-*N*-methylpivalamide (16{2,1}).** Pivaloyl chloride (**15{1}**) (11 mg, 11 μL, 0.09 mmol) was added to a solution of 1,3-amino alcohol **14{2}** (30 mg, 0.08 mmol) and triethylamine (9.6 mg, 13 μL, 0.10 mmol) in anhydrous CH<sub>2</sub>Cl<sub>2</sub> (0.40 mL) at 0 °C, and the solution was stirred for 45 min at 0 °C. Saturated NaHCO<sub>3</sub> (2 mL) and CH<sub>2</sub>Cl<sub>2</sub> (2 mL) were added and the layers were separated. The aqueous layer was extracted with CH<sub>2</sub>Cl<sub>2</sub> (2 × 2 mL), and the organic layer was dried (Na<sub>2</sub>SO<sub>4</sub>), filtered, and concentrated under reduced pressure. The resultant yellow oil was purified by flash column chromatography eluting with EtOAc to give 28 mg (76%) of **16{2,1}** as a cream colored solid: <sup>1</sup>H NMR (400 MHz) δ 7.49 (d, *J* = 8.8 Hz, 2 H), 7.42 (dd, *J* = 7.6, 1.6 Hz, 1 H), 7.32 (d, *J* = 1.6 Hz, 1 H), 7.25 (d, *J* = 7.6 Hz, 1 H), 6.99 (d, *J* =

8.8 Hz, 2 H), 5.67 (ddd,  $J = 10.0, 5.2, 5.2$  Hz, 1 H), 4.74-4.64 (comp, 2 H), 4.49-4.43 (m, 1 H), 3.99-3.96 (m, 1 H), 3.86 (s, 3 H), 3.13-3.06 (m, 1 H), 2.98 (s, 3 H), 2.90-2.88 (comp, 2 H), 2.97 (ddd,  $J = 14.8, 10.0, 4.4$  Hz, 1 H), 2.58-2.53 (m, 1 H), 1.73 (ddd,  $J = 14.4, 12.0, 5.2$  Hz, 1 H), 1.44 (dd,  $J = 6.4$  Hz, 3 H), 1.27 (s, 9 H); LCMS purity: 96%.

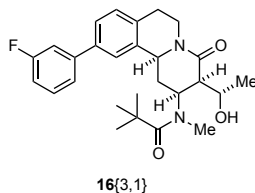

***N*-(10-(3-Fluorophenyl)-3-(1-hydroxyethyl)-4-oxo-2,3,4,6,7,11*b*-hexahydro-1*H*-pyrido[2,1-*a*]isoquinolin-2-yl)-*N*-methylpivalamide (16{3,1}).** Prepared according to the representative procedure for the formation of amides. Purification: EtOAc. Yield: 65% (40 mg colorless solid). Data: mp 203-204 °C (colorless crystals from 1 : 1 EtOH : H<sub>2</sub>O); <sup>1</sup>H NMR (600 MHz)  $\delta$  7.44 (dd,  $J = 7.8, 1.8$  Hz, 1 H), 7.41 (ddd,  $J = 7.8, 7.8, 6.0$  Hz, 1 H), 7.36 (d,  $J = 1.8$  Hz, 1 H), 7.33 (ddd,  $J = 7.8, 1.8, 1.2$  Hz, 1 H), 7.29 (d,  $J = 7.8$  Hz, 1H), 7.25 (ddd,  $J = 10.2, 2.4, 1.8$  Hz, 1 H), 7.08-7.04 (m, 1 H), 5.67 (ddd,  $J = 9.6, 6.0, 6.0$  Hz, 1 H), 4.73 (dd,  $J = 12.0, 4.2$  Hz, 1 H), 4.67 (ddd,  $J = 8.4, 8.4, 4.2$  Hz, 1 H), 4.40 (d,  $J = 2.4$  Hz, 1 H), 4.00-3.96 (m, 1 H), 3.11 (ddd,  $J = 13.2, 9.0, 6.0$  Hz, 1 H), 2.99 (s, 3 H), 2.93-2.91 (comp, 2 H), 2.70 (ddd,  $J = 15.0, 10.2, 4.8$  Hz, 1 H), 2.57-2.55 (m, 1 H), 1.73 (ddd,  $J = 15.0, 12.0, 6.0$  Hz, 1 H), 1.44 (d,  $J = 6.0$  Hz, 3 H), 1.27 (s, 9 H); <sup>13</sup>C NMR (150 MHz)  $\delta$  180.0, 171.6, 163.2 ( $J_{C-F} = 244.8$  Hz), 142.7 ( $J_{C-F} = 7.7$  Hz), 139.0 ( $J_{C-F} = 2.1$  Hz), 135.8, 134.7, 130.4 ( $J_{C-F} = 8.6$  Hz), 129.5, 126.0, 124.9, 122.6 ( $J_{C-F} = 2.9$  Hz), 114.4 ( $J_{C-F} = 21.2$  Hz), 113.9 ( $J_{C-F} = 21.7$  Hz), 64.7, 53.3, 51.3, 48.3, 39.5, 38.1, 36.6, 31.8, 29.0, 28.3, 21.2; IR (neat) 3377, 2970, 2244, 1649, 1613, 1481, 1406, 1093, 732 cm<sup>-1</sup>; mass spectrum (CI)  $m/z$  453.2549 [C<sub>27</sub>H<sub>34</sub>FN<sub>2</sub>O<sub>3</sub> (M+1) requires 453.2553]; LCMS purity: 96%.

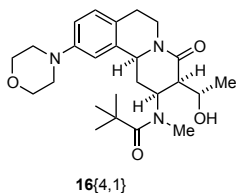

***N*-(3-(1-Hydroxyethyl)-10-morpholino-4-oxo-2,3,4,6,7,11*b*-hexahydro-1*H*-pyrido[2,1-*a*]isoquinolin-2-yl)-*N*-methylpivalamide (16{4,1}).** Prepared according to the representative procedure for the formation of amides. Purification: EtOAc/MeOH (100 : 0 → 90 : 10). Yield: 67% (20 mg yellow solid). Data: <sup>1</sup>H NMR (400 MHz)  $\delta$  7.11 (d,  $J = 8.8$  Hz, 1 H),



6.82 (dd,  $J = 8.8, 2.8$  Hz, 1 H), 6.66 (d,  $J = 2.8$  Hz, 1 H), 5.69-5.64 (m, 1 H), 4.66-4.58 (comp, 2 H), 4.46-4.40 (m, 1 H), 3.98-3.96 (m, 1 H), 3.88-3.86 (comp, 4 H), 3.14-3.12 (comp, 4 H), 3.04-2.96 (m, 1 H), 2.96 (s, 3 H), 2.79-2.78 (comp, 2 H), 2.62 (ddd,  $J = 14.0, 9.6, 4.0$  Hz, 1 H), 2.52-2.48 (m, 1 H), 1.66 (ddd,  $J = 14.4, 12.0, 5.2$  Hz, 1 H), 1.43 (d,  $J = 6.4$  Hz, 3 H), 1.27 (s, 9 H).

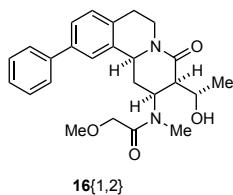

***N*-(3-(1-Hydroxyethyl)-4-oxo-10-phenyl-2,3,4,6,7,11*b*-hexahydro-1*H*-pyrido[2,1-*a*]isoquinolin-2-yl)-2-methoxy-*N*-methylacetamide (16{1,2}).** Prepared according to the representative procedure for the formation of amides. Purification: EtOAc/MeOH (100 : 0 → 90 : 10). Yield: 64% (26 mg colorless solid). Data: mp 93-94 °C;  $^1\text{H}$  NMR (400 MHz)  $\delta$  7.56-7.55 (comp, 2 H), 7.48-7.44 (comp, 3 H), 7.40-7.36 (comp, 2 H), 7.28 (d,  $J = 8.0$  Hz, 1 H), 5.66-5.60 (m, 1 H), 4.74 (dd,  $J = 12.0, 4.4$  Hz, 1 H), 4.66 (ddd,  $J = 12.8, 4.0, 4.0$  Hz, 1 H), 4.26 (d,  $J = 3.2$  Hz, 1 H), 4.07 (s, 3 H), 3.42 (s, 3 H), 3.13 (ddd,  $J = 14.0, 13.2, 6.8$  Hz, 1 H), 2.93-2.90 (comp, 2 H), 2.83 (s, 3 H), 2.76 (ddd,  $J = 14.8, 10.4, 4.8$  Hz, 1 H), 2.57-2.55 (m, 1 H), 1.74 (ddd,  $J = 14.8, 11.6, 4.8$  Hz, 1 H), 1.42 (d,  $J = 6.0$  Hz, 3 H);  $^{13}\text{C}$  NMR (125 MHz)  $\delta$  171.4, 171.0, 140.4, 140.3, 135.3, 133.5, 129.3, 128.9, 127.6, 127.0, 126.1, 124.8, 71.3, 64.5, 59.2, 53.1, 50.8, 46.9, 38.1, 36.5, 29.7, 28.9, 20.8; IR (neat) 3433, 2929, 1647, 1412, 1103, 732  $\text{cm}^{-1}$ ; mass spectrum (CI)  $m/z$  423.2275 [ $\text{C}_{25}\text{H}_{31}\text{N}_2\text{O}_4$  (M+1) requires 423.2284]; LCMS purity: 94%.

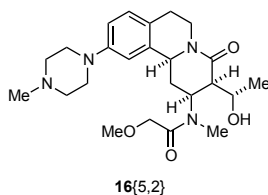

***N*-(3-(1-Hydroxyethyl)-10-(4-methylpiperazin-1-yl)-4-oxo-2,3,4,6,7,11*b*-hexahydro-1*H*-pyrido[2,1-*a*]isoquinolin-2-yl)-2-methoxy-*N*-methylacetamide (16{5,2}).** Prepared according to the representative procedure for the formation of amides. Purification: EtOAc/MeOH (60 : 40) with 1%  $\text{Et}_3\text{N}$ . Yield: 84% (33 mg yellow solid). Data: mp 84-85 °C;  $^1\text{H}$  NMR (600 MHz)  $\delta$  7.09 (d,  $J = 8.4$  Hz, 1 H), 6.84 (dd,  $J = 8.4, 2.4$  Hz, 1 H), 6.67 (d,  $J = 2.4$  Hz, 1 H), 5.62-5.60 (m, 1 H), 4.63-4.58 (comp, 2 H), 4.07 (s, 3 H), 3.41 (s, 3 H), 3.19-3.17 (comp, 4 H), 3.03 (ddd,  $J = 12.6, 8.4, 6.6$  Hz, 1 H), 2.81 (s, 3 H), 2.79-2.76 (comp, 3 H), 2.67 (ddd,  $J =$

15.0, 10.2, 4.8 Hz, 1 H), 2.60-2.58 (comp, 4 H), 2.51-2.49 (m, 1 H), 2.36 (s, 3 H), 1.67 (ddd,  $J = 15.0, 12.0, 5.4$  Hz, 1 H), 1.41 (d,  $J = 6.0$  Hz, 3 H);  $^{13}\text{C}$  NMR (150 MHz)  $\delta$  171.4, 171.0, 150.5, 135.5, 129.5, 125.5, 115.4, 113.4, 71.4, 64.6, 59.2, 55.0, 53.3, 50.8, 49.2, 46.8, 46.1, 38.4, 36.7, 29.7, 28.3, 20.8; IR (neat) 3411, 2935, 2822, 1648, 1424, 1247, 1104, 731  $\text{cm}^{-1}$ ; mass spectrum (ESI)  $m/z$  445.2811 [ $\text{C}_{24}\text{H}_{37}\text{N}_4\text{O}_4$  (M+1) requires 445.2815]; LCMS purity: 96%.

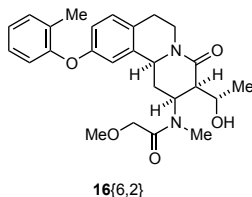

***N*-(3-(1-Hydroxyethyl)-4-oxo-10-(*o*-tolylloxy)-2,3,4,6,7,11*b*-hexahydro-1*H*-pyrido[2,1-*a*]isoquinolin-2-yl)-2-methoxy-*N*-methylacetamide (16{6,2})**. Prepared according to the representative procedure for the formation of amides. Purification: EtOAc/MeOH (100 : 0  $\rightarrow$  90 : 10). Yield: 79% (31 mg yellow solid). Data:  $^1\text{H}$  NMR (400 MHz)  $\delta$  7.28-7.26 (m, 1 H), 7.20-7.16 (m, 1 H), 7.14-7.08 (comp, 2 H), 6.88 (dd,  $J = 8.0, 1.2$  Hz, 1 H), 6.79 (dd,  $J = 8.4, 2.4$  Hz, 1 H), 6.66 (d,  $J = 2.4$  Hz, 1 H), 5.60-5.54 (m, 1 H), 4.64-4.55 (comp, 2 H), 4.19 (d,  $J = 2.8$  Hz, 1 H), 4.06 (s, 3 H), 3.42 (s, 3 H), 3.07 (ddd,  $J = 14.8, 8.4, 8.4$  Hz, 1 H), 2.84-2.81 (comp, 5 H), 2.59 (ddd,  $J = 14.8, 10.0, 4.4$  Hz, 1 H), 2.49-2.46 (m, 1 H), 2.23 (s, 3 H), 1.66 (ddd,  $J = 14.8, 12.0, 5.2$  Hz, 1 H), 1.39 (d,  $J = 6.0$  Hz, 3 H); LCMS purity: 97%.

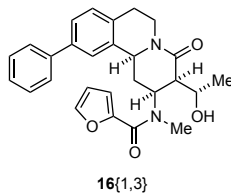

***N*-(3-(1-Hydroxyethyl)-4-oxo-10-phenyl-2,3,4,6,7,11*b*-hexahydro-1*H*-pyrido[2,1-*a*]isoquinolin-2-yl)-*N*-methylfuran-2-carboxamide (16{1,3})**. Prepared according to the representative procedure for the formation of amides. Purification: EtOAc. Yield: 44% (20 mg yellow solid). Data: mp 98-100  $^{\circ}\text{C}$ ;  $^1\text{H}$  NMR (500 MHz)  $\delta$  7.57-7.55 (comp, 2 H), 7.49-7.44 (comp, 4 H), 7.39-7.36 (comp, 2 H), 7.29 (d,  $J = 8.0$  Hz, 1 H), 7.05 (d,  $J = 3.5$  Hz, 1 H), 6.48 (dd,  $J = 3.5, 2.0$  Hz, 1 H), 5.71-5.61 (m, 1 H), 4.77 (dd,  $J = 12.0, 4.5$  Hz, 1 H), 4.72-4.68 (m, 1 H), 4.14-4.11 (m, 1 H), 3.13-3.09 (comp, 2 H), 2.95-2.92 (comp, 2 H), 2.80 (ddd,  $J = 14.5, 10.0, 4.5$  Hz, 1 H), 2.66-2.63 (m, 1 H), 2.17 (s, 3 H), 1.86 (ddd,  $J = 14.5, 12.0, 5.5$  Hz, 1 H), 1.45 (d,  $J = 6.5$  Hz, 3 H);  $^{13}\text{C}$  NMR (125 MHz)  $\delta$  171.3, 161.8, 144.5, 140.4, 140.3, 135.4, 133.7, 129.3,

128.9, 127.6, 127.0, 126.1, 124.9, 117.9, 111.5, 64.7, 53.4, 51.0, 48.3, 38.2, 36.8, 32.1, 30.9, 29.0, 21.2; IR (neat) 3417, 2932, 1647, 1487, 1409, 1070, 887, 834, 762, 734, 699  $\text{cm}^{-1}$ ; mass spectrum (ESI)  $m/z$  445.2125 [ $\text{C}_{27}\text{H}_{30}\text{N}_2\text{O}_4$  (M+1) requires 445.2127]; LCMS purity: 95%.

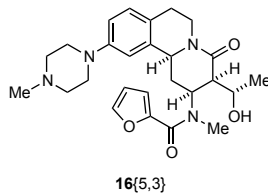

***N*-(3-(1-Hydroxyethyl)-10-(4-methylpiperazin-1-yl)-4-oxo-2,3,4,6,7,11*b*-hexahydro-1*H*-pyrido[2,1-*a*]isoquinolin-2-yl)-*N*-methylfuran-2-carboxamide (16{5,3}).** Prepared according to the representative procedure for the formation of amides. Purification: EtOAc/MeOH (60 : 40) with 1%  $\text{Et}_3\text{N}$ . Yield: 85% (39 mg yellow oil). Data:  $^1\text{H}$  NMR (400 MHz)  $\delta$  7.49 (dd,  $J = 1.6, 0.8$  Hz, 1 H), 7.10 (d,  $J = 8.4$  Hz, 1 H), 7.04 (d,  $J = 3.2$  Hz, 1 H), 6.84 (dd,  $J = 8.4, 2.4$  Hz, 1 H), 6.70 (d,  $J = 2.4$  Hz, 1 H), 6.48 (dd,  $J = 3.6, 1.6$  Hz, 1 H), 5.65-5.63 (m, 1 H), 4.67-4.62 (comp, 2 H), 4.15-4.08 (m, 1 H), 3.22-3.20 (comp, 4 H), 3.12-2.99 (comp, 4 H), 2.82-2.78 (comp, 2 H), 2.72 (ddd,  $J = 14.4, 10.0, 4.4$  Hz, 1 H), 2.65-2.58 (comp, 5 H), 2.39 (s, 3 H), 1.79 (ddd,  $J = 14.4, 12.0, 5.6$  Hz, 1 H), 1.43 (d,  $J = 6.4$  Hz, 3 H); LCMS purity: 95%.

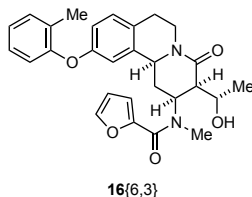

***N*-(3-(1-Hydroxyethyl)-4-oxo-10-(*o*-tolylloxy)-2,3,4,6,7,11*b*-hexahydro-1*H*-pyrido[2,1-*a*]isoquinolin-2-yl)-*N*-methylfuran-2-carboxamide (16{6,3}).** Prepared according to the representative procedure for the formation of amides. Purification: EtOAc. Yield: 69% (31 mg yellow oil). Data:  $^1\text{H}$  NMR (400 MHz)  $\delta$  7.49 (dd,  $J = 2.0, 0.8$  Hz, 1 H), 7.28-7.26 (m, 1 H), 7.20-7.07 (comp, 3 H), 7.04 (d,  $J = 3.2$  Hz, 1 H), 6.89 (dd,  $J = 8.0, 1.2$  Hz, 1 H), 6.79 (dd,  $J = 8.4, 2.4$  Hz, 1 H), 6.69 (d,  $J = 2.4$  Hz, 1 H), 6.48 (dd,  $J = 3.6, 1.6$  Hz, 1 H), 5.68-5.55 (m, 1 H), 4.65 (ddd,  $J = 12.8, 4.0, 4.0$  Hz, 1 H), 4.60 (dd,  $J = 12.0, 4.4$  Hz, 1 H), 4.13-4.09 (m, 1 H), 3.09-3.04 (comp, 4 H), 2.85-2.82 (comp, 2 H), 2.64 (ddd,  $J = 14.8, 10.0, 4.4$  Hz, 1 H), 2.58-2.54 (m, 1 H), 2.28 (s, 3 H), 1.79 (ddd,  $J = 14.8, 12.4, 6.0$  Hz, 1 H), 1.42 (d,  $J = 6.0$  Hz, 3 H); LCMS purity: 91%.

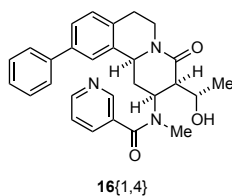

***N*-(3-(1-Hydroxyethyl)-4-oxo-10-phenyl-2,3,4,6,7,11*b*-hexahydro-1*H*-pyrido[2,1-*a*]isoquinolin-2-yl)-*N*-methylnicotinamide (16{1,4}).** Prepared according to the representative procedure for the formation of amides with the following modification: 2.2 equivalents of Et<sub>3</sub>N were used, rather than 1.2 equivalents. Purification: EtOAc/MeOH (90 : 10) with 1% Et<sub>3</sub>N. Yield: 81% (38 mg yellow solid). Data: mp 130-132 °C; <sup>1</sup>H NMR (400 MHz) δ 8.66-8.64 (comp, 2 H), 7.75 (d, *J* = 7.6 Hz, 1 H), 7.56 (d, *J* = 7.2 Hz, 2 H), 7.50-7.45 (comp, 3 H), 7.40-7.28 (comp, 4 H), 5.77-5.75 (m, 1 H), 4.78-4.76 (m, 1 H), 4.69-4.66 (m, 1 H), 4.35-4.33 (m, 1 H), 4.34-4.32 (m, 1 H), 3.14-3.08 (m, 1 H), 2.97-2.88 (comp, 3 H), 2.85 (s, 3 H), 2.67-2.64 (m, 1 H), 1.86-1.78 (m, 1 H), 1.45 (d, *J* = 6.4 Hz, 3 H); <sup>13</sup>C NMR (125 MHz) δ 171.8, 170.4, 150.9, 147.9, 140.4, 140.3, 135.2, 134.8, 133.5, 131.9, 129.3, 128.9, 127.6, 127.0, 126.1, 124.8, 123.3, 64.9, 53.2, 49.8, 46.8, 38.2, 37.0, 33.3, 28.9, 20.5; IR (neat) 3419, 2932, 1634, 1486, 1409, 1073, 765, 733, 700 cm<sup>-1</sup>; mass spectrum (ESI) *m/z* 456.2280 [C<sub>28</sub>H<sub>31</sub>N<sub>3</sub>O<sub>3</sub> (M+1) requires 456.2287]; LCMS purity: 94%.

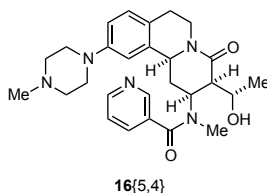

***N*-(3-(1-Hydroxyethyl)-10-(4-methylpiperazin-1-yl)-4-oxo-2,3,4,6,7,11*b*-hexahydro-1*H*-pyrido[2,1-*a*]isoquinolin-2-yl)-*N*-methylnicotinamide (16{5,4}).** Prepared according to the representative procedure for the formation of amides, with the following modification: 2.2 equivalents of Et<sub>3</sub>N were used, rather than 1.2 equivalents. Purification: EtOAc/MeOH (55 : 45) with 1% Et<sub>3</sub>N. Yield: 99% (47 mg yellow oil). Data: <sup>1</sup>H NMR (400 MHz) δ 8.65-8.63 (comp, 2 H), 7.77-7.75 (m, 1 H), 7.33 (ddd, *J* = 7.6, 4.8, 0.8 Hz, 1 H), 7.10 (d, *J* = 8.0 Hz, 1 H), 6.85 (dd, *J* = 8.4, 2.4 Hz, 1 H), 6.72-6.70 (m, 1 H), 5.76-5.74 (m, 1 H), 4.66-4.62 (comp, 2 H), 4.34-4.32 (m, 1 H), 3.22-3.19 (comp, 4 H), 3.02-2.96 (comp, 2 H), 2.83-2.79 (comp, 5 H), 2.62-2.59 (comp, 5 H), 2.37 (s, 3 H), 1.79-1.76 (m, 1 H), 1.44-1.43 (comp, 3 H); LCMS purity: 94%.

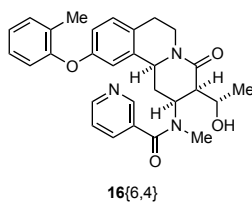

***N*-(3-(1-Hydroxyethyl)-4-oxo-10-(*o*-tolylloxy)-2,3,4,6,7,11*b*-hexahydro-1*H*-pyrido[2,1-*a*]isoquinolin-2-yl)-*N*-methylnicotinamide (16{6,4})**. Prepared according to the representative procedure for the formation of amides, with the following modification: 2.2 equivalents of Et<sub>3</sub>N were used, rather than 1.2 equivalents. Purification: EtOAc/MeOH (90 : 10). Yield: 80% (37 mg yellow solid). Data: <sup>1</sup>H NMR (400 MHz) δ 8.65-8.64 (comp, 2 H), 7.77-7.75 (m, 1 H), 7.33 (ddd, *J* = 7.6, 4.8, 0.8 Hz, 1 H), 7.29-7.26 (m, 1 H), 7.22-7.18 (m, 1 H), 7.14-7.09 (comp, 2 H), 6.90 (dd, *J* = 8.0, 0.8 Hz, 1H), 6.81-6.79 (m, 1 H), 6.72-6.67 (m, 1 H), 5.73-5.68 (m, 1 H), 4.67-4.64 (m, 1 H), 4.60-4.58 (m, 1 H), 4.32-4.29 (comp, 2 H), 3.05-3.02 (m, 1 H), 2.97-2.93 (m, 1 H), 2.83 (s, 3 H), 2.76-2.70 (m, 1 H), 2.58-2.54 (m, 1 H), 2.42 (s, 3 H), 1.76-1.69 (m, 1 H), 1.42 (d, *J* = 6.0 Hz, 3 H); LCMS purity: 90%.

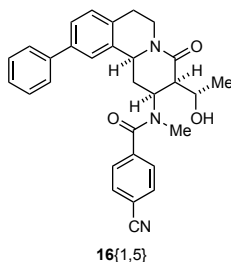

**4-Cyano-*N*-(3-(1-hydroxyethyl)-4-oxo-10-phenyl-2,3,4,6,7,11*b*-hexahydro-1*H*-pyrido[2,1-*a*]isoquinolin-2-yl)-*N*-methylbenzamide (16{1,5})**. Prepared according to the representative procedure for the formation of amides, with the following modifications: Upon addition of the *p*-cyanobenzoyl chloride to the reaction mixture, the reaction was stirred for 48 h at room temperature rather than for 3 h at 0 °C. After stirring for 24 h at room temperature, an extra 0.5 equivalent of *p*-cyanobenzoyl chloride was added. Purification: EtOAc/MeOH (100 : 0 → 90 : 10). Yield: 74% (31 mg colorless solid). Data: mp 100-101 °C; <sup>1</sup>H NMR (400 MHz) δ 7.68 (d, *J* = 8.0 Hz, 2 H), 7.57-7.55 (comp, 2 H), 7.52-7.45 (comp, 6 H), 7.42-7.37 (m, 1 H), 7.30-7.28 (m, 1 H), 5.79-5.75 (m, 1 H), 4.75 (dd, *J* = 12.8, 4.8 Hz, 1 H), 4.70-4.67 (m, 1 H), 4.41-4.38 (m, 1 H), 4.29-4.23 (m, 1 H), 3.16-3.09 (m, 1 H), 2.97-2.91 (comp, 3 H), 2.78 (s, 3 H), 2.65-2.62 (m, 1 H), 1.83-1.76 (m, 1 H), 1.44 (d, *J* = 6.0 Hz, 3 H); <sup>13</sup>C NMR (125 MHz) δ 171.0, 169.8, 139.4, 139.4, 139.3, 134.2, 132.4, 131.4, 128.4, 127.9, 126.7, 126.6, 126.0, 125.2, 123.8,

117.1, 112.6, 64.0, 52.2, 48.4, 45.4, 37.3, 36.2, 32.1, 27.9, 19.2; IR (neat) 3430, 2918, 1634, 1410, 1068, 912, 732  $\text{cm}^{-1}$ ; mass spectrum (CI)  $m/z$  480.2289 [ $\text{C}_{30}\text{H}_{30}\text{N}_3\text{O}_3$  (M+1) requires 480.2287]; LCMS purity: 96%.

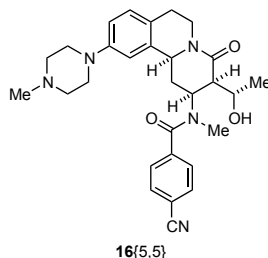

**4-Cyano-N-(3-(1-hydroxyethyl)-10-(4-methylpiperazin-1-yl)-4-oxo-2,3,4,6,7,11b-hexahydro-1H-pyrido[2,1-a]isoquinolin-2-yl)-N-methylbenzamide (16{5,5}).** Prepared according to the representative procedure for the formation of amides, with the following modifications: Upon addition of the *p*-cyanobenzoyl chloride to the reaction mixture, the reaction was stirred for 48 h at room temperature rather than for 3 h at 0 °C. After stirring for 24 h at room temperature, an extra 0.5 equivalent of *p*-cyanobenzoyl chloride was added. Purification: EtOAc/MeOH (60 : 40) with 1%  $\text{Et}_3\text{N}$ . Yield: 89% (32 mg colorless solid). Data:  $^1\text{H}$  NMR (400 MHz)  $\delta$  7.68 (d,  $J = 8.0$  Hz, 2 H), 7.51 (d,  $J = 8.0$  Hz, 2 H), 7.09 (d,  $J = 8.4$  Hz, 1 H), 6.84 (dd,  $J = 8.4, 2.0$  Hz, 1 H), 6.70 (d,  $J = 2.0$  Hz, 1 H), 5.77-5.72 (m, 1 H), 4.65-4.59 (comp, 2 H), 4.40-4.37 (m, 1 H), 3.28-3.22 (comp, 4 H), 3.04-3.00 (m, 1 H), 2.86-2.75 (comp, 6 H), 2.69-2.63 (comp, 4 H), 2.60-2.57 (m, 1 H), 2.42 (s, 3 H), 1.74-1.66 (m, 1H), 1.41 (d,  $J = 6.4$  Hz, 3 H); LCMS purity: 95%.

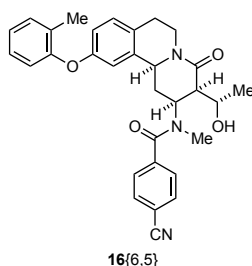

**4-Cyano-N-(3-(1-hydroxyethyl)-4-oxo-10-(*o*-tolyloxy)-2,3,4,6,7,11b-hexahydro-1H-pyrido[2,1-a]isoquinolin-2-yl)-N-methylbenzamide (16{6,5}).** Prepared according to the representative procedure for the formation of amides, with the following modifications: Upon addition of the *p*-cyanobenzoyl chloride to the reaction mixture, the reaction was stirred for 48 h at room temperature rather than for 3 h at 0 °C. After stirring for 24 h at room temperature, an extra 0.5 equivalent of *p*-cyanobenzoyl chloride was added. Purification: EtOAc/MeOH (90 :

10). Yield: 88% (32 mg colorless solid). Data: mp 126-127 °C; <sup>1</sup>H NMR (500 MHz) δ 7.68 (d, *J* = 8.5 Hz, 2 H), 7.51 (d, *J* = 8.5 Hz, 1 H), 7.29-7.27 (m, 1 H), 7.21-7.18 (m, 1 H), 7.14-7.10 (comp, 2 H), 6.90 (d, *J* = 8.0 Hz, 1 H), 6.80 (dd, *J* = 8.0, 2.5 Hz, 1 H), 6.67 (d, *J* = 2.5 Hz, 1 H), 5.72-5.68 (m, 1 H), 4.67-4.62 (m, 1 H), 4.58-4.56 (m, 1 H), 4.39-4.35 (m, 1 H), 4.21-4.20 (m, 1 H), 3.08-3.03 (m, 1 H), 2.86-2.80 (comp, 2 H), 2.76 (s, 3 H), 2.75-2.70 (m, 1 H), 2.56-2.54 (m, 1 H), 2.24 (s, 3 H), 1.72-1.66 (m, 1 H), 1.40 (d, *J* = 6.5 Hz, 3 H); <sup>13</sup>C NMR (125 MHz) δ 172.0, 170.7, 157.2, 154.0, 140.4, 136.1, 132.4, 131.7, 130.2, 130.1, 128.1, 127.6, 127.3, 124.5, 119.9, 118.1, 116.4, 114.3, 113.6, 65.0, 53.0, 49.3, 46.2, 38.4, 37.1, 33.1, 28.4, 20.1, 16.2; IR (neat) 3431, 2932, 2231, 1638, 1488, 1410, 1251, 731 cm<sup>-1</sup>; mass spectrum (ESI) *m/z* 510.2386 [C<sub>31</sub>H<sub>32</sub>N<sub>3</sub>O<sub>4</sub> (M+1) requires 510.2393]; LCMS purity: 92%.

#### Representative procedure for the formation of sulfonamides:

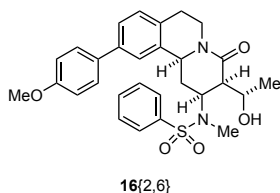

***N*-(3-(1-Hydroxyethyl)-10-(4-methoxyphenyl)-4-oxo-2,3,4,6,7,11*b*-hexahydro-1*H*-pyrido[2,1-*a*]isoquinolin-2-yl)-*N*-methylbenzenesulfonamide (16{2,6}).** Phenyl sulfonyl chloride (**15{6}**) (22 mg, 16 μL, 0.12 mmol) was added to a solution of 1,3-amino alcohol **14{2}** (43 mg, 0.11 mmol) and Et<sub>3</sub>N (14 mg, 19 μL, 0.14 mmol) in anhydrous CH<sub>2</sub>Cl<sub>2</sub> (0.6 mL), and was stirred for 2 h at room temperature. Saturated NaHCO<sub>3</sub> (5 mL) and CH<sub>2</sub>Cl<sub>2</sub> (5 mL) were added, and the layers were separated. The aqueous layer was extracted with CH<sub>2</sub>Cl<sub>2</sub> (2 × 5 mL), and the organic layer was dried (Na<sub>2</sub>SO<sub>4</sub>), filtered, and concentrated under reduced pressure. The resultant yellow oil was purified by flash column chromatography eluting with EtOAc to give 38 mg (64%) of **16{2,6}** as a yellow solid: <sup>1</sup>H NMR (400 MHz) δ 7.80-7.77 (comp, 2 H), 7.54-7.46 (comp, 3 H), 7.43 (d, *J* = 8.8 Hz, 2 H), 7.38 (dd, *J* = 7.6, 1.6 Hz, 1 H), 7.19 (d, *J* = 7.6 Hz, 1 H), 7.10 (d, *J* = 1.6 Hz, 1 H), 7.00 (d, *J* = 8.8 Hz, 2 H), 5.03-4.97 (m, 1 H), 4.60-4.54 (comp, 2 H), 4.31 (ddd, *J* = 8.4, 6.0, 4.4 Hz, 1 H), 3.87 (s, 3 H), 3.71 (d, *J* = 4.0 Hz, 1 H), 3.07-3.01 (m, 1 H), 2.82-2.79 (m, 1 H), 2.75 (s, 3 H), 2.51 (dd, *J* = 8.4, 6.8 Hz, 1 H), 2.16 (ddd, *J* = 14.8, 10.0, 4.4 Hz, 1 H), 1.50 (d, *J* = 6.0 Hz, 3 H), 1.33-1.24 (m, 1 H); LCMS purity: 92%.

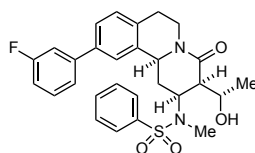

16{3,6}

***N*-(10-(3-Fluorophenyl)-3-(1-hydroxyethyl)-4-oxo-2,3,4,6,7,11*b*-hexahydro-1*H*-pyrido[2,1-*a*]isoquinolin-2-yl)-*N*-methylbenzenesulfonamide (16{3,6}).** Prepared according to the representative procedure for the formation of sulfonamides. Purification: EtOAc. Yield: 92% (64 mg yellow solid). Data: mp 194-195.5° C (colorless needles from 1 : 1 EtOH : H<sub>2</sub>O); <sup>1</sup>H NMR (400 MHz) δ 8.07-8.04 (m, 1 H), 7.82-7.79 (comp, 2 H), 7.77-7.74 (m, 1 H), 7.66-7.63 (m, 1 H), 7.58-7.54 (m, 1 H), 7.52-7.47 (m, 1 H), 7.42-7.39 (m, 1 H), 7.29-7.26 (m, 1 H), 7.17 (ddd, *J* = 10.4, 2.4, 2.0 Hz, 1 H), 7.11 (d, *J* = 1.2 Hz, 1 H), 7.08 (dddd, *J* = 8.4, 8.4, 2.8, 1.2 Hz, 1 H), 5.00 (ddd, *J* = 10.0, 5.6, 5.6 Hz, 1 H), 4.59-4.50 (comp, 2 H), 4.33-4.30 (m, 1 H), 3.69 (d, *J* = 3.2 Hz, 1 H), 3.09 (ddd, *J* = 14.0, 10.0, 4.4 Hz, 1 H), 2.84-2.79 (comp, 2 H), 2.75 (s, 3 H), 2.54-2.50 (m, 1 H), 2.17 (ddd, *J* = 14.4, 10.0, 4.4 Hz, 1 H), 1.50 (d, *J* = 6.4 Hz, 3 H), 1.28 (ddd, *J* = 14.8, 12.0, 5.6 Hz, 1 H); <sup>13</sup>C NMR (100 MHz) δ 170.6, 163.2 (*J*<sub>C-F</sub> = 244.7 Hz), 142.6 (*J*<sub>C-F</sub> = 7.5 Hz), 138.9, 135.3, 134.5, 133.2, 130.4 (*J*<sub>C-F</sub> = 8.1 Hz), 129.7, 129.5, 129.4, 127.0 (*J*<sub>C-F</sub> = 5.9 Hz), 126.0, 124.6, 122.5, 114.4 (*J*<sub>C-F</sub> = 20.8 Hz), 113.8 (*J*<sub>C-F</sub> = 22.3 Hz), 64.5, 52.9, 51.5, 50.8, 38.1, 34.6, 29.6, 29.0, 21.7; IR (neat) 3517, 2934, 1654, 1421, 1331, 1159, 736 cm<sup>-1</sup>; mass spectrum (CI) *m/z* 509.1917 [C<sub>28</sub>H<sub>30</sub>FN<sub>2</sub>O<sub>4</sub>S (M+1) requires 509.1910]; LCMS purity: 92%.

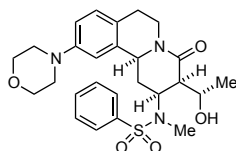

16{4,6}

***N*-(3-(1-Hydroxyethyl)-10-morpholino-4-oxo-2,3,4,6,7,11*b*-hexahydro-1*H*-pyrido[2,1-*a*]isoquinolin-2-yl)-*N*-methylbenzenesulfonamide (16{4,6}).** Prepared according to the representative procedure for the formation of sulfonamides. Purification: EtOAc. Yield: 61% (30 mg yellow solid). Data: <sup>1</sup>H NMR (400 MHz) δ 7.80-7.78 (comp, 2 H), 7.56-7.55 (comp, 3 H), 7.05 (d, *J* = 8.4 Hz, 1 H), 6.78 (dd, *J* = 8.4, 2.4 Hz, 1 H), 6.46 (d, *J* = 2.4 Hz, 1 H), 4.99 (ddd, *J* = 10.0, 5.6, 5.6 Hz, 1 H), 4.55 (ddd, *J* = 12.4, 3.6, 3.6 Hz, 1 H), 4.45 (dd, *J* = 12.0, 4.4 Hz, 1 H), 4.29 (ddd, *J* = 8.4, 6.0, 4.4 Hz, 1 H), 3.88-3.88 (comp, 4 H), 3.68 (d, *J* = 4.4 Hz, 1 H), 3.09-3.06 (comp, 4 H), 2.98-2.91 (m, 1 H), 2.73 (s, 3 H), 2.71-2.69 (m, 1 H), 2.47 (dd, *J* = 8.0, 7.2 Hz,



1 H), 2.12 (ddd,  $J = 14.4, 10.0, 4.0$  Hz, 1 H), 1.49 (d,  $J = 5.6$  Hz, 3 H), 1.27 (ddd,  $J = 14.4, 12.0, 5.2$  Hz, 1 H).

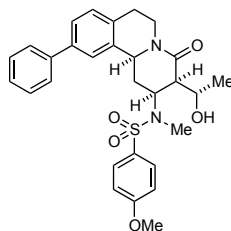

16{1,7}

***N*-(3-(1-Hydroxyethyl)-4-oxo-10-phenyl-2,3,4,6,7,11*b*-hexahydro-1*H*-pyrido[2,1-*a*]isoquinolin-2-yl)-4-methoxy-*N*-methylbenzenesulfonamide (16{1,7})**. Prepared according to the representative procedure for the formation of sulfonamides. Purification: pentane/EtOAc (45 : 55). Yield: 78% (36 mg colorless solid). Data:  $^1\text{H}$  NMR (400 MHz)  $\delta$  7.73-7.69 (comp, 2 H), 7.52-7.36 (comp, 6 H), 7.23 (d,  $J = 8.0$  Hz, 1 H), 7.16 (d,  $J = 1.2$  Hz, 1 H), 6.95-6.91 (comp, 2 H), 5.01-4.95 (m, 1 H), 4.60-4.52 (comp, 2 H), 4.33-4.29 (m, 1 H), 3.76 (s, 3 H), 3.76-3.72 (m, 1 H), 3.08 (ddd,  $J = 14.4, 10.0, 4.4$  Hz, 1 H), 2.86-2.79 (comp, 2 H), 2.72 (s, 3 H), 2.53-2.49 (m, 1 H), 2.17 (ddd,  $J = 14.4, 10.0, 4.4$  Hz, 1 H), 1.50 (d,  $J = 6.0$  Hz, 3 H), 1.30 (ddd,  $J = 14.4, 12.0, 5.2$  Hz, 1 H); LCMS purity: 96%.

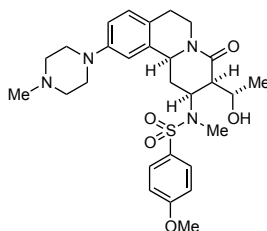

16{5,7}

***N*-(3-(1-Hydroxyethyl)-10-(4-methylpiperazin-1-yl)-4-oxo-2,3,4,6,7,11*b*-hexahydro-1*H*-pyrido[2,1-*a*]isoquinolin-2-yl)-4-methoxy-*N*-methylbenzenesulfonamide (16{5,7})**. Prepared according to the representative procedure for the formation of sulfonamides. Purification: EtOAc/MeOH (65 : 35) with 1% Et<sub>3</sub>N. Yield: 55% (25 mg yellow solid). Data:  $^1\text{H}$  NMR (300 MHz)  $\delta$  7.69 (d,  $J = 9.0$  Hz, 2 H), 7.03 (d,  $J = 8.4$  Hz, 1 H), 6.92 (d,  $J = 9.0$  Hz, 2 H), 6.78 (dd,  $J = 8.4, 2.1$  Hz, 1 H), 6.50 (d,  $J = 2.1$  Hz, 1 H), 5.00-4.93 (m, 1 H), 4.55-4.42 (comp, 2 H), 4.33-4.24 (m, 1 H), 3.83 (s, 3 H), 3.14-3.12 (comp, 4 H), 2.99-2.90 (m 1 H), 2.69 (s, 3 H), 2.69-2.60 (comp, 2 H), 2.59-2.57 (comp, 4 H), 2.48-2.43 (m, 1 H), 2.37 (s, 3 H), 2.13 (ddd,  $J = 14.4, 10.2, 4.5$  Hz, 1 H), 1.47 (d,  $J = 6.0$  Hz, 3 H), 1.32-1.21 (m, 1 H); LCMS purity: 98%.

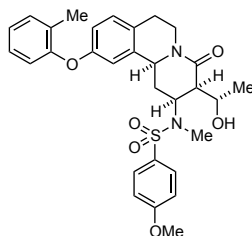

16{6,7}

***N*-(3-(1-Hydroxyethyl)-4-oxo-10-(*o*-tolyloxy)-2,3,4,6,7,11*b*-hexahydro-1*H*-pyrido[2,1-*a*]isoquinolin-2-yl)-4-methoxy-*N*-methylbenzenesulfonamide (16{6,7})**. Prepared according to the representative procedure for the formation of sulfonamides. Purification: pentane/EtOAc (3 : 7). Yield: 75% (34 mg colorless solid). Data: mp 198-199 °C; <sup>1</sup>H NMR (500 MHz) δ 7.68 (d, *J* = 9.0 Hz, 2 H), 7.26-7.25 (m, 1 H), 7.18-7.15 (m, 1 H), 7.08 (ddd, *J* = 7.5, 7.5, 1.0 Hz, 1 H), 7.04 (d, *J* = 8.0 Hz, 1 H), 6.92 (d, *J* = 9.0 Hz, 2 H), 6.80 (dd, *J* = 8.0, 1.0 Hz, 1 H), 6.70 (dd, *J* = 8.5, 2.5 Hz, 1 H), 6.49 (d, *J* = 2.5 Hz, 1 H), 4.89 (ddd, *J* = 10.0, 6.5, 5.5 Hz, 1 H), 4.54 (ddd, *J* = 13.0, 4.5, 4.5 Hz, 1 H), 4.40 (dd, *J* = 13.0, 4.5 Hz, 1 H), 4.26 (ddd, *J* = 8.5, 6.0, 4.0 Hz, 1 H), 3.83 (s, 3 H), 3.65 (d, *J* = 4.0 Hz, 1 H), 2.99-2.93 (m, 1 H), 2.76-2.65 (comp, 2 H), 2.68 (s, 3 H), 2.42-2.39 (m, 1 H), 2.18 (s, 3 H), 2.01 (ddd, *J* = 14.0, 10.0, 4.0 Hz, 1 H), 1.45 (d, *J* = 6.0 Hz, 3 H), 1.25-1.19 (m, 1 H); <sup>13</sup>C NMR (125 MHz) δ 170.6, 163.2, 156.8, 154.1, 136.1, 131.6, 130.2, 130.0, 129.8, 129.2, 128.4, 127.2, 124.4, 119.5, 116.2, 114.6, 114.5, 64.5, 55.6, 52.8, 51.5, 50.5, 38.2, 34.7, 29.5, 28.5, 21.6, 16.1; IR (neat) 3519, 2933, 1650, 1596, 1497, 1418, 1332, 1257, 1185, 1153, 1092, 730 cm<sup>-1</sup>; mass spectrum (CI) *m/z* 551.2217 [C<sub>30</sub>H<sub>35</sub>N<sub>2</sub>O<sub>6</sub>S (M+1) requires 551.2216]; LCMS purity: 97%.

**Representative procedure for the formation of ureas:**

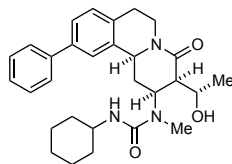

16{1,8}

**3-Cyclohexyl-1-(3-(1-hydroxyethyl)-4-oxo-10-phenyl-2,3,4,6,7,11*b*-hexahydro-1*H*-pyrido[2,1-*a*]isoquinolin-2-yl)-1-methylurea (16{1,8})**. A mixture of cyclohexyl isocyanate (**15{8}**) (12 mg, 12 μL, 0.094 mmol) and 1,3-amino alcohol **14{1}** (30 mg, 0.086 mmol) in CH<sub>2</sub>Cl<sub>2</sub> (0.5 mL) was stirred for 1.5 h at room temperature. The solvent was removed *in vacuo*,

and the resultant colorless residue was purified by flash column chromatography eluting with pentane/EtOAc (1 : 1) to give 32 mg (72%) of urea **16**{1,8} as a colorless solid: mp 120-121 °C; <sup>1</sup>H NMR (500 MHz) δ 7.57-7.55 (comp, 2 H), 7.47-7.44 (comp, 3 H), 7.39-7.36 (comp, 2 H), 7.28 (d, *J* = 8.0 Hz, 1 H), 5.50-5.46 (m, 1 H), 5.09 (br s, 1 H), 4.73 (dd, *J* = 12.0, 5.0 Hz, 1 H), 4.59 (ddd, *J* = 13.0, 4.0, 4.0 Hz, 1 H), 4.28 (d, *J* = 7.0 Hz, 1 H), 3.99-3.97 (m, 1 H), 3.65-3.61 (m, 1 H), 3.20-3.14 (m, 1 H), 2.92-2.89 (comp, 2 H), 2.77 (ddd, *J* = 15.5, 10.5, 5.0 Hz, 1 H), 2.68 (s, 3 H), 2.44 (dd, *J* = 9.0, 6.5 Hz, 1 H), 1.97-1.89 (m, 1 H), 1.75-1.59 (comp, 6 H), 1.47 (d, *J* = 6.0 Hz, 3 H), 1.39-1.31 (comp, 2 H), 1.19-1.03 (comp, 2 H); <sup>13</sup>C NMR (125 MHz) δ 171.5, 158.5, 140.4, 140.3, 135.7, 133.6, 129.2, 128.9, 127.6, 127.0, 126.0, 125.0, 64.3, 53.1, 52.7, 49.8, 47.7, 37.9, 37.3, 33.9, 29.5, 29.0, 25.6, 25.0, 21.3; IR (neat) 3332, 2931, 2855, 1650, 1531, 1422 cm<sup>-1</sup>; mass spectrum (ESI) *m/z* 498.2728 [C<sub>29</sub>H<sub>37</sub>N<sub>3</sub>O<sub>3</sub>Na (M + Na) requires 498.2733]; LCMS purity: 92%.

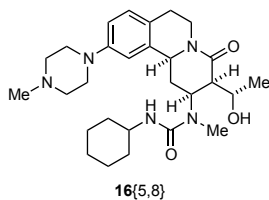

**3-Cyclohexyl-1-(3-(1-hydroxyethyl)-10-(4-methylpiperazin-1-yl)-4-oxo-2,3,4,6,7,11b-hexahydro-1H-pyrido[2,1-a]isoquinolin-2-yl)-1-methylurea (16{5,8}).** Prepared according to the representative procedure for the formation of ureas. Purification: EtOAc/MeOH (7 : 3). Yield: 62% (27 mg colorless solid). Data: <sup>1</sup>H NMR (400 MHz) δ 7.10 (d, *J* = 8.0 Hz, 1 H), 6.83 (dd, *J* = 8.0, 2.4 Hz, 1 H), 6.69 (d, *J* = 2.4 Hz, 1 H), 5.48-5.43 (m, 1 H), 5.08 (br s, 1 H), 4.61-4.53 (comp, 2 H), 4.27 (d, *J* = 8.0 Hz, 1 H), 3.98-3.95 (m, 1 H), 3.65-3.59 (m, 1 H), 3.34-3.24 (comp, 4 H), 3.10-3.04 (m, 1 H), 2.79-2.68 (comp, 6 H), 2.66 (s, 3 H), 2.53-2.44 (comp, 3 H), 2.39 (dd, *J* = 8.4, 5.6 Hz, 1 H), 1.97-1.88 (comp, 2 H), 1.72-1.60 (comp, 4 H), 1.45 (d, *J* = 6.0 Hz, 3 H), 1.37-1.05 (comp, 6 H); LCMS purity: 98%.

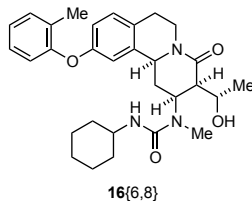

**3-Cyclohexyl-1-(3-(1-hydroxyethyl)-4-oxo-10-(*o*-tolylloxy)-2,3,4,6,7,11*b*-hexahydro-1*H*-pyrido[2,1-*a*]isoquinolin-2-yl)-1-methylurea (16{6,8}).** Prepared according to the representative procedure for the formation of ureas. Purification: pentane/EtOAc (1 : 1). Yield: 78% (31 mg colorless solid). Data: <sup>1</sup>H NMR (400 MHz) δ 7.28-7.26 (m, 1 H), 7.20-7.08 (comp, 3 H), 6.88 (d, *J* = 8.0 Hz, 1 H), 6.78 (dd, *J* = 8.0, 1.2 Hz, 1 H), 6.67 (d, *J* = 1.2 Hz, 1 H), 5.45-5.41 (m, 1 H), 5.02 (br s, 1 H), 4.58-4.54 (comp, 2 H), 4.27 (d, *J* = 8.4 Hz, 1 H), 3.97-3.94 (m, 1 H), 3.64-3.62 (m, 1 H), 3.15-3.08 (m, 1 H), 2.83-2.81 (comp, 2 H), 2.66 (s, 3 H), 2.61 (ddd, *J* = 14.8, 10.4, 4.4 Hz, 1 H), 2.38-2.34 (m, 1 H), 2.23 (s, 3 H), 1.96-1.89 (comp, 2 H), 1.68-1.59 (comp, 3 H), 1.44 (d, *J* = 6.0 Hz, 3 H), 1.37-1.26 (comp, 3 H), 1.15-1.04 (comp, 3 H); LCMS purity: 97%.

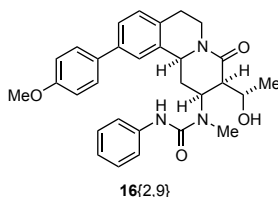

**1-(3-(1-Hydroxyethyl)-10-(4-methoxyphenyl)-4-oxo-2,3,4,6,7,11*b*-hexahydro-1*H*-pyrido[2,1-*a*]isoquinolin-2-yl)-1-methyl-3-phenylurea (16{2,9}).** Prepared according to the representative procedure for the formation of ureas, with the following modification: Instead of removing the CH<sub>2</sub>Cl<sub>2</sub> *in vacuo* at the end of the reaction, 2 mL of hexanes were added, resulting in a colorless precipitate. The colorless powder was collected via filtration, and was sufficiently pure. Yield: 69% (14 mg colorless powder). Data: mp 215-216 °C (colorless crystals from 1 : 1 EtOH : H<sub>2</sub>O); <sup>1</sup>H NMR (600 MHz) δ 7.49 (d, *J* = 9.0 Hz, 2 H), 7.43 (dd, *J* = 8.4, 2.4 Hz, 1 H), 7.34-7.32 (comp, 3 H), 7.30-7.26 (comp, 3 H), 7.06-7.03 (m, 1 H), 6.99 (d, *J* = 9.0 Hz, 2 H), 6.58 (br s, 1 H), 5.50-5.47 (m, 1 H), 4.73 (dd, *J* = 12.0, 4.2 Hz, 1 H), 4.63 (ddd, *J* = 12.6, 4.2, 4.2 Hz, 1 H), 4.42 (br s, 1 H), 4.19-4.14 (m, 1 H), 3.86 (s, 3 H), 3.19-3.14 (m, 1 H), 2.93-2.89 (comp, 2 H), 2.86 (s, 3 H), 2.80 (ddd, *J* = 15.0, 10.2, 4.8 Hz, 1 H), 2.54-2.52 (m, 1 H), 1.77 (ddd, *J* = 14.4,

12.0, 4.8 Hz, 1 H), 1.48 (d,  $J = 6.0$  Hz, 3 H);  $^{13}\text{C}$  NMR (150 MHz)  $\delta$  171.4, 159.4, 156.8, 140.0, 138.5, 135.4, 133.0, 132.9, 129.2, 128.9, 128.0, 125.7, 124.5, 123.6, 120.4, 114.4, 64.8, 55.4, 53.2, 51.7, 48.2, 38.1, 37.3, 29.9, 28.9, 21.4; IR (neat) 3319, 2928, 1645, 1610, 1536, 1496, 1443, 1246  $\text{cm}^{-1}$ ; mass spectrum (ESI)  $m/z$  500.2543 [ $\text{C}_{30}\text{H}_{34}\text{N}_3\text{O}_4$  (M+1) requires 500.2549]; LCMS purity: 93%.

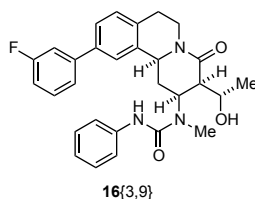

**1-(10-(3-Fluorophenyl)-3-(1-hydroxyethyl)-4-oxo-2,3,4,6,7,11b-hexahydro-1H-pyrido[2,1-a]isoquinolin-2-yl)-1-methyl-3-phenylurea (16{3,9})**. Prepared according to the representative procedure for the formation of ureas, with the following modification: Instead of removing the  $\text{CH}_2\text{Cl}_2$  *in vacuo* at the end of the reaction, 2 mL of hexanes were added, resulting in a colorless precipitate. The colorless powder was collected via filtration, and was sufficiently pure. Yield: 86% (34 mg colorless powder). Data:  $^1\text{H}$  NMR (400 MHz)  $\delta$  7.47 (dd,  $J = 8.0, 2.0$  Hz, 1 H), 7.43-7.39 (m, 1 H), 7.36-7.29 (comp, 7 H), 7.26-7.24 (m, 1 H), 7.07-7.05 (comp, 2 H), 6.56 (br s, 1 H), 5.53-5.49 (m, 1 H), 4.75 (dd,  $J = 11.6, 4.0$  Hz, 1 H), 4.65 (ddd,  $J = 13.2, 4.4, 4.4$  Hz, 1 H), 4.42 (br s, 1 H), 4.18-4.14 (m, 1 H), 3.20-3.14 (m, 1 H), 2.95-2.93 (comp, 2 H), 2.87 (s, 3 H), 2.81 (ddd,  $J = 15.2, 10.4, 4.4$  Hz, 1 H), 2.56-2.52 (m, 1 H), 1.78 (ddd,  $J = 15.2, 12.8, 5.2$  Hz, 1 H), 1.48 (d,  $J = 6.0$  Hz, 3 H).

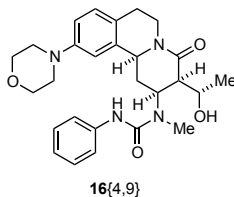

**1-(3-(1-Hydroxyethyl)-10-morpholino-4-oxo-2,3,4,6,7,11b-hexahydro-1H-pyrido[2,1-a]isoquinolin-2-yl)-1-methyl-3-phenylurea (16{4,9})**. Prepared according to the representative procedure for the formation of ureas, with the following modification: Instead of removing the  $\text{CH}_2\text{Cl}_2$  *in vacuo* at the end of the reaction, 2 mL of hexanes were added, resulting in a colorless precipitate. The colorless powder was collected via filtration, and was sufficiently pure. Yield: 74% (24 mg colorless powder). Data:  $^1\text{H}$  NMR (400 MHz)  $\delta$  7.36-7.29 (comp, 4 H), 7.12 (d,  $J = 8.4$  Hz, 1 H), 7.08-7.04 (m, 1 H), 6.83 (dd,  $J = 8.4, 2.4$  Hz, 1 H), 6.67 (d,  $J = 2.4$  Hz, 1 H), 6.56

(br s, 1 H), 5.50-5.45 (m, 1 H), 4.64-4.59 (comp, 2 H), 4.45 (br s, 1 H), 4.17-4.12 (m, 1 H), 3.88-3.86 (comp, 4 H), 3.15-3.12 (comp, 4 H), 3.11-3.04 (m, 1 H), 2.85 (s, 3 H), 2.81-2.79 (comp, 2 H), 2.72 (ddd,  $J = 14.8, 10.4, 4.4$  Hz, 1 H), 2.51-2.47 (m, 1 H), 1.71 (ddd,  $J = 14.8, 12.0, 5.2$  Hz, 1 H), 1.47 (d,  $J = 6.0$  Hz, 3 H).

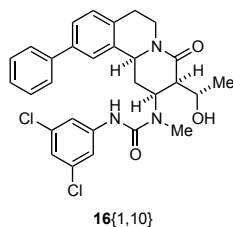

**3-(3,5-Dichlorophenyl)-1-(3-(1-hydroxyethyl)-4-oxo-10-phenyl-2,3,4,6,7,11b-hexahydro-1H-pyrido[2,1-a]isoquinolin-2-yl)-1-methylurea (16{1,10}).** Prepared according to the representative procedure for the formation of ureas. Purification: pentane/EtOAc (3 : 7). Yield: 73% (37 mg colorless powder). Data: mp 118-119 °C;  $^1\text{H}$  NMR (500 MHz)  $\delta$  7.56-7.54 (comp, 2 H), 7.49-7.44 (comp, 3 H), 7.38-7.35 (comp, 2 H), 7.30-7.29 (comp, 3 H), 6.99-6.98 (m, 1 H), 5.37-5.31 (m, 1 H), 4.73 (dd,  $J = 12.0, 4.0$  Hz, 1 H), 4.63 (ddd,  $J = 13.0, 4.0, 4.0$  Hz, 1 H), 4.22-4.18 (m, 1 H), 3.85 (br s, 1 H), 3.19-3.13 (m, 1 H), 2.93-2.90 (comp, 2 H), 2.81 (s, 3 H), 2.77 (ddd,  $J = 15.0, 10.5, 4.5$  Hz, 1 H), 2.56-2.53 (m, 1 H), 1.77 (ddd,  $J = 14.5, 12.0, 5.0$  Hz, 1 H), 1.50 (d,  $J = 6.0$  Hz, 3 H);  $^{13}\text{C}$  NMR (125 MHz)  $\delta$  171.1, 156.1, 141.0, 140.4, 140.3, 135.2, 135.0, 133.6, 129.3, 128.9, 127.6, 127.0, 126.2, 124.9, 122.9, 117.9, 65.2, 53.1, 51.1, 48.8, 38.2, 37.2, 29.8, 28.9, 21.8; IR (neat) 3332, 2933, 1645, 1586, 1486, 1414, 1325  $\text{cm}^{-1}$ ; mass spectrum (ESI)  $m/z$  538.1657 [ $\text{C}_{29}\text{H}_{29}\text{N}_3\text{O}_3^{35}\text{Cl}_2$  (M+1) requires 538.1664]; LCMS purity: 98%.

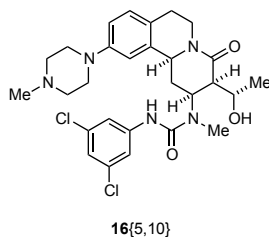

**3-(3,5-Dichlorophenyl)-1-(3-(1-hydroxyethyl)-10-(4-methylpiperazin-1-yl)-4-oxo-2,3,4,6,7,11b-hexahydro-1H-pyrido[2,1-a]isoquinolin-2-yl)-1-methylurea (16{5,10}).** Prepared according to the representative procedure for the formation of ureas. Purification: EtOAc/MeOH (6 : 4) with 1%  $\text{Et}_3\text{N}$ . Yield: 61% (30 mg colorless powder). Data:  $^1\text{H}$  NMR (400 MHz)  $\delta$  7.28 (d,  $J = 1.6$  Hz, 1 H), 7.12-7.04 (comp, 2 H), 7.00-6.98 (m, 1 H), 6.85-6.80 (m, 1 H), 6.67 (d,  $J = 2.4$  Hz, 1 H), 5.34-5.29 (m, 1 H), 4.64-4.57 (comp, 2 H), 4.23-4.16 (m, 1 H), 3.86 (br

s, 1 H), 3.19-3.17 (comp, 4 H), 3.09-3.03 (m, 1 H), 2.82-2.67 (comp, 6 H), 2.60-2.56 (comp, 4 H), 2.52-2.48 (m, 1 H), 2.36 (s, 3 H), 1.75-1.67 (comp, 2 H), 1.49 (d,  $J = 6.0$  Hz, 3 H); LCMS purity: 98%.

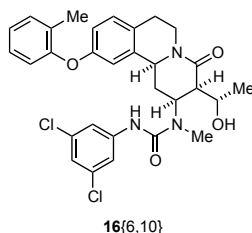

**3-(3,5-Dichlorophenyl)-1-(3-(1-hydroxyethyl)-4-oxo-10-(*o*-tolylloxy)-2,3,4,6,7,11b-hexahydro-1H-pyrido[2,1-*a*]isoquinolin-2-yl)-1-methylurea (16{6,10}).** Prepared according to the representative procedure for the formation of ureas. Purification: pentane/EtOAc (3 : 7). Yield: 48% (24 mg colorless powder). Data:  $^1\text{H}$  NMR (400 MHz)  $\delta$  7.28-7.25 (comp, 3 H), 7.20-7.07 (comp, 3 H), 6.98-6.97 (m, 1 H), 6.88 (d,  $J = 8.0$  Hz, 1 H), 6.81-6.79 (m, 1 H), 6.65-6.64 (m, 1 H), 5.30-5.22 (m, 1 H), 4.61-4.53 (comp, 2 H), 4.20-4.15 (m, 1 H), 3.78 (br s, 1 H), 3.12-3.05 (m, 1 H), 2.84-2.82 (comp, 2 H), 2.78 (s, 3 H), 2.60 (ddd,  $J = 14.0, 10.0, 3.6$  Hz, 1 H), 2.47-2.44 (m, 1 H), 2.22 (s, 3 H), 1.73-1.65 (m, 1 H), 1.47 (d,  $J = 6.0$  Hz, 3 H); LCMS purity: 98%.

#### Representative procedure for the formation of thioureas:

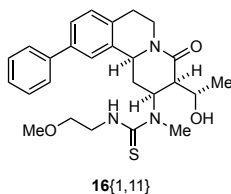

**1-(3-(1-Hydroxyethyl)-4-oxo-10-phenyl-2,3,4,6,7,11b-hexahydro-1H-pyrido[2,1-*a*]isoquinolin-2-yl)-3-(2-methoxyethyl)-1-methylthiourea (16{1,11}).** A mixture of 1-isothiocyanato-2-methoxyethane (**15{11}**) (12 mg, 11  $\mu\text{L}$ , 0.103 mmol) and 1,3-amino alcohol **14{1}** (30 mg, 0.086 mmol) in  $\text{CH}_2\text{Cl}_2$  (0.5 mL) was stirred for 1.5 h at room temperature. The solvent was removed *in vacuo*, and the resultant colorless residue was purified by flash column chromatography eluting with EtOAc/MeOH (100 : 0  $\rightarrow$  90 : 10) to give 17 mg (42%) of **16{1,11}** as a yellow solid: mp 151.5-153  $^\circ\text{C}$ ;  $^1\text{H}$  NMR (600 MHz)  $\delta$  7.55-7.53 (comp, 2 H), 7.47-7.43 (comp, 3 H), 7.38-7.35 (comp, 2 H), 7.27 (d,  $J = 8.4$  Hz, 1 H), 6.59-6.56 (m, 1 H), 6.00 (br s, 1 H), 4.71 (dd,  $J = 12.0, 3.6$  Hz, 1 H), 4.66 (ddd,  $J = 13.2, 4.2, 4.2$  Hz, 1 H), 4.13-4.07 (comp, 2 H), 3.90-3.79 (comp, 2 H), 3.54-3.53 (m, 2 H), 3.34 (s, 3 H), 3.17-3.12 (m, 1 H), 2.92-

2.84 (comp, 2 H), 2.87 (s, 3 H), 2.67-2.66 (m, 1 H), 1.63-1.57 (comp, 2 H), 1.45 (d,  $J = 6.6$  Hz, 3 H);  $^{13}\text{C}$  NMR (150 MHz)  $\delta$  182.3, 171.7, 140.4, 140.3, 135.3, 133.6, 129.2, 128.9, 127.6, 127.0, 126.0, 125.0, 70.6, 65.2, 58.8, 53.6, 53.4, 50.8, 46.1, 38.3, 37.5, 31.6, 29.0, 21.0; IR (neat) 3332, 2931, 1644, 1530, 1486, 1425, 1328, 1187, 1101, 764, 734, 699  $\text{cm}^{-1}$ ; mass spectrum (CI)  $m/z$  468.2320 [ $\text{C}_{26}\text{H}_{34}\text{N}_3\text{O}_3\text{S}$  (M+1) requires 468.2321]; LCMS purity: 98%.

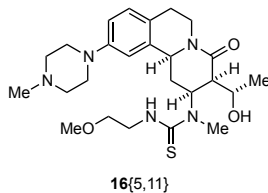

**1-(3-(1-Hydroxyethyl)-10-(4-methylpiperazin-1-yl)-4-oxo-2,3,4,6,7,11b-hexahydro-1H-pyrido[2,1-a]isoquinolin-2-yl)-3-(2-methoxyethyl)-1-methylthiourea (16{5,11}).**

Prepared according to the representative procedure for the formation of thioureas. Purification: EtOAc/MeOH (65 : 35) with 1%  $\text{Et}_3\text{N}$ . Yield: 65% (43 mg yellow oil). Data:  $^1\text{H}$  NMR (400 MHz)  $\delta$  7.07 (d,  $J = 8.4$  Hz, 1 H), 6.82 (dd,  $J = 8.4, 2.4$  Hz, 1 H), 6.68 (d,  $J = 2.4$  Hz, 1 H), 6.58-6.53 (m, 1 H), 6.00-5.96 (m, 1 H), 4.64-4.55 (comp, 2 H), 4.13-4.06 (comp, 2 H), 3.91-3.78 (comp, 2 H), 3.55-3.53 (m, 2 H), 3.35 (s, 3 H), 3.20-3.17 (comp, 4 H), 3.08-3.02 (m, 1 H), 2.85 (s, 3 H), 2.82-2.75 (comp, 3 H), 2.62-2.58 (comp, 5 H), 2.37 (s, 3 H), 1.52 (ddd,  $J = 8.4, 6.4, 3.2$  Hz, 1 H), 1.43 (d,  $J = 6.4$  Hz, 3 H); LCMS purity: 97%.

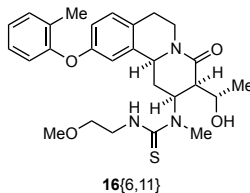

**1-(3-(1-Hydroxyethyl)-4-oxo-10-(*o*-tolyloxy)-2,3,4,6,7,11b-hexahydro-1H-pyrido[2,1-a]isoquinolin-2-yl)-3-(2-methoxyethyl)-1-methylthiourea (16{6,11}).** Prepared according to the representative procedure for the formation of thioureas. Purification: EtOAc/MeOH (95 : 5). Yield: 87% (34 mg yellow solid). Data:  $^1\text{H}$  NMR (400 MHz)  $\delta$  7.27-7.25 (m, 1 H), 7.20-7.16 (m, 1 H), 7.12-7.05 (comp, 2 H), 6.87 (dd,  $J = 8.0, 1.2$  Hz, 1 H), 6.78 (dd,  $J = 8.0, 2.0$  Hz, 1 H), 6.67 (d,  $J = 2.0$  Hz, 1 H), 6.52-6.46 (m, 1 H), 6.04-6.00 (m, 1 H), 4.65 (ddd,  $J = 13.2, 4.4, 4.4$  Hz, 1 H), 4.54 (dd,  $J = 12.0, 3.6$  Hz, 1 H), 4.09-4.03 (comp, 2 H), 3.91-3.77 (comp, 2 H), 3.54-3.55 (comp, 2 H), 3.35 (s, 3 H), 3.10-3.03 (m, 1 H), 2.86 (s, 3 H), 2.83-2.79 (comp, 2 H), 2.68 (ddd,  $J$



= 14.4, 10.4, 4.0 Hz, 1 H), 2.60-2.56 (m, 1 H), 2.22 (s, 3 H), 1.53 (ddd,  $J = 12.4, 10.4, 6.4$  Hz, 1 H), 1.42 (d,  $J = 6.4$  Hz, 3 H); LCMS purity: 91%.

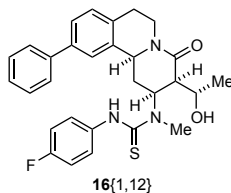

**3-(4-Fluorophenyl)-1-(3-(1-hydroxyethyl)-4-oxo-10-phenyl-2,3,4,6,7,11b-hexahydro-1H-pyrido[2,1-a]isoquinolin-2-yl)-1-methylthiourea (16{1,12}).** Prepared according to the representative procedure for the formation of thioureas. Purification: pentane/EtOAc (2 : 8). Yield: 75% (33 mg yellow solid). Data:  $^1\text{H}$  NMR (400 MHz)  $\delta$  7.56-7.53 (comp, 2 H), 7.48-7.42 (comp, 3 H), 7.38-7.34 (comp, 2 H), 7.27 (d,  $J = 8.0$  Hz, 1 H), 7.24-7.22 (comp, 2 H), 7.02-6.97 (comp, 2 H), 6.35 (br s, 1 H), 4.75-4.65 (comp, 2 H), 4.24-4.18 (m, 1 H), 4.07-4.03 (m, 1 H), 3.16-3.09 (m, 1 H), 3.04 (s, 3 H), 2.94-2.82 (comp, 3 H), 2.69-2.66 (m, 1 H), 1.68 (ddd,  $J = 14.4, 12.4, 6.4$  Hz, 1 H), 1.47 (d,  $J = 6.0$  Hz, 3 H); LCMS purity: 96%.

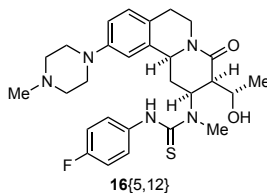

**3-(4-Fluorophenyl)-1-(3-(1-hydroxyethyl)-10-(4-methylpiperazin-1-yl)-4-oxo-2,3,4,6,7,11b-hexahydro-1H-pyrido[2,1-a]isoquinolin-2-yl)-1-methylthiourea (16{5,12}).** Prepared according to the representative procedure for the formation of thioureas. Purification: EtOAc/MeOH (60 : 40) with 1% Et<sub>3</sub>N. Yield: 74% (31 mg yellow solid). Data: mp 194-195 °C;  $^1\text{H}$  NMR (600 MHz)  $\delta$  7.43 (br s, 1 H), 7.26-7.21 (comp, 2 H), 7.09 (d,  $J = 8.4$  Hz, 1 H), 7.06-7.00 (comp, 2 H), 6.83 (dd,  $J = 8.4, 2.4$  Hz, 1 H), 6.69 (d,  $J = 2.4$  Hz, 1 H), 6.41 (br s, 1 H), 4.65 (ddd,  $J = 12.6, 4.2, 4.2$  Hz, 1 H), 4.57 (dd,  $J = 12.0, 3.6$  Hz, 1 H), 4.29-4.25 (m, 1 H), 3.20-3.18 (comp, 4 H), 3.08-3.03 (m, 1 H), 3.03 (s, 3 H), 2.87-2.77 (comp, 3 H), 2.65-2.59 (comp, 6 H), 2.37 (s, 3 H), 1.61 (ddd,  $J = 14.4, 12.0, 6.0$  Hz, 1 H), 1.46 (d,  $J = 6.0$  Hz, 3 H);  $^{13}\text{C}$  NMR (150 MHz)  $\delta$  181.9, 171.6, 160.8 ( $J_{\text{C-F}} = 245.4$  Hz), 150.5, 135.5, 135.2, 129.4, 127.9, 127.3 ( $J_{\text{C-F}} = 8.6$  Hz), 125.5, 115.5 ( $J_{\text{C-F}} = 22.7$  Hz), 115.4, 113.5, 65.4, 64.3, 55.0, 53.5, 49.2, 46.0, 38.6, 37.7, 33.1, 28.4, 21.0; IR (neat) 3270, 2935, 1652, 1426, 1247, 1098, 733  $\text{cm}^{-1}$ ; mass spectrum (CI)  $m/z$  526.2640 [C<sub>28</sub>H<sub>37</sub>FN<sub>5</sub>O<sub>2</sub>S (M+1) requires 526.2652]; LCMS purity: 95%.

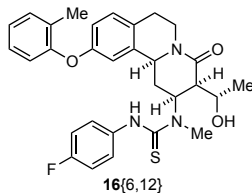

**3-(4-Fluorophenyl)-1-(3-(1-hydroxyethyl)-4-oxo-10-(*o*-tolylxy)-2,3,4,6,7,11*b*-hexahydro-1*H*-pyrido[2,1-*a*]isoquinolin-2-yl)-1-methylthiourea (16{6,12}).** Prepared according to the representative procedure for the formation of thioureas. Purification: pentane/EtOAc (20 : 80). Yield: 68% (38 mg yellow solid). Data: mp 115-117 °C; <sup>1</sup>H NMR (600 MHz) δ 7.43 (br s, 1 H), 7.27-7.15 (comp, 4 H), 7.12 (d, *J* = 8.4 Hz, 1 H), 7.11-7.00 (comp, 3 H), 6.88 (dd, *J* = 8.4, 1.2 Hz, 1 H), 6.79 (dd, *J* = 7.8, 2.4 Hz, 1 H), 6.69 (d, *J* = 3.0 Hz, 1 H), 4.67 (ddd, *J* = 13.2, 4.2, 4.2 Hz, 1 H), 4.55 (dd, *J* = 12.0, 3.6 Hz, 1 H), 4.27-4.22 (m, 1 H), 3.81 (br s, 1 H), 3.10-3.03 (m, 1 H), 3.04 (s, 3 H), 2.85-2.83 (comp, 2 H), 2.74 (ddd, *J* = 13.8, 9.6, 3.6 Hz, 1 H), 2.62-2.60 (m, 1 H), 2.23 (s, 3 H), 1.64-1.59 (comp, 2 H), 1.45 (d, *J* = 6.6 Hz, 3 H); <sup>13</sup>C NMR (150 MHz) δ 183.8, 171.5, 160.8 (*J*<sub>C-F</sub> = 244.2 Hz), 157.1, 154.4, 136.0, 135.5, 131.7, 130.1, 130.0, 128.3, 127.9, 127.3, 124.4, 119.8, 116.4, 115.5 (*J*<sub>C-F</sub> = 22.7 Hz), 114.6, 65.4, 53.7, 53.2, 50.2, 38.5, 37.5, 33.1, 28.6, 21.1, 16.2; LCMS purity: 94%.

**Representative procedure for the formation of 17{7} and 17{8} via Suzuki cross-coupling:**

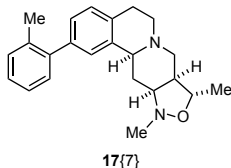

**8,10-Dimethyl-2-*o*-tolyl-5,6,7*a*,8,10,10*a*,11,11*a*-octahydro-7*H*-9-oxa-6*a*,10-diazacyclopenta[*b*]phenanthrene (17{7}).** A mixture of bromide **11** (50 mg, 0.15 mmol), cesium fluoride (91 mg, 0.59 mmol), 2-methylbenzeneboronic acid (**12{7}**) (41 mg, 0.30 mmol), and [PdCl<sub>2</sub>(dppf)]·CH<sub>2</sub>Cl<sub>2</sub> (6.0 mg, 0.01 mmol) in degassed toluene (1 mL) was heated under reflux for 24 h. The reaction was cooled to room temperature and partitioned between EtOAc (3 mL) and H<sub>2</sub>O (3 mL), and the layers were separated. The aqueous layer was extracted with EtOAc (2 × 3 mL), and the combined organic layers were dried (Na<sub>2</sub>SO<sub>4</sub>), filtered, and concentrated under reduced pressure. The resultant brown residue was purified by flash column chromatography eluting with EtOAc to give 49 mg (95%) of **17{7}** as a tan solid: mp 151-152 °C; <sup>1</sup>H NMR (400 MHz) δ 7.26-7.09 (comp, 7 H), 4.38-4.31 (m, 1 H), 3.30-3.13 (comp, 3 H), 3.02-2.98 (m, 1H),

2.91 (ddd,  $J = 11.2, 5.6, 1.6$  Hz, 1 H), 2.75 (s, 3 H), 2.75-2.70 (m, 1 H), 2.67 (dd,  $J = 12.2, 4.0$  Hz, 1 H), 2.52 (ddd,  $J = 11.6, 11.6, 3.2$  Hz, 1 H), 2.53-2.43 (comp, 2 H), 2.26 (s, 3 H), 1.79-1.70 (m, 1 H), 1.38 (d,  $J = 5.6$  Hz, 3 H);  $^{13}\text{C}$  NMR (100 MHz)  $\delta$  141.9, 139.5, 137.3, 135.4, 133.2, 130.3, 129.8, 128.5, 127.1, 126.9, 126.1, 125.7, 77.0, 65.9, 60.6, 54.2, 52.0, 47.4, 46.1, 35.1, 29.5, 21.4, 20.6; IR (neat) 2919, 2755, 1482, 1459, 911, 759, 730  $\text{cm}^{-1}$ ; mass spectrum (ESI)  $m/z$  349.2273 [ $\text{C}_{23}\text{H}_{29}\text{N}_2\text{O}$  (M+1) requires 349.2280]; LCMS purity: 100%.

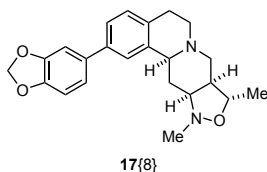

**2-Benzo[1,3]dioxol-5-yl-8,10-dimethyl-5,6,7a,8,10,10a,11,11a-octahydro-7H-9-oxa-6a,10-diaza-cyclopenta[b]phenanthrene (17{8}).** Prepared according to the representative procedure for the formation of 17{7} and 17{8} via Suzuki cross-coupling. Purification: EtOAc. Yield: 82% (366 mg tan solid). Data: : mp 188-189 °C;  $^1\text{H}$  NMR (400 MHz)  $\delta$  7.34-7.33 (m, 1 H), 7.28 (dd,  $J = 8.0, 1.6$  Hz, 1 H), 7.12 (d,  $J = 8.0$  Hz, 1 H), 7.02-6.99 (comp, 2 H), 6.85 (d,  $J = 8.0$  Hz, 1 H), 5.98 (s, 2 H), 4.37-4.30 (m, 1 H), 3.32-3.22 (m, 1 H), 3.18-3.09 (comp, 2 H), 2.99 (d,  $J = 11.6$  Hz, 1 H), 2.89 (dd,  $J = 11.6, 4.8$  Hz, 1 H), 2.77 (s, 3 H), 2.76-2.71 (m, 1 H), 2.67 (ddd,  $J = 12.4, 12.4, 4.0$  Hz, 1 H), 2.60-2.44 (comp, 3 H), 1.81-1.72 (m, 1 H), 1.39 (d,  $J = 5.6$  Hz, 3 H);  $^{13}\text{C}$  NMR (100 MHz)  $\delta$  148.1, 146.9, 138.7, 137.9, 135.7, 133.5, 129.2, 124.7, 123.7, 120.4, 108.5, 107.6, 101.1, 77.3, 65.9, 60.6, 54.2, 52.0, 47.4, 46.0, 35.0, 29.4, 21.4; IR (neat) 2960, 2915, 2825, 2766, 1485, 1230  $\text{cm}^{-1}$ ; mass spectrum (ESI)  $m/z$  379.2019 [ $\text{C}_{23}\text{H}_{27}\text{N}_2\text{O}_3$  (M+1) requires 379.2022]; LCMS purity: 96%.

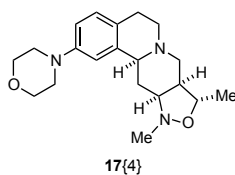

**8,10-Dimethyl-2-morpholin-4-yl-5,6,7a,8,10,10a,11,11a-octahydro-7H-9-oxa-6a,10-diaza-cyclopenta[b]phenanthrene (17{4}).** A suspension of ( $\pm$ )-BINAP (69 mg, 0.11 mmol) in toluene (6.0 mL) was heated at 80 °C until a homogeneous solution was observed (~5 min). The reaction was cooled to room temperature, whereupon  $\text{Pd}(\text{OAc})_2$  (20 mg, 0.09 mmol) was added. The reaction was stirred for 1 min at room temperature. The catalyst solution was added to a solution of bromide **11** (300 mg, 0.89 mmol), morpholine (**12{4}**) (117 mg, 0.12 mL, 1.34

mmol), and Cs<sub>2</sub>CO<sub>3</sub> (580 mg, 1.78 mmol) in toluene (7 mL). The reaction mixture was heated at 100 °C and for 6 h, whereupon H<sub>2</sub>O (13 mL) and EtOAc (13 mL) were added. The mixture was filtered through a pad of Celite, layers were separated. The aqueous layer was extracted with EtOAc (3 × 13 mL), and the combined organic layers were washed with brine, dried (Na<sub>2</sub>SO<sub>4</sub>), filtered, and concentrated under reduced pressure. The residue was purified by flash column chromatography eluting with CH<sub>2</sub>Cl<sub>2</sub>/MeOH (20 : 1) to give 248 mg (81%) of **17**{4} as a light brown solid: mp 159-160 °C; <sup>1</sup>H NMR (400 MHz) δ 6.98 (d, *J* = 8.0 Hz, 1 H), 6.74-6.71 (comp, 2 H), 4.33-4.27 (m, 1 H), 3.83-3.81 (comp, 4 H), 3.28-3.20 (m, 1 H), 3.08-2.95 (comp, 7 H), 2.85 (dd, *J* = 10.8, 5.2 Hz, 1 H), 2.74 (s, 3 H), 2.64-2.55 (comp, 2 H), 2.50-2.39 (comp, 3 H), 1.74-1.65 (m, 1 H), 1.36 (d, *J* = 5.6 Hz, 3 H); <sup>13</sup>C NMR (100 MHz) δ 149.6, 138.1, 129.4, 126.5, 114.7, 112.5, 77.0, 66.9, 65.9, 60.8, 54.2, 52.2, 50.0, 47.4, 45.9, 35.1, 28.8, 21.4; IR (neat) 3400, 2960, 2916, 2854, 2817, 2755, 1613, 1509 cm<sup>-1</sup>; mass spectrum (ESI) *m/z* 344.2333 [C<sub>20</sub>H<sub>30</sub>N<sub>3</sub>O<sub>2</sub> (M+1) requires 344.2338]; LCMS purity: 100%.

**Representative procedure for the formation of **18**{7}, **18**{8}, and **18**{4} via *N,O*-bond cleavage:**

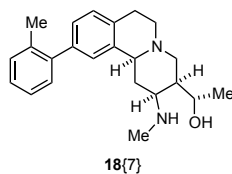

**1-(2-(Methylamino)-10-*o*-tolyl-2,3,4,6,7,11*b*-hexahydro-1*H*-pyrido[2,1-*a*]isoquinolin-3-yl)ethanol (**18**{7}).** Sodium borohydride (33 mg, 0.86 mmol) was added to a solution of isoxazolidine **11** (50 mg, 0.14 mmol) and NiCl<sub>2</sub>·6H<sub>2</sub>O (72 mg, 0.29 mmol) in anhydrous MeOH (2.9 mL), and the reaction was stirred for 5 h at room temperature. The solvent was removed in vacuo, and the black residue was partitioned between concentrated NH<sub>4</sub>OH (28 mL) and CH<sub>2</sub>Cl<sub>2</sub> (28 mL) and stirred for 12 h at room temperature. The layers were separated, and the aqueous layer was extracted with CH<sub>2</sub>Cl<sub>2</sub> (2 × 10 mL). The combined organic layers were dried (Na<sub>2</sub>SO<sub>4</sub>), filtered, and concentrated under reduced pressure. The resultant yellow oil was purified by flash column chromatography eluting with EtOAc/MeOH (5 : 1) with 1% Et<sub>3</sub>N to give 45 mg (90%) of **18**{7} as a clear gum: <sup>1</sup>H NMR (400 MHz) δ 7.26-7.12 (comp, 7 H), 4.49-4.42 (m, 1 H), 3.24 (d, *J* = 10.4 Hz, 1 H), 3.16 (ddd, *J* = 18.0, 12.0, 6.4 Hz, 1 H), 2.96 (dd, *J* = 12.0, 6.4 Hz, 1 H), 2.97-2.92 (m, 1 H), 2.90-2.85 (m, 1 H), 2.72 (dd, *J* = 16.0, 3.2 Hz, 1 H), 2.53

(s, 3 H), 2.46 (ddd,  $J = 12.0, 12.0, 4.0$  Hz, 1 H), 2.34-2.28 (comp, 2 H), 2.27 (s, 3 H), 1.95-1.83 (comp, 2 H), 1.23 (d,  $J = 6.0$  Hz, 3 H);  $^{13}\text{C}$  NMR (100 MHz)  $\delta$  141.9, 139.4, 137.4, 135.4, 133.2, 130.3, 129.8, 128.6, 127.2, 127.0, 125.7, 125.2, 67.0, 62.9, 62.5, 57.7, 52.6, 41.9, 34.3, 33.8, 29.5, 21.4, 20.6; IR (neat) 3200, 2926, 2802, 1482, 1118, 910, 760, 731  $\text{cm}^{-1}$ ; mass spectrum (ESI)  $m/z$  351.2431 [ $\text{C}_{23}\text{H}_{31}\text{N}_2\text{O}$  (M+1) requires 351.2436]; LCMS purity: 99%.

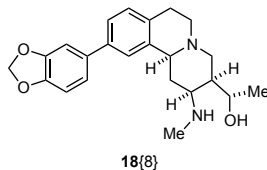

**1-(10-(Benzo[*d*][1,3]dioxol-5-yl)-2-(methylamino)-2,3,4,6,7,11*b*-hexahydro-1*H*-pyrido[2,1-*a*]isoquinolin-3-yl)ethanol (18{8}).** Prepared according to the representative procedure for the formation of 18{7}, 18{8}, and 18{4} via *N,O*-bond cleavage. Purification: EtOAc/MeOH (5 : 1) with 1%  $\text{Et}_3\text{N}$ . Yield: 84% (80 mg colorless foam). Data:  $^1\text{H}$  NMR (400 MHz)  $\delta$  7.33-7.27 (comp, 2 H), 7.13 (d,  $J = 8.0$  Hz, 1 H), 7.03-6.99 (comp, 2 H), 6.86 (d,  $J = 7.6$  Hz, 1 H), 5.99 (s, 2 H), 4.47-4.40 (m, 1 H), 3.25-3.22 (m, 1 H), 3.17-3.09 (m, 1 H), 2.98-2.91 (comp, 2 H), 2.86 (dd,  $J = 11.6, 5.6$  Hz, 1 H), 2.70 (dd,  $J = 16.4, 2.8$  Hz, 1 H), 2.54 (s, 3 H), 2.43 (ddd,  $J = 11.6, 11.6, 3.6$  Hz, 1 H), 2.35-2.30 (comp, 2 H), 1.96-1.87 (m, 1 H), 1.82-1.78 (comp, 2 H), 1.21 (d,  $J = 6.0$  Hz, 3 H); LCMS purity: 100%.

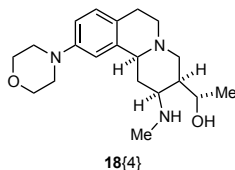

**1-(2-(Methylamino)-10-morpholino-2,3,4,6,7,11*b*-hexahydro-1*H*-pyrido[2,1-*a*]isoquinolin-3-yl)ethanol (18{4}).** Prepared according to the representative procedure for the formation of 18{7}, 18{8}, and 18{4} via *N,O*-bond cleavage. Purification:  $\text{CH}_2\text{Cl}_2/\text{MeOH}$  (5 : 1) with 1%  $\text{Et}_3\text{N}$ . Yield: 90% (286 mg colorless powder). Data: mp 157-158  $^\circ\text{C}$ ;  $^1\text{H}$  NMR (400 MHz,  $\text{CD}_3\text{OD}$ )  $\delta$  6.97 (d,  $J = 8.4$  Hz, 1 H), 6.82 (d,  $J = 2.8$  Hz, 1 H), 6.80 (dd,  $J = 8.4, 2.8$  Hz, 1 H), 4.48-4.41 (m, 1 H), 3.83-3.80 (comp, 4 H), 3.17-3.14 (m, 1 H), 3.09-3.06 (comp, 4 H), 3.04-2.84 (comp, 4 H), 2.58 (dd,  $J = 15.6, 3.2$  Hz, 1 H), 2.47 (s, 3 H), 2.45-2.30 (comp, 3 H), 1.82-1.80 (m, 1 H), 1.74-1.65 (m, 1 H), 1.20 (d,  $J = 6.0$  Hz, 3 H);  $^{13}\text{C}$  NMR (100 MHz,  $\text{CD}_3\text{OD}$ )  $\delta$  149.7, 137.9, 129.0, 126.4, 114.7, 111.9, 67.4, 66.6, 62.9, 62.7, 57.1, 52.5, 50.0, 41.1, 33.4, 33.0,

28.4, 20.4; IR (neat) 3434, 2958, 2801, 2530, 1612, 1507, 1450, 1119  $\text{cm}^{-1}$ ; mass spectrum (ESI)  $m/z$  346.2489 [ $\text{C}_{20}\text{H}_{32}\text{N}_3\text{O}_2$  ( $\text{M}+1$ ) requires 346.2489]; LCMS purity: 100%.

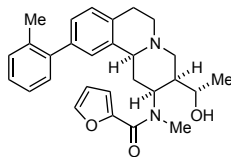

19{7,3}

***N*-(3-(1-Hydroxyethyl)-10-*o*-tolyl-2,3,4,6,7,11*b*-hexahydro-1*H*-pyrido[2,1-*a*]isoquinolin-2-yl)-*N*-methylfuran-2-carboxamide (19{7,3})**. Prepared according to the representative procedure for the formation of amides. Purification: hexanes/EtOAc (1 : 1  $\rightarrow$  1 : 2). Yield: 77% (21 mg yellow oil). Data:  $^1\text{H}$  NMR (400 MHz)  $\delta$  7.49 (dd,  $J = 1.6, 0.8$  Hz, 1 H), 7.27-7.14 (comp, 7 H), 6.97 (d,  $J = 3.2$  Hz, 1 H), 6.48 (dd,  $J = 3.2, 1.6$  Hz, 1 H), 4.74 (ddd,  $J = 12.8, 4.8, 4.8$  Hz, 1 H), 4.36-4.25 (m, 1 H), 3.47 (d,  $J = 9.6$  Hz, 1 H), 3.33 (s, 3 H), 3.23-3.16 (m, 1 H), 3.07-2.97 (comp, 2 H), 2.85 (dd,  $J = 11.4, 2.4$  Hz, 1 H), 2.80-2.76 (m, 1 H), 2.58 (ddd,  $J = 12.0, 11.4, 3.2$  Hz, 1 H), 2.53-2.32 (comp, 3 H), 2.28 (s, 3 H), 1.25 (d,  $J = 7.2$  Hz, 3 H);  $^{13}\text{C}$  NMR (100 MHz)  $\delta$  161.0, 148.3, 143.8, 141.7, 139.7, 136.8, 135.4, 132.7, 130.4, 129.8, 128.6, 127.4, 127.3, 125.8, 125.5, 116.0, 111.1, 77.2, 73.3, 63.3, 62.7, 56.2, 52.3, 33.6, 33.4, 29.6, 21.3, 20.6; IR (neat) 3395, 2928, 1613, 1485, 1073, 909, 758, 731  $\text{cm}^{-1}$ ; mass spectrum (ESI)  $m/z$  445.2486 [ $\text{C}_{28}\text{H}_{33}\text{N}_2\text{O}_3$  ( $\text{M}+1$ ) requires 445.2491]; LCMS purity: 82%.

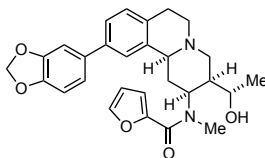

19{8,3}

***N*-(10-(benzo[*d*][1,3]dioxol-5-yl)-3-(1-hydroxyethyl)-2,3,4,6,7,11*b*-hexahydro-1*H*-pyrido[2,1-*a*]isoquinolin-2-yl)-*N*-methylfuran-2-carboxamide (19{8,3})**. Prepared according to the representative procedure for the formation of amides. Purification: hexanes/EtOAc (1 : 3). Yield: 67% (32 mg yellow oil). Data:  $^1\text{H}$  NMR (400 MHz)  $\delta$  7.51 (dd,  $J = 1.6, 0.8$  Hz, 1 H), 7.36-7.31 (comp, 2 H), 7.16 (d,  $J = 7.6$  Hz, 1 H), 7.03-6.99 (comp, 3 H), 6.87 (d,  $J = 7.6$  Hz, 1 H), 6.49 (dd,  $J = 3.6, 2.0$  Hz, 1 H), 5.99 (s, 2 H), 4.80-4.74 (m, 1 H), 4.33-4.27 (m, 1 H), 3.48-3.44 (m, 1 H), 3.35 (s, 3 H), 3.21-3.12 (m, 1 H), 3.05-2.98 (comp, 2 H), 2.85 (dd,  $J = 11.6, 2.8$  Hz, 1 H), 2.77-2.73 (m, 1 H), 2.54 (ddd,  $J = 11.6, 11.6, 3.2$  Hz, 1 H), 2.50-2.37 (comp, 3 H), 1.25 (d,  $J = 6.8$  Hz, 3 H); LCMS purity: 97%.

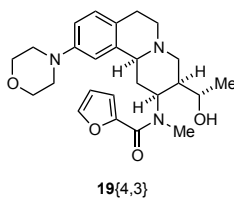

***N*-(3-(1-Hydroxyethyl)-10-morpholino-2,3,4,6,7,11*b*-hexahydro-1*H*-pyrido[2,1-*a*]isoquinolin-2-yl)-*N*-methylfuran-2-carboxamide (19{4,3}).** Prepared according to the representative procedure for the formation of amides. Purification: hexanes/EtOAc (1 : 2 → 0 : 100). Yield: 99% (32 mg yellow solid). Data: <sup>1</sup>H NMR (400 MHz) δ 7.51 (dd, *J* = 2.0, 0.8 Hz, 1 H), 7.04 (d, *J* = 8.4 Hz, 1 H), 7.00 (d, *J* = 3.2 Hz, 1 H), 6.80-6.78 (m, 1 H), 6.72-6.71 (m, 1 H), 6.49 (dd, *J* = 3.6, 2.0 Hz, 1 H), 4.79-4.70 (m, 1 H), 4.32-4.28 (m, 1 H), 3.87-3.85 (comp, 4 H), 3.37-3.34 (comp, 4 H), 3.16-2.91 (comp, 7 H), 2.88-2.79 (m, 1 H), 2.67-2.63 (m, 1 H), 2.53-2.30 (comp, 4 H), 1.24 (d, *J* = 6.8 Hz, 3 H); LCMS purity: 99%.

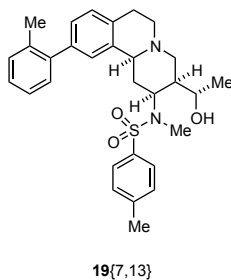

***N*-(3-(1-Hydroxyethyl)-10-*o*-tolyl-2,3,4,6,7,11*b*-hexahydro-1*H*-pyrido[2,1-*a*]isoquinolin-2-yl)-*N*,4-dimethylbenzenesulfonamide (19{7,13}).** Prepared according to the representative procedure for the formation of sulfonamides. Purification: hexanes/EtOAc (2 : 1). Yield: 62% (24 mg tan oil). Data: <sup>1</sup>H NMR (400 MHz) δ 7.73 (d, *J* = 8.4 Hz, 2 H), 7.30 (d, *J* = 8.4 Hz, 2 H), 7.28-7.21 (comp, 3 H), 7.14 (dd, *J* = 6.4, 2.0 Hz, 1 H), 7.11-7.08 (comp, 2 H), 6.71-6.70 (m, 1 H), 4.34-4.28 (m, 1 H), 4.15 (ddd, *J* = 12.8, 4.8, 4.8 Hz, 1 H), 3.24-3.21 (m, 1 H), 3.12 (ddd, *J* = 17.2, 12.4, 6.0 Hz, 1 H), 3.02 (dd, *J* = 12.0, 2.4 Hz, 1 H), 2.96 (dd, *J* = 11.2, 4.8 Hz, 1 H), 2.92 (s, 3 H), 2.76-2.74 (m, 1 H), 2.72 (dd, *J* = 12.0, 3.2 Hz, 1 H), 2.49 (ddd, *J* = 12.0, 12.0, 3.6 Hz, 1 H), 2.32 (s, 3 H), 2.19 (s, 3 H), 2.11-2.00 (comp, 2 H), 1.65 (ddd, *J* = 12.4, 4.0, 4.0 Hz, 1 H), 1.38 (d, *J* = 6.8 Hz, 3 H); <sup>13</sup>C NMR (100 MHz) δ 143.5, 141.7, 139.5, 136.4, 135.5, 135.3, 132.7, 130.4, 129.8, 129.7, 128.6, 127.3, 127.2, 127.1, 125.8, 125.2, 72.8, 63.1, 62.6, 57.7, 52.1, 45.0, 32.6, 32.1, 29.6, 21.5, 21.4, 20.5; IR (neat) 3384, 2926, 2814, 2755, 2250, 1482 1338, 1164 cm<sup>-1</sup>; mass spectrum (ESI) *m/z* 505.2520 [C<sub>30</sub>H<sub>37</sub>N<sub>2</sub>O<sub>3</sub>S (M+1) requires 505.2519]; LCMS purity: 97%.

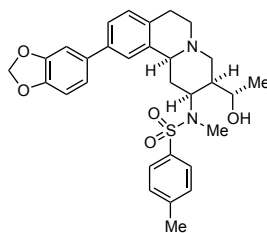

19{8,13}

***N*-(10-(Benzo[*d*][1,3]dioxol-5-yl)-3-(1-hydroxyethyl)-2,3,4,6,7,11*b*-hexahydro-1*H*-pyrido[2,1-*a*]isoquinolin-2-yl)-*N*,4-dimethylbenzenesulfonamide (19{8,13}).** Prepared according to the representative procedure for the formation of sulfonamides. Purification: hexanes/EtOAc (3 : 2). Yield: 55% (19 mg colorless solid). Data:  $^1\text{H}$  NMR (400 MHz)  $\delta$  7.76 (d,  $J = 8.4$  Hz, 2 H), 7.35 (d,  $J = 8.4$  Hz, 2 H), 7.26 (dd,  $J = 8.0, 1.6$  Hz, 1 H), 7.09 (d,  $J = 8.0$  Hz, 1 H), 6.91-6.81 (comp, 4 H), 5.99 (s, 2 H), 4.30-4.24 (m, 1 H), 4.17 (ddd,  $J = 12.8, 4.8$  Hz, 1 H), 3.22-3.17 (m, 1 H), 3.07 (ddd,  $J = 17.2, 12.0, 5.6$  Hz, 1 H), 3.00 (dd,  $J = 11.8, 2.4$  Hz, 1 H), 2.94-2.90 (m, 1 H), 2.92 (s, 3 H), 2.17-2.64 (comp, 2 H), 2.44 (ddd,  $J = 12.0, 12.0, 3.6$  Hz, 1 H), 2.41 (s, 3 H), 2.07-1.97 (comp, 2 H), 1.67 (ddd,  $J = 12.4, 4.0, 4.0$  Hz, 1 H), 1.34 (d,  $J = 6.8$  Hz, 3 H); LCMS purity: 99%.

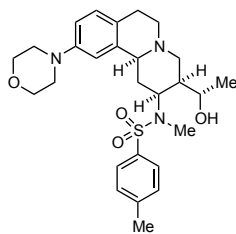

19{4,13}

***N*-(3-(1-Hydroxyethyl)-10-morpholino-2,3,4,6,7,11*b*-hexahydro-1*H*-pyrido[2,1-*a*]isoquinolin-2-yl)-*N*,4-dimethylbenzenesulfonamide (19{4,13}).** Prepared according to the representative procedure for the formation of sulfonamides. Purification: hexanes/EtOAc (1 : 1). Yield: 73% (26 mg yellow oil). Data:  $^1\text{H}$  NMR (400 MHz)  $\delta$  7.78 (d,  $J = 8.4$  Hz, 2 H), 7.35 (d,  $J = 8.4$  Hz, 2 H), 6.98 (d,  $J = 8.4$  Hz, 1 H), 6.73 (dd,  $J = 8.4, 2.4$  Hz, 1 H), 6.31 (d,  $J = 2.4$  Hz, 1 H), 4.31-4.19 (comp, 2 H), 3.95-3.80 (comp, 4 H), 3.17-3.14 (m, 1 H), 3.05-2.95 (comp, 5 H), 2.94 (s, 3 H), 2.91-2.87 (m, 1 H), 2.67 (dd,  $J = 12.0, 3.2$  Hz, 1 H), 2.58 (dd,  $J = 16.0, 2.8$  Hz, 1 H), 2.45 (s, 3 H), 2.43-2.36 (m, 1 H), 2.07-1.98 (comp, 2 H), 1.69 (ddd,  $J = 12.4, 4.0, 4.0$  Hz, 1 H), 1.31 (d,  $J = 6.8$  Hz, 3 H); LCMS purity: 96%.



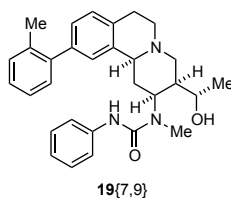

**1-(3-(1-Hydroxyethyl)-10-*o*-tolyl-2,3,4,6,7,11*b*-hexahydro-1*H*-pyrido[2,1-*a*]isoquinolin-2-yl)-1-methyl-3-phenylurea (19{7,9})**. Prepared according to the representative procedure for the formation of ureas. Purification: hexanes/EtOAc (10 : 1 → 1 : 1). Yield: 55% (18 mg yellow oil). Data: <sup>1</sup>H NMR (400 MHz) δ 7.33 (d, *J* = 8.8 Hz, 2 H), 7.24-7.03 (comp, 9 H), 6.98-6.94 (m, 1 H), 6.48 (br s, 1 H), 4.56-4.47 (m, 1 H), 4.26-4.16 (m, 1 H), 3.44-3.34 (m, 1 H), 3.19-3.06 (m, 1 H), 3.03 (s, 3 H), 2.99-2.90 (comp, 2 H), 2.77-2.65 (comp, 2 H), 2.56-2.45 (m, 1 H), 2.35-2.25 (comp, 2 H), 2.20 (s, 3 H), 2.19-2.12 (m, 1 H), 1.21 (d, *J* = 6.8 Hz, 3 H); LCMS purity: 99%.

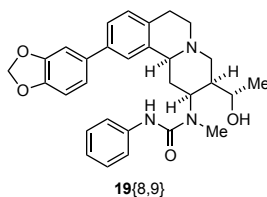

**1-(10-(Benzo[*d*][1,3]dioxol-5-yl)-3-(1-hydroxyethyl)-2,3,4,6,7,11*b*-hexahydro-1*H*-pyrido[2,1-*a*]isoquinolin-2-yl)-1-methyl-3-phenylurea (19{8,9})**. Prepared according to the representative procedure for the formation of ureas. Purification: CH<sub>2</sub>Cl<sub>2</sub>/MeOH (98 : 2). Yield: 70% (23 mg colorless oil). Data: <sup>1</sup>H NMR (400 MHz) δ 7.43-7.40 (comp, 2 H), 7.34-7.25 (comp, 4 H), 7.16 (d, *J* = 8.0 Hz, 1 H), 7.06-7.00 (comp, 3 H), 6.87 (dd, *J* = 7.6, 0.4 Hz, 1 H), 6.62 (br s, 1 H), 5.99 (s, 2 H), 4.64-4.58 (m, 1 H), 4.31-4.23 (m, 1 H), 3.48-3.42 (m, 1 H), 3.20-3.12 (m, 1 H), 3.12 (s, 3 H), 3.05-2.95 (comp, 2 H), 2.82-2.71 (comp, 2 H), 2.52 (ddd, *J* = 11.6, 11.6, 3.2 Hz, 1 H), 2.47-2.33 (comp, 2 H), 2.24-2.18 (m, 1 H), 1.28 (d, *J* = 6.8 Hz, 3 H); LCMS purity: 99%.

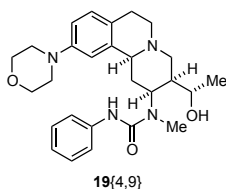

**1-(3-(1-Hydroxyethyl)-10-morpholino-2,3,4,6,7,11*b*-hexahydro-1*H*-pyrido[2,1-*a*]isoquinolin-2-yl)-1-methyl-3-phenylurea (19{4,9})**. Prepared according to the representative procedure for the formation of ureas. Purification: hexanes/EtOAc (1 : 1 → 1 : 2). Yield: 99%

(34 mg yellow oil). Data:  $^1\text{H}$  NMR (400 MHz)  $\delta$  7.43-7.40 (comp, 2 H), 7.31-7.27 (comp, 2 H), 7.06-7.01 (comp, 2 H), 6.78 (dd,  $J = 8.0, 2.4$  Hz, 1 H), 6.70 (d,  $J = 2.4$  Hz, 1 H), 6.64 (br s, 1 H), 4.60-4.55 (m, 1 H), 4.29-4.21 (m, 1 H), 3.87-3.84 (comp, 4 H), 3.40-3.35 (m, 1 H), 3.16-2.92 (comp, 10 H), 2.76 (dd,  $J = 11.6, 3.2$  Hz, 1 H), 2.66-2.61 (m, 1 H), 2.47 (ddd,  $J = 12.0, 12.0, 3.2$  Hz, 1 H), 2.37-2.32 (comp, 2 H), 2.20-2.16 (m, 1 H), 1.27 (d,  $J = 7.2$  Hz, 3 H);  $^{13}\text{C}$  NMR (100 MHz)  $\delta$  155.8, 149.9, 139.1, 137.8, 129.6, 128.9, 126.2, 123.0, 119.9, 114.8, 112.3, 72.9, 67.2, 66.9, 62.8, 55.8, 52.2, 49.9, 42.2, 34.5, 32.0, 29.1, 21.3; IR (neat) 3330, 2962, 2818, 1641, 1530, 1502, 1445  $\text{cm}^{-1}$ ; mass spectrum (ESI)  $m/z$  487.2676 [ $\text{C}_{27}\text{H}_{36}\text{N}_4\text{O}_3\text{Na}$  (M+Na) requires 487.2685]; LCMS purity: 98%.

### Representative procedure for the formation of *N,O*-acetals:

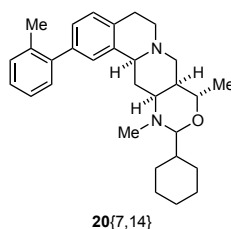

**10-Cyclohexyl-8,11-dimethyl-2-*o*-tolyl-5,7*a*,8,10,11,11*a*,12,12*a*-octahydro-6*H*,7*H*-9-oxa-6*a*,11-diaza-benzo[*a*]anthracene (20{7,14})**. A solution of amino alcohol **18{1}** (50 mg, 0.14 mmol) and cyclohexanecarboxaldehyde (**15{14}**) (18 mg, 20  $\mu\text{L}$ , 0.16 mmol) in 1,2-dichloroethane (2.0 mL) was heated under reflux for 24 h. The solvent was removed *in vacuo* and the residue was purified by flash column chromatography eluting with hexanes/EtOAc (7 : 1) to give 63 mg (99%) of **20{7,14}** as a yellow oil:  $^1\text{H}$  NMR (400 MHz)  $\delta$  7.26-7.19 (comp, 5 H), 7.14-7.12 (comp, 2 H), 4.15-4.08 (m, 1 H), 4.07 (d,  $J = 8.8$  Hz, 1 H), 3.19-3.10 (comp, 2 H), 2.99 (dd,  $J = 12.4, 2.0$  Hz, 1 H), 3.00-2.93 (m, 1 H), 2.87 (dd,  $J = 11.8, 4.8$  Hz, 1 H), 2.75-2.69 (m, 1 H), 2.46 (s, 3 H), 2.41 (ddd,  $J = 12.0, 12.0, 3.6$  Hz, 1 H), 2.32 (dd,  $J = 12.8, 4.0$  Hz, 1 H), 2.29 (s, 3 H), 2.29-2.22 (m, 1 H), 2.21-2.12 (m, 1 H), 2.10-1.91 (comp, 2 H), 1.78-0.81 (comp, 10 H), 1.26 (d,  $J = 6.0$  Hz, 3 H);  $^{13}\text{C}$  NMR (100 MHz)  $\delta$  141.8, 139.4, 137.8, 135.2, 133.0, 130.3, 129.8, 128.4, 127.1, 126.9, 125.9, 125.7, 89.7, 71.8, 63.1, 61.4, 57.4, 52.4, 38.8, 36.0, 35.0, 29.8, 29.7, 28.3, 26.5, 25.8, 20.6, 19.6; IR (neat) 2923, 2852, 1451, 1089, 1001, 758, 731  $\text{cm}^{-1}$ ; mass spectrum (ESI)  $m/z$  445.3214 [ $\text{C}_{30}\text{H}_{41}\text{N}_2\text{O}$  (M+1) requires 445.3219]; LCMS purity: 100%.

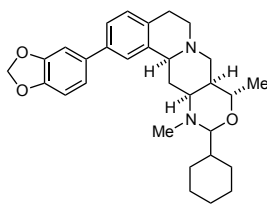

20{8,14}

**2-Benzo[1,3]dioxol-5-yl-10-cyclohexyl-8,11-dimethyl-5,7a,8,10,11,11a,12,12a-octahydro-6H,7H-9-oxa-6a,11-diaza-benzo[a]anthracene (20{8,14})**. Prepared according to the representative procedure for the formation of *N,O*-acetals. Purification: hexanes/EtOAc (10 : 1 → 5 : 1). Yield: 84% (63 mg yellow oil). Data: <sup>1</sup>H NMR (400 MHz) δ 7.39 (d, *J* = 0.8 Hz, 1 H), 7.30 (dd, *J* = 8.0, 2.0 Hz, 1 H), 7.13 (d, *J* = 8.0 Hz, 1 H), 7.05-7.01 (comp, 2 H), 6.86 (d, *J* = 7.6 Hz, 1 H), 5.99 (s, 2 H), 4.15-4.09 (m, 1 H), 4.09 (d, *J* = 8.8 Hz, 1 H), 3.18-3.12 (m, 1 H), 3.13 (ddd, *J* = 17.2, 12.4, 6.0 Hz, 1 H), 3.04-2.97 (comp, 2 H), 2.87-2.83 (m, 1 H), 2.68 (dd, *J* = 16.4, 2.4 Hz, 1 H), 2.49 (s, 3 H), 2.42-2.30 (comp, 3 H), 2.25-2.16 (m, 1 H), 2.02-1.94 (comp, 2 H), 1.77-1.58 (comp, 4 H), 1.54-1.46 (m, 1 H), 1.31-1.08 (comp, 3 H), 1.25 (d, *J* = 6.0 Hz, 3 H), 0.94-0.82 (comp, 2 H); <sup>13</sup>C NMR (100 MHz) δ 148.1, 146.9, 138.5, 138.4, 135.6, 133.4, 129.3, 124.5, 123.5, 120.4, 108.5, 107.6, 101.1, 89.7, 71.8, 63.1, 61.5, 57.4, 52.3, 38.8, 35.9, 35.0, 30.0, 29.5, 28.2, 26.5, 25.8, 19.6; IR (neat) 2923, 2852, 2807, 2752, 1483, 1229, 1040 cm<sup>-1</sup>; mass spectrum (ESI) *m/z* 475.2958 [C<sub>30</sub>H<sub>39</sub>N<sub>2</sub>O<sub>3</sub> (M+1) requires 475.2955]; LCMS purity: 99%.

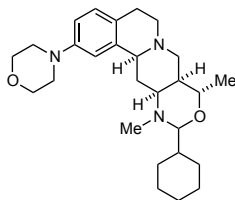

20{4,14}

**10-Cyclohexyl-8,11-dimethyl-2-morpholin-4-yl-5,7a,8,10,11,11a,12,12a-octahydro-6H,7H-9-oxa-6a,11-diaza-benzo[a]anthracene (20{4,14})**. Prepared according to the representative procedure for the formation of *N,O*-acetals. Purification: hexanes/EtOAc (3 : 1). Yield: 81% (68 mg yellow oil). Data: <sup>1</sup>H NMR (400 MHz) δ 7.00 (d, *J* = 8.0 Hz, 1 H), 6.77 (d, *J* = 2.4 Hz, 1 H), 6.74 (dd, *J* = 8.0, 2.4 Hz, 1 H), 4.13-4.07 (m, 1 H), 4.08 (d, *J* = 9.2 Hz, 1 H), 3.86-3.83 (comp, 4 H), 3.15-2.95 (comp, 7 H), 2.81 (dd, *J* = 11.6, 5.2 Hz, 1 H), 2.36-2.12 (comp, 5 H), 2.03-1.87 (comp, 3 H), 1.75-1.61 (comp, 5 H), 1.51-1.47 (m, 1 H), 1.29-1.08 (comp, 4 H), 1.24 (d, *J* = 6.0 Hz, 3 H), 0.90-0.83 (comp, 3 H); <sup>13</sup>C NMR (100 MHz) δ 149.6, 138.5, 129.5, 126.5, 114.5, 112.4, 89.6, 71.9, 66.9, 63.3, 61.6, 57.3, 52.4, 49.9, 38.8, 35.8, 35.0, 30.0, 28.9,

28.2, 26.4, 25.8, 19.5; IR (neat) 2924, 2853, 1451, 1122, 732  $\text{cm}^{-1}$ ; mass spectrum (ESI)  $m/z$  440.3273 [ $\text{C}_{27}\text{H}_{42}\text{N}_3\text{O}_2$  (M+1) requires 440.3277]; LCMS purity: 100%.

**Representative procedure for reductive amination:**

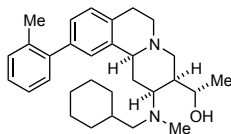

21{7,14}

**1-(2-((Cyclohexylmethyl)(methyl)amino)-10-*o*-tolyl-2,3,4,6,7,11*b*-hexahydro-1*H*-pyrido[2,1-*a*]isoquinolin-3-yl)ethanol (21{7,14}).**  $\text{NaBH}_3\text{CN}$  (7.6 mg, 0.12 mmol) was added to a solution of **20{1,14}** (36 mg, 0.08 mmol) and AcOH (7.3 mg, 6.9  $\mu\text{L}$ , 0.12 mmol) in 1,2-dichloroethane (2 mL), and the reaction was stirred for 24 h at room temperature. Saturated aqueous  $\text{NaHCO}_3$  (2 mL) was added, and the layers were separated. The aqueous layer was extracted with  $\text{CH}_2\text{Cl}_2$  ( $2 \times 2$  mL). The combined organic layers were dried ( $\text{Na}_2\text{SO}_4$ ), filtered, and concentrated under reduced pressure. The residue was purified by flash column chromatography eluting with hexanes/EtOAc (1 : 3) to give 30 mg (83%) of **21{7,14}** as a yellow oil:  $^1\text{H}$  NMR (400 MHz)  $\delta$  7.30-7.10 (comp, 7 H), 4.47-4.40 (m, 1 H), 3.21-3.15 (m, 1 H), 3.13 (d,  $J = 11.6$  Hz, 1 H), 2.97 (dd,  $J = 11.6, 3.6$  Hz, 1 H), 2.86 (dd,  $J = 11.2, 6.0$  Hz, 1 H), 2.71 (dd,  $J = 16.4, 3.2$  Hz, 1 H), 2.59-2.39 (comp, 4 H), 2.33-2.26 (comp, 3 H), 2.28 (s, 3 H), 1.96-1.48 (comp, 10 H), 1.33-1.10 (comp, 3 H), 1.22 (d,  $J = 6.0$  Hz, 3 H), 0.99-0.0.76 (comp, 2 H); IR (neat) 2924, 2860, 1117, 759, 730  $\text{cm}^{-1}$ ; mass spectrum (ESI)  $m/z$  447.3369 [ $\text{C}_{30}\text{H}_{43}\text{N}_2\text{O}$  (M+1) requires 447.3375]; LCMS purity: 97%.

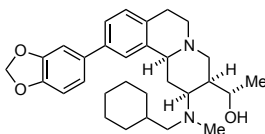

21{8,14}

**1-(10-(Benzo[*d*][1,3]dioxol-5-yl)-2-((cyclohexylmethyl)(methyl)amino)-2,3,4,6,7,11*b*-hexahydro-1*H*-pyrido[2,1-*a*]isoquinolin-3-yl)ethanol (21{8,14}).** Prepared according to the representative procedure for reductive amination. Purification:  $\text{CH}_2\text{Cl}_2/\text{MeOH}$  (95 : 5). Yield: 70% (19 mg colorless oil). Data:  $^1\text{H}$  NMR (400 MHz)  $\delta$  7.32 (d,  $J = 1.6$  Hz, 1 H), 7.29 (dd,  $J = 8.0, 1.6$  Hz, 1 H), 7.13 (d,  $J = 8.0$  Hz, 1 H), 7.04-7.01 (comp, 2 H), 6.88 (d,  $J = 8.0$  Hz, 1 H),

5.99 (s, 2 H), 4.46-4.39 (m, 1 H), 3.18-3.09 (comp, 2 H), 2.96 (dd,  $J = 11.6, 2.4$  Hz, 1 H), 2.84 (dd,  $J = 11.2, 5.2$  Hz, 1 H), 2.71-2.63 (comp, 3 H), 2.40 (ddd,  $J = 11.6, 11.6, 3.6$  Hz, 1 H), 2.32 (s, 3 H), 2.33-2.29 (m, 1 H), 1.92-1.57 (comp, 10 H), 1.25-1.13 (comp, 3 H), 1.21 (d,  $J = 5.6$  Hz, 3 H), 0.99-0.86 (comp, 2 H);  $^{13}\text{C}$  NMR (100 MHz)  $\delta$  148.0, 146.9, 138.7, 138.2, 135.9, 133.8, 129.4, 125.0, 122.9, 120.6, 108.6, 107.7, 101.1, 77.2, 67.8, 66.9, 62.9, 58.0, 52.3, 41.8, 35.6, 31.3, 29.7, 29.6, 26.6, 26.1, 21.6; IR (neat) 3200, 2925, 2851, 2797, 1483, 1229, 1040, 731  $\text{cm}^{-1}$ ; mass spectrum (ESI)  $m/z$  477.3115 [ $\text{C}_{30}\text{H}_{41}\text{N}_2\text{O}_3$  (M+1) requires 477.3112]; LCMS purity: 100%.

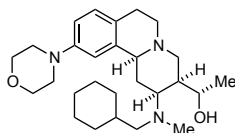

21{4,14}

**1-(2-((Cyclohexylmethyl)(methyl)amino)-10-morpholino-2,3,4,6,7,11b-hexahydro-1H-pyrido[2,1-a]isoquinolin-3-yl)ethanol (21 {4,14})**. Prepared according to the representative procedure for reductive amination. Purification: EtOAc. Yield: 64% (25 mg yellow oil). Data:  $^1\text{H}$  NMR (400 MHz)  $\delta$  7.01 (d,  $J = 8.8$  Hz, 1 H), 6.78-6.73 (comp, 2 H), 4.47-4.39 (m, 1 H), 3.88-3.86 (comp, 4 H), 3.16-2.97 (comp, 6 H), 2.94 (dd,  $J = 12.0, 2.4$  Hz, 1 H), 2.79 (dd,  $J = 10.4, 5.6$  Hz, 1 H), 2.65 (ddd,  $J = 12.8, 3.6, 3.6$  Hz, 1 H), 2.57-2.55 (m, 1 H), 2.49-2.46 (comp, 2 H), 2.39 (s, 3 H), 2.38-2.27 (comp, 2 H), 1.96-1.90 (m, 1 H), 1.90-1.56 (comp, 8 H), 1.21 (d,  $J = 6.0$  Hz, 3 H), 1.02-0.81 (comp, 4 H); LCMS purity: 98%.

### Lipinski's Rule Data:

| Compound # | Molecular Weight | Clog P | H-bond donors | H-bond acceptors | Lipinski Rule of 5 |
|------------|------------------|--------|---------------|------------------|--------------------|
| 10         | 351.24           | 1.9    | 0             | 3                | Satisfied          |
| 11         | 337.26           | 2.66   | 0             | 3                | Satisfied          |
| 13{1}      | 348.44           | 2.78   | 0             | 3                | Satisfied          |
| 13{2}      | 378.46           | 2.62   | 0             | 4                | Satisfied          |
| 13{3}      | 366.43           | 2.92   | 0             | 3                | Satisfied          |
| 13{4}      | 357.45           | 1.02   | 0             | 5                | Satisfied          |
| 13{5}      | 370.49           | 1.08   | 0             | 5                | Satisfied          |
| 13{6}      | 378.46           | 3.14   | 0             | 3                | Satisfied          |
| 14{1}      | 350.45           | 2.26   | 2             | 3                | Satisfied          |
| 14{2}      | 380.48           | 3.07   | 2             | 5                | Satisfied          |
| 14{3}      | 368.45           | 3.16   | 2             | 4                | Satisfied          |

|          |        |      |   |   |               |
|----------|--------|------|---|---|---------------|
| 14{4}    | 359.47 | 1.17 | 2 | 6 | Satisfied     |
| 14{5}    | 372.5  | 0.57 | 2 | 5 | Satisfied     |
| 14{6}    | 380.49 | 3.37 | 2 | 5 | Satisfied     |
| 16{2,1}  | 464.6  | 3.51 | 1 | 4 | Satisfied     |
| 16{3,1}  | 452.56 | 3.81 | 1 | 3 | Satisfied     |
| 16{4,1}  | 443.58 | 1.91 | 1 | 5 | Satisfied     |
| 16{1,2}  | 422.52 | 1.7  | 1 | 4 | Satisfied     |
| 16{5,2}  | 444.57 | 0.6  | 1 | 6 | Satisfied     |
| 16{6,2}  | 452.54 | 2.06 | 1 | 4 | Satisfied     |
| 16{1,3}  | 444.52 | 2.79 | 1 | 3 | Satisfied     |
| 16{5,3}  | 466.57 | 1.09 | 1 | 5 | Satisfied     |
| 16{6,3}  | 474.55 | 3.15 | 1 | 3 | Satisfied     |
| 16{1,4}  | 455.55 | 2.51 | 1 | 4 | Satisfied     |
| 16{5,4}  | 477.6  | 0.82 | 1 | 6 | Satisfied     |
| 16{6,4}  | 485.57 | 2.87 | 1 | 4 | Satisfied     |
| 16{1,5}  | 479.57 | 3.58 | 1 | 4 | Satisfied     |
| 16{5,5}  | 501.62 | 1.89 | 1 | 6 | One Violation |
| 16{6,5}  | 509.6  | 3.95 | 1 | 4 | One Violation |
| 16{2,6}  | 520.64 | 3.32 | 1 | 5 | One Violation |
| 16{3,6}  | 508.6  | 3.62 | 1 | 4 | One Violation |
| 16{4,6}  | 499.62 | 1.72 | 1 | 6 | Satisfied     |
| 16{1,7}  | 520.64 | 3.32 | 1 | 5 | One Violation |
| 16{5,7}  | 542.69 | 1.63 | 1 | 7 | One Violation |
| 16{6,7}  | 550.67 | 3.69 | 1 | 5 | One Violation |
| 16{1,8}  | 475.62 | 3.56 | 2 | 3 | Satisfied     |
| 16{5,8}  | 497.67 | 1.87 | 2 | 5 | Satisfied     |
| 16{6,8}  | 505.65 | 3.93 | 2 | 3 | One Violation |
| 16{2,9}  | 499.6  | 3.62 | 2 | 4 | Satisfied     |
| 16{3,9}  | 487.57 | 3.92 | 2 | 3 | Satisfied     |
| 16{4,9}  | 478.58 | 2.02 | 2 | 5 | Satisfied     |
| 16{1,10} | 538.47 | 4.99 | 2 | 3 | One Violation |
| 16{5,10} | 560.52 | 3.29 | 2 | 5 | One Violation |
| 16{6,10} | 568.49 | 5.35 | 2 | 3 | Violated      |
| 16{1,11} | 467.62 | 2.6  | 2 | 3 | Satisfied     |
| 16{5,11} | 489.67 | 0.91 | 2 | 5 | Satisfied     |
| 16{6,11} | 497.65 | 2.97 | 2 | 3 | Satisfied     |
| 16{1,12} | 503.63 | 4.81 | 2 | 2 | One Violation |
| 16{5,12} | 525.68 | 2.93 | 2 | 4 | One Violation |
| 16{6,12} | 533.66 | 5.18 | 2 | 2 | Violated      |
| 17{7}    | 348.48 | 4.05 | 0 | 3 | Satisfied     |
| 17{8}    | 378.46 | 3.16 | 0 | 5 | Satisfied     |
| 17{4}    | 343.46 | 1.78 | 0 | 5 | Satisfied     |
| 18{7}    | 350.5  | 3.54 | 2 | 3 | Satisfied     |
| 18{8}    | 380.48 | 2.65 | 2 | 5 | Satisfied     |
| 18{4}    | 345.48 | 1.27 | 2 | 5 | Satisfied     |
| 19{7,3}  | 444.57 | 4.06 | 1 | 3 | Satisfied     |

|          |        |      |   |   |               |
|----------|--------|------|---|---|---------------|
| 19{8,3}  | 474.55 | 3.17 | 1 | 5 | Satisfied     |
| 19{4,3}  | 439.55 | 1.79 | 1 | 5 | Satisfied     |
| 19{7,13} | 504.68 | 5.27 | 1 | 4 | Violated      |
| 19{8,13} | 534.67 | 4.38 | 1 | 6 | One Violation |
| 19{4,13} | 499.67 | 3    | 1 | 6 | Satisfied     |
| 19{7,5}  | 469.62 | 5.06 | 2 | 3 | One Violation |
| 19{8,5}  | 499.6  | 4.17 | 2 | 5 | Satisfied     |
| 19{4,5}  | 464.61 | 3.44 | 2 | 7 | Satisfied     |
| 20{7,14} | 444.65 | 6.72 | 0 | 3 | One Violation |
| 20{8,14} | 474.63 | 5.83 | 0 | 5 | One Violation |
| 20{4,14} | 439.63 | 4.45 | 0 | 5 | Satisfied     |
| 21{7,14} | 446.67 | 6.04 | 1 | 3 | One Violation |
| 21{8,14} | 476.65 | 5.15 | 1 | 5 | One Violation |
| 21{4,14} | 441.65 | 3.77 | 1 | 5 | Satisfied     |

600 MHz NMR OX

BAQ-01-136

expt Proton

| SAMPLE      |            | SPECIAL |        |
|-------------|------------|---------|--------|
| date        | Jun 4 2009 | temp    | 27.0   |
| time        | 12:00      | spin    | 20     |
| file        | exp        | hst     | 0.008  |
| ACQUISITION |            | pw90    | 11.600 |
| sw          | 9615.4     | attd    | 10.000 |
| nl          | 76824      | flgs    | n      |
| fb          | 4000       | 11      | n      |
| bs          | 32         | 1n      | n      |
| ss          | 2.00       | ds      | Y      |
| nt          | 64         | hs      | nm     |
| ct          | 64         | 1b      | 0.10   |
| TRANSMITTER |            | fn      | 262144 |
| sfreq       | 599.753    | sp      | -239.9 |
| lof         | 539.7      | wp      | 6297.3 |
| tpwr        | 61         | ftf1    | 1199.9 |
| pw          | 1.938      | ftf2    | 140.0  |
| DECOUPLER   |            | tp      | 9.6    |
| dn          | C13        | PL0T    | 250    |
| dof         | 0          | dm      | 17.0   |
| dm          | mm         | sc      | 12     |
| dms         | c          | th      | 35088  |
| dms2        | c          | at      | cdcc   |
| dms3        | c          | ph      |        |

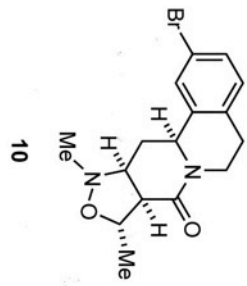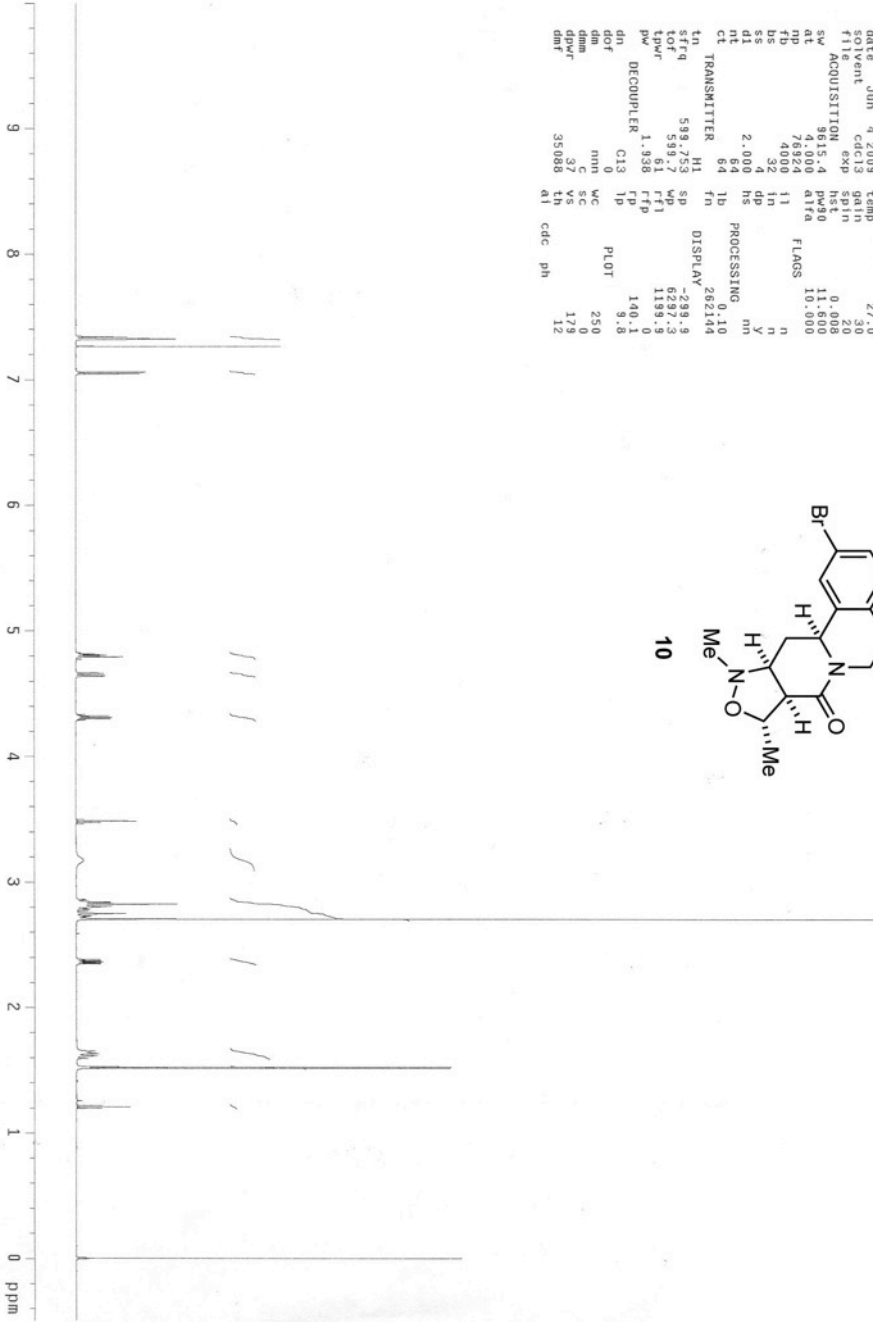



600 MHz NMR/COX

BAG-01-136

exp1 Carbon

| PARAMETER   | VALUE    | UNIT | DESCRIPTION |
|-------------|----------|------|-------------|
| SAMPLE      | 4        |      | 2008        |
| date        | Jun      |      | 2008        |
| solvent     | cdcl3    |      |             |
| file        | exp      |      |             |
| ACQUISITION | exp      | bst  |             |
| sw          | 38764.7  | Hz   | pw90        |
| nu1         | 147058   | Hz   | at174       |
| nu2         | 17000    | Hz   | l1          |
| bs          | 64       | Hz   | lp          |
| ns          | 2        |      | lp          |
| nl          | 2        |      | lp          |
| nl          | 2000     | Hz   | lp          |
| ct          | 2000     |      |             |
| TRANSMITTER | C13      |      |             |
| fn          | 150.423  | MHz  |             |
| lof         | 1542.3   | Hz   |             |
| lpwr        | 58       | W    |             |
| pw          | 2.600    | μs   |             |
| DECOUPLER   | H1       |      |             |
| dn          | 0        |      |             |
| dof         | 0        |      |             |
| dm          | yyy      |      |             |
| dmm         | w        |      |             |
| dpr         | 48       |      |             |
| dmf         | 15337    | Hz   |             |
| at          | cdcl3    |      |             |
| th          |          |      |             |
| PROCESSING  | nm       |      |             |
| 0.50        |          |      |             |
| DISP        | not used |      |             |
| SP          | -754.2   | Hz   |             |
| MP          | 30915.3  | Hz   |             |
| FF1         | 2541.8   | Hz   |             |
| FF2         | 133.0    | Hz   |             |
| FF3         | 14.3     | Hz   |             |
| PL0T        |          |      |             |
| WC          | 250      | Hz   |             |
| SC          | 69144    | Hz   |             |
| TH          | 68       |      |             |

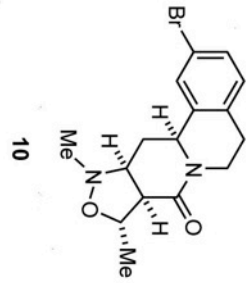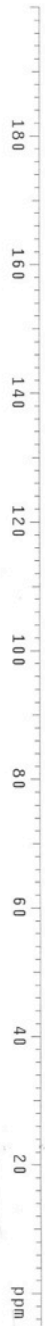

Data File L:\09-11\GRANGER\160911-SFM00381-13356.D  
Sample Name: SFM0038

=====  
Acq. Operator : bretttag35@mail.utexas.edu  
Acq. Instrument : LCMS Location : Vial 37  
Injection Date : 9/16/2011 10:17:10 PM Inj Volume : 1.0 µl  
Acq. Method : C:\CHEM32\1\METHODS\SP\_NIH.M  
Last changed : 9/16/2011 10:16:49 PM by bretttag35@mail.utexas.edu  
(modified after loading)  
Analysis Method : C:\CHEM32\1\METHODS\DEF\_LC.M  
Last changed : 11/20/2006 4:14:44 AM  
Sample Info : Easy-Access Method: 'SP\_NIH'

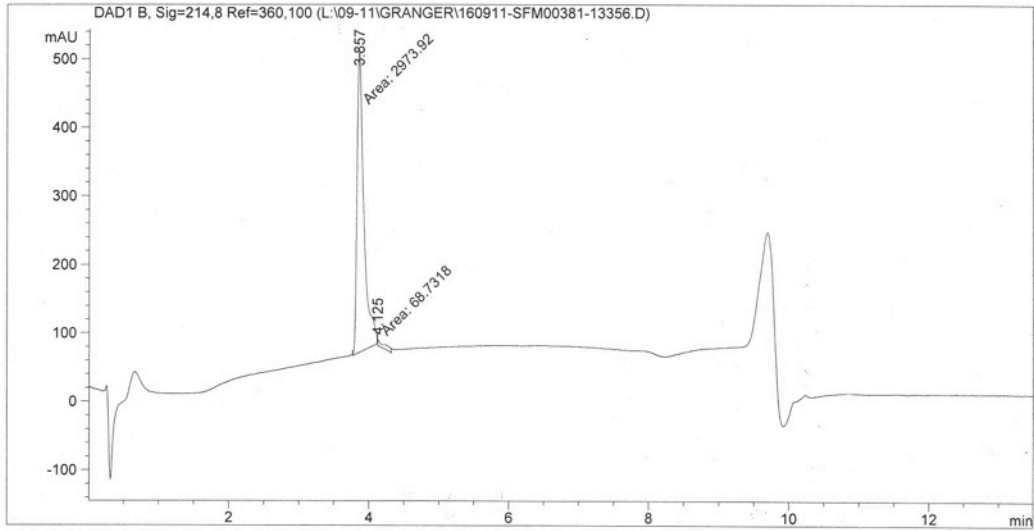

=====  
Area Percent Report  
=====

Sorted By : Signal  
Multiplier: : 1.0000  
Dilution: : 1.0000  
Use Multiplier & Dilution Factor with ISTDs

Signal 1: DAD1 B, Sig=214,8 Ref=360,100

| Peak # | RetTime [min] | Type | Width [min] | Area [mAU*s] | Height [mAU] | Area %  |
|--------|---------------|------|-------------|--------------|--------------|---------|
| 1      | 3.857         | MM   | 0.1121      | 2973.91821   | 442.11911    | 97.7411 |
| 2      | 4.125         | MM   | 0.1001      | 68.73178     | 10.16864     | 2.2589  |

Totals : 3042.64999 452.28775

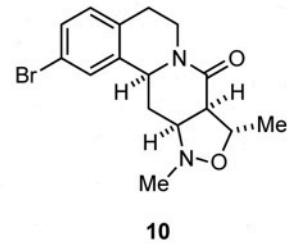

Print of window 79: MS Spectrum  
Data File : L:\09-11\GRANGER\160911-SFM00381-13356.D  
Sample Name : SFM0038

=====  
Acq. Operator : bretttag35@mail.utexas.edu  
Acq. Instrument : LCMS Location : Vial 37  
Injection Date : 9/16/2011 10:17:10 PM Inj : 1  
Inj Volume : 1.0 µl  
Acq. Method : C:\CHEM32\1\METHODS\SP\_NIH.M  
Last changed : 9/16/2011 10:16:49 PM by bretttag35@mail.utexas.edu  
(modified after loading)  
Analysis Method : C:\CHEM32\1\METHODS\DEF\_LC.M  
Last changed : 11/20/2006 4:14:44 AM  
Sample Info : Easy-Access Method: 'SP\_NIH'

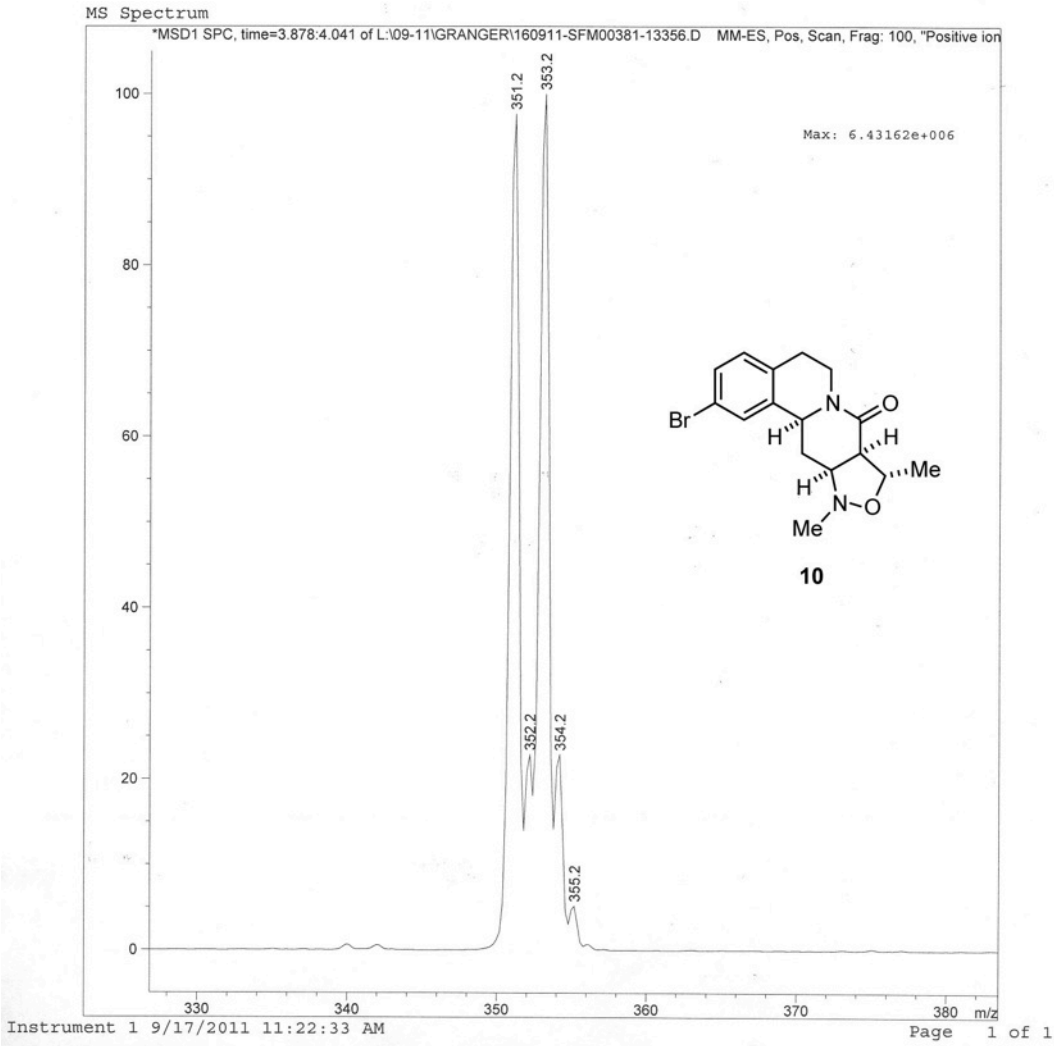

600 MHz: mrocx  
K167

expt1 Proton

| date        | time    | temp   | SPECIAL    |
|-------------|---------|--------|------------|
| Nov 1 2010  | 12:10   | 25.0   |            |
| file        | cd13    | gain   | 30         |
| solvent     |         | spin   | 20         |
| exp         | hse     | 0.008  |            |
| sw          | 15.4    | 11.890 |            |
| ACQUISITION |         |        |            |
| at          | 4.000   | atfa   | 10.000     |
| np          | 76924   |        |            |
| fb          | 4000    | 11     | n          |
| bs          |         | 2.002  | dh         |
| nt          | 64      | hs     | nm         |
| ct          | 64      | ib     | PROCESSING |
| td          | H1      | fn     | 0.10       |
| stfg        | 599.753 | sp     | 262104     |
| tof         | 599.7   | sp     | -299.9     |
| tpwr        | 61      | mp     | 6297.3     |
| pw          | 1.938   | ftf    | 1200.4     |
| DECOUPLER   | C13     | fdp    | 46.9       |
| dm          | 0       | lp     | 12.6       |
| dof         | 0       | PLDT   |            |
| dm          | 3       | MC     | 250        |
| dmr         | 3       | VS     | 701        |
| dmf         | 35088   | th     | 12         |
|             |         | at     | cdc ph     |

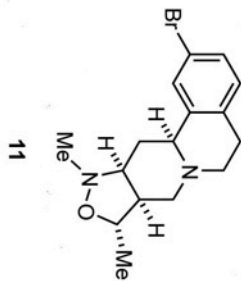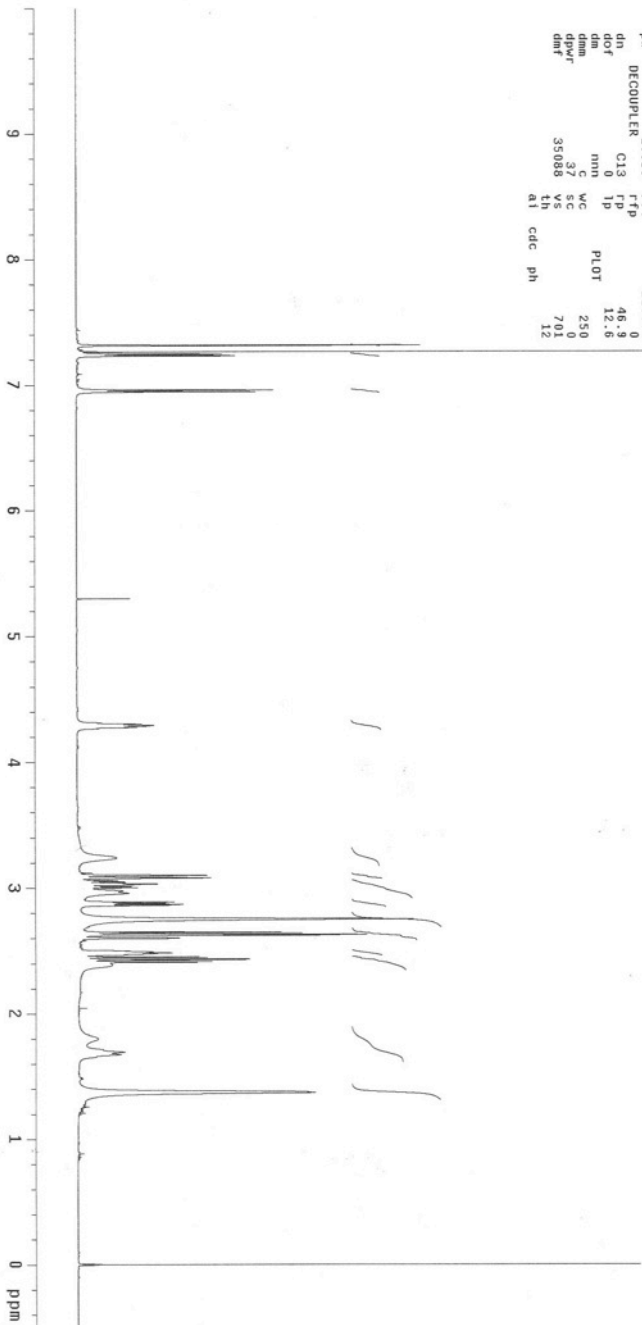

600 MHz nmrOx

KK167

exp4 cartoon

```
SAMPLE 1 2010 temp 25.0
date Nov cdc13 gain 40
solvent cdc13 exp hsc10 20
file ACQUISITION exp hsc10 0.000
SU 4833.4833 7.400
at 2.000 151290 atfa 10.000
np 151290 17000 11
fb 17000 11
ds 2.000 dn
nt 6000 hs
ct 6000 6000 hs
PROCESSING 0.50
t1 c13 tn 1b
sfreq 150.824 fn 1b not used
tof 2295.3 sp -754.3
tpwr 58 mp 30915.4
pw 2.600 f1 133.8
DECOUPLER H1 f2 133.8
dn 0 f3 133.8
dof 0 f4 133.8
dm yyy mc -0.0
dim w
sdim 48
dref 15337 vs 26735
at cdc bh 6
```

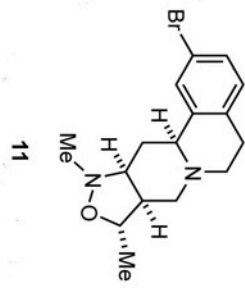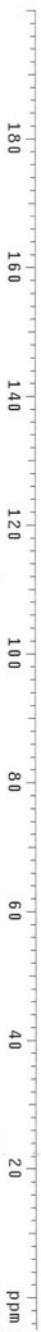

Data File L:\09-11\GRANGER\160911-SFM07721-13357.D  
Sample Name: SFM0772

=====  
Acq. Operator : bretttag35@mail.utexas.edu  
Acq. Instrument : LCMS Location : Vial 38  
Injection Date : 9/16/2011 10:32:35 PM Inj Volume : 1.0 µl  
Acq. Method : C:\CHEM32\1\METHODS\SP\_NIH.M  
Last changed : 9/16/2011 10:32:14 PM by bretttag35@mail.utexas.edu  
(modified after loading)  
Analysis Method : C:\CHEM32\1\METHODS\DEF\_LC.M  
Last changed : 11/20/2006 4:14:44 AM  
Sample Info : Easy-Access Method: 'SP\_NIH'

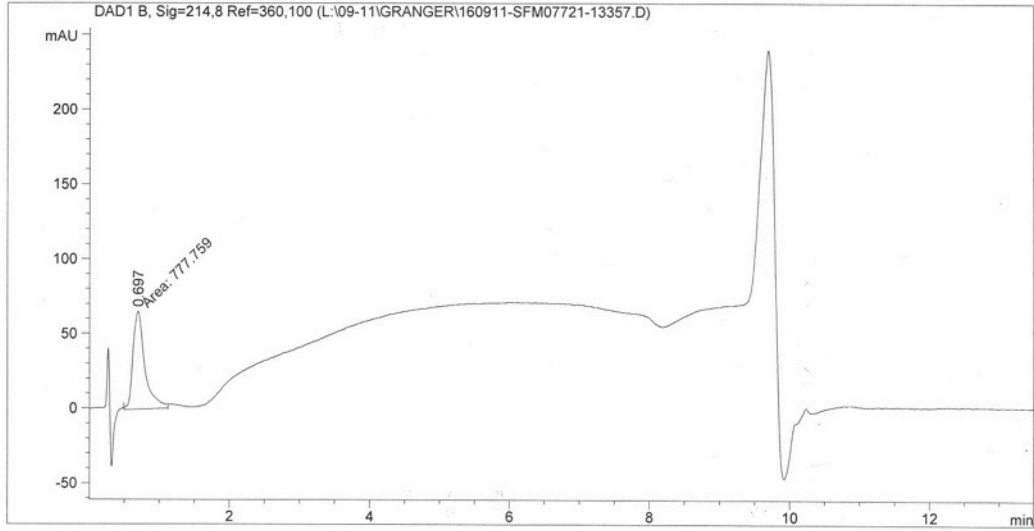

=====  
Area Percent Report  
=====

Sorted By : Signal  
Multiplier: : 1.0000  
Dilution: : 1.0000  
Use Multiplier & Dilution Factor with ISTDs

Signal 1: DAD1 B, Sig=214,8 Ref=360,100

| Peak # | RetTime [min] | Type | Width [min] | Area [mAU*s] | Height [mAU] | Area %   |
|--------|---------------|------|-------------|--------------|--------------|----------|
| 1      | 0.697         | MM   | 0.1970      | 777.75891    | 65.79211     | 100.0000 |

Totals : 777.75891 65.79211

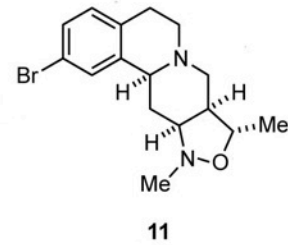

Print of window 79: MS Spectrum  
Data File : L:\09-11\GRANGER\160911-SFM07721-13357.D  
Sample Name : SFM0772

=====  
Acq. Operator : bretttag35@mail.utexas.edu  
Acq. Instrument : LCMS Location : Vial 38  
Injection Date : 9/16/2011 10:32:35 PM Inj : 1  
Inj Volume : 1.0 µl  
Acq. Method : C:\CHEM32\1\METHODS\SP\_NIH.M  
Last changed : 9/16/2011 10:32:14 PM by bretttag35@mail.utexas.edu  
(modified after loading)  
Analysis Method : C:\CHEM32\1\METHODS\DEF\_LC.M  
Last changed : 11/20/2006 4:14:44 AM  
Sample Info : Easy-Access Method: 'SP\_NIH'

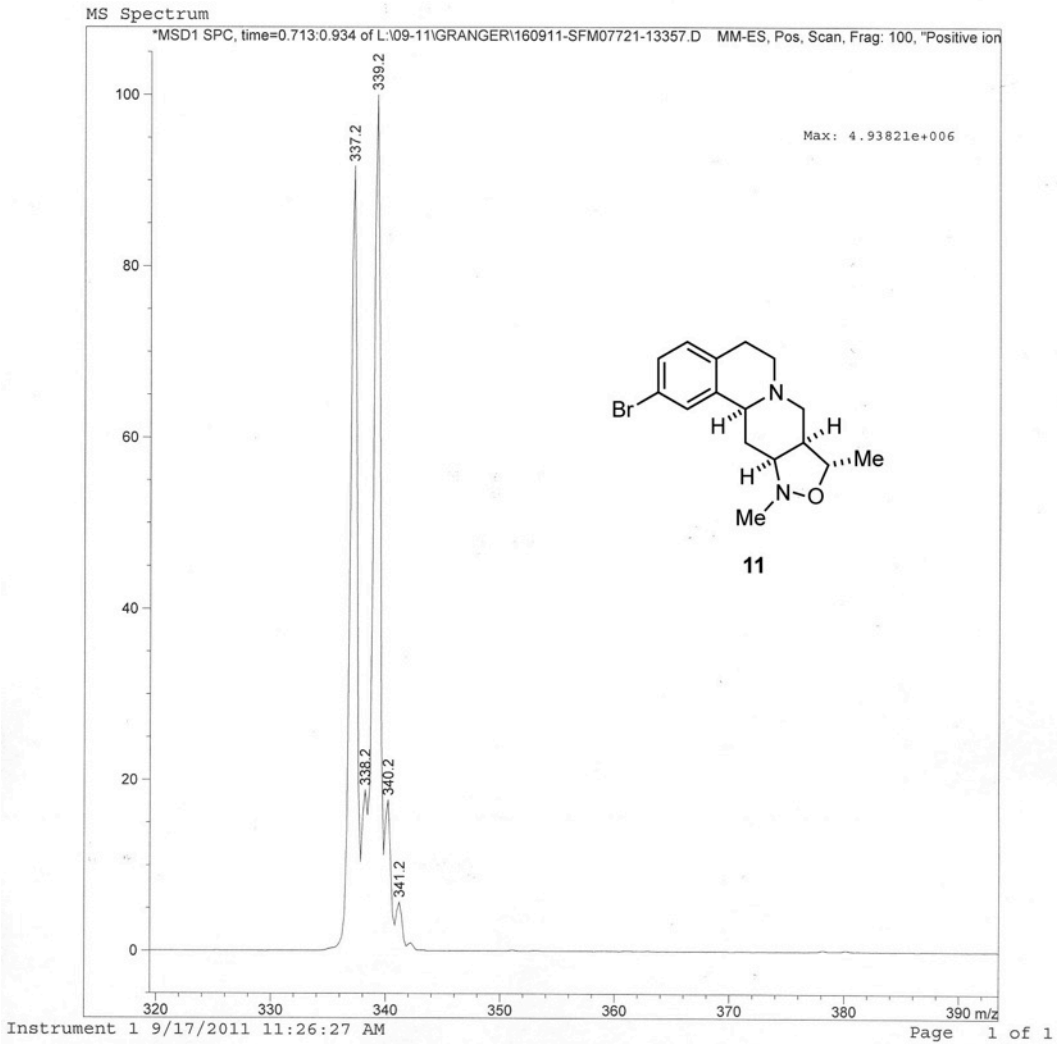

600 MHz nmrOx

BA0-01-148

exp1 Proton

| PARAMETER   | VALUE       | SPECIAL     |
|-------------|-------------|-------------|
| date        | Jul 20 2009 | 27.10       |
| solvent     | cdcl3       | gain 20     |
| PROBHD      | 5mm         | h1 20       |
| ACQUISITION | exp hst     | 0.008       |
| sw          | 9615.4      | pw90 11.600 |
| at          | 4.000       | atfa 10.000 |
| fb          | 4.000       | 11          |
| bs          | 32          | in          |
| d1          | 2.000       | dp          |
| CL          | 64          | hs          |
| CT          | 64          | hs          |
| TRANSMITTER | H1          | 1b          |
| tn          | 599.753     | fn          |
| stfq        | 59.5        | sp          |
| lpar        | 61          | wp          |
| pw          | 1.938       | rf1         |
| DECOUPLER   | C13         | rfp         |
| dn          | mm          | tp          |
| dm          | mm          | tp          |
| dman        | C           | wc          |
| dpvr        | 37          | sc          |
| dnt         | 35008       | ts          |
| ai          | 15          | 73          |
| ai          | cdcl3       | ph          |

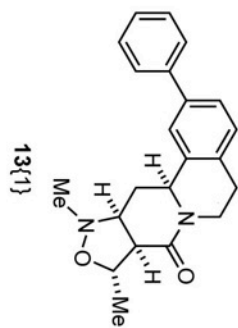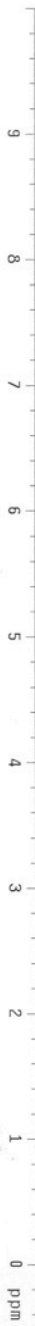



600 MHz nmrox  
 BAQ-01-148  
 exp4 Carbon

| PARAMETER   | VALUE       | SPECIAL      |
|-------------|-------------|--------------|
| date        | Jul 20 2009 | temp 27.0    |
| solvent     | cdcl3       | gain 20      |
| f1          | exp         | hst 0.008    |
| ACQUISITION | exp         | pw90 7.800   |
| sw          | 38784.7     | qlfda 10.000 |
| at          | 2.000       | flags        |
| fb          | 17000       | 11           |
| bs          | 64          | in           |
| ds          | 2.000       | dp           |
| dl          | 2.000       | hs           |
| cl          | 2368        | PROCESSING   |
| TRANSMITTER | 2368        | nm           |
| tn          | C13         | 1b           |
| sf          | 150.823     | fn           |
| sp          | 150.823     | rot used     |
| mp          | 58          | DISPLAY      |
| ff1         | 2542.7      | 754.2        |
| ff2         | 2542.7      | 33931.5      |
| pw          | 2.600       | FF1          |
| FF2         | 2542.7      | FF2          |
| FF3         | 117.4       | FF3          |
| FF4         | 5.48        | FF4          |
| FF5         | 250         | FF5          |
| FF6         | 35683       | FF6          |
| FF7         | 0           | FF7          |
| FF8         | 0           | FF8          |
| FF9         | 0           | FF9          |
| FF10        | 0           | FF10         |
| FF11        | 0           | FF11         |
| FF12        | 0           | FF12         |
| FF13        | 0           | FF13         |
| FF14        | 0           | FF14         |
| FF15        | 0           | FF15         |
| FF16        | 0           | FF16         |
| FF17        | 0           | FF17         |
| FF18        | 0           | FF18         |
| FF19        | 0           | FF19         |
| FF20        | 0           | FF20         |
| FF21        | 0           | FF21         |
| FF22        | 0           | FF22         |
| FF23        | 0           | FF23         |
| FF24        | 0           | FF24         |
| FF25        | 0           | FF25         |
| FF26        | 0           | FF26         |
| FF27        | 0           | FF27         |
| FF28        | 0           | FF28         |
| FF29        | 0           | FF29         |
| FF30        | 0           | FF30         |
| FF31        | 0           | FF31         |
| FF32        | 0           | FF32         |
| FF33        | 0           | FF33         |
| FF34        | 0           | FF34         |
| FF35        | 0           | FF35         |
| FF36        | 0           | FF36         |
| FF37        | 0           | FF37         |
| FF38        | 0           | FF38         |
| FF39        | 0           | FF39         |
| FF40        | 0           | FF40         |
| FF41        | 0           | FF41         |
| FF42        | 0           | FF42         |
| FF43        | 0           | FF43         |
| FF44        | 0           | FF44         |
| FF45        | 0           | FF45         |
| FF46        | 0           | FF46         |
| FF47        | 0           | FF47         |
| FF48        | 0           | FF48         |
| FF49        | 0           | FF49         |
| FF50        | 0           | FF50         |
| FF51        | 0           | FF51         |
| FF52        | 0           | FF52         |
| FF53        | 0           | FF53         |
| FF54        | 0           | FF54         |
| FF55        | 0           | FF55         |
| FF56        | 0           | FF56         |
| FF57        | 0           | FF57         |
| FF58        | 0           | FF58         |
| FF59        | 0           | FF59         |
| FF60        | 0           | FF60         |
| FF61        | 0           | FF61         |
| FF62        | 0           | FF62         |
| FF63        | 0           | FF63         |
| FF64        | 0           | FF64         |
| FF65        | 0           | FF65         |
| FF66        | 0           | FF66         |
| FF67        | 0           | FF67         |
| FF68        | 0           | FF68         |
| FF69        | 0           | FF69         |
| FF70        | 0           | FF70         |
| FF71        | 0           | FF71         |
| FF72        | 0           | FF72         |
| FF73        | 0           | FF73         |
| FF74        | 0           | FF74         |
| FF75        | 0           | FF75         |
| FF76        | 0           | FF76         |
| FF77        | 0           | FF77         |
| FF78        | 0           | FF78         |
| FF79        | 0           | FF79         |
| FF80        | 0           | FF80         |
| FF81        | 0           | FF81         |
| FF82        | 0           | FF82         |
| FF83        | 0           | FF83         |
| FF84        | 0           | FF84         |
| FF85        | 0           | FF85         |
| FF86        | 0           | FF86         |
| FF87        | 0           | FF87         |
| FF88        | 0           | FF88         |
| FF89        | 0           | FF89         |
| FF90        | 0           | FF90         |
| FF91        | 0           | FF91         |
| FF92        | 0           | FF92         |
| FF93        | 0           | FF93         |
| FF94        | 0           | FF94         |
| FF95        | 0           | FF95         |
| FF96        | 0           | FF96         |
| FF97        | 0           | FF97         |
| FF98        | 0           | FF98         |
| FF99        | 0           | FF99         |
| FF100       | 0           | FF100        |

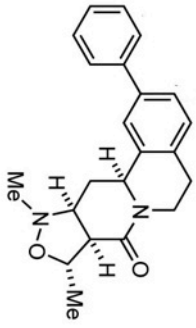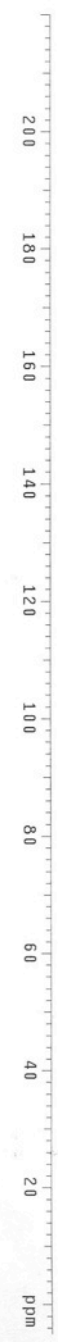

Data File L:\09-11\GRANGER\160911-SFM00391-13358.D  
 Sample Name: SFM0039

```

=====
Acq. Operator   : brettag35@mail.utexas.edu
Acq. Instrument : LCMS                               Location : Vial 39
Injection Date  : 9/16/2011 10:47:42 PM
                                                    Inj Volume : 1.0 µl

Acq. Method     : C:\CHEM32\1\METHODS\SP_NIH.M
Last changed    : 9/16/2011 10:47:26 PM by brettag35@mail.utexas.edu
                  (modified after loading)
Analysis Method : C:\CHEM32\1\METHODS\DEF_LC.M
Last changed    : 11/20/2006 4:14:44 AM
Sample Info     : Easy-Access Method: 'SP_NIH'
  
```

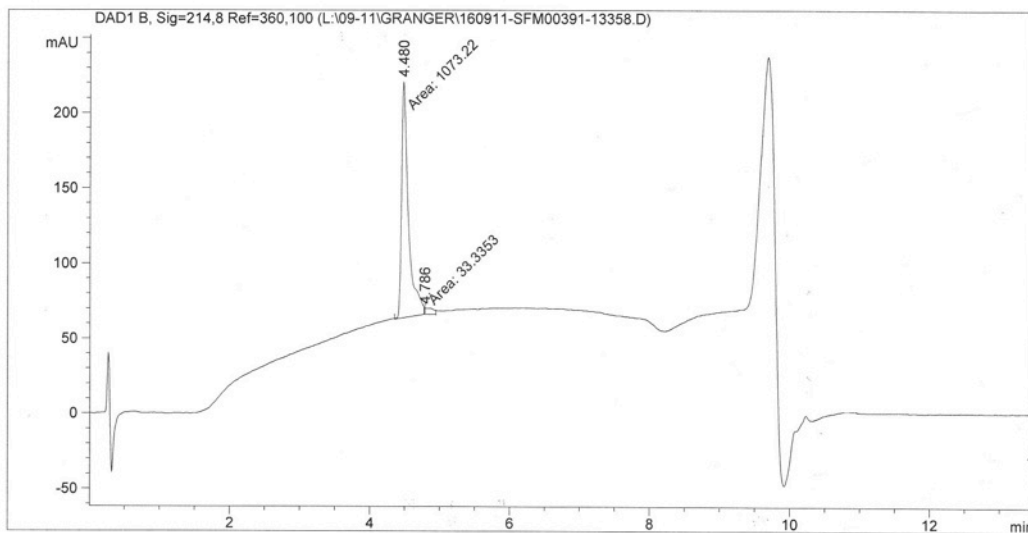

=====  
 Area Percent Report  
 =====

```

Sorted By      :      Signal
Multiplier:    :      1.0000
Dilution:      :      1.0000
Use Multiplier & Dilution Factor with ISTDs
  
```

Signal 1: DAD1 B, Sig=214,8 Ref=360,100

| Peak # | RetTime [min] | Type | Width [min] | Area [mAU*s] | Height [mAU] | Area %  |
|--------|---------------|------|-------------|--------------|--------------|---------|
| 1      | 4.480         | MM   | 0.1135      | 1073.22461   | 157.65465    | 96.9875 |
| 2      | 4.786         | MM   | 0.1069      | 33.33529     | 4.29844      | 3.0125  |

Totals :                                    1106.55990   161.95308

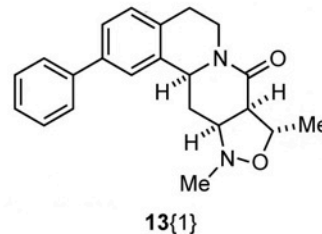

Print of window 79: MS Spectrum  
Data File : L:\09-11\GRANGER\160911-SFM00391-13358.D  
Sample Name : SFM0039

=====  
Acq. Operator : bretttag35@mail.utexas.edu Location : Vial 39  
Acq. Instrument : LCMS Inj : 1  
Injection Date : 9/16/2011 10:47:42 PM Inj Volume : 1.0 µl  
  
Acq. Method : C:\CHEM32\1\METHODS\SP\_NIH.M  
Last changed : 9/16/2011 10:47:26 PM by bretttag35@mail.utexas.edu  
(modified after loading)  
Analysis Method : C:\CHEM32\1\METHODS\DEF\_LC.M  
Last changed : 11/20/2006 4:14:44 AM  
Sample Info : Easy-Access Method: 'SP\_NIH'

MS Spectrum

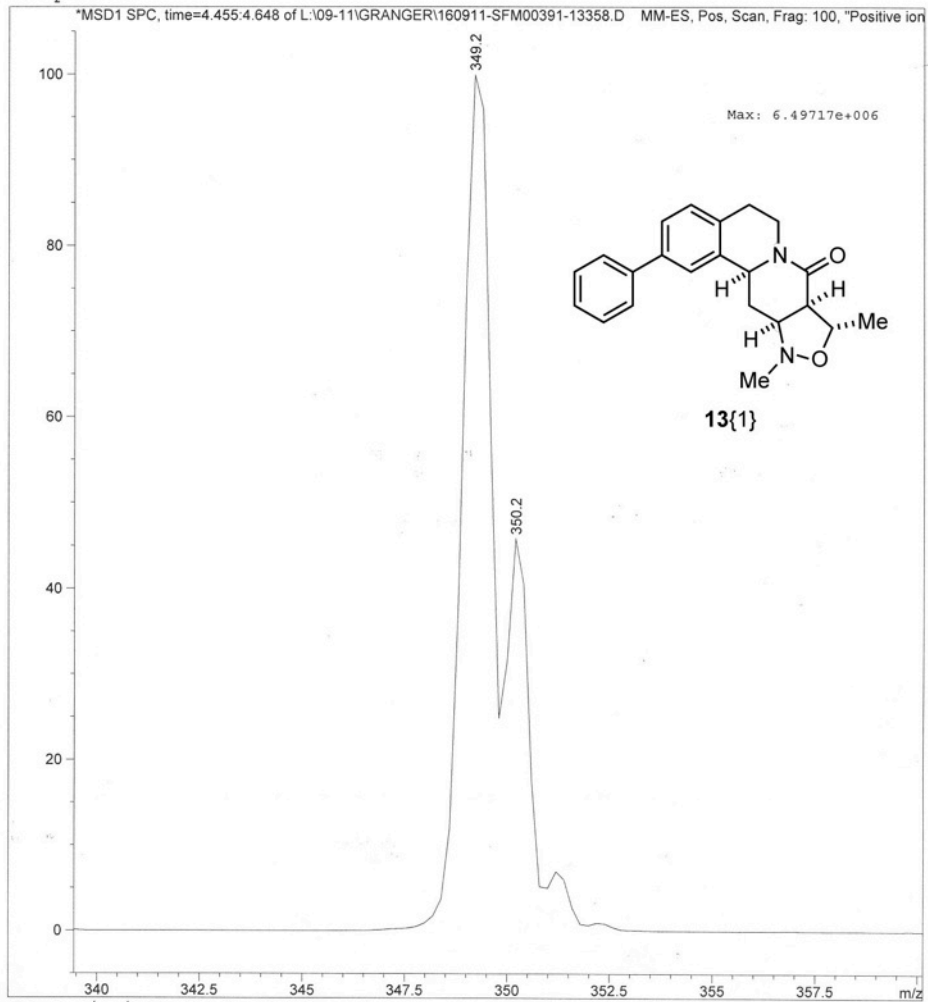

600 MHz nmrox

BA0-01-149

exp1 Proton

|         |             |      |        |            |        |
|---------|-------------|------|--------|------------|--------|
| date    | JUL 17 2009 | temp | 27.0   | SPECIAL    |        |
| solvent | cdcl3       | gain | 20     |            |        |
| f1      | 600.135     | h1   | 100    |            |        |
| f2      | 600.135     | h2   | 20     |            |        |
| sw      | 9615.4      | pw90 | 11.600 |            |        |
| at      | 4.000       | d1fa | 10.000 |            |        |
| fb      | 4000        | l1   | n      |            |        |
| bs      | 32          | in   | n      |            |        |
| d1      | 2.000       | dp   | y      |            |        |
| ct      | 64          | hs   | m      |            |        |
| ct      | 64          | hs   | m      |            |        |
| tn      | 599.753     | h1   | 1b     | PROCESSING | 0.10   |
| sfreq   | 599.753     | sp   |        | DISPLAY    | 262144 |
| tpwr    | 51          | mp   |        |            | -236.8 |
| pw      | 1.938       | rf1  |        |            | 6237.3 |
|         |             | rfp  |        |            | 1201.3 |
| dn      | DECOUPLER   | C13  | tp     |            | 138.1  |
| dm      | nmn         | tp   |        | PL01       | 9.0    |
| dmdm    | c           | wc   |        |            | 25.0   |
| dpvr    | 37          | sc   |        |            | 0      |
| dmt     | 35008       | ts   |        |            | 42     |
|         |             | ti   |        |            | 22     |
|         |             | at   | cdc    | ph         |        |

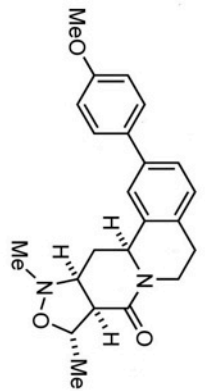

13{2}

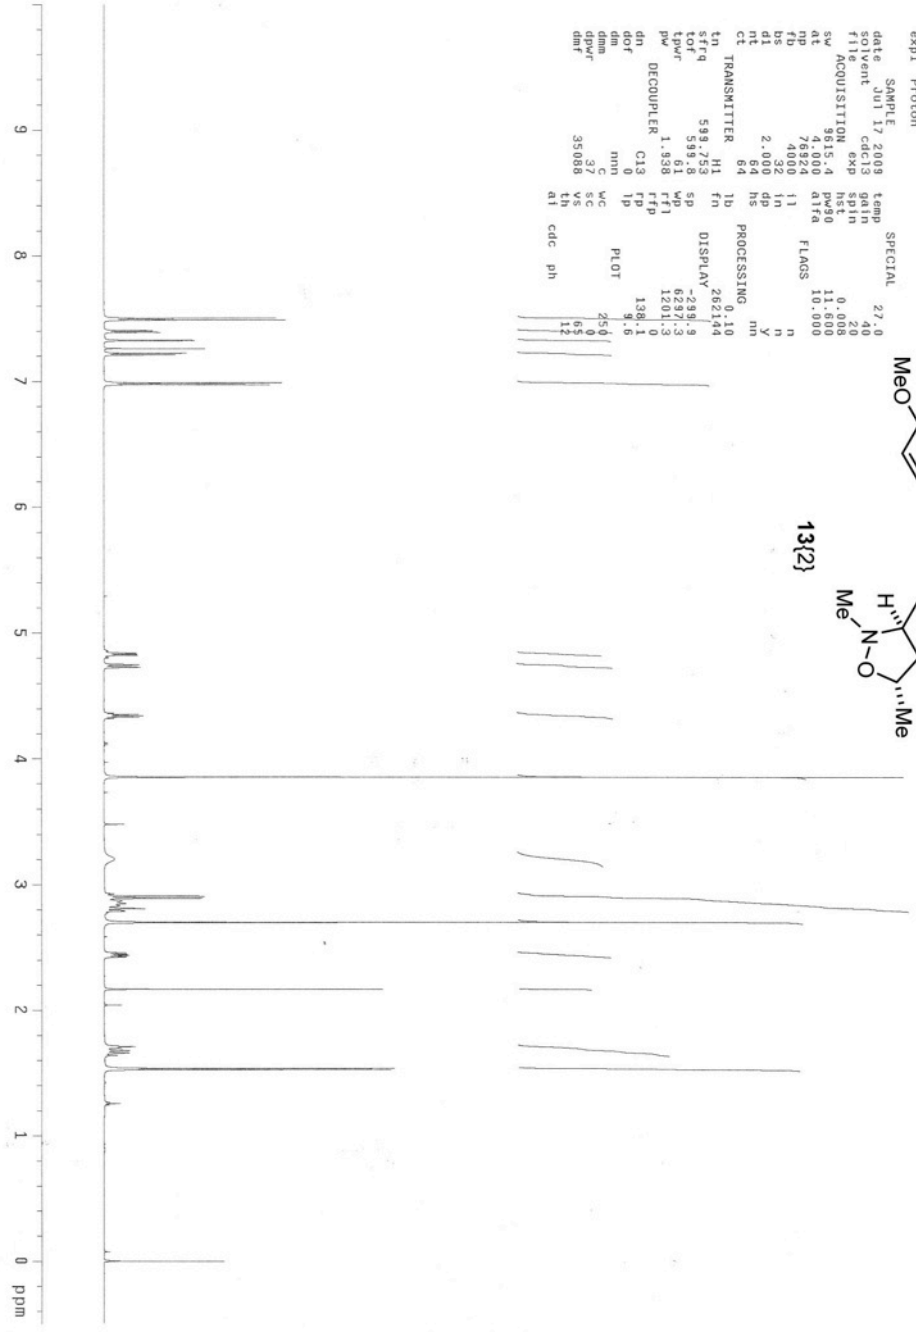

600 MHz nmrox

BA0-01-149

exp4 Carbon

|             |             |            |          |
|-------------|-------------|------------|----------|
| date        | SAMPLE      | temp       | SPECIAL  |
| Jul 17 2009 | Jul 17 2009 | 27.0       |          |
| solvent     | cdcl3       | gain       |          |
| Acquisition | exp         | 0.008      |          |
| 38784.7     | pw90        | 7.800      |          |
| 2.000       | atfa        | 10.000     |          |
| 17000       | 11          |            |          |
| 64          | in          | n          |          |
| 2.000       | dp          | hs         |          |
| 6000        | hs          | PROCESSING | nm       |
| 6000        | 1b          | 0.50       |          |
| tn          | C13         | fn         | not used |
| 150.823     | sp          | DISPLAY    | 754.2    |
| 150428      | wp          |            | 30915.3  |
| 2.600       | fft1        |            | 2542.7   |
|             | ffp         |            | 122.0    |
|             | TP          |            | 20.0     |
|             | WC          |            | 250      |
|             | SC          |            | 42946    |
|             | TI          |            |          |
|             | ai          | cdc        | ph       |

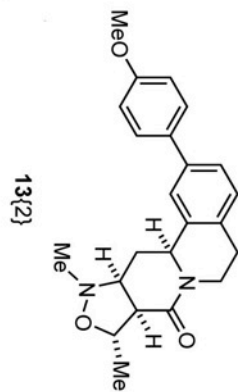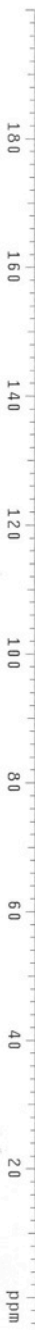

Data File L:\09-11\GRANGER\160911-SFM00401-13359.D  
Sample Name: SFM0040

=====  
Acq. Operator : bretttag35@mail.utexas.edu  
Acq. Instrument : LCMS Location : Vial 40  
Injection Date : 9/16/2011 11:02:41 PM Inj Volume : 1.0 µl  
Acq. Method : C:\CHEM32\1\METHODS\SP\_NIH.M  
Last changed : 9/16/2011 11:02:26 PM by bretttag35@mail.utexas.edu  
(modified after loading)  
Analysis Method : C:\CHEM32\1\METHODS\DEF\_LC.M  
Last changed : 11/20/2006 4:14:44 AM  
Sample Info : Easy-Access Method: 'SP\_NIH'

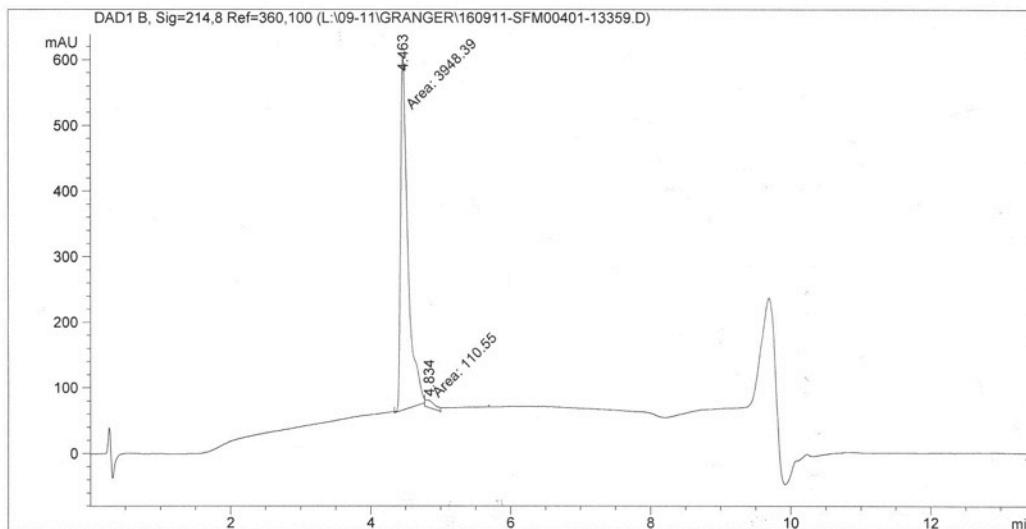

=====  
Area Percent Report  
=====

Sorted By : Signal  
Multiplier: : 1.0000  
Dilution: : 1.0000  
Use Multiplier & Dilution Factor with ISTDs

Signal 1: DAD1 B, Sig=214,8 Ref=360,100

| Peak # | RetTime [min] | Type | Width [min] | Area [mAU*s] | Height [mAU] | Area %  |
|--------|---------------|------|-------------|--------------|--------------|---------|
| 1      | 4.463         | MM   | 0.1212      | 3948.38672   | 542.93597    | 97.2764 |
| 2      | 4.834         | MM   | 0.1661      | 110.54974    | 11.09314     | 2.7236  |

Totals : 4058.93646 554.02912

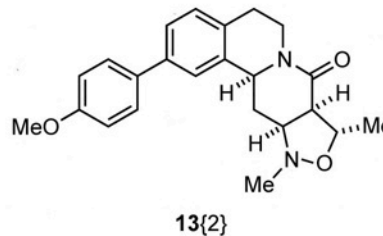

Print of window 79: MS Spectrum  
Data File : L:\09-11\GRANGER\160911-SFM00401-13359.D  
Sample Name : SFM0040

=====  
Acq. Operator : bretttag35@mail.utexas.edu  
Acq. Instrument : LCMS Location : Vial 40  
Injection Date : 9/16/2011 11:02:41 PM Inj : 1  
Inj Volume : 1.0 µl  
Acq. Method : C:\CHEM32\1\METHODS\SP\_NIH.M  
Last changed : 9/16/2011 11:02:26 PM by bretttag35@mail.utexas.edu  
(modified after loading)  
Analysis Method : C:\CHEM32\1\METHODS\DEF\_LC.M  
Last changed : 11/20/2006 4:14:44 AM  
Sample Info : Easy-Access Method: 'SP\_NIH'

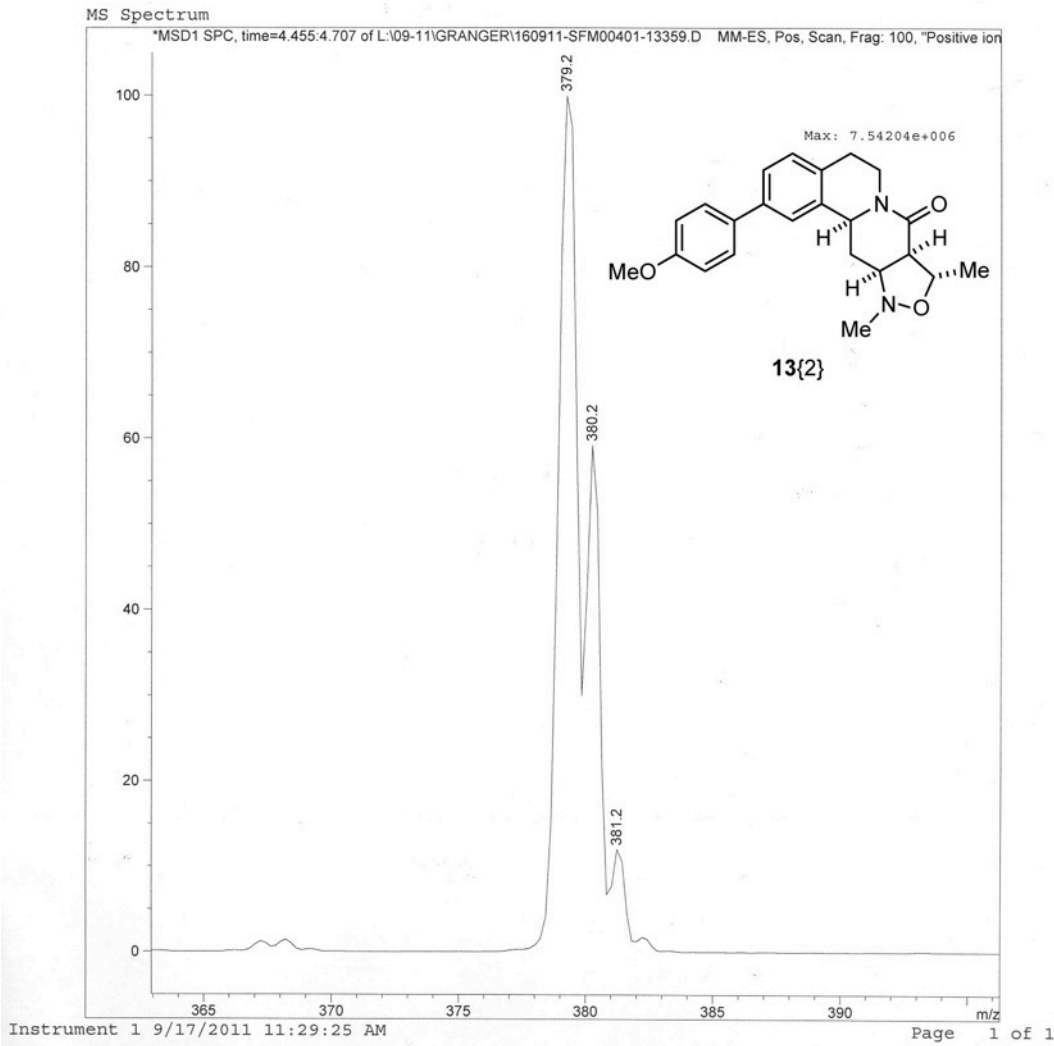

600 MHz nmrOx  
 BAG-01-150  
 exp1 Proton  
 SAMPLE Jun 21 2009 temp 27.0  
 solvent cdc13 gain 20  
 F1 ACQUISITION exp hse 0.008  
 sw 9615.4 pw90 11.600  
 at 4.000 d1fa 10.000  
 fd 4000 i1 n  
 bs 32 in n  
 d1 2.000 dp hs y  
 ct TRANSMITTER 64  
 tn H1 fb 1b PROCESSING 0.10  
 stfq 599.753 sp DISPLAY 262144  
 colr 39.51 mp 6237.3  
 pw 1.938 rff1 1199.9  
 DECOUPLER C13 rfp 131.6  
 dn dnf tp 10.4  
 dima mmn wc 250  
 dpvr c 37 sc  
 dmf 35098 vs 75  
 ai cdc ph 4

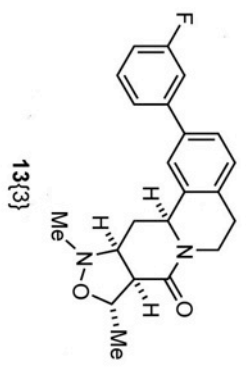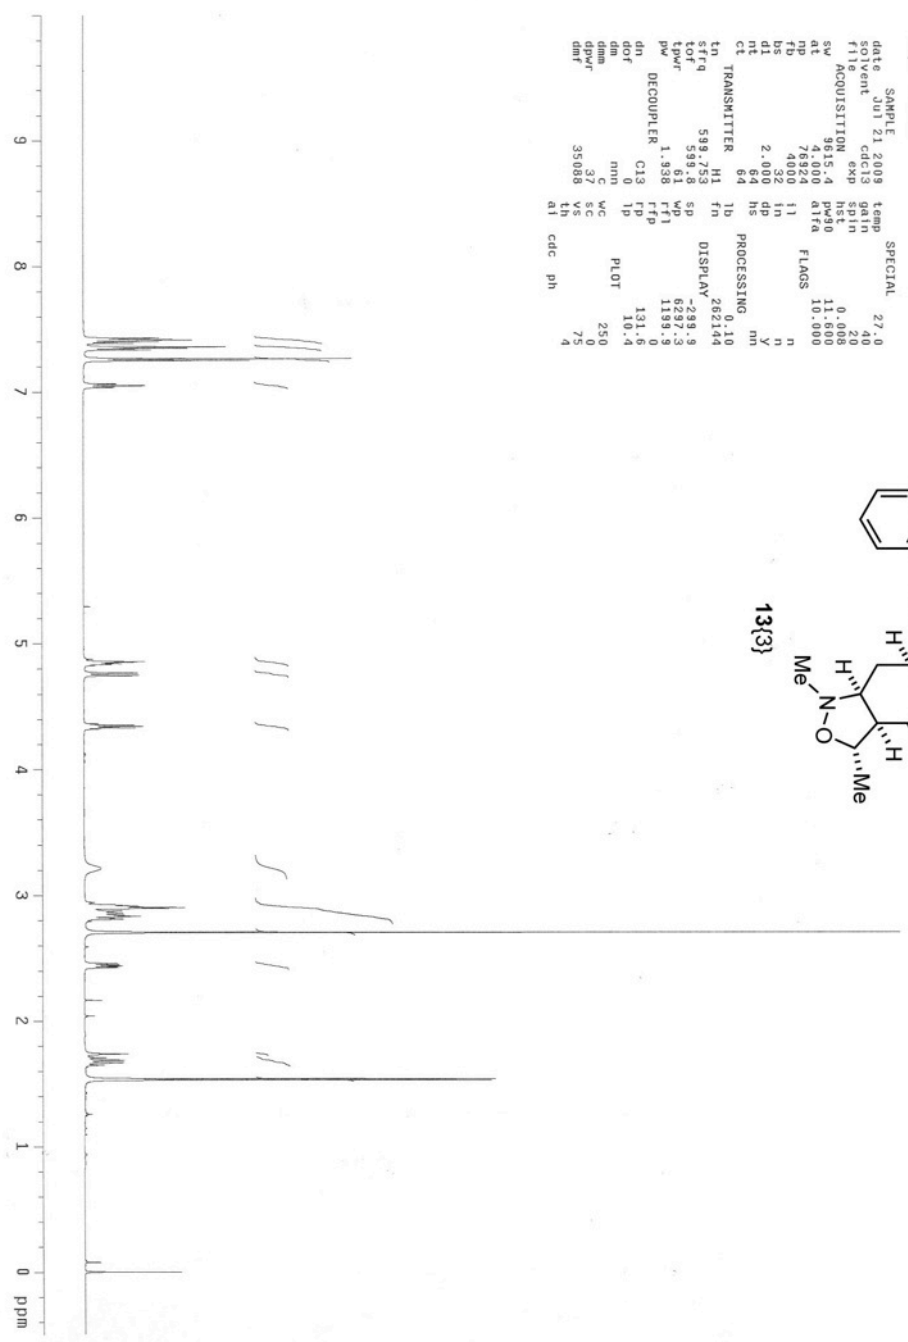



600 MHz nmrox  
 BAG-01-150  
 expd Carbon  
 SAMPLE Jul 21 2009 temp 27.0  
 date Jul 21 2009 gain 1.20  
 solvent cdc13 gain 2.0  
 F1 ACQUISITION exp hst1 0.008  
 SW 38784.7 pw90 7.800  
 at 2.000 a1fa 10.000  
 fp 17000 i1  
 bs 64 in n  
 d1 2.000 dp n  
 nt 8000 hs  
 ct 3394  
 TRANSMITTER C13 1b fn not used  
 stfq 150.823 sp DISPLAY 754.2  
 tnr 150.25 wfp 30915.3  
 pw 2.600 FFI 2542.7  
 DECOUPLER H1 FFP 113.7  
 dn H1 TP 12.1  
 dot YYV W SC PLOT 250  
 dnm 46 SC 0  
 dpvr 15337 VS 48298  
 dmf ai cdc ph

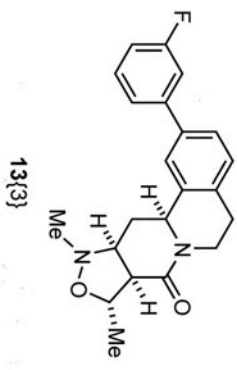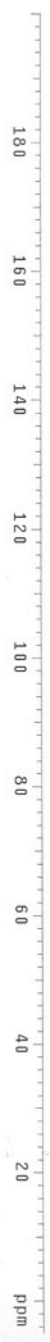

Data File L:\09-11\GRANGER\160911-SFM01451-13360.D  
Sample Name: SFM0145

=====  
Acq. Operator : bretttag35@mail.utexas.edu  
Acq. Instrument : LCMS Location : Vial 41  
Injection Date : 9/16/2011 11:17:44 PM Inj Volume : 1.0 µl  
Acq. Method : C:\CHEM32\1\METHODS\SP\_NIH.M  
Last changed : 9/16/2011 11:17:29 PM by bretttag35@mail.utexas.edu  
(modified after loading)  
Analysis Method : C:\CHEM32\1\METHODS\DEF\_LC.M  
Last changed : 11/20/2006 4:14:44 AM  
Sample Info : Easy-Access Method: 'SP\_NIH'

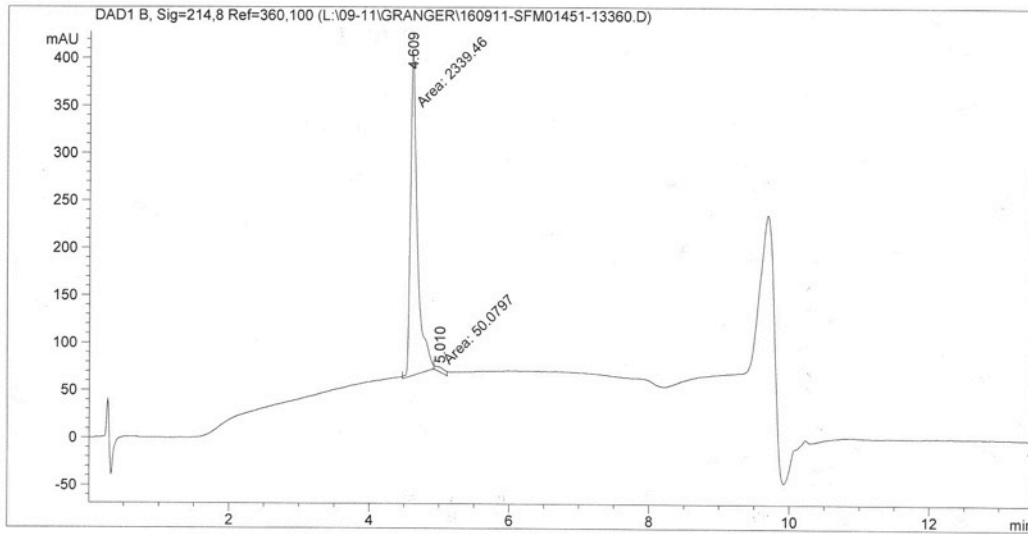

=====  
Area Percent Report  
=====

Sorted By : Signal  
Multiplier: : 1.0000  
Dilution: : 1.0000  
Use Multiplier & Dilution Factor with ISTDs

Signal 1: DAD1 B, Sig=214,8 Ref=360,100

| Peak # | RetTime [min] | Type | Width [min] | Area [mAU*s] | Height [mAU] | Area %  |
|--------|---------------|------|-------------|--------------|--------------|---------|
| 1      | 4.609         | MM   | 0.1145      | 2339.45825   | 340.49762    | 97.9042 |
| 2      | 5.010         | MM   | 0.1514      | 50.07967     | 4.97597      | 2.0958  |

Totals : 2389.53792 345.47359

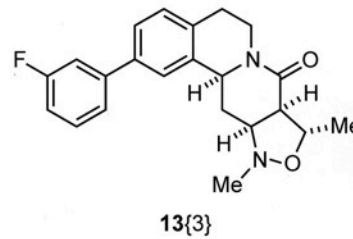

Print of window 79: MS Spectrum  
Data File : L:\09-11\GRANGER\160911-SFM01451-13360.D  
Sample Name : SFM0145

=====  
Acq. Operator : bretttag35@mail.utexas.edu  
Acq. Instrument : LCMS Location : Vial 41  
Injection Date : 9/16/2011 11:17:44 PM Inj : 1  
Inj Volume : 1.0 µl  
Acq. Method : C:\CHEM32\1\METHODS\SP\_NIH.M  
Last changed : 9/16/2011 11:17:29 PM by bretttag35@mail.utexas.edu  
(modified after loading)  
Analysis Method : C:\CHEM32\1\METHODS\DEF\_LC.M  
Last changed : 11/20/2006 4:14:44 AM  
Sample Info : Easy-Access Method: 'SP\_NIH'

MS Spectrum

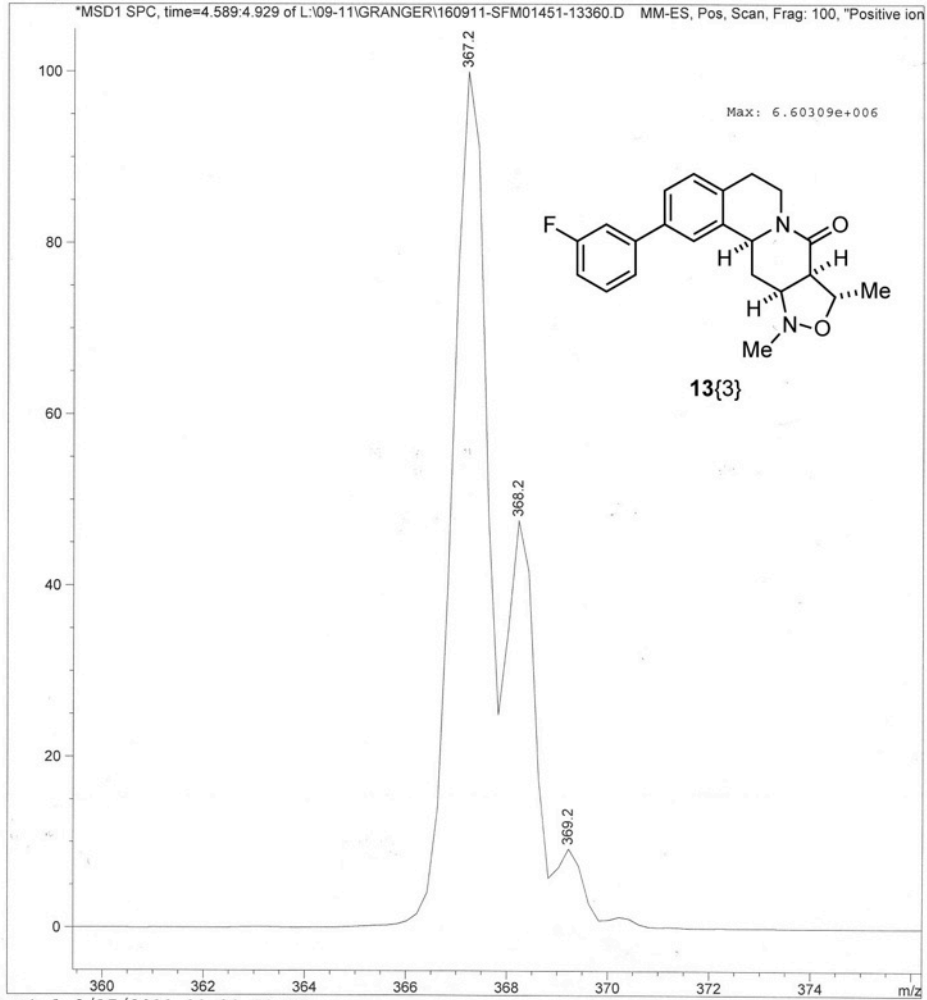

500 MHz, nm<sup>2</sup>0

BAG-01-153

expt1 Proton

```
SAMPLE          SPECIAL
date Jul 16 2009 temp 27.0
solvent cdcl3 gain 30
file /home/servic/~spin
/vnmr/sy/data/bag_~ hst 0.008
AQUS173.DM .fid p490 1.1800
ACQUS173.DM 0178 0.1800
sw 7397.6
at 4.001 11
np 6400 1n
f2 400 1p
b2 32 hp
d1 2.000
nt 64 1b
CE TRANSMITTER H1 SP PROCESSING 0.10
tn 64 1b DISPLAY 262144
sfreq 499.868 mp -250.0
lof 499.7 rftl 5248.5
cpwr 1.833 rfp 992.7
pw 4 rfd -95.4
pc 1p -5.9
DECOUPLER C13 PLOT
dn 0 mc 250
dof 0 mmh
dmu 40 th 66
dpr 14285 at cdc ph 12
```

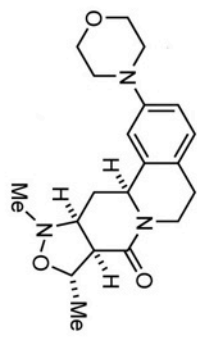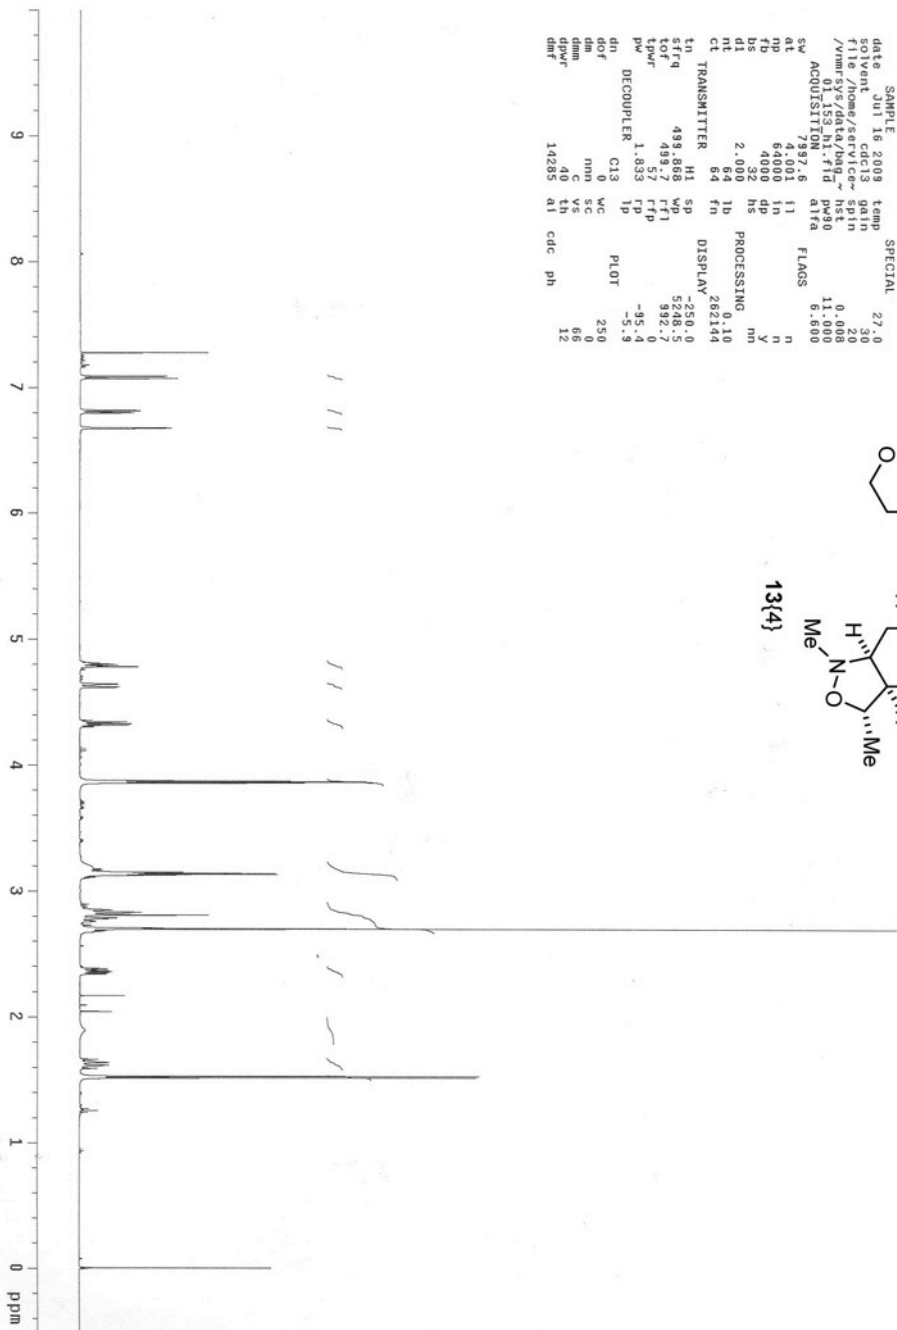

500 MHz nmr0

BAG-01-153

exp4 Carbon

```
SAMPLE          SPECIAL
date   011 16 2009   temp  27.6
solvent  DMSO-d6     gain   50
file   /home/service/~/hst
/vmr/sy5/date/bag/~hst  0.008
AQUSIS FID         P430  3.500
AQUSIS FID         Q174  10.000
sw      30165.9      11      FLAGS  10.000
at      1.958        11
np      18154        1n
b2      17016        1b
d1      2.000        1b
nt      4000         1b
ct      4000         1b
TRANSMITTER C13 SP      not used
tn          125.704 MP    -528.8
sfreq       125.704 MP    25766.4
lor         125.4      FT1  1913.4
cpwr        3.183      FT2  -24.2
pw          3.183      1p    -198.8
DECOUPLER  H1         PLOT
dn          0         WC     250
ddp        0         VC     2800
dmm        37        th
dpwr      10582      at    cdc ph
dfr
```

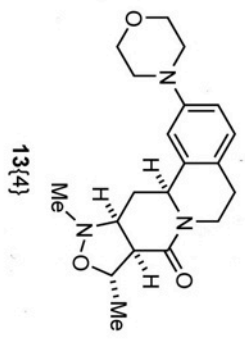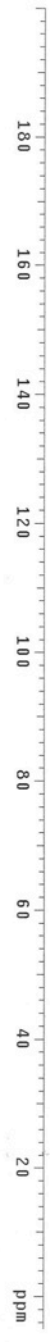

Data File L:\09-11\GRANGER\160911-SFM00411-13361.D  
Sample Name: SFM0041

=====  
Acq. Operator : bretttag35@mail.utexas.edu  
Acq. Instrument : LCMS Location : Vial 42  
Injection Date : 9/16/2011 11:32:45 PM Inj Volume : 1.0 µl  
Acq. Method : C:\CHEM32\1\METHODS\SP\_NIH.M  
Last changed : 9/16/2011 11:32:30 PM by bretttag35@mail.utexas.edu  
(modified after loading)  
Analysis Method : C:\CHEM32\1\METHODS\DEF\_LC.M  
Last changed : 11/20/2006 4:14:44 AM  
Sample Info : Easy-Access Method: 'SP\_NIH'

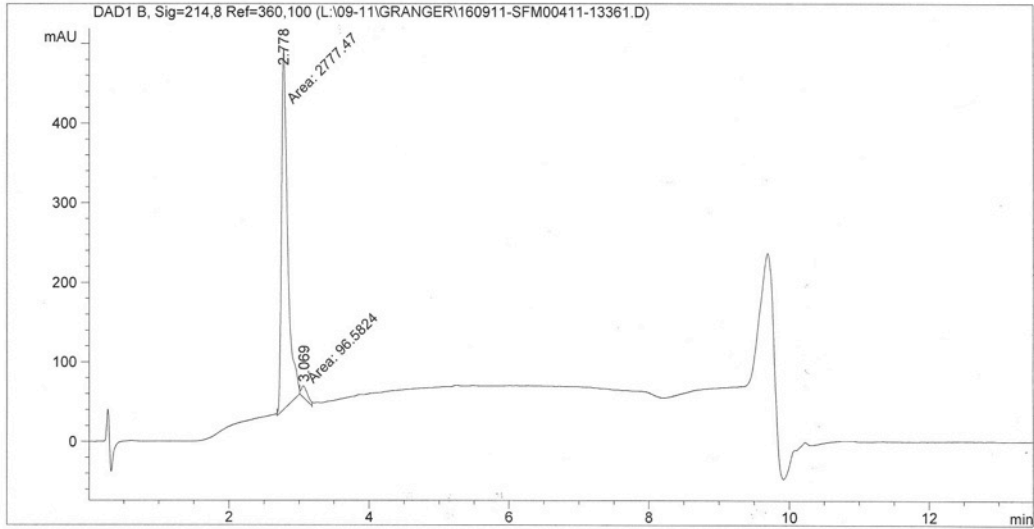

=====  
Area Percent Report  
=====

Sorted By : Signal  
Multiplier: : 1.0000  
Dilution: : 1.0000  
Use Multiplier & Dilution Factor with ISTDs

Signal 1: DAD1 B, Sig=214,8 Ref=360,100

| Peak # | RetTime [min] | Type | Width [min] | Area [mAU*s] | Height [mAU] | Area %  |
|--------|---------------|------|-------------|--------------|--------------|---------|
| 1      | 2.778         | MM   | 0.1017      | 2777.47241   | 455.14041    | 96.6395 |
| 2      | 3.069         | MM   | 0.1066      | 96.58239     | 15.10584     | 3.3605  |

Totals : 2874.05480 470.24625

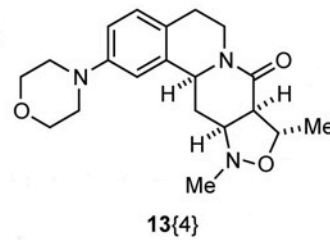

Print of window 79: MS Spectrum  
Data File : L:\09-11\GRANGER\160911-SFM00411-13361.D  
Sample Name : SFM0041

=====  
Acq. Operator : bretttag35@mail.utexas.edu  
Acq. Instrument : LCMS Location : Vial 42  
Injection Date : 9/16/2011 11:32:45 PM Inj : 1  
Inj Volume : 1.0 µl  
Acq. Method : C:\CHEM32\1\METHODS\SP\_NIH.M  
Last changed : 9/16/2011 11:32:30 PM by bretttag35@mail.utexas.edu  
(modified after loading)  
Analysis Method : C:\CHEM32\1\METHODS\DEF\_LC.M  
Last changed : 11/20/2006 4:14:44 AM  
Sample Info : Easy-Access Method: 'SP\_NIH'

MS Spectrum

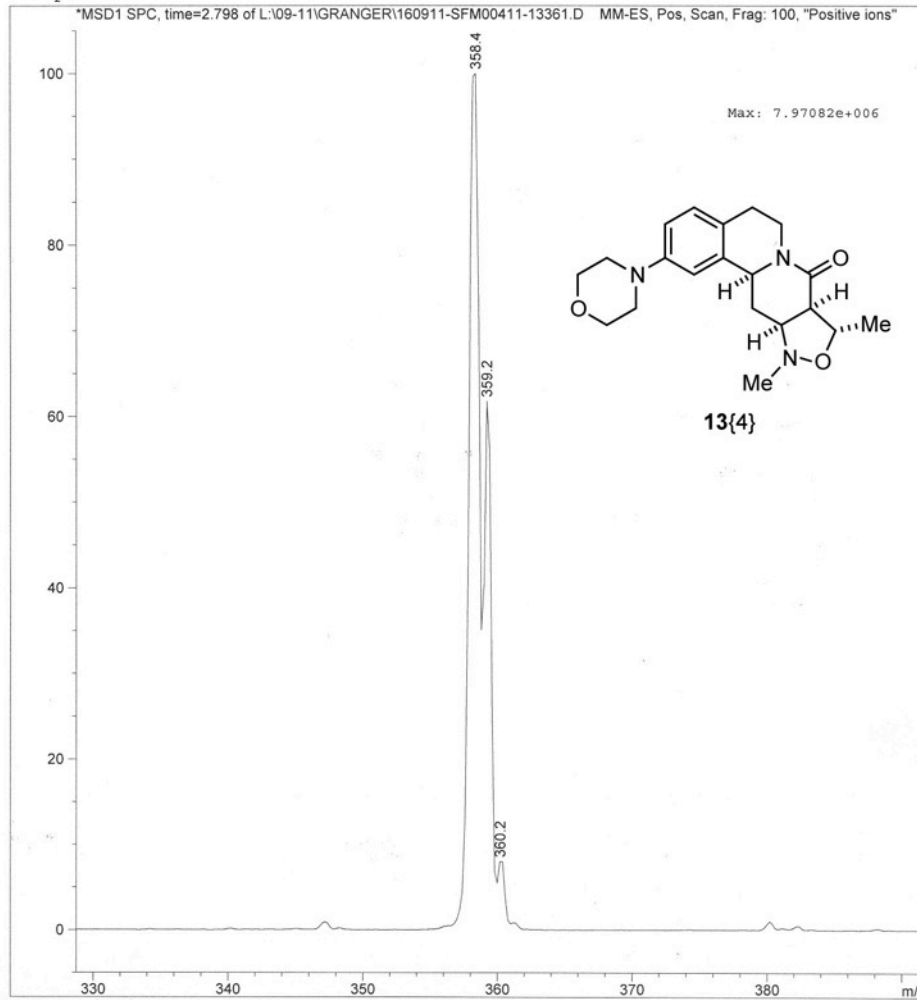

600 MHz nmrOx  
 BAQ-01-188  
 exp1 Proton  
 SAMPLE SPECIAL 27.0  
 date Jul 16 2009 temp 27.0  
 solvent cdcCl3 gain 20  
 /nmr/sv/date/baq ~ hst 0.008  
 01\_169\_n1.fid pw90 11.600  
 ACQUISITION 10.000  
 at 4.000 11 11  
 fb 78924 in n  
 fs 4090 dp n  
 ds 2.002 hs  
 nt 64 1b 0.10 PROCESSING 11  
 ct TRANSMITTER 64 fn 262144  
 tn TRANSMITTER H1 SP DISPLAY 299.9  
 sffq 539.753 MP 6237.3  
 tot 539.8 FT1 1194.4  
 tpr 61 FFP 134.6  
 pw 1.398 TP 11.1  
 dn DECOUPLER C13 PLOT 250  
 dot 0 WC 80  
 dm mn SC 12  
 dms 3 TS  
 dmfr 11  
 dmf 35088 at cdc ph

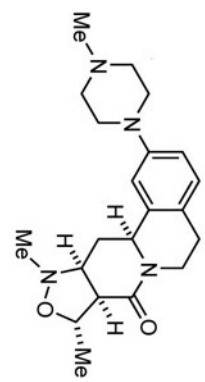

13{5}

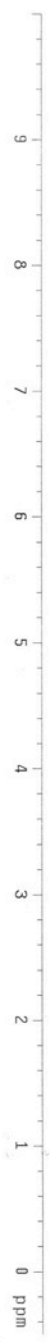



600 MHz nmrox  
 BAQ-01-188  
 exp4 Carbon

|             |             |      |            |
|-------------|-------------|------|------------|
| date        | JUL 16 2009 | temp | 27.0       |
| solvent     | cdcl3       | gain | 2.0        |
| f1          | 101.623     | hst  | 0.008      |
| ACQUISITION | exp         | pw90 | 7.800      |
| sw          | 38784.7     | qlfa | 10.000     |
| at          | 2.000       | l1   | n          |
| fb          | 17000       | in   | n          |
| bs          | 64          | dp   | y          |
| dl          | 2.000       | hs   | PROCESSING |
| cl          | 6000        | lb   | 0.50       |
| TRANSMITTER | 6000        | fn   | not used   |
| tn          | 150.823     | sp   | DISPLAY    |
| sfpq        | 150.823     | wp   | 754.2      |
| lpwr        | 150.823     | ff1  | 30915.3    |
| pw          | 2.600       | ffp  | 2541.8     |

DECOUPLER H1 TP 119.3  
 dncr . . . . .  
 dm . . . . .  
 dman . . . . .  
 dpwr . . . . .  
 dt 15537  
 ti 15  
 di cdc ph 36308

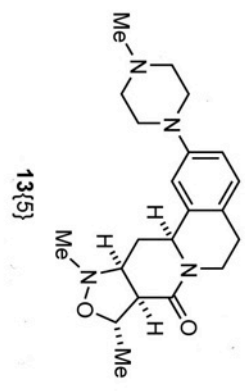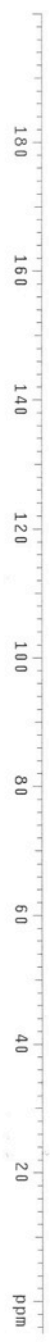

Data File Z:\01-10\GRANGER\120110-BAG-01-1681-00084.D  
Sample Name: BAG-01-168

=====  
Acq. Operator : bretttag35@gmail.com  
Acq. Instrument : LCMS Location : Vial 85  
Injection Date : 1/12/2010 9:06:27 PM Inj Volume : 1.0 µl  
Acq. Method : C:\CHEM32\1\METHODS\SP\_NIH.M  
Last changed : 1/12/2010 9:06:17 PM by bretttag35@gmail.com  
(modified after loading)  
Analysis Method : C:\CHEM32\1\METHODS\DEF\_LC.M  
Last changed : 11/20/2006 4:14:44 AM  
Sample Info : Easy-Access Method: 'SP\_NIH'

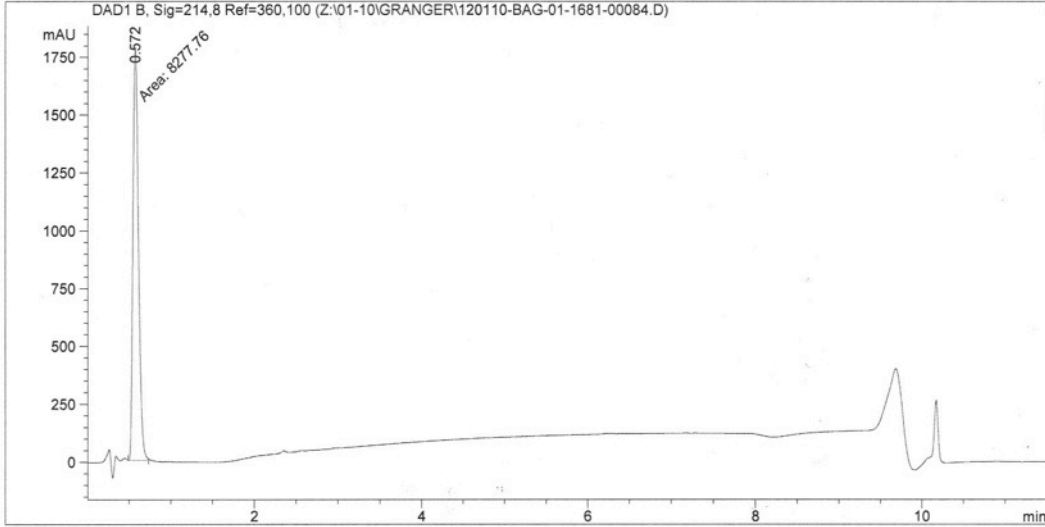

=====  
Area Percent Report  
=====

Sorted By : Signal  
Multiplier: : 1.0000  
Dilution: : 1.0000  
Use Multiplier & Dilution Factor with ISTDs

Signal 1: DAD1 B, Sig=214,8 Ref=360,100

| Peak # | RetTime [min] | Type | Width [min] | Area [mAU*s] | Height [mAU] | Area %   |
|--------|---------------|------|-------------|--------------|--------------|----------|
| 1      | 0.572         | MM   | 0.0769      | 8277.76172   | 1793.66711   | 100.0000 |

Totals : 8277.76172 1793.66711

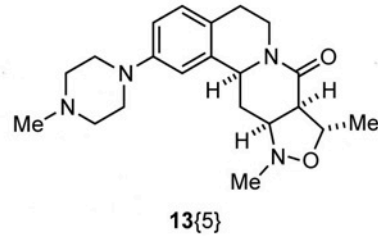

MS Spectrum

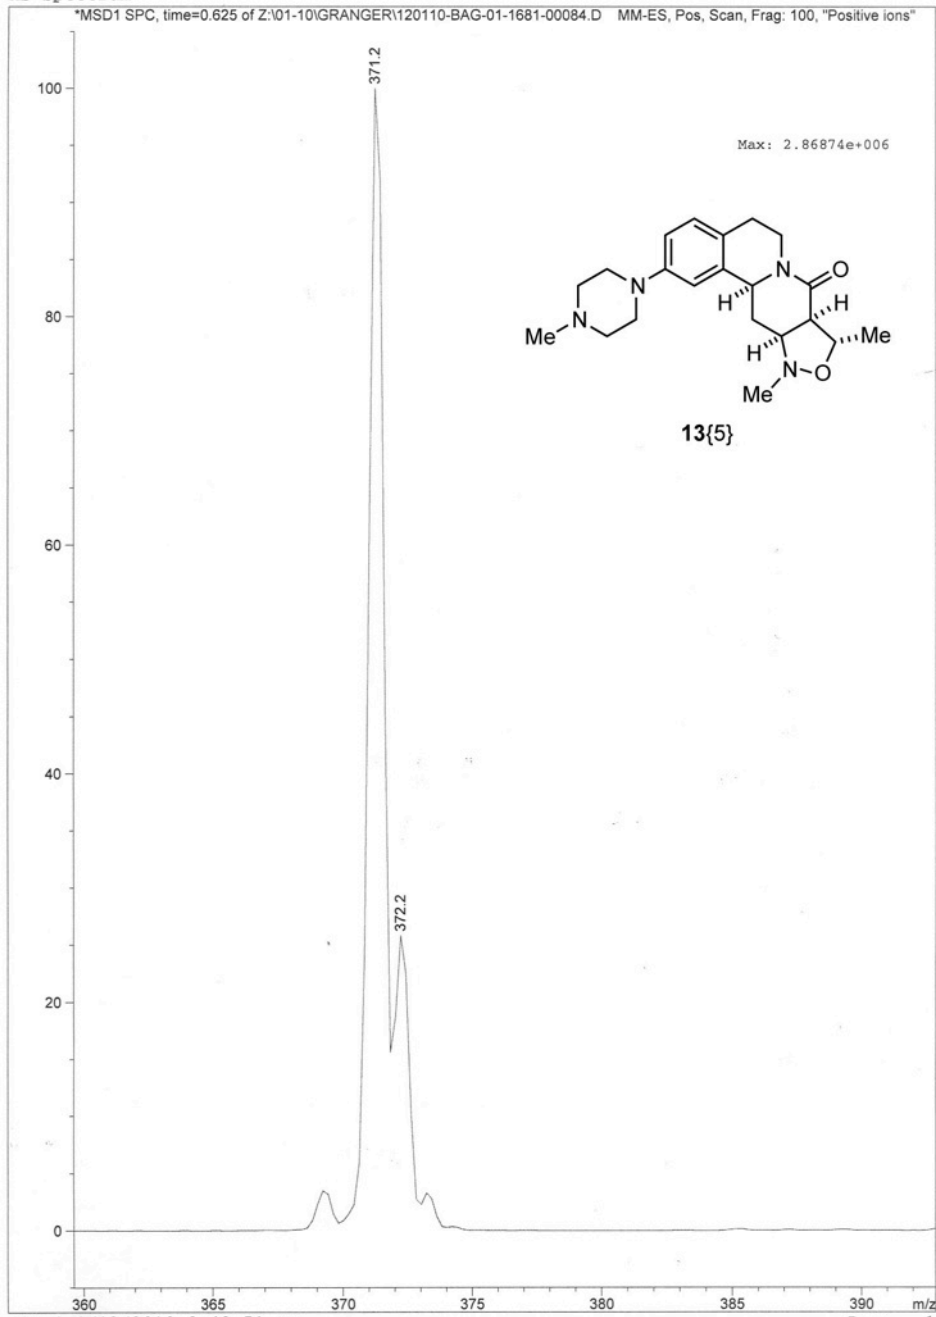



500 MHz mmr0  
 BAG-01-159  
 expd Carbon

| SAMPLE      |             | SPECIAL |        |
|-------------|-------------|---------|--------|
| date        | Jul 51 2009 | time    | 27.0   |
| solvent     | cdcl3       | gain    | 50     |
| file        | exp         | spin    | 20     |
| ACQUISITION | exp         | ntsc    | 0.008  |
| sv          | 30165.8     | nmr0    | 0      |
| at          | 18154       | atfpa   | 10.000 |
| np          | 17000       | 11      | n      |
| fb          | 2.00        | 1n      | y      |
| bs          | 16          | 1n      | y      |
| nt          | 4000        | hp      | n      |
| ct          | 2147        | hp      | n      |

  

| TRANSMITTER |         | PROCESSING |          |
|-------------|---------|------------|----------|
| qt          | 019     | 1b         | not used |
| sf          | 125.704 | fn         | DISP     |
| tof         | 1255.4  | sp         | -528.8   |
| tpw         | 53      | wp         | 25766.4  |
| pw          | 3.163   | ftf        | 1913.9   |
| DECOUPLER   | H1      | fd         | -25.8    |
| dm          | 0       | lp         | -198.8   |
| dof         | 0       | PLDT       |          |
| dmm         | yyy     | MC         | 250      |
| dmr         | 37      | vc         | 3233     |
| def         | 10582   | vs         |          |
| th          | at      | cdc        | ph       |

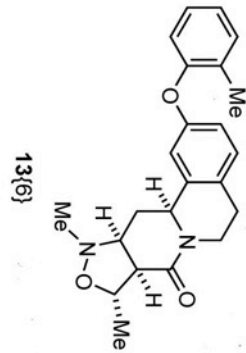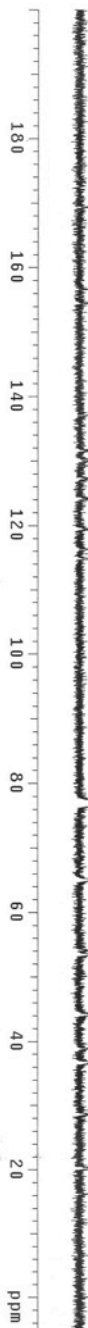

Data File L:\09-11\GRANGER\160911-SFM00421-13362.D  
 Sample Name: SFM0042

```

=====
Acq. Operator   : bretttag35@mail.utexas.edu
Acq. Instrument : LCMS                               Location : Vial 43
Injection Date  : 9/16/2011 11:47:44 PM
                                                    Inj Volume : 1.0 µl

Acq. Method     : C:\CHEM32\1\METHODS\SP_NIH.M
Last changed    : 9/16/2011 11:47:29 PM by bretttag35@mail.utexas.edu
                  (modified after loading)
Analysis Method : C:\CHEM32\1\METHODS\DEF_LC.M
Last changed    : 11/20/2006 4:14:44 AM
Sample Info     : Easy-Access Method: 'SP_NIH'
  
```

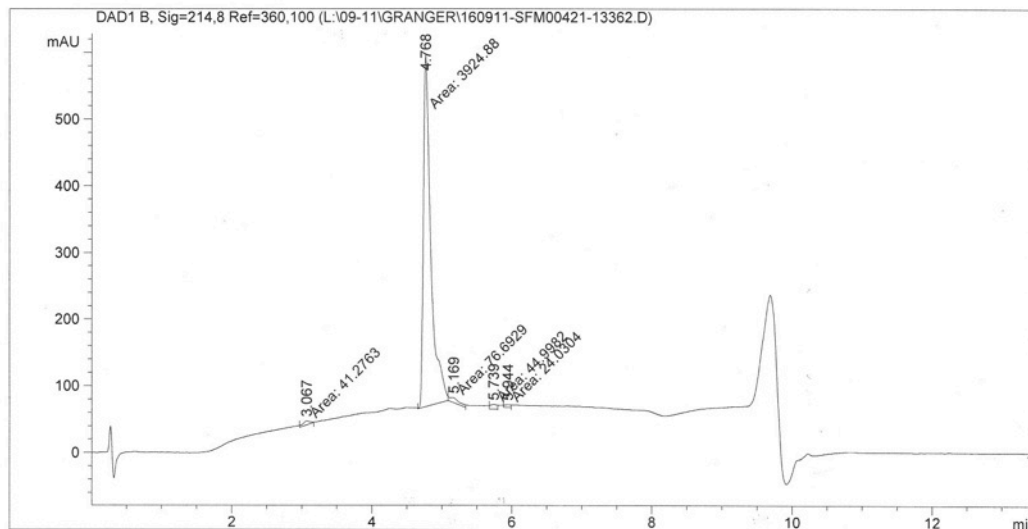

=====  
 Area Percent Report  
 =====

```

Sorted By      :      Signal
Multiplier:    :      1.0000
Dilution:      :      1.0000
Use Multiplier & Dilution Factor with ISTDs
  
```

Signal 1: DAD1 B, Sig=214,8 Ref=360,100

| Peak # | RetTime [min] | Type | Width [min] | Area [mAU*s] | Height [mAU] | Area %  |
|--------|---------------|------|-------------|--------------|--------------|---------|
| 1      | 3.067         | MM   | 0.1132      | 41.27634     | 6.07784      | 1.0038  |
| 2      | 4.768         | MM   | 0.1237      | 3924.88403   | 528.73779    | 95.4523 |
| 3      | 5.169         | MM   | 0.1719      | 76.69287     | 7.43584      | 1.8652  |
| 4      | 5.739         | MM   | 0.1087      | 44.99820     | 6.89999      | 1.0943  |
| 5      | 5.944         | MM   | 0.1012      | 24.03038     | 3.95608      | 0.5844  |

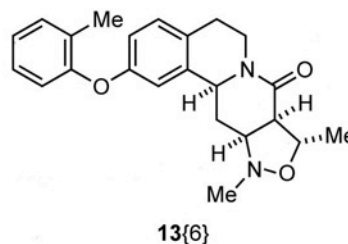

Print of window 79: MS Spectrum  
Data File : L:\09-11\GRANGER\160911-SFM00421-13362.D  
Sample Name : SFM0042

=====  
Acq. Operator : bretttag35@mail.utexas.edu  
Acq. Instrument : LCMS Location : Vial 43  
Injection Date : 9/16/2011 11:47:44 PM Inj : 1  
Inj Volume : 1.0 µl  
Acq. Method : C:\CHEM32\1\METHODS\SP\_NIH.M  
Last changed : 9/16/2011 11:47:29 PM by bretttag35@mail.utexas.edu  
(modified after loading)  
Analysis Method : C:\CHEM32\1\METHODS\DEF\_LC.M  
Last changed : 11/20/2006 4:14:44 AM  
Sample Info : Easy-Access Method: 'SP\_NIH'

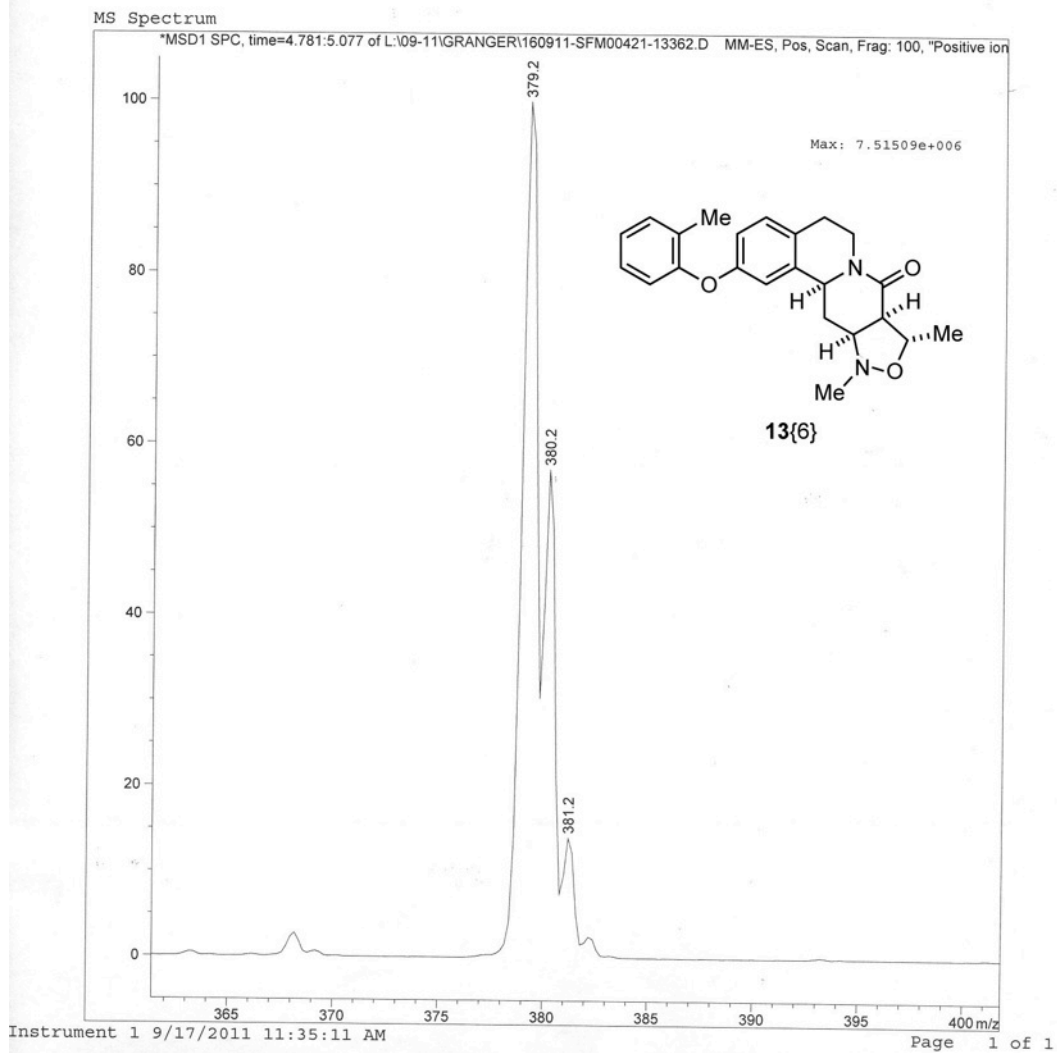

BAG-1-284

exp2 Proton

```
SAMPLE 27.0
date MAY 13 2010 temp
solvent cdcl3 gain
file exp hsq 0.008
ACQUISITION exp hsq 2.00
sp 7.004 hsq 15.000
at 4.005 atfa 6.600
np 84006 4000 11
fb 4000 11
bs 32 dn
d1 2.000 hs
nt 64 1b
ct TRANSMITTER H1 64 1b
td 499.402 sp 0.130
sfrq 499.402 sp 63336
tof 499.3 wp 5248.8
tpwr 55 rf1 4828.2
pw 2.530 rp 135.25
DECOUPLER C13 1p 4.13
dn 0 mc
dof 0 mn 240
dm 35 vs
dpmr 32258 th 2245
dnt at cdc ph 12
```

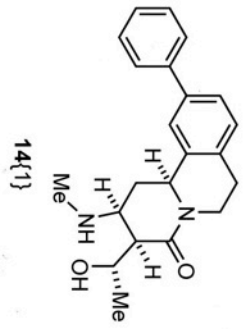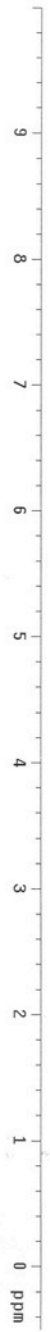





Data File L:\05-10\GRANGER\120510-BAG-1-2841-03364.D  
Sample Name: BAG-1-284

=====  
Acq. Operator : bretttag35@mail.utexas.edu  
Acq. Instrument : LCMS Location : Vial 16  
Injection Date : 5/12/2010 2:14:17 PM Inj Volume : 1.0 µl  
Acq. Method : C:\CHEM32\1\METHODS\SP\_NIH.M  
Last changed : 5/12/2010 2:14:01 PM by bretttag35@mail.utexas.edu  
(modified after loading)  
Analysis Method : C:\CHEM32\1\METHODS\DEF\_LC.M  
Last changed : 11/20/2006 4:14:44 AM  
Sample Info : Easy-Access Method: 'SP\_NIH'

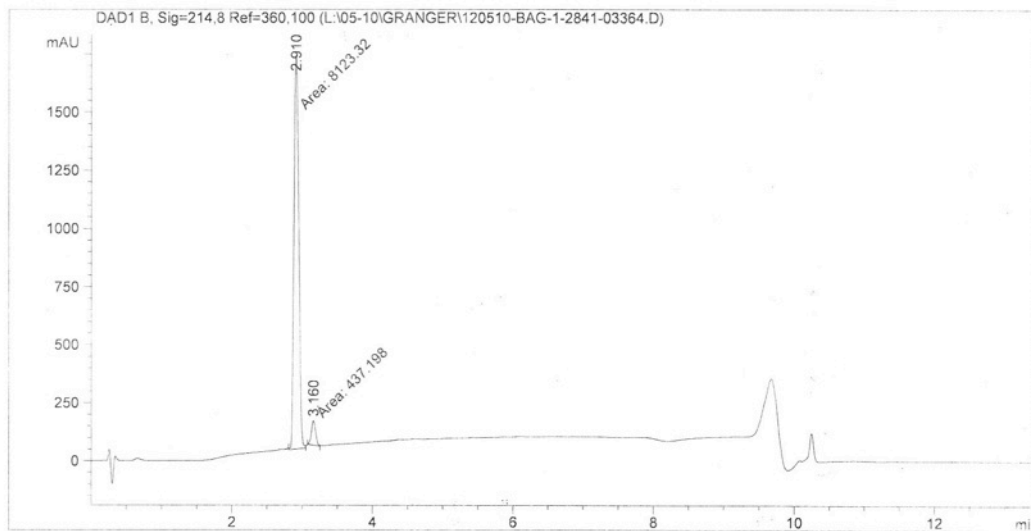

=====  
Area Percent Report  
=====

Sorted By : Signal  
Multiplier: : 1.0000  
Dilution: : 1.0000  
Use Multiplier & Dilution Factor with ISTDs

Signal 1: DAD1 B, Sig=214,8 Ref=360,100

| Peak # | RetTime [min] | Type | Width [min] | Area [mAU*s] | Height [mAU] | Area %  |
|--------|---------------|------|-------------|--------------|--------------|---------|
| 1      | 2.910         | MM   | 0.0796      | 8123.32373   | 1701.59070   | 94.8929 |
| 2      | 3.160         | MM   | 0.0693      | 437.19791    | 105.10128    | 5.1071  |

Totals : 8560.52164 1806.69198

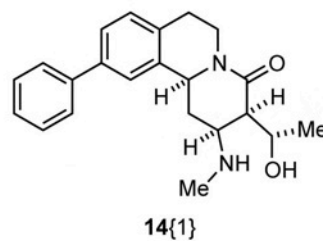

Print of window 79: MS Spectrum

Data File : L:\05-10\GRANGER\120510-BAG-1-2841-03364.D

Sample Name : BAG-1-284

Acq. Operator : bretttag35@mail.utexas.edu

Acq. Instrument : LCMS

Injection Date : 5/12/2010 2:14:17 PM

Location : Vial 16

Inj : 1

Inj Volume : 1.0 µl

Acq. Method : C:\CHEM32\1\METHODS\SP\_NIH.M

Last changed : 5/12/2010 2:14:01 PM by bretttag35@mail.utexas.edu  
(modified after loading)

Analysis Method : C:\CHEM32\1\METHODS\DEF\_LC.M

Last changed : 11/20/2006 4:14:44 AM

Sample Info : Easy-Access Method: 'SP\_NIH'

MS Spectrum

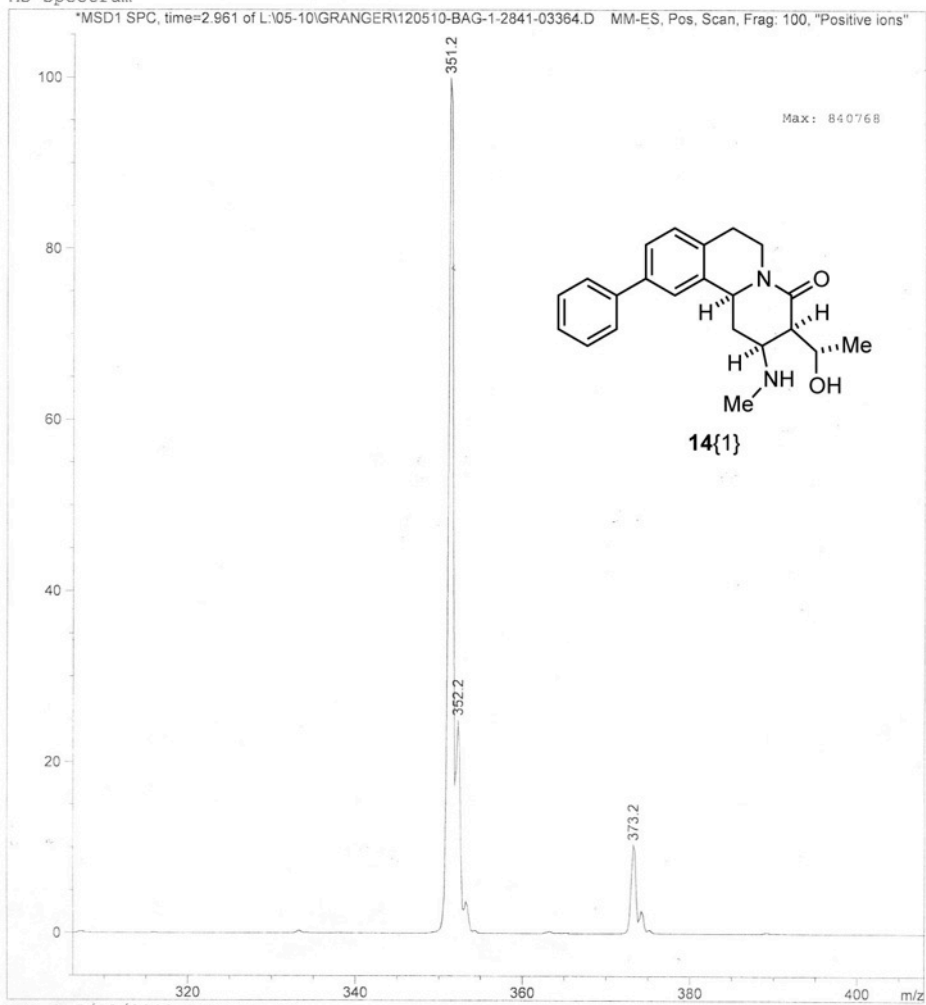

Instrument 1 5/12/2010 3:21:51 PM

Page 1 of 1



BAG-1-2086

exp4 Carbon

|           |                 |       |          |
|-----------|-----------------|-------|----------|
| date      | May 13 2010     | temp  | 27.0     |
| solvent   | cdcl3           | gain  | 50       |
| fl18      | exp             | spin  | 0.000    |
| sw        | 30143.2         | pw30  | 15.500   |
| at        | 1.082           | atfa  | 10.000   |
| np        | 64024           | flags | n        |
| nb        | 17080           | fl    | n        |
| hd        | 64              | hs    | y        |
| ss        | 64              | dp    | n        |
| d1        | 2.000           | hs    | n        |
| nt        | 800             | tp    | n        |
| ct        | 800             | fn    | not used |
| tn        | TRANSMITTER C13 | fn    | DISPLAY  |
| strq      | 125.587         | sp    | -628.1   |
| lort      | 125.412         | wp    | 21742.4  |
| lort      | 125.412         | wp    | 12142.1  |
| pw        | 8.000           | ffp   | 9669.2   |
| pw        | 8.000           | ffp   | -95.2    |
| DECOUPLER | H1              | tp    | -217.5   |
| dn        | 0               | PL0T  | 250      |
| dof       | 0               | wc    | 0        |
| ddm       | yy              | sc    | 0        |
| dmm       | 39              | vs    | 2084     |
| dpwr      | 12600           | th    | 5        |
| dwr       | 12600           | at    | cdc ph   |

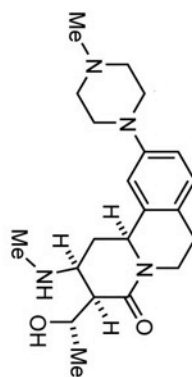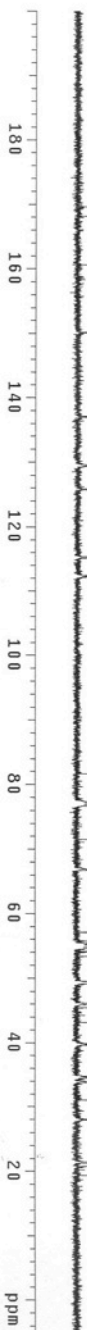

Data File L:\05-10\GRANGER\120510-BAG-1-2861-03370.D  
Sample Name: BAG-1-286

=====  
Acq. Operator : bretttag35@mail.utexas.edu  
Acq. Instrument : LCMS Location : Vial 22  
Injection Date : 5/12/2010 5:14:10 PM Inj Volume : 1.0 µl  
Acq. Method : C:\CHEM32\1\METHODS\SP\_NIH.M  
Last changed : 5/12/2010 5:13:56 PM by bretttag35@mail.utexas.edu  
(modified after loading)  
Analysis Method : C:\CHEM32\1\METHODS\DEF\_LC.M  
Last changed : 11/20/2006 4:14:44 AM  
Sample Info : Easy-Access Method: 'SP\_NIH'

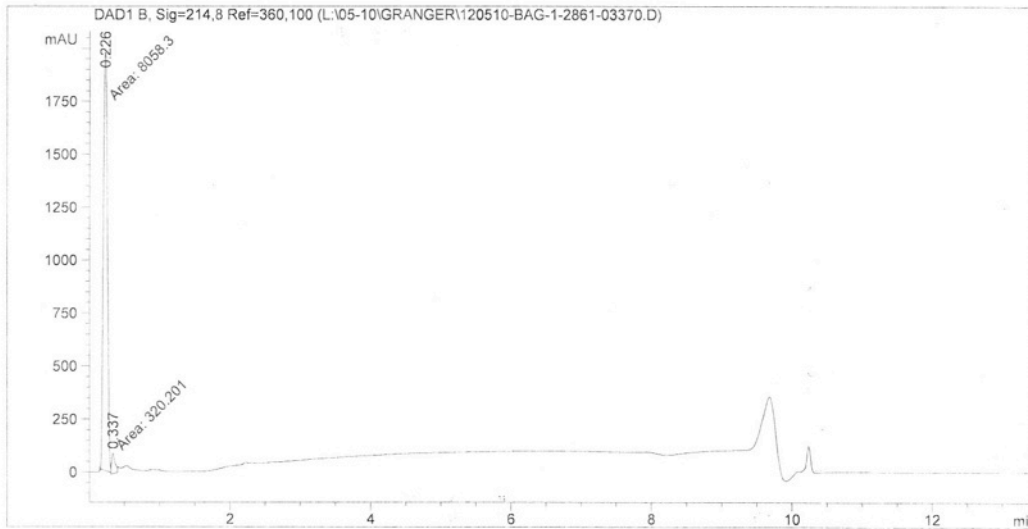

=====  
Area Percent Report  
=====

Sorted By : Signal  
Multiplier: : 1.0000  
Dilution: : 1.0000  
Use Multiplier & Dilution Factor with ISTDs

Signal 1: DAD1 B, Sig=214,8 Ref=360,100

| Peak # | RetTime [min] | Type | Width [min] | Area [mAU*s] | Height [mAU] | Area %  |
|--------|---------------|------|-------------|--------------|--------------|---------|
| 1      | 0.226         | MM   | 0.0675      | 8058.30127   | 1988.87952   | 96.1783 |
| 2      | 0.337         | MM   | 0.0551      | 320.20087    | 96.86745     | 3.8217  |

Totals : 8378.50214 2085.74697

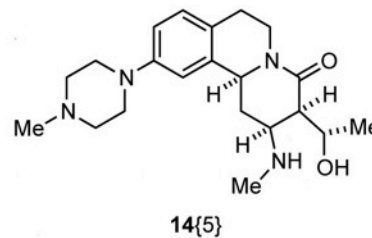

Print of window 79: MS Spectrum  
Data File : L:\05-10\GRANGER\120510-BAG-1-2861-03370.D  
Sample Name : BAG-1-286

=====  
Acq. Operator : bretttag35@mail.utexas.edu  
Acq. Instrument : LCMS Location : Vial 22  
Injection Date : 5/12/2010 5:14:10 PM Inj : 1  
Inj Volume : 1.0 µl  
Acq. Method : C:\CHEM32\1\METHODS\SP\_NIH.M  
Last changed : 5/12/2010 5:13:56 PM by bretttag35@mail.utexas.edu  
(modified after loading)  
Analysis Method : C:\CHEM32\1\METHODS\DEF\_LC.M  
Last changed : 11/20/2006 4:14:44 AM  
Sample Info : Easy-Access Method: 'SP\_NIH'

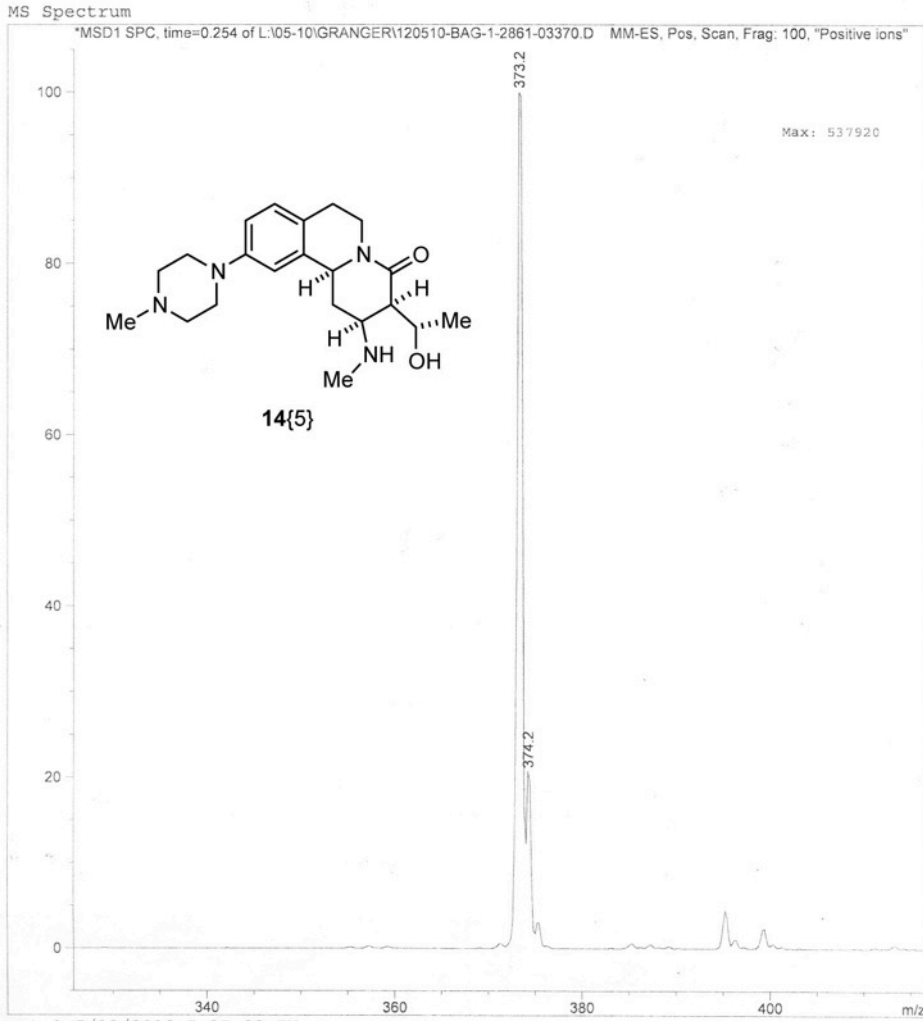

600 MHz nmrox  
 BA0-01-253-clean  
 exp1 Proton  
 SAMPLE date Oct 20 2009 temp 27.0  
 file ent cde exp hst 0.008  
 ACQUISITION sw 9615.4 pw90 11.600  
 at 76920 a1fa 10.000  
 fb 4000 i1 n  
 bs 32 in n  
 d1 2.000 dp hs  
 ct TRANSMITTER H1 1b PROCESSING 0.10  
 tn H1 fn DISPLAY 262144  
 srfq 598.453 sp -239.9  
 tpr 61 wp 6237.3  
 pw 1.938 fti 1198.9  
 DECOUPLER C13 ffp 125.0  
 ddor tp 132.2  
 dm mnn PLOT 250  
 dmm c wc sc 0  
 dpvr 37 sc 0  
 dmf 35088 th 332  
 ai cdc ph

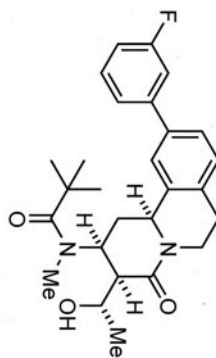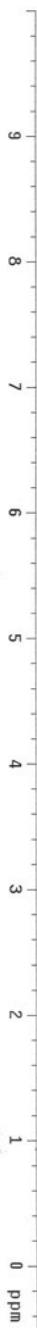





Data File L:\09-11\GRANGER\160911-SFM00481-13363.D  
Sample Name: SFM0048

=====  
Acq. Operator : brettag35@mail.utexas.edu  
Acq. Instrument : LCMS Location : Vial 44  
Injection Date : 9/17/2011 12:02:44 AM Inj Volume : 1.0 µl  
Acq. Method : C:\CHEM32\1\METHODS\SP\_NIH.M  
Last changed : 9/17/2011 12:02:29 AM by brettag35@mail.utexas.edu  
(modified after loading)  
Analysis Method : C:\CHEM32\1\METHODS\DEF\_LC.M  
Last changed : 11/20/2006 4:14:44 AM  
Sample Info : Easy-Access Method: 'SP\_NIH'

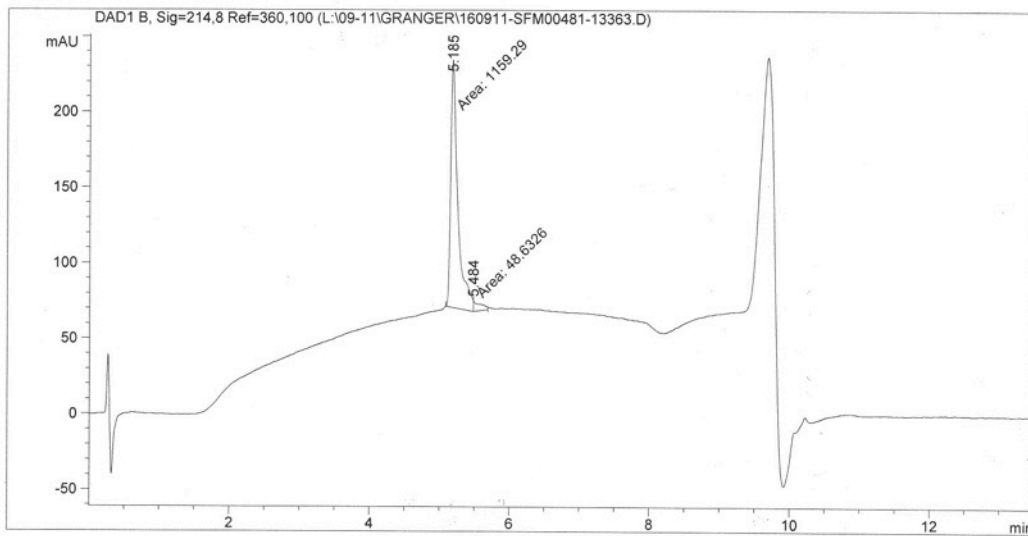

=====  
Area Percent Report  
=====

Sorted By : Signal  
Multiplier: : 1.0000  
Dilution: : 1.0000  
Use Multiplier & Dilution Factor with ISTDs

Signal 1: DAD1 B, Sig=214,8 Ref=360,100

| Peak # | RetTime [min] | Type | Width [min] | Area [mAU*s] | Height [mAU] | Area %  |
|--------|---------------|------|-------------|--------------|--------------|---------|
| 1      | 5.185         | MM   | 0.1174      | 1159.29321   | 164.63277    | 95.9739 |
| 2      | 5.484         | MM   | 0.1018      | 48.63261     | 7.05262      | 4.0261  |

Totals : 1207.92582 171.68539

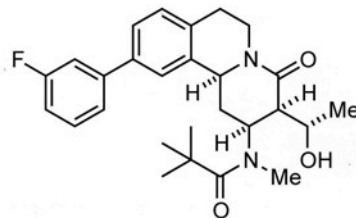

16{3,1}

Print of window 79: MS Spectrum  
Data File : L:\09-11\GRANGER\160911-SFM00481-13363.D  
Sample Name : SFM0048

=====  
Acq. Operator : bretttag35@mail.utexas.edu  
Acq. Instrument : LCMS Location : Vial 44  
Injection Date : 9/17/2011 12:02:44 AM Inj : 1  
Inj Volume : 1.0 µl  
Acq. Method : C:\CHEM32\1\METHODS\SP\_NIH.M  
Last changed : 9/17/2011 12:02:29 AM by bretttag35@mail.utexas.edu  
(modified after loading)  
Analysis Method : C:\CHEM32\1\METHODS\DEF\_LC.M  
Last changed : 11/20/2006 4:14:44 AM  
Sample Info : Easy-Access Method: 'SP\_NIH'

MS Spectrum

MSD1 SPC, time=5.1365358 of L:\09-11\GRANGER\160911-SFM00481-13363.D MM-ES, Pos, Scan, Frag: 100, "Positive ion"

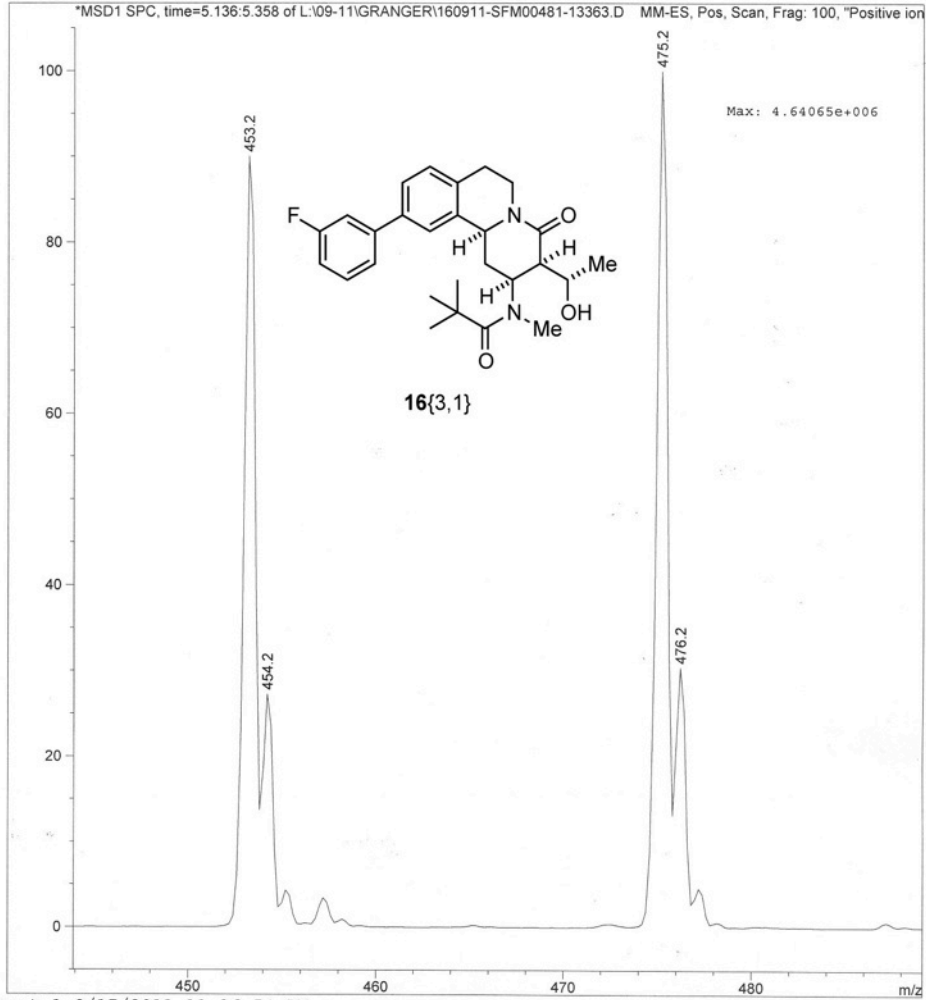



600 MHz NMR  
BAG-1-229-3

exp4 Carbon  
SAMPLE  
date Feb 1 2010 temp 27.0  
solvent cdcl3 gain 40  
file 408322.6 ps30 6.20  
sw ACQUISITION exp ps30 7.800  
at 2.000 at1a 10.000  
np 161290 11 FLAGS  
fd 17000 11  
di 2.000 11  
nt 10000 hs  
ct 10000  
TRANSMITTER c13 fb PROCESSING  
tn 150.824 fn 0.50  
sfrq 2296.3 sp DISPLAY  
tof 58 wp1 -754.3  
pw 2.600 ffd 33831.4  
DECOUPLER H1 tp 202.3  
dm 0 yyy mc 21.4  
dms 46 vs PLOT 250  
dpr 15337 th 75283  
at cdc ph 68

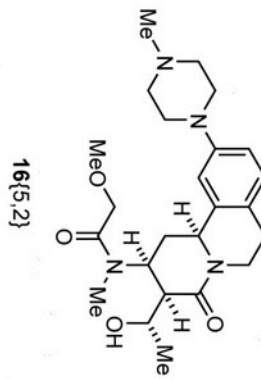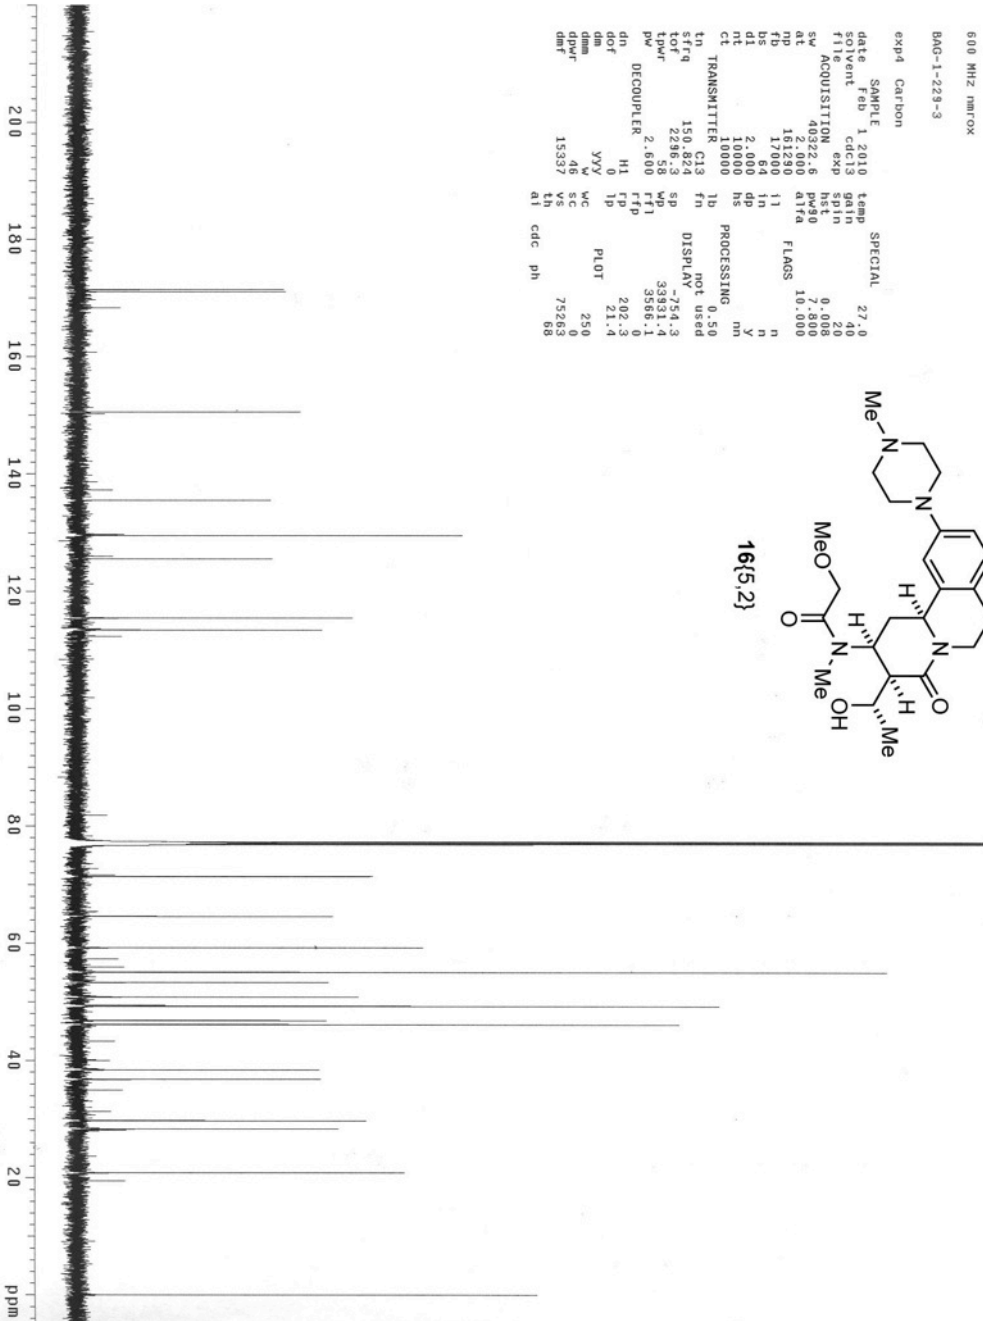

Data File Z:\01-10\GRANGER\120110-BAG-01-299-31-00082.D  
 Sample Name: BAG-01-299-3

```

=====
Acq. Operator   : brettag35@gmail.com
Acq. Instrument : LCMS
Injection Date  : 1/12/2010 8:40:32 PM
Location       : Vial 83
Inj Volume     : 1.0 µl

Acq. Method    : C:\CHEM32\1\METHODS\SP_NIH.M
Last changed   : 1/12/2010 8:40:21 PM by brettag35@gmail.com
                (modified after loading)
Analysis Method: C:\CHEM32\1\METHODS\DEF_LC.M
Last changed   : 11/20/2006 4:14:44 AM
Sample Info    : Easy-Access Method: 'SP_NIH'
  
```

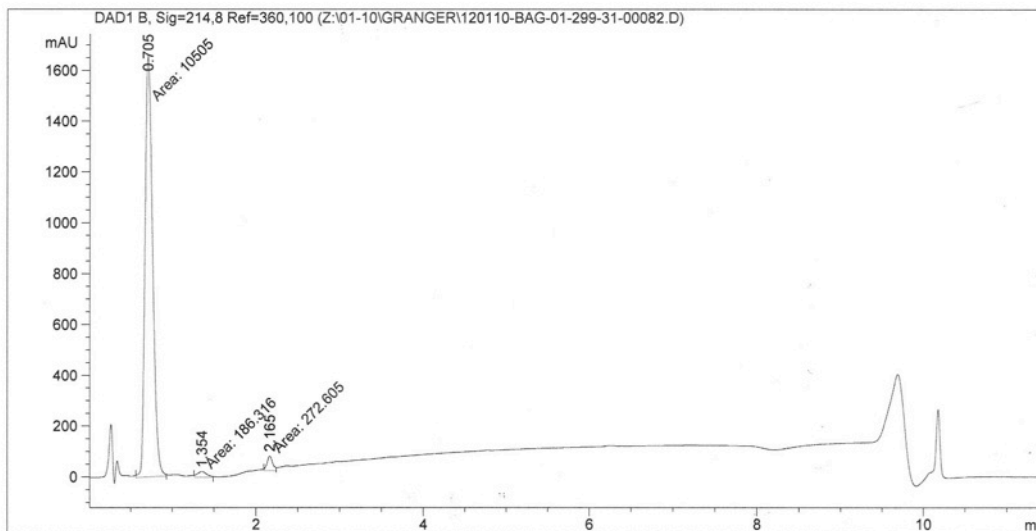

Area Percent Report

```

Sorted By      :      Signal
Multiplier:    :      1.0000
Dilution:      :      1.0000
Use Multiplier & Dilution Factor with ISTDs
  
```

Signal 1: DAD1 B, Sig=214,8 Ref=360,100

| Peak # | RetTime [min] | Type | Width [min] | Area [mAU*s] | Height [mAU] | Area %  |
|--------|---------------|------|-------------|--------------|--------------|---------|
| 1      | 0.705         | MM   | 0.1055      | 1.05050e4    | 1660.28857   | 95.8143 |
| 2      | 1.354         | MM   | 0.1374      | 186.31616    | 22.59595     | 1.6994  |
| 3      | 2.165         | MM   | 0.0779      | 272.60535    | 58.30742     | 2.4864  |

Totals : 1.09639e4 1741.19193

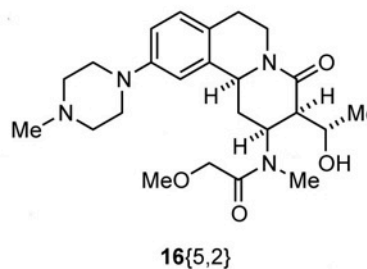

Print of window 79: MS Spectrum

MS Spectrum

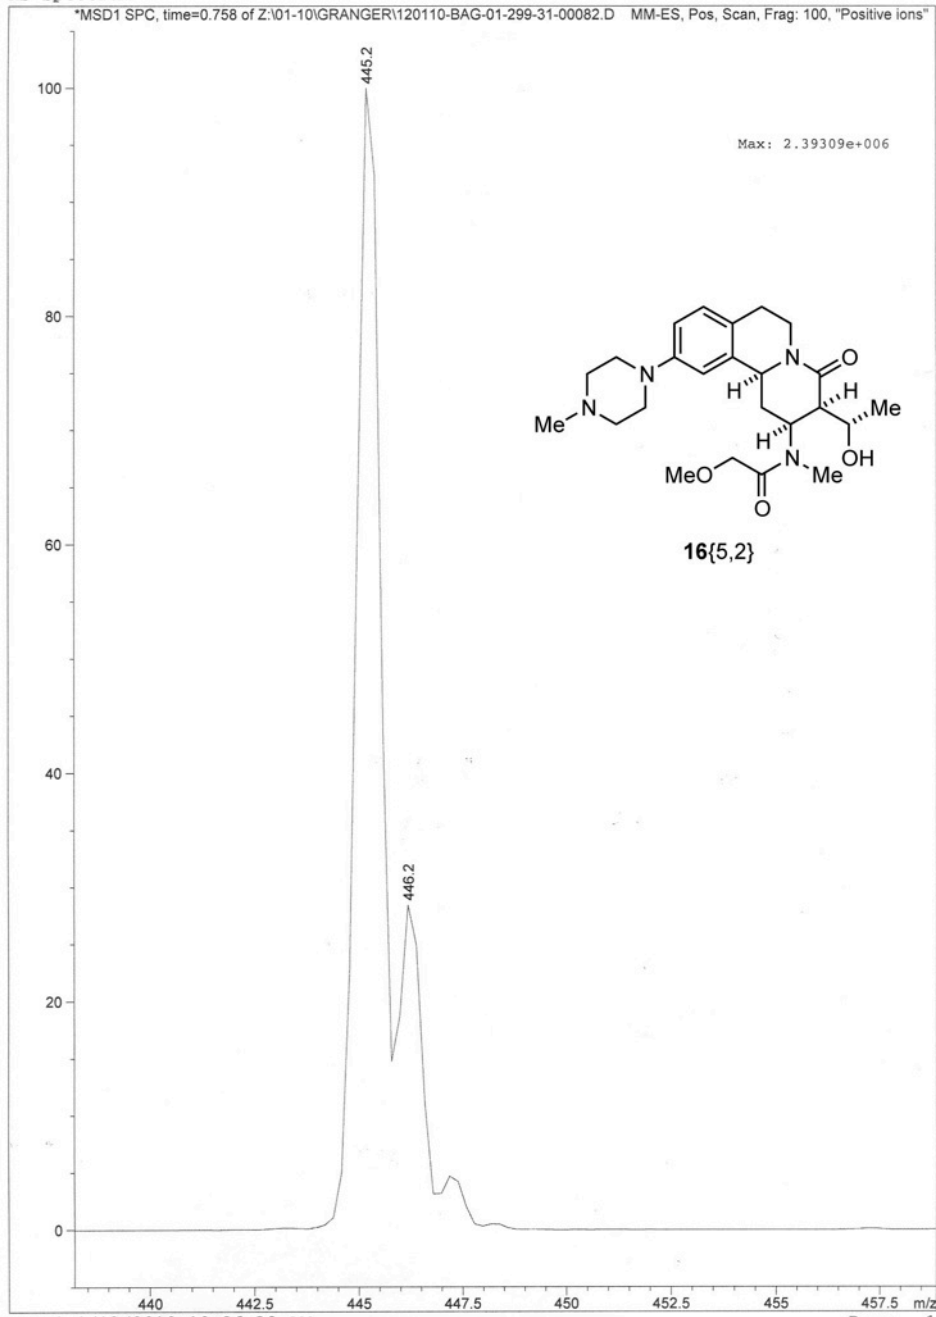

Instrument 1 1/13/2010 10:26:39 AM

Page 1 of 1

BAG-2-57-1

expt1 Proton

```
SAMPLE 27.10 SPECIAL
date Mar 15 2010 temp
solvent cdc13 gain 30
file 7100.4 hsq 20
ACQUISITION exp hsq 0.088
at 4.005 6174 15.530 16.160
np 64006 4000 11
fb 4000 32
bs 32 dn
dt 2.000 hs
nt 64 1b
ct TRANSMITTER H1 64 1b PROCESSING 0.10
td 499.402 H1 fn 63536
sfreq 499.402 sp -249.7 DISPLAY
tof 499.3 wp 5283.5
tpwr 55 rf1 1000.5
pw 2.550 f2p 111.8
DECOUPLER C13 1p 4.0
dn 0 PLOT
dof 0 mn 25.9
dm 0 mc 4008
sm 35 vs 4008
dpr 32258 th 12
at cdc ph
```

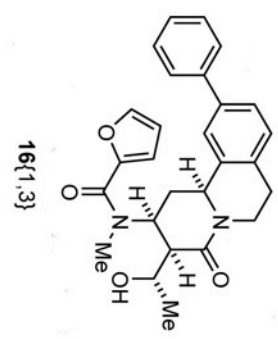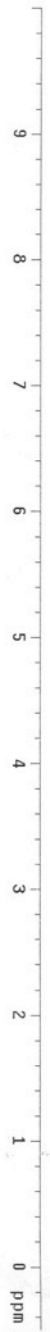



BAG-2-57-1

exp4 Carbon

SAMPLE 27.0  
date Mar 15 2010 temp  
solvent Mar cdc13 gain 50  
file ACQUISITION exp hsb 0.008  
sp 1.062 p1f4 10.000  
at 64024 17000 11  
mp 64024 17000 11  
bs 64 1n  
s 64 1n  
nt 2.000 hs  
ct 2000 1b  
TRANSMITTER C13 fn DISPLA not used  
t0 125.587 sp -628.3  
tof 1254.2 wp 25742.4  
tpwr 5.1 f1 1915.2  
pw 8.000 f2 -2.4  
dn DECOUPLER H1 1p PLOT -227.1  
dof 0  
dm yy mc 250  
sm 39  
dpr 10392  
daf 12800 at cdc ph 68

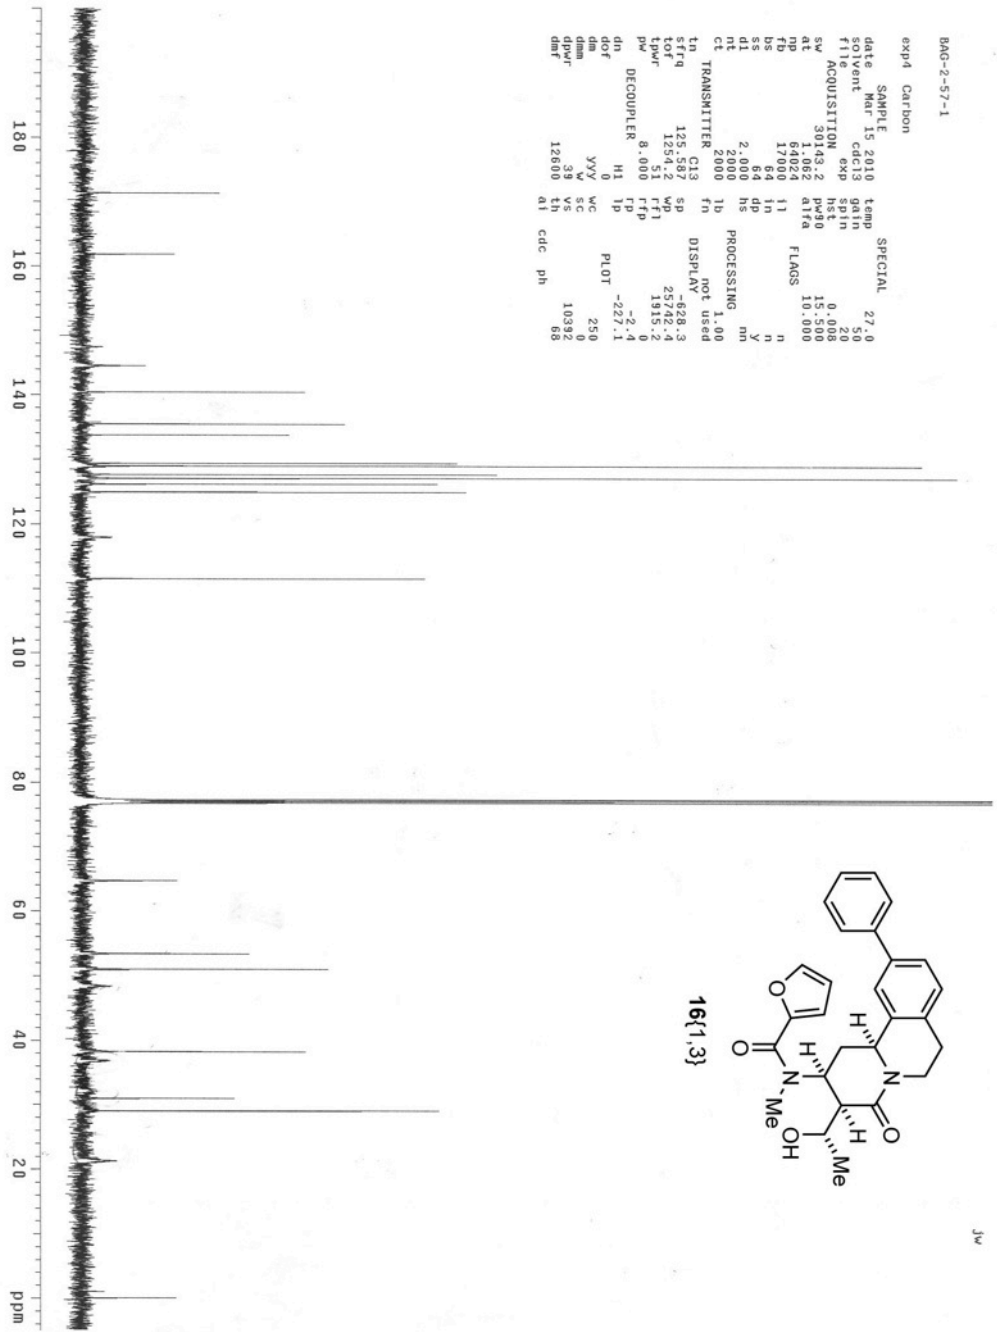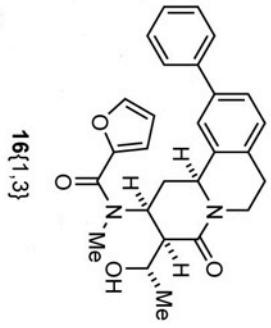

Jw

Data File Z:\03-10\GRANGER\030310-BAG-2-57-11-01795.D  
 Sample Name: BAG-2-57-1

```

=====
Acq. Operator   : bretttag35@mail.utexas.edu
Acq. Instrument : LCMS                               Location : Vial 30
Injection Date  : 3/3/2010 9:01:24 PM
Inj Volume     : 1.0 µl

Acq. Method    : C:\CHEM32\1\METHODS\SP_NIH.M
Last changed   : 3/3/2010 9:01:13 PM by bretttag35@mail.utexas.edu
                (modified after loading)
Analysis Method: C:\CHEM32\1\METHODS\DEF_LC.M
Last changed   : 3/4/2010 9:46:25 AM
                (modified after loading)
Sample Info    : Easy-Access Method: 'SP_NIH'
=====
  
```

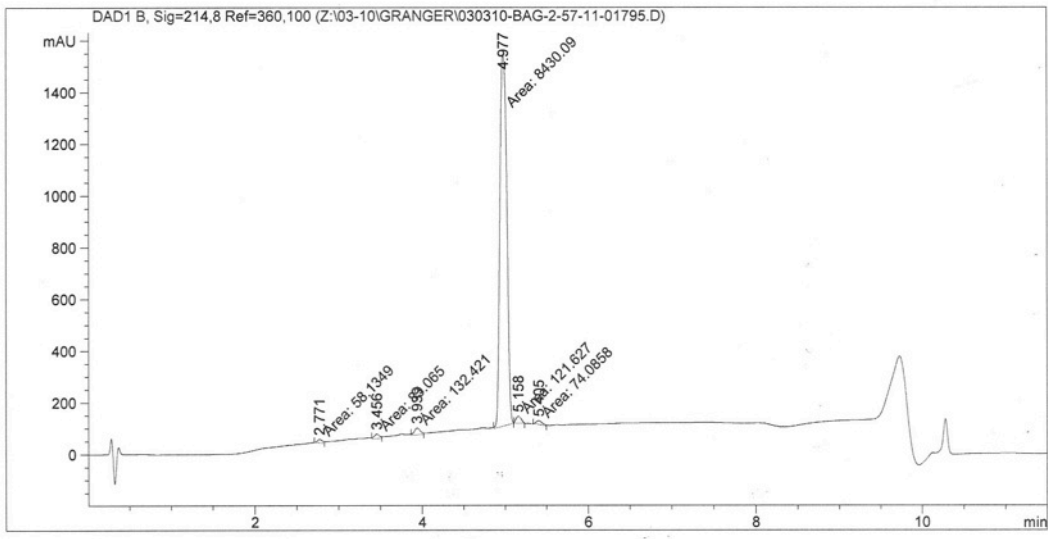

Area Percent Report

```

Sorted By      :      Signal
Multiplier:    :      1.0000
Dilution:      :      1.0000
Use Multiplier & Dilution Factor with ISTDs
  
```

Signal 1: DAD1 B, Sig=214,8 Ref=360,100

| Peak # | RetTime [min] | Type | Width [min] | Area [mAU*s] | Height [mAU] | Area %  |
|--------|---------------|------|-------------|--------------|--------------|---------|
| 1      | 2.771         | MM   | 0.0725      | 58.13486     | 13.36314     | 0.6532  |
| 2      | 3.456         | MM   | 0.0758      | 83.06499     | 18.27118     | 0.9334  |
| 3      | 3.939         | MM   | 0.0844      | 132.42076    | 26.14830     | 1.4880  |
| 4      | 4.977         | MM   | 0.0975      | 8430.08887   | 1441.72473   | 94.7262 |
| 5      | 5.158         | MM   | 0.0737      | 121.62691    | 27.50731     | 1.3667  |

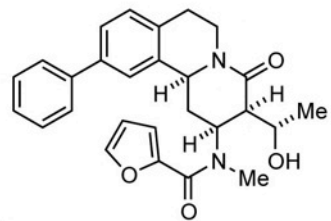

16(1,3)

Print of window 79: MS Spectrum  
Data File : Z:\03-10\GRANGER\030310-BAG-2-57-11-01795.D  
Sample Name : BAG-2-57-1

=====  
Acq. Operator : bretttag35@mail.utexas.edu  
Acq. Instrument : LCMS Location : Vial 30  
Injection Date : 3/3/2010 9:01:24 PM Inj : 1  
Inj Volume : 1.0 µl  
  
Acq. Method : C:\CHEM32\1\METHODS\SP\_NIH.M  
Last changed : 3/3/2010 9:01:13 PM by bretttag35@mail.utexas.edu  
(modified after loading)  
Analysis Method : C:\CHEM32\1\METHODS\DEF\_LC.M  
Last changed : 3/4/2010 9:46:25 AM  
(modified after loading)  
Sample Info : Easy-Access Method: 'SP\_NIH'

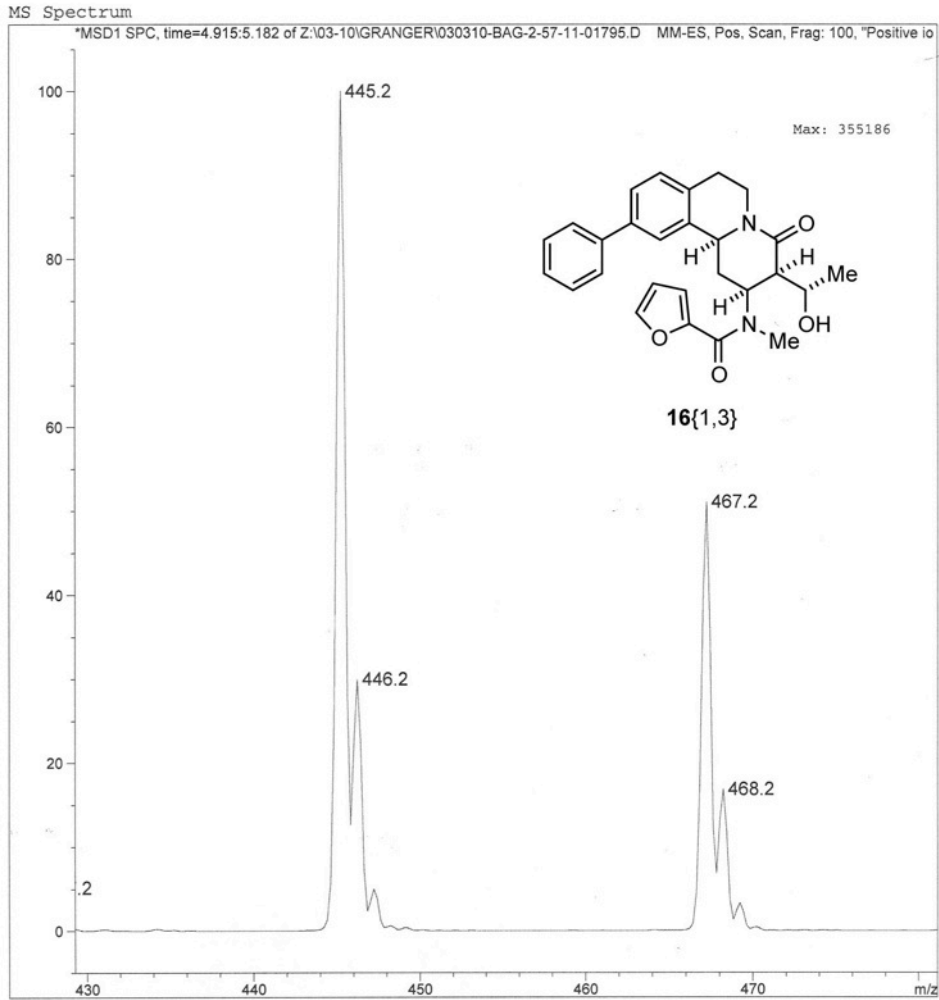

Instrument 1 3/4/2010 3:02:06 PM

Page 1 of 1

Archive directory:  
 Sample directory:  
 Pulse Sequence: s2pu1  
 Solvent: CDCl3  
 Ambient temperature  
 File: BAC-2-57-2-s2pu1\_H1  
 INOVA-500 "nmr1roy"  
 Relax: delay 2.000 sec  
 Acq: time 4.000 sec  
 Width 6410.3 Hz  
 64 repetitions  
 99.8017088 MHz  
 DATA PROCESSING  
 Line broadening 0.1 Hz  
 FI size 65536  
 Total time 6 min, 36 sec

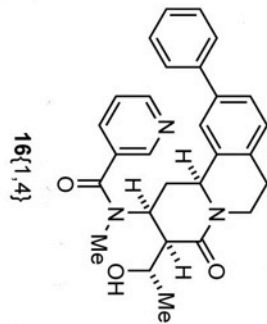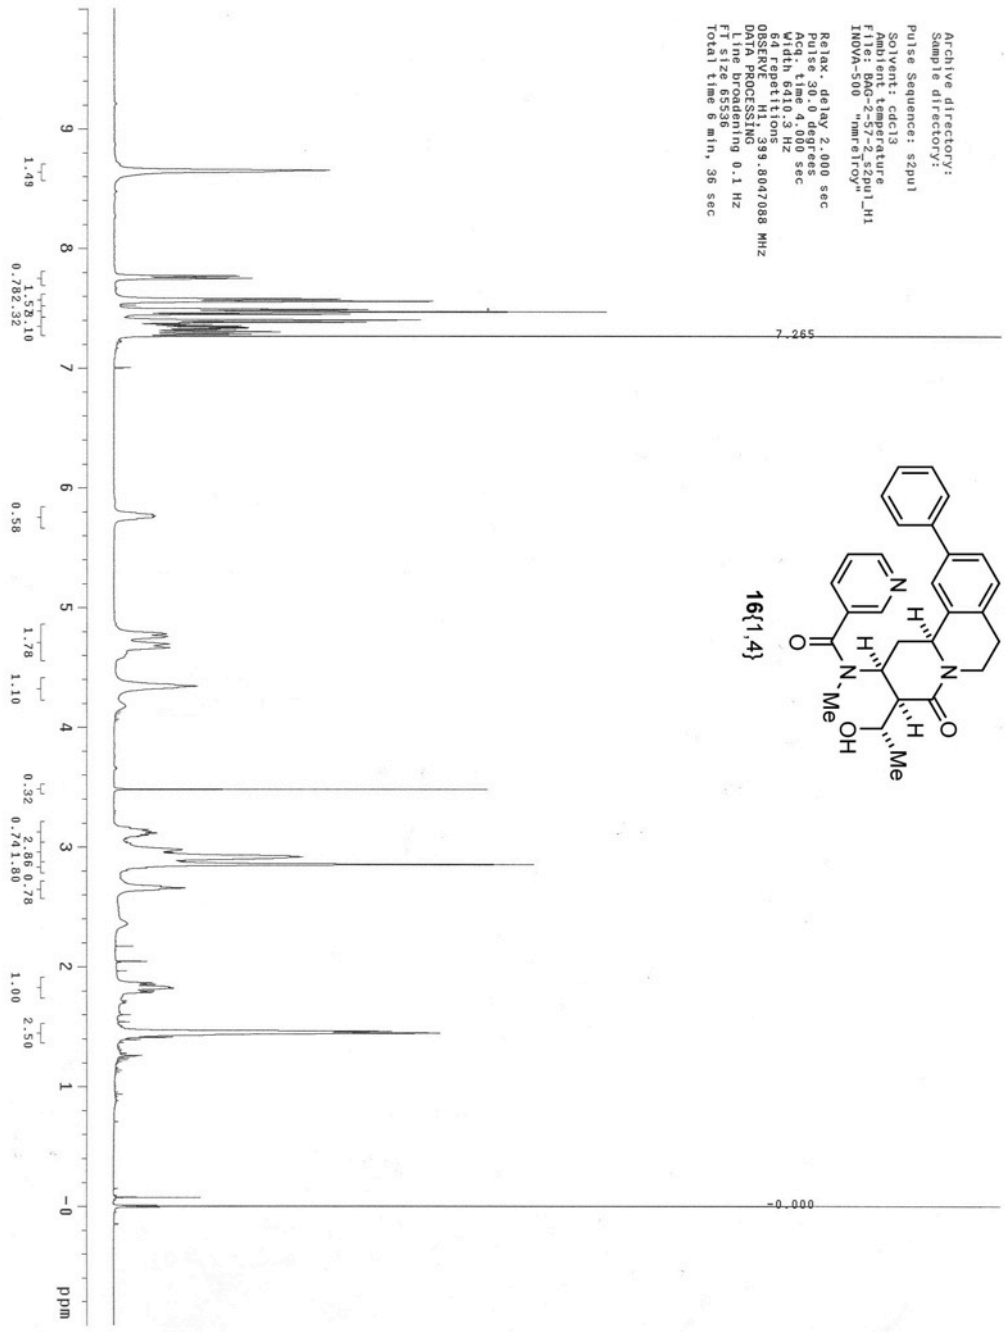



Data File L:\03-10\GRANGER\200310-BAG-2-57-21-02316.D  
 Sample Name: BAG-2-57-2

```

=====
Acq. Operator   : bretttag35@mail.utexas.edu
Acq. Instrument : LCMS                               Location : Vial 30
Injection Date  : 3/20/2010 2:10:54 PM
                                                    Inj Volume : 1.0 µl

Acq. Method     : C:\CHEM32\1\METHODS\SP_NIH.M
Last changed    : 3/20/2010 2:10:42 PM by bretttag35@mail.utexas.edu
                  (modified after loading)

Analysis Method : C:\CHEM32\1\METHODS\DEF_LC.M
Last changed    : 11/20/2006 4:14:44 AM
Sample Info     : Easy-Access Method: 'SP_NIH'
=====
  
```

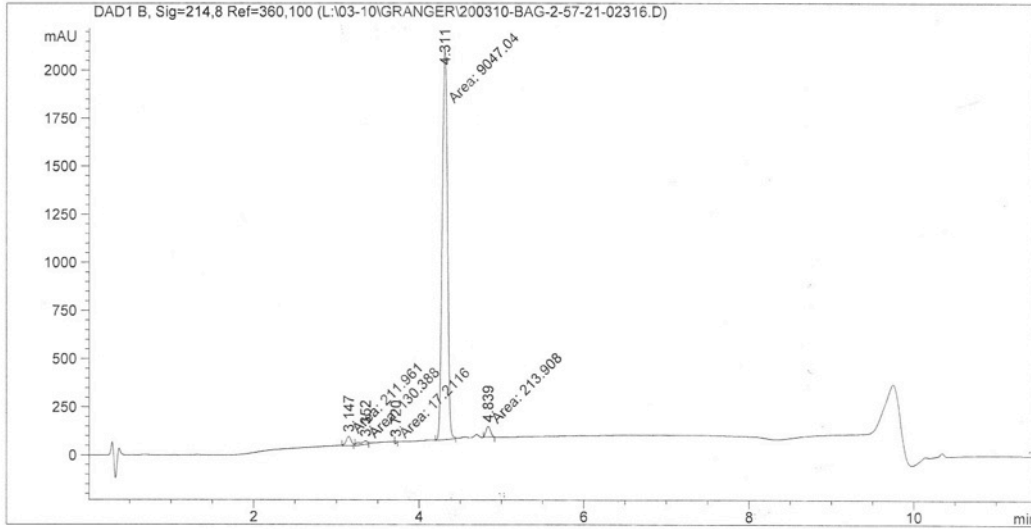

=====  
 Area Percent Report  
 =====

```

Sorted By      :      Signal
Multiplier:    :      1.0000
Dilution:      :      1.0000
Use Multiplier & Dilution Factor with ISTDs
  
```

Signal 1: DAD1 B, Sig=214,8 Ref=360,100

| Peak # | RetTime [min] | Type | Width [min] | Area [mAU*s] | Height [mAU] | Area %  |
|--------|---------------|------|-------------|--------------|--------------|---------|
| 1      | 3.147         | MM   | 0.0702      | 211.96133    | 50.29136     | 2.2032  |
| 2      | 3.352         | MM   | 0.1167      | 130.38808    | 18.62537     | 1.3553  |
| 3      | 3.720         | MM   | 0.0251      | 17.21155     | 11.40865     | 0.1789  |
| 4      | 4.311         | MM   | 0.0740      | 9047.04102   | 2038.54919   | 94.0391 |
| 5      | 4.839         | MM   | 0.0638      | 213.90776    | 55.88526     | 2.2235  |

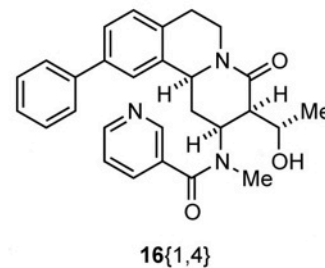

MS Spectrum

MSD1 SPC, time=4.294:4.383 of L:\03-10\GRANGER\200310-BAG-2-57-21-02316.D MM-ES, Pos, Scan, Frag: 100, "Positive i

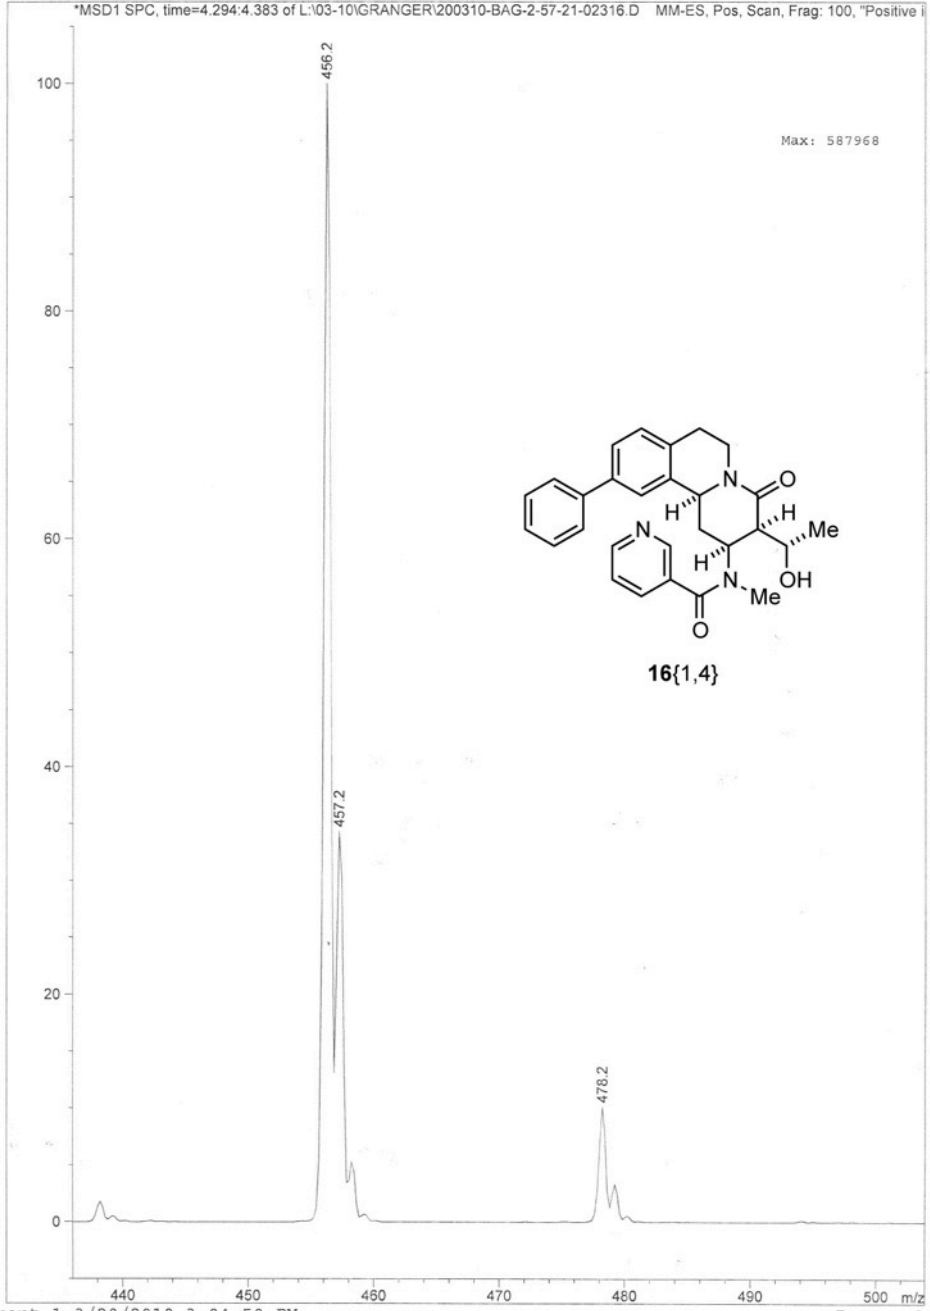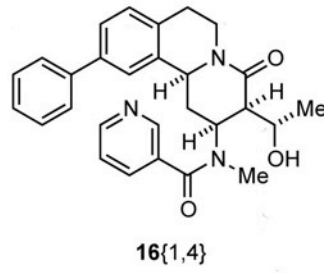

BAG-1-299-2  
 Pulse Sequence: szpu1  
 Solvent: CDCl3  
 Ambient Temperature  
 Mercury-400BBB "hmr6"  
 Relax delay 2.000 sec  
 Pulse 16.4 degrees  
 Acq. time 2.856 sec  
 Width 5802.2 Hz  
 SFO 400.147000 MHz  
 ONSERVE 1  
 DATA PROCESSING  
 Line broadening 0.1 Hz  
 FT size 32768  
 Total time 2 min, 40 sec

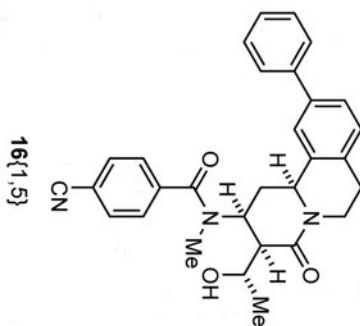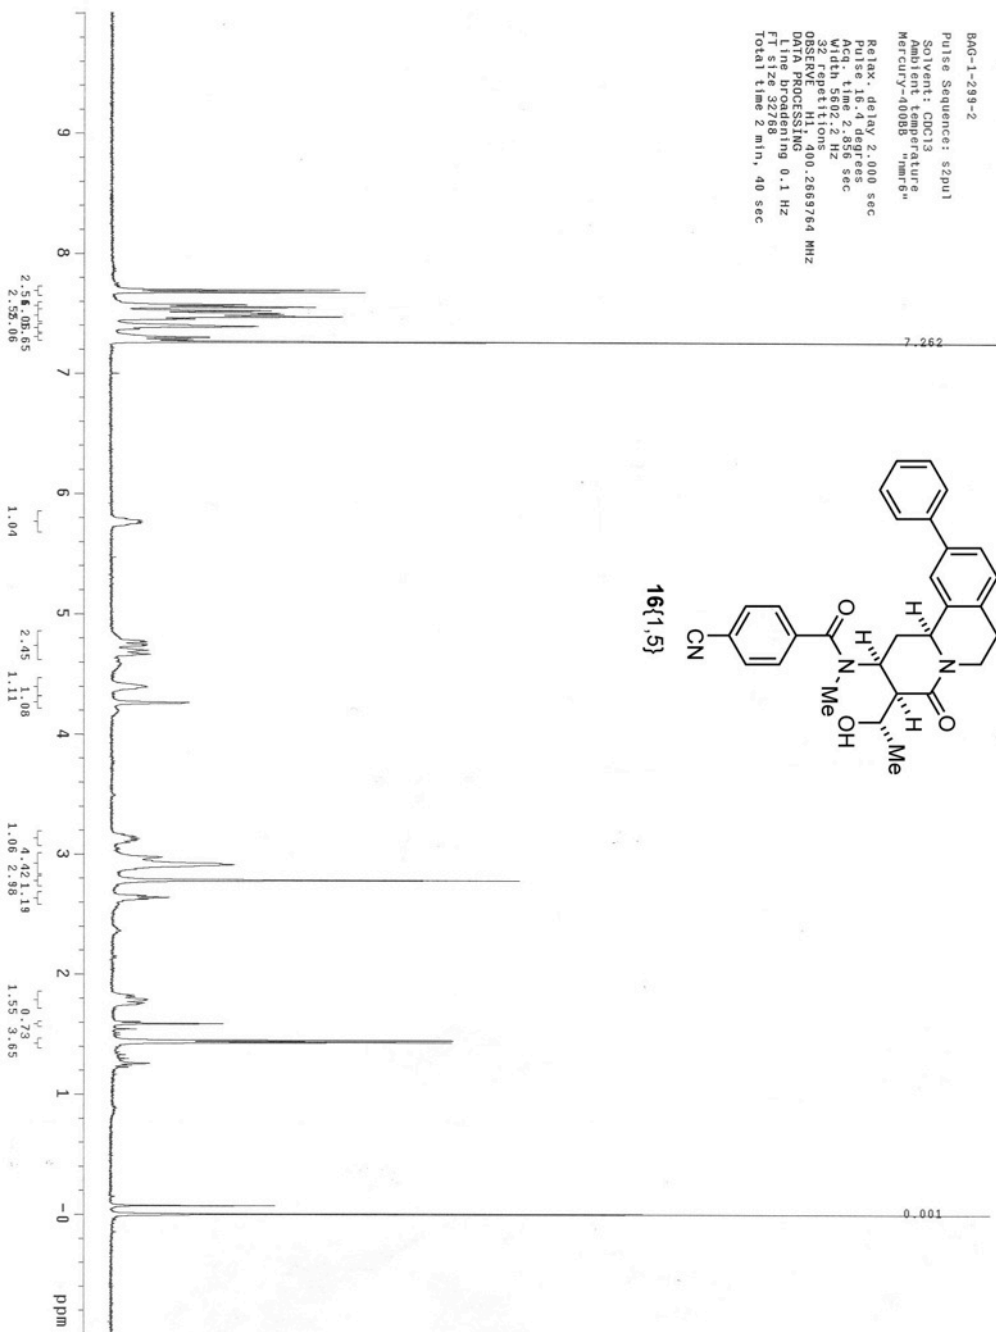



BAG-1-239-2

exp2 Carbon

|             |                 |      |          |
|-------------|-----------------|------|----------|
| date        | May 10 2010     | temp | 27.0     |
| solvent     | cdcl3           | gain | 50       |
| file        | exp             | spin | 20       |
| ACQUISITION | exp             | hs10 | 0.008    |
| su          | 301.062         | at10 | 10.000   |
| at          | 1.062           | at10 | 10.000   |
| np          | 64024           | 11   | n        |
| fb          | 17000           | 11   | n        |
| bs          | 64              | dn   | n        |
| di          | 2.000           | hs   | m        |
| nt          | 17000           | 1b   | 1.00     |
| ct          | 17000           | fn   | not used |
| td          | TRANSMITTER C13 | sp   | -628.3   |
| sfreq       | 125.587         | wp   | 25742.4  |
| tof         | 1254.2          | f1   | 2044.0   |
| tpwr        | 51              | f2   | -88.5    |
| pw          | 8.000           | f3   | -229.9   |
| DECOUPLER   | H1              | 1p   |          |
| dn          | 0               | PL0T | 250      |
| dofr        | yy              | vc   | 27135    |
| dm          | 39              | vs   | 12800    |
| sm          | 39              | th   | at       |
| dpwr        | 12800           | cdc  | ph       |
| daf         |                 |      | 10       |

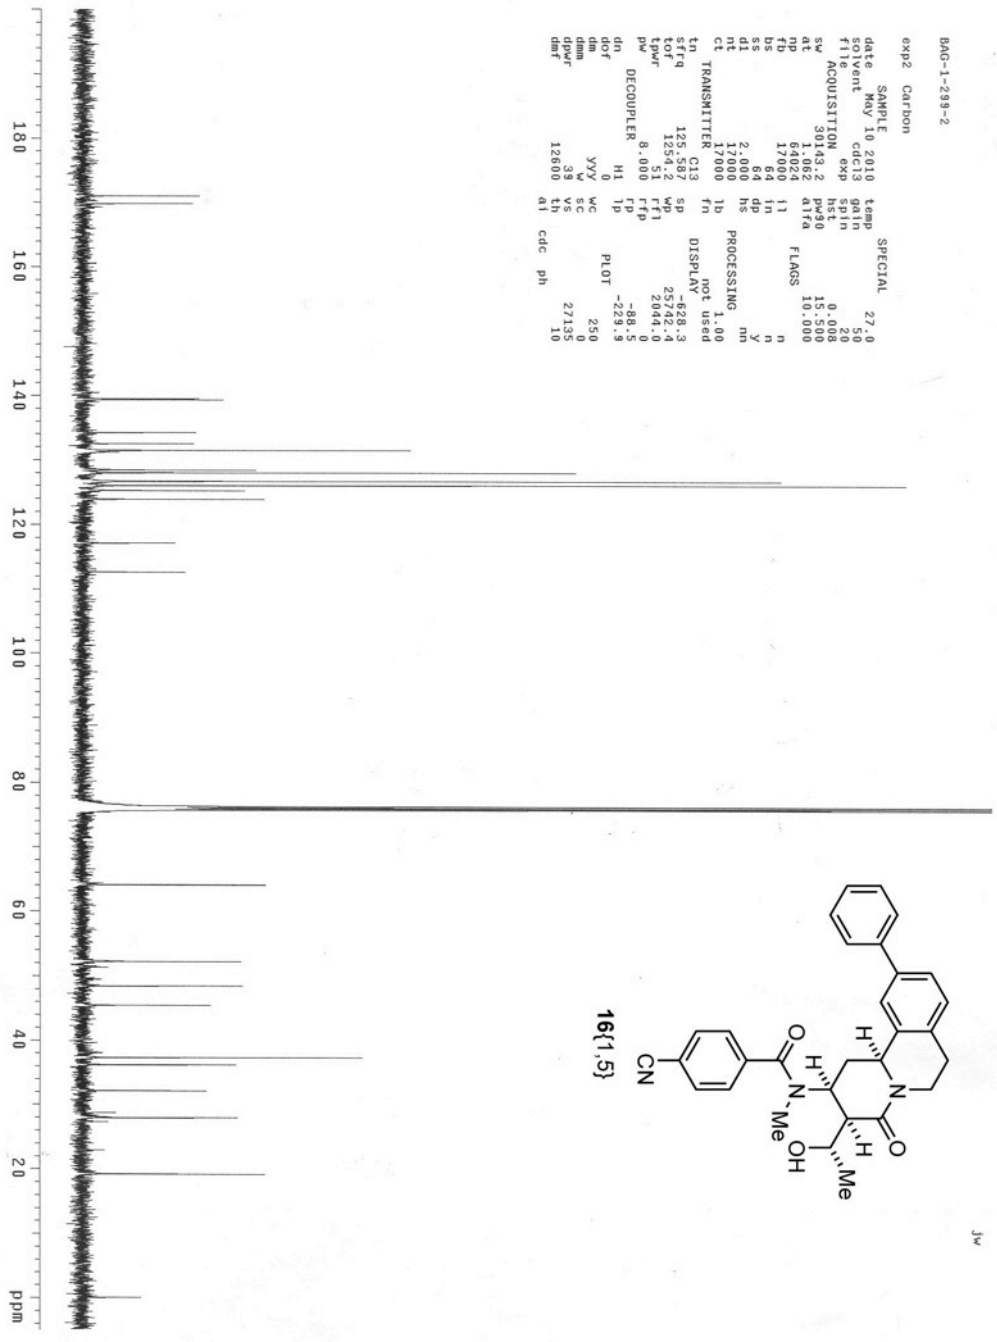

16{1.5}



Print of window 79: MS Spectrum  
Data File : L:\09-11\GRANGER\160911-SFM01491-13364.D  
Sample Name : SFM0149

=====  
Acq. Operator : bretttag35@mail.utexas.edu  
Acq. Instrument : LCMS Location : Vial 45  
Injection Date : 9/17/2011 12:17:43 AM Inj : 1  
Inj Volume : 1.0 µl  
Acq. Method : C:\CHEM32\1\METHODS\SP\_NIH.M  
Last changed : 9/17/2011 12:17:28 AM by bretttag35@mail.utexas.edu  
(modified after loading)  
Analysis Method : C:\CHEM32\1\METHODS\DEF\_LC.M  
Last changed : 11/20/2006 4:14:44 AM  
Sample Info : Easy-Access Method: 'SP\_NIH'

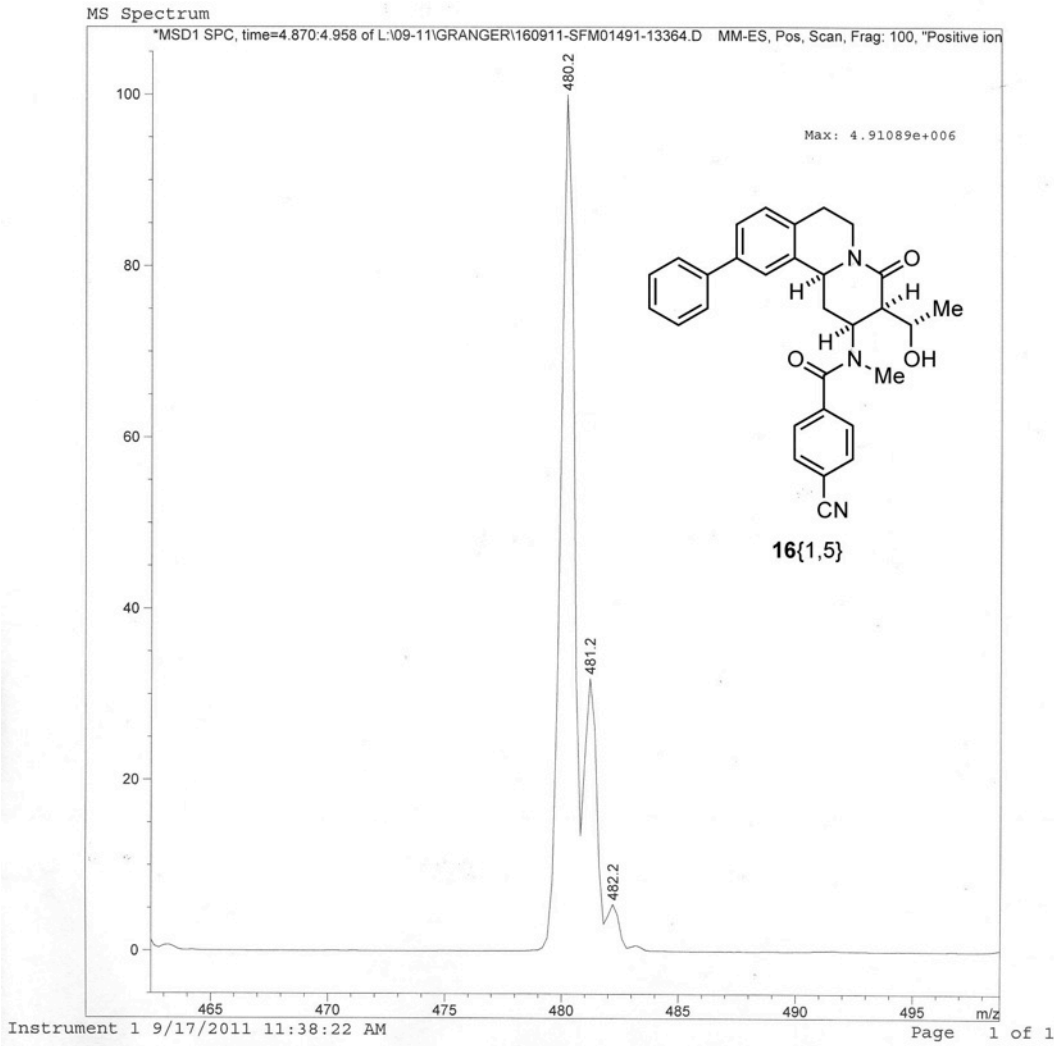

Archive directory:  
 Sample directory:  
 Pulse Sequence: s2pul1  
 Solvent: cdcl3  
 Ambient temperature  
 File: baq\_01\_249\_1\_s2pul1\_H1  
 INOVA-500 "hmf1roy"  
 Relax: delay 2.000 sec  
 Acq. time 4.000 sec  
 Width 6410.3 Hz  
 32 Repetitions 99.0047102 MHz  
 0524K PROCESSING  
 Line broadening 0.1 Hz  
 FI size 65536  
 Total time 3 min, 24 sec

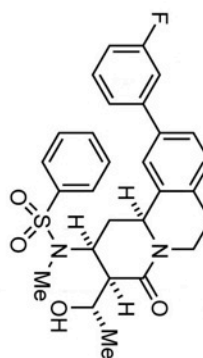

16{3,6}

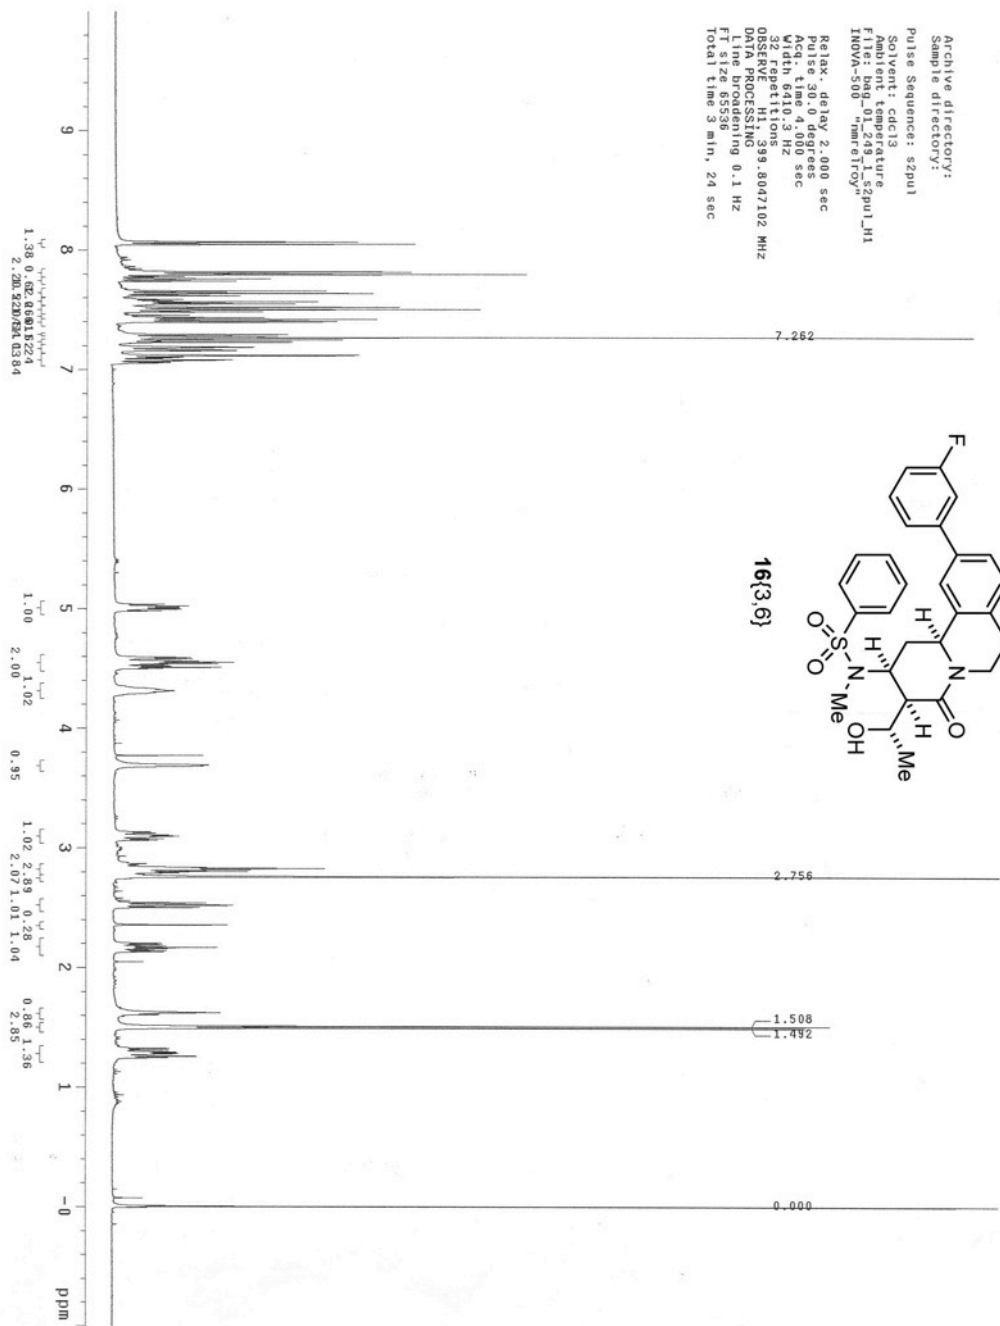

Archive directory:  
 Sample directory:  
 Pulse Sequence: s2pul1  
 Solvent: cdcl3  
 Subst: tcdcl3  
 User: 1-14-87  
 Filter: bhq\_01\_249\_1\_s2pul\_C13  
 INOVA-500 "nmrfroy"  
 Relax-delay: 2.000 sec  
 Pulse: 30 deg  
 Acq. time: 1.300 sec  
 Width: 24509.8 Hz  
 2000 repetitions: 5308324 MHz  
 DECOUPLE: C13, 399.8087105 MHz  
 Power: 44 db  
 continuously on  
 WALTZ16: modulated  
 DANTE: 2000  
 Line Broadening: 2.0 Hz  
 FT size: 65536  
 Total time: 1 hr., 50 min., 18 sec

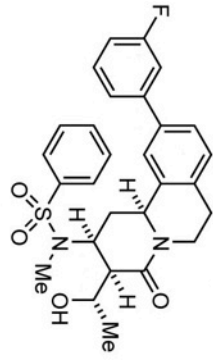

16(3.6)

77.349  
 77.029  
 76.717

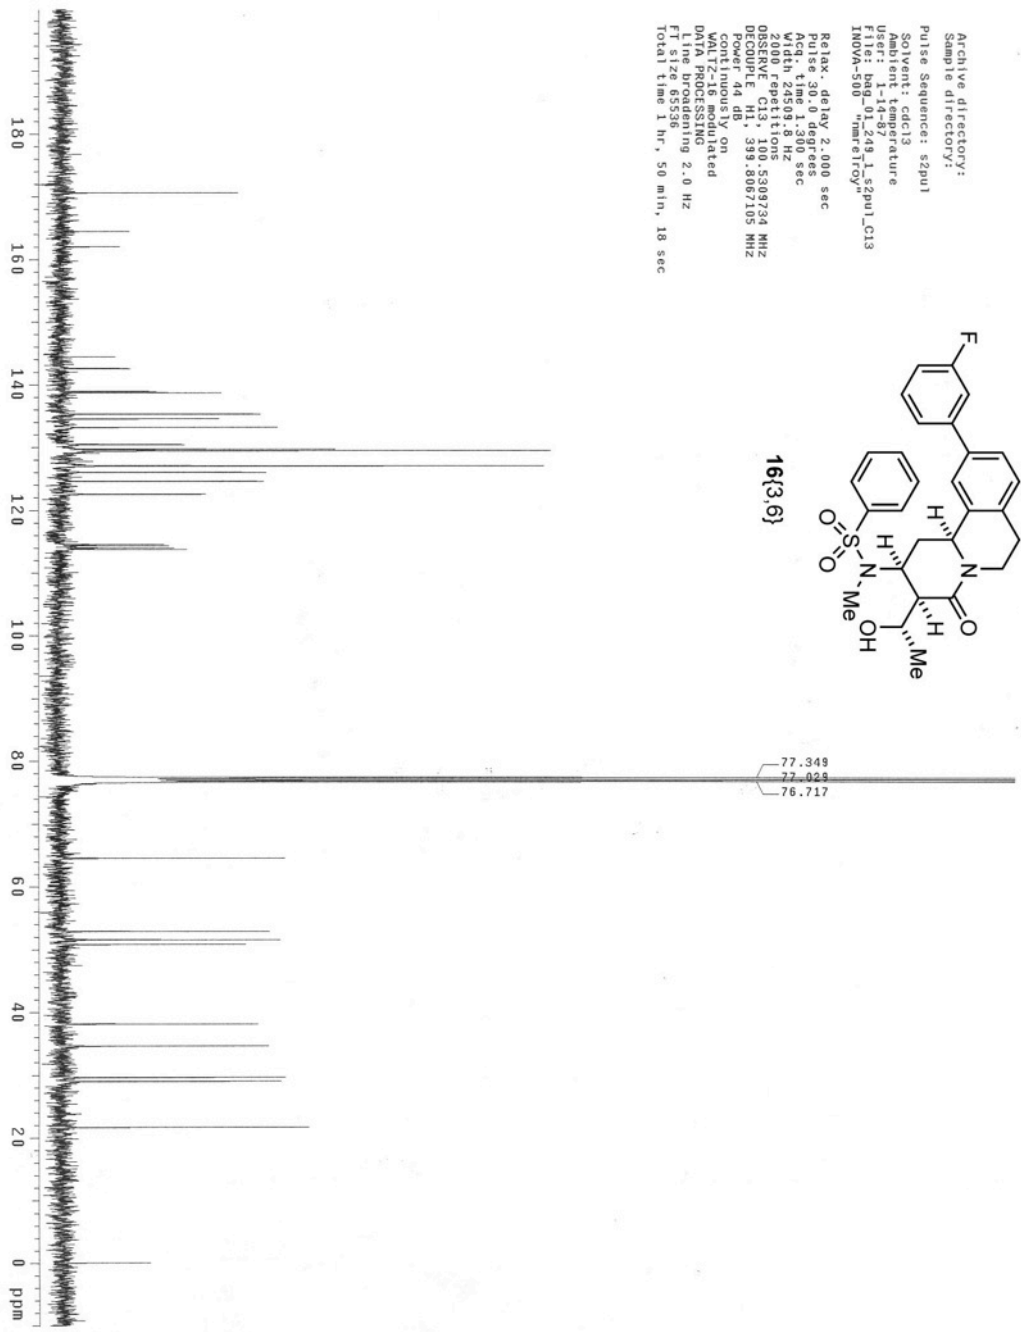

Data File L:\09-11\GRANGER\160911-SFM01471-13365.D  
Sample Name: SFM0147

=====  
Acq. Operator : bretttag35@mail.utexas.edu  
Acq. Instrument : LCMS Location : Vial 46  
Injection Date : 9/17/2011 12:32:43 AM Inj Volume : 1.0 µl  
Acq. Method : C:\CHEM32\1\METHODS\SP\_NIH.M  
Last changed : 9/17/2011 12:32:29 AM by bretttag35@mail.utexas.edu  
(modified after loading)  
Analysis Method : C:\CHEM32\1\METHODS\DEF\_LC.M  
Last changed : 11/20/2006 4:14:44 AM  
Sample Info : Easy-Access Method: 'SP\_NIH'

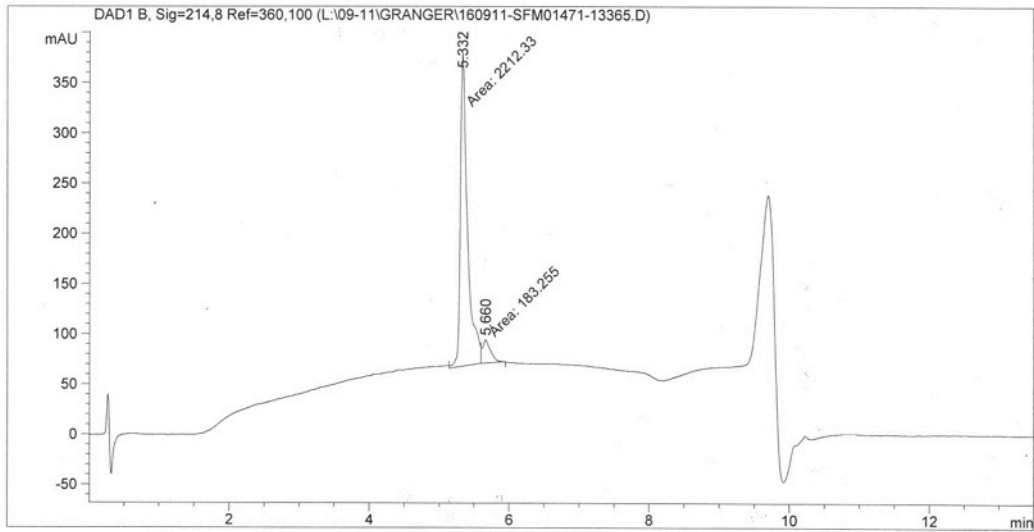

=====  
Area Percent Report  
=====

Sorted By : Signal  
Multiplier: : 1.0000  
Dilution: : 1.0000  
Use Multiplier & Dilution Factor with ISTDs

Signal 1: DAD1 B, Sig=214,8 Ref=360,100

| Peak # | RetTime [min] | Type | Width [min] | Area [mAU*s] | Height [mAU] | Area %  |
|--------|---------------|------|-------------|--------------|--------------|---------|
| 1      | 5.332         | MM   | 0.1180      | 2212.32764   | 312.42572    | 92.3503 |
| 2      | 5.660         | MM   | 0.1316      | 183.25522    | 23.20903     | 7.6497  |

Totals : 2395.58286 335.63475

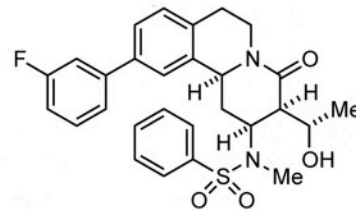

16{3,6}

Print of window 79: MS Spectrum  
Data File : L:\09-11\GRANGER\160911-SFM01471-13365.D  
Sample Name : SFM0147

=====  
Acq. Operator : bretttag35@mail.utexas.edu  
Acq. Instrument : LCMS Location : Vial 46  
Injection Date : 9/17/2011 12:32:43 AM Inj : 1  
Inj Volume : 1.0 µl  
Acq. Method : C:\CHEM32\1\METHODS\SP\_NIH.M  
Last changed : 9/17/2011 12:32:29 AM by bretttag35@mail.utexas.edu  
(modified after loading)  
Analysis Method : C:\CHEM32\1\METHODS\DEF\_LC.M  
Last changed : 11/20/2006 4:14:44 AM  
Sample Info : Easy-Access Method: 'SP\_NIH'

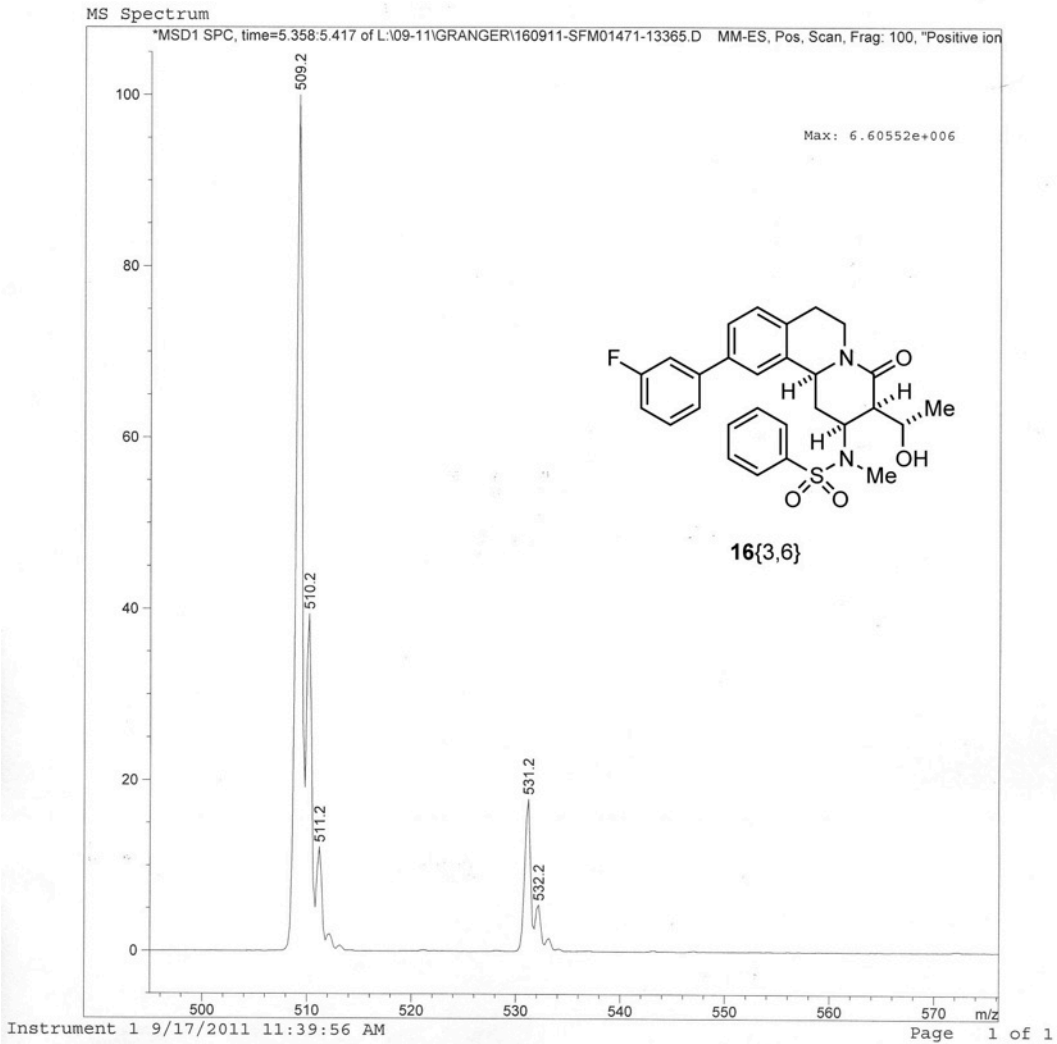





BAG-2-47-6

exp4 Carbon

SAMPLE SPECIAL 27.0  
date Feb 22 2010 temp 50  
solvent cdc13 gain 50  
file exp h550 spin 20  
ACQUISITION exp h550 0.008  
sw 301.43.2 h550 10.000  
at 1.062 at1a 10.000  
np 64024 17000 11 n  
fb 17000 11 n  
bs 124 dn n  
d1 2.000 hs n  
nt 4000 4000 1b PROCESSING nm  
ct 4000 4000 1b 1.00  
tn TRANSMITTER C13 1b not used  
sfrq 125.587 sp DISPLAY -628.1  
tor 1254.2 mp 25742.4  
lpuv 5.1 f1 11587.0  
pw 8.000 f2 3880.48  
DECOUPLER H1 1p PLOT -220.3  
dn 0 mc 250  
dof 0 yy sc 7743  
dm 39 vs 68  
nm 12800 at cdc ph

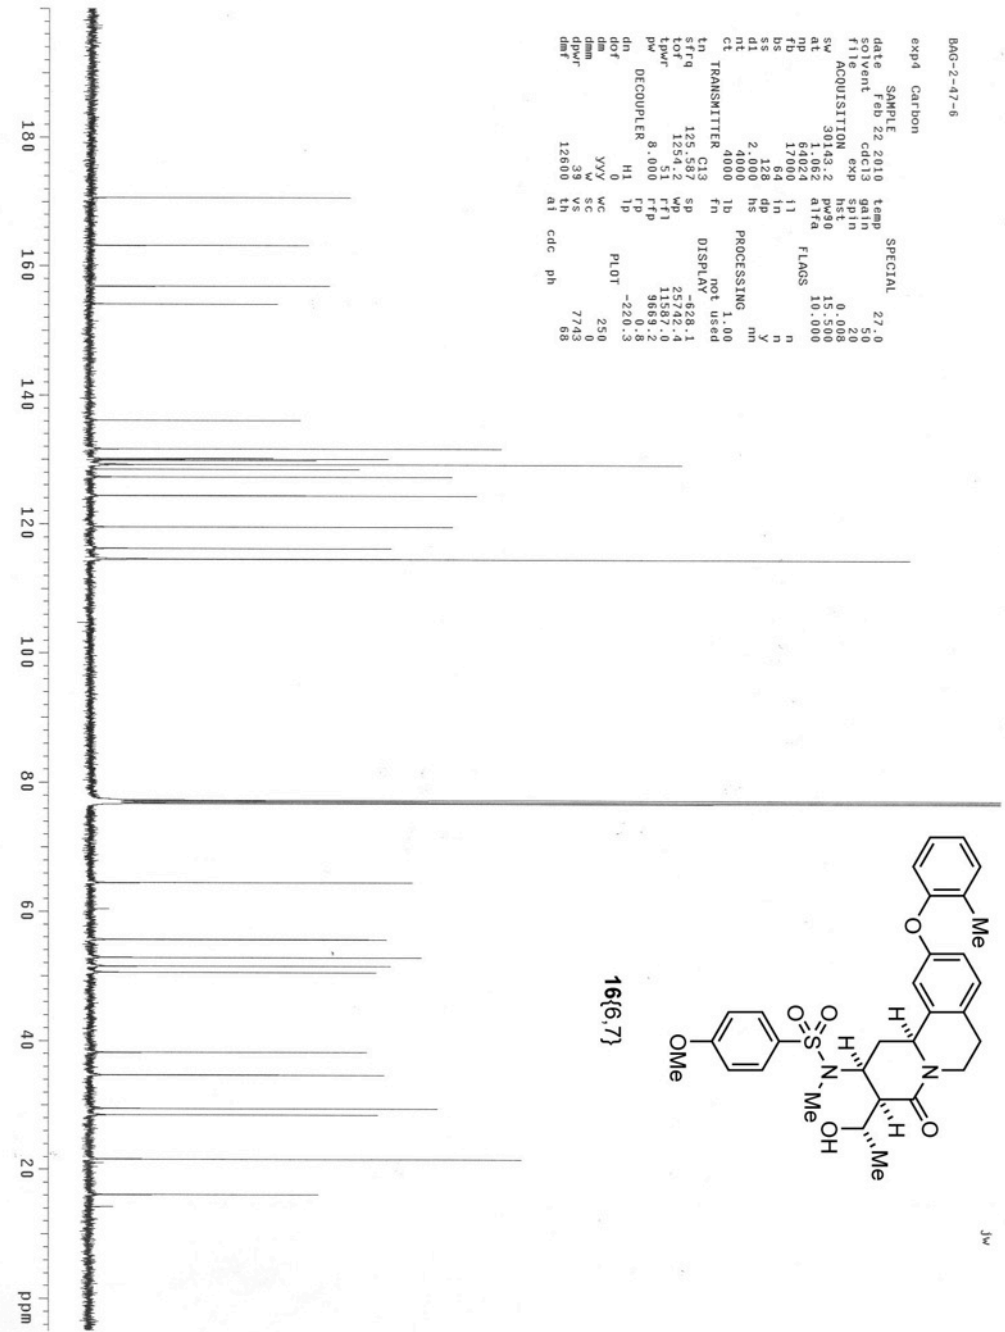

Data File Z:\02-10\GRANGER\260210-BAG-2-47-61-01625.D  
Sample Name: BAG-2-47-6

=====  
Acq. Operator : bretttag35@mail.utexas.edu  
Acq. Instrument : LCMS Location : Vial 55  
Injection Date : 2/26/2010 9:09:26 PM Inj Volume : 1.0 µl  
Acq. Method : C:\CHEM32\1\METHODS\SP\_NIH.M  
Last changed : 2/26/2010 9:09:15 PM by bretttag35@mail.utexas.edu  
(modified after loading)  
Analysis Method : C:\CHEM32\1\METHODS\DEF\_LC.M  
Last changed : 2/25/2010 3:55:13 PM  
(modified after loading)  
Sample Info : Easy-Access Method: 'SP\_NIH'

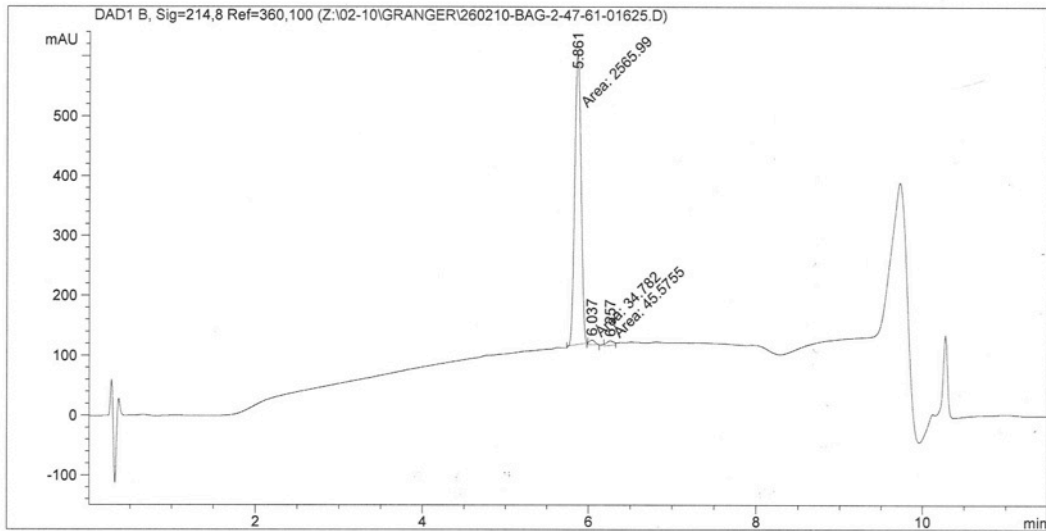

=====  
Area Percent Report  
=====

Sorted By : Signal  
Multiplier: : 1.0000  
Dilution: : 1.0000  
Use Multiplier & Dilution Factor with ISTDs

Signal 1: DAD1 B, Sig=214,8 Ref=360,100

| Peak # | RetTime [min] | Type | Width [min] | Area [mAU*s] | Height [mAU] | Area %  |
|--------|---------------|------|-------------|--------------|--------------|---------|
| 1      | 5.861         | MM   | 0.0875      | 2565.99365   | 488.58817    | 96.9635 |
| 2      | 6.037         | MM   | 0.0752      | 34.78198     | 7.71055      | 1.3143  |
| 3      | 6.257         | MM   | 0.1006      | 45.57550     | 7.54726      | 1.7222  |

Totals : 2646.35113 503.84597

Instrument 1 2/27/2010 10:25:55 AM

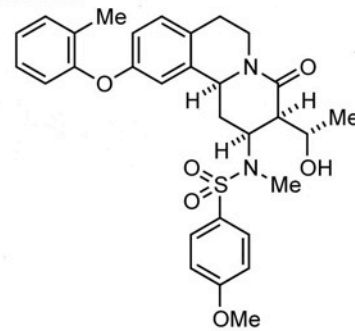

16{6,7}

Page 1 of 2

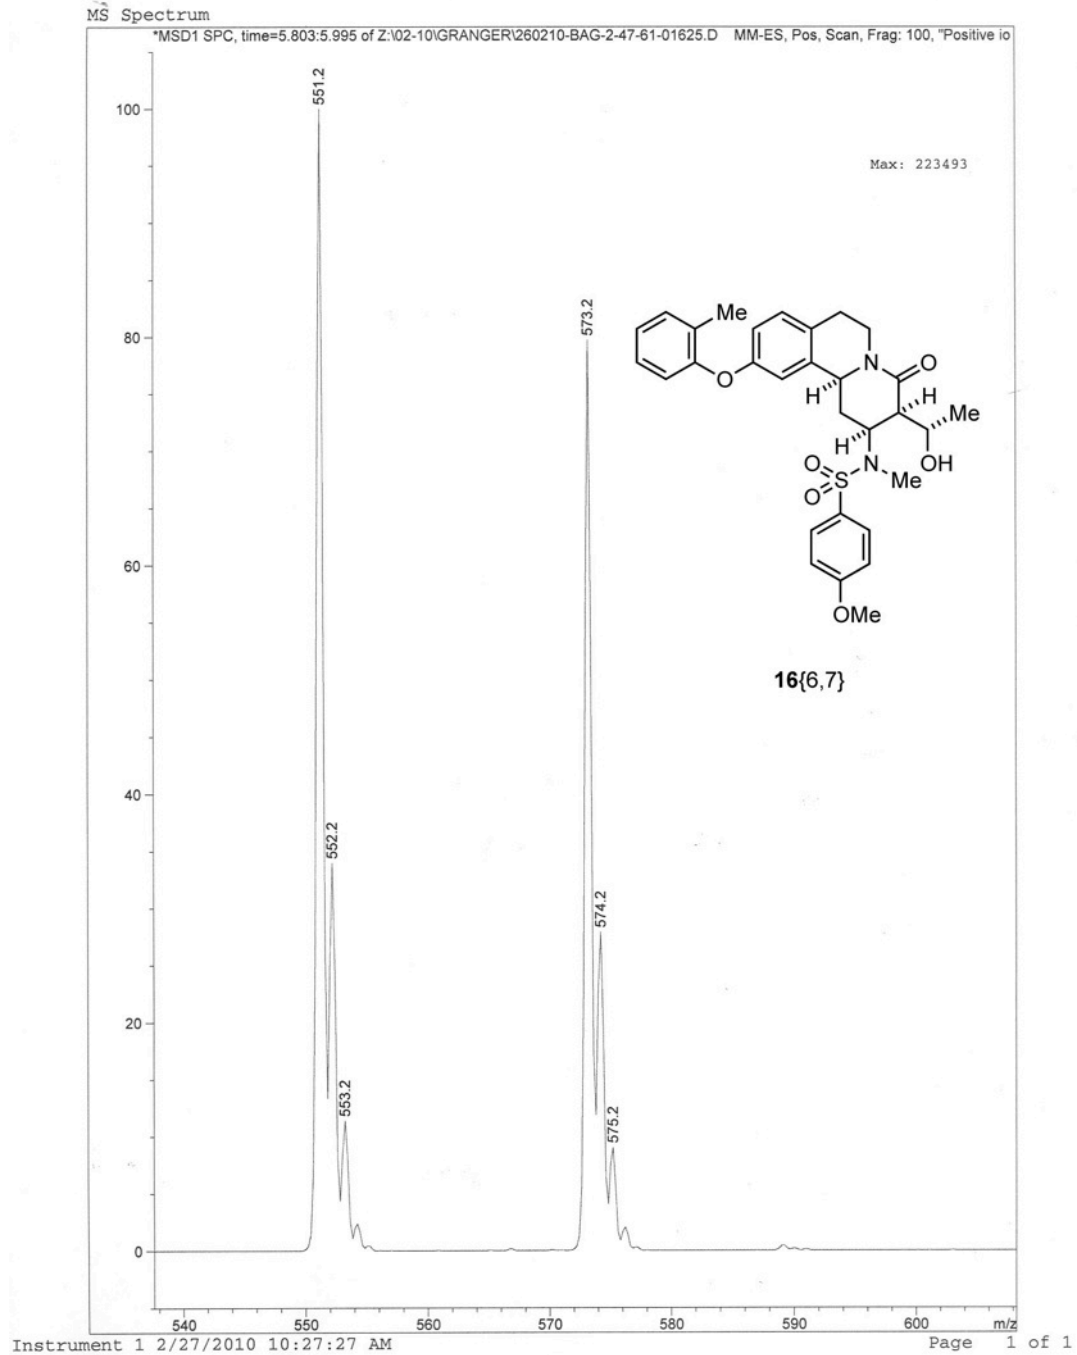



BAG-1-301-2

exp4 Carbon  
SAMPLE  
date Jan 28 2010 temp 27.0  
solvent cdcl3 gain 50  
file ACQUISITION exp h5 20  
sw 30143.2 h5 15.006  
at 1.062 atfa 10.000  
nt 17000 11 n  
fb 64024 11 n  
s1 128 dn n  
s2 2.000 hs n  
nt 16000 hs nm  
ct TRANSMITTER 858 j0 PROCESSING 1.00  
tn C13 fm pot used  
stfq 125.587 sp -628.3  
tof 1254.2 mp 25742.4  
tprf 8.000 ffa 1914.3  
pw 8.000 ffp -7.3  
DECOUPLER H1 1p PLOT -215.2  
ddr 0 yyy mc 250  
ddm yyy sc 11575  
dpuw 39 vs 68  
dnt 12600 th a1 cdc ph

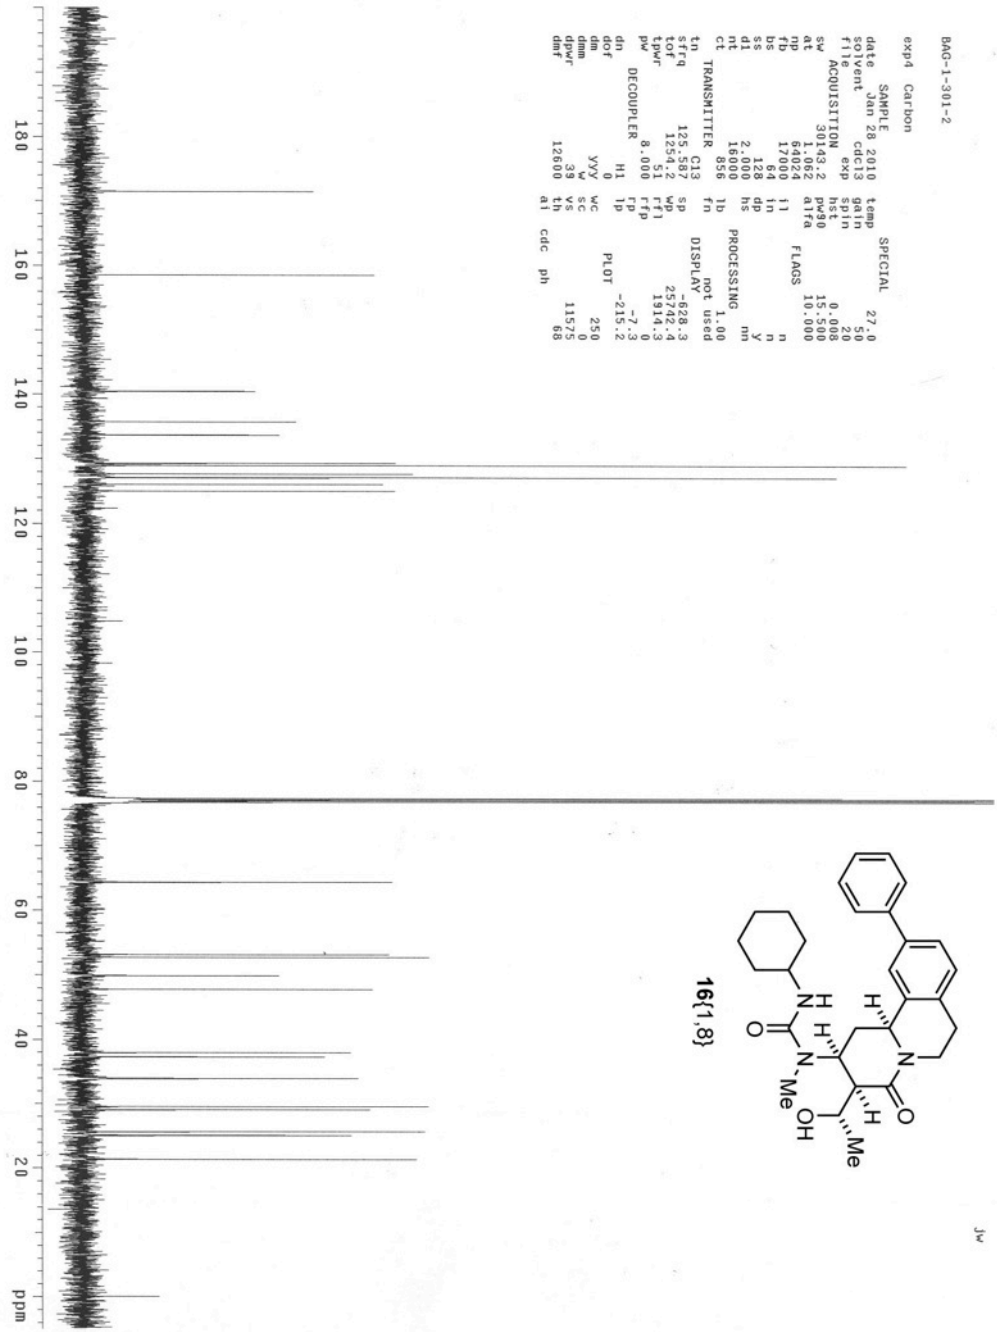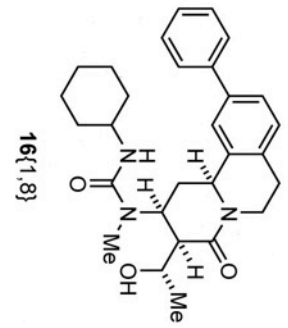

Data File L:\09-11\GRANGER\160911-SFM01501-13366.D  
 Sample Name: SFM0150

```

=====
Acq. Operator   : bretttag35@mail.utexas.edu
Acq. Instrument : LCMS                               Location : Vial 47
Injection Date  : 9/17/2011 12:47:43 AM
Inj Volume     : 1.0 µl

Acq. Method    : C:\CHEM32\1\METHODS\SP_NIH.M
Last changed   : 9/17/2011 12:47:28 AM by bretttag35@mail.utexas.edu
                (modified after loading)
Analysis Method: C:\CHEM32\1\METHODS\DEF_LC.M
Last changed   : 11/20/2006 4:14:44 AM
Sample Info    : Easy-Access Method: 'SP_NIH'
  
```

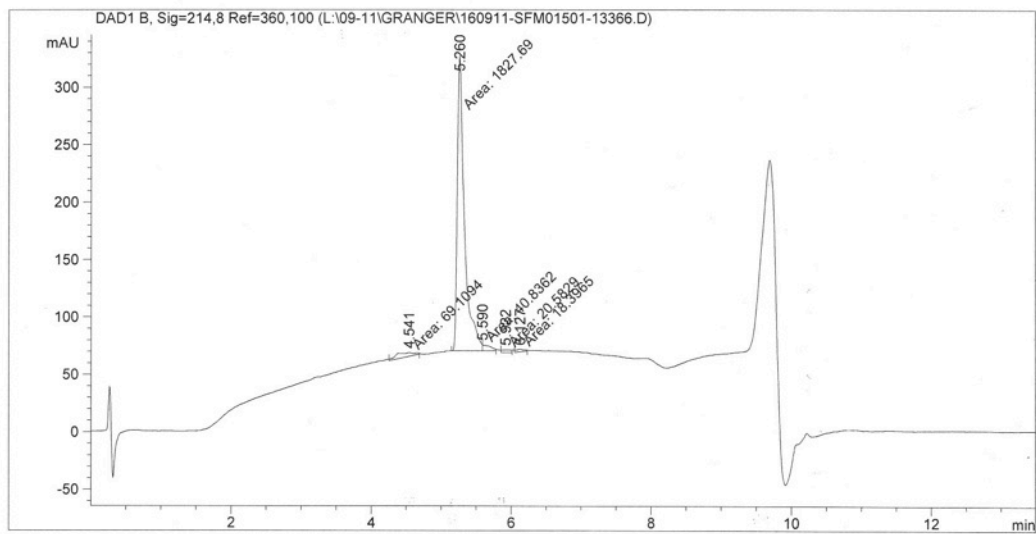

=====  
 Area Percent Report  
 =====

```

Sorted By      :      Signal
Multiplier:    :      1.0000
Dilution:      :      1.0000
Use Multiplier & Dilution Factor with ISTDs
  
```

Signal 1: DAD1 B, Sig=214,8 Ref=360,100

| Peak # | RetTime [min] | Type | Width [min] | Area [mAU*s] | Height [mAU] | Area %  |
|--------|---------------|------|-------------|--------------|--------------|---------|
| 1      | 4.541         | MM   | 0.3433      | 69.10943     | 3.35512      | 3.4964  |
| 2      | 5.260         | MM   | 0.1184      | 1827.68750   | 257.19733    | 92.4656 |
| 3      | 5.590         | MM   | 0.0993      | 40.83616     | 5.43133      | 2.0660  |
| 4      | 5.922         | MM   | 0.1474      | 20.58289     | 2.32797      | 1.0413  |
| 5      | 6.127         | MM   | 0.1284      | 18.39647     | 2.38740      | 0.9307  |

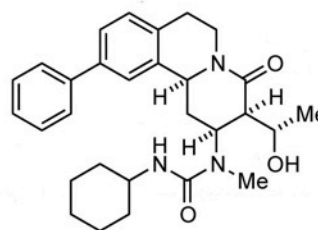

16{1,8}

Print of window 79: MS Spectrum  
Data File : L:\09-11\GRANGER\160911-SFM01501-13366.D  
Sample Name : SFM0150

=====  
Acq. Operator : bretttag35@mail.utexas.edu  
Acq. Instrument : LCMS Location : Vial 47  
Injection Date : 9/17/2011 12:47:43 AM Inj : 1  
Inj Volume : 1.0 µl  
  
Acq. Method : C:\CHEM32\1\METHODS\SP\_NIH.M  
Last changed : 9/17/2011 12:47:28 AM by bretttag35@mail.utexas.edu  
(modified after loading)  
Analysis Method : C:\CHEM32\1\METHODS\DEF\_LC.M  
Last changed : 11/20/2006 4:14:44 AM  
Sample Info : Easy-Access Method: 'SP\_NIH'

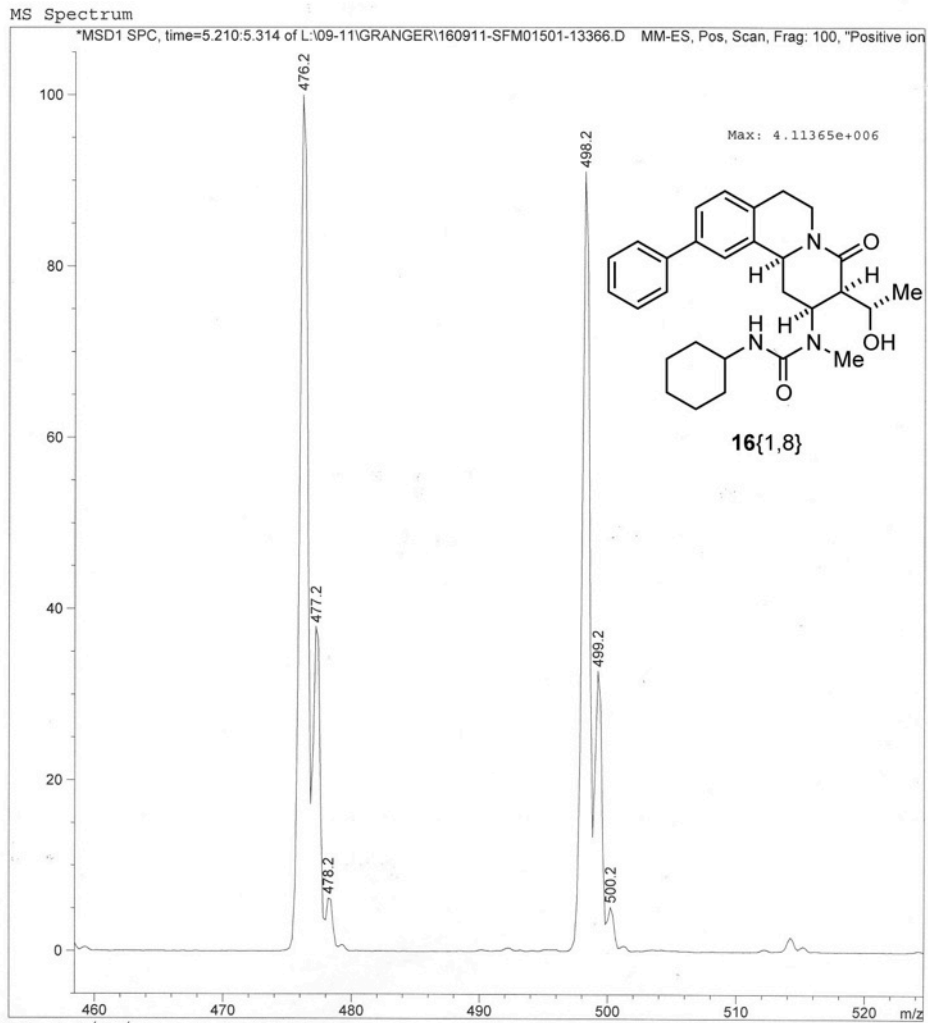





600 MHz nmrOx  
BA0-01-266-2

exp4 Carbon

|             |         |             |      |         |          |
|-------------|---------|-------------|------|---------|----------|
| SAMPLE      | date    | Aug 28 2009 | temp | 27.0    | SPECIAL  |
| solvent     | cdc13   |             | gain | 4.0     |          |
| file        | exp     |             | spin | 20      |          |
| ACQUISITION | exp     |             | hst  | 0.008   |          |
| sw          | 4092.60 |             | pw20 | 10.000  |          |
| at          | 161290  |             | fl18 | 10.000  |          |
| np          | 17000   |             | 11   | n       |          |
| fb          | 17000   |             | 11   | n       |          |
| bs          | 2.08    |             | dn   | n       |          |
| nl          | 20000   |             | hs   | n       |          |
| ct          | 20000   |             | hs   | n       |          |
| TRANSMITTER | G13     |             | lb   | 0.50    |          |
| fn          | 150.823 |             | fn   | DISPLA  | not used |
| sf19        | 2296.3  |             | sp   | -754.3  |          |
| tpwr        | 58      |             | wp   | 30915.4 |          |
| pw          | 2.600   |             | fft1 | 3565.5  |          |
| DECOUPLER   | H1      |             | ftp  | 47.5    |          |
| dn          | 0       |             | tp   | -18.4   |          |
| dotf        | 0       |             |      |         |          |
| dm          | yyy     |             | PLOT |         |          |
| dmms        | w       |             | mc   | 250     |          |
| dmpr        | 4       |             | vs   | 173630  |          |
| dmf         | 15337   |             | th   | 173630  |          |
| at          | cdc     |             | ph   | 68      |          |

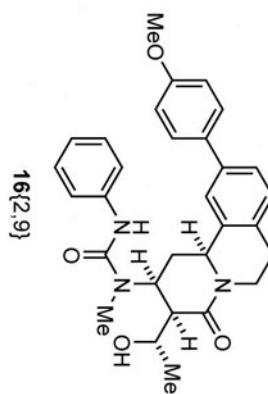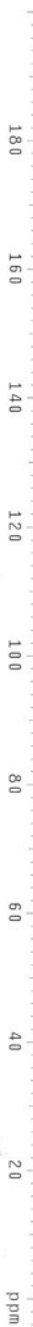

Data File L:\09-11\GRANGER\160911-SFM00471-13367.D  
 Sample Name: SFM0047

```

=====
Acq. Operator   : bretttag35@mail.utexas.edu
Acq. Instrument : LCMS                               Location : Vial 48
Injection Date  : 9/17/2011 1:02:48 AM
Inj Volume     : 1.0 µl

Acq. Method    : C:\CHEM32\1\METHODS\SP_NIH.M
Last changed   : 9/17/2011 1:02:33 AM by bretttag35@mail.utexas.edu
                (modified after loading)
Analysis Method: C:\CHEM32\1\METHODS\DEF_LC.M
Last changed   : 11/20/2006 4:14:44 AM
Sample Info    : Easy-Access Method: 'SP_NIH'
  
```

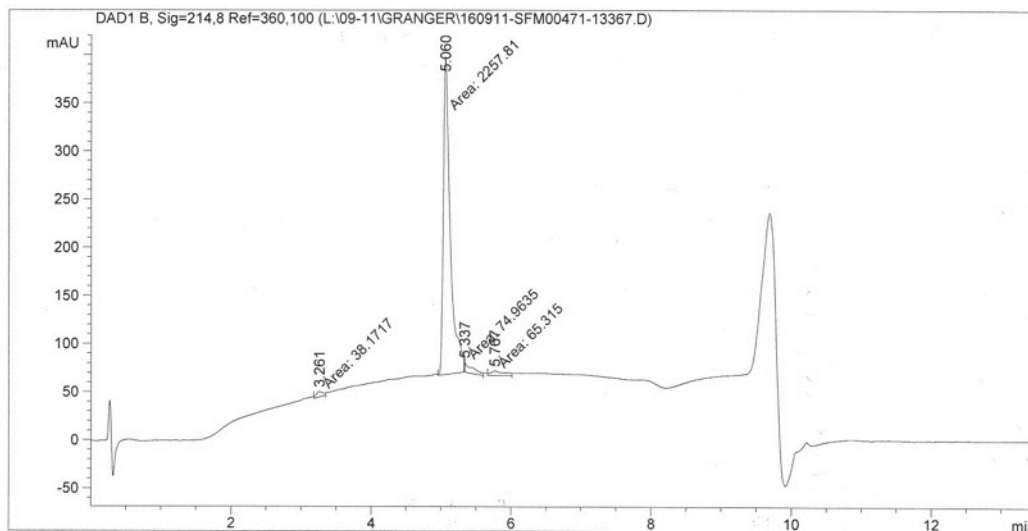

=====  
 Area Percent Report  
 =====

```

Sorted By      :      Signal
Multiplier:    :      1.0000
Dilution:      :      1.0000
Use Multiplier & Dilution Factor with ISTDs
  
```

Signal 1: DAD1 B, Sig=214,8 Ref=360,100

| Peak # | RetTime [min] | Type | Width [min] | Area [mAU*s] | Height [mAU] | Area %  |
|--------|---------------|------|-------------|--------------|--------------|---------|
| 1      | 3.261         | MM   | 0.1077      | 38.17173     | 5.90643      | 1.5668  |
| 2      | 5.060         | MM   | 0.1138      | 2257.80518   | 330.67264    | 92.6752 |
| 3      | 5.337         | MM   | 0.1083      | 74.96353     | 10.07144     | 3.0770  |
| 4      | 5.767         | MM   | 0.2310      | 65.31505     | 4.71266      | 2.6810  |

Totals :                                    2436.25548    351.36318

Instrument 1 9/17/2011 11:43:41 AM

Page 1 of 2

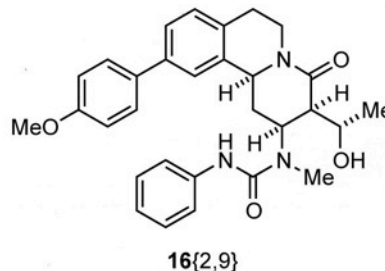

Print of window 79: MS Spectrum  
Data File : L:\09-11\GRANGER\160911-SFM00471-13367.D  
Sample Name : SFM0047

=====  
Acq. Operator : bretttag35@mail.utexas.edu  
Acq. Instrument : LCMS Location : Vial 48  
Injection Date : 9/17/2011 1:02:48 AM Inj : 1  
Inj Volume : 1.0 µl  
Acq. Method : C:\CHEM32\1\METHODS\SP\_NIH.M  
Last changed : 9/17/2011 1:02:33 AM by bretttag35@mail.utexas.edu  
(modified after loading)  
Analysis Method : C:\CHEM32\1\METHODS\DEF\_LC.M  
Last changed : 11/20/2006 4:14:44 AM  
Sample Info : Easy-Access Method: 'SP\_NIH'

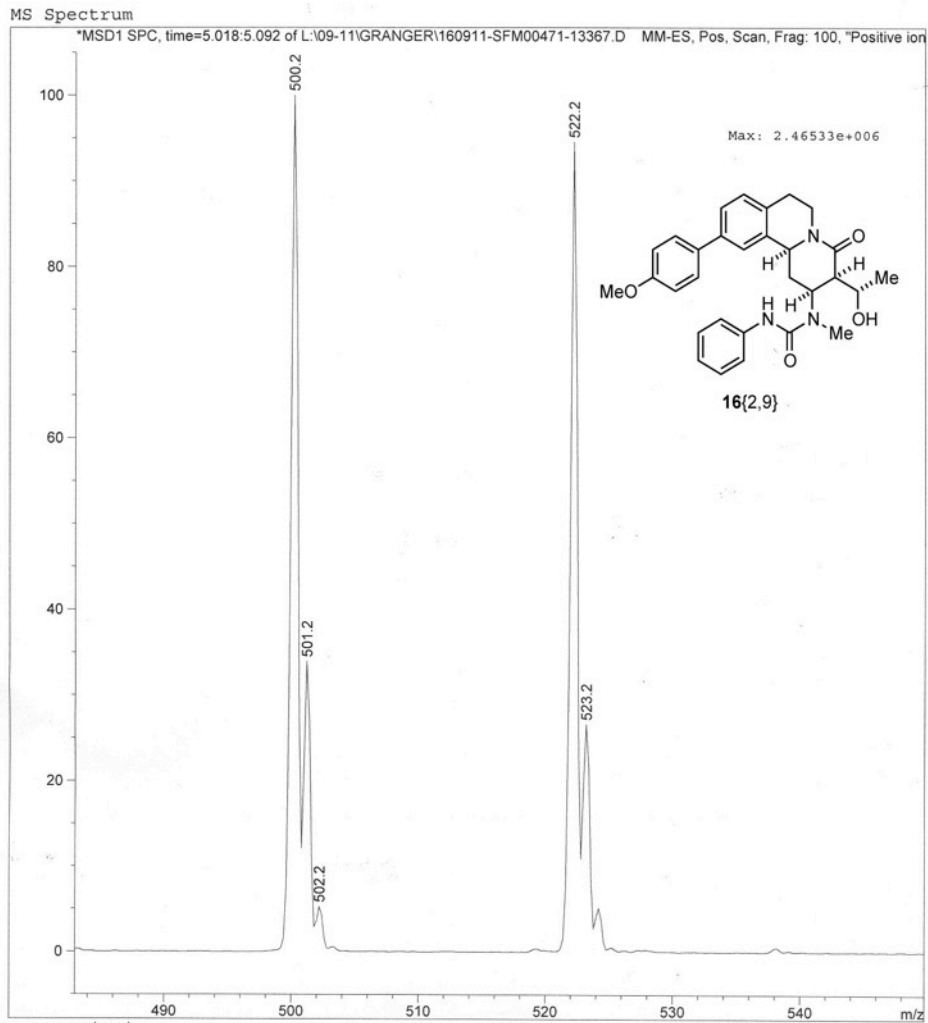

500 MHz nmr0

BAG-1-301-1

expt Proton

| PARAMETER | VALUE   | UNIT | COMMENT    |
|-----------|---------|------|------------|
| date      | 27      | 0    | SPECIAL    |
| file      | cdcl3   | gain | 30         |
| solvent   | exp     | hst  | 20         |
| acq       | 797.6   | ppm  | 0.008      |
| sw        | 4000    | Hz   | 11.800     |
| np        | 64000   | pts  | 8.900      |
| fb        | 4000    | Hz   | n          |
| bs        | 32      | in   | n          |
| ds        | 2.000   | Hz   | n          |
| nt        | 64      | tb   | PROCESSING |
| ct        | 64      | tb   | 0.10       |
| td        | H1      | fn   | 262144     |
| tr        | H1      | sp   | DISP       |
| sfreq     | 499.868 | MHz  | -250.0     |
| tof       | 499.8   | MHz  | 5248.5     |
| tpwr      | 57      | FT1  | 999.8      |
| pw        | 1.833   | FT1  | 258.0      |
| dn        | DEC     | FT1  | -1.1       |
| dof       | 0       | PL0T | 250        |
| dm        | 0       | WC   | 508        |
| dm        | 40      | VC   | 508        |
| dpr       | 14285   | th   | 12         |
| dpr       |         | at   | cdc        |
| dpr       |         | ph   |            |

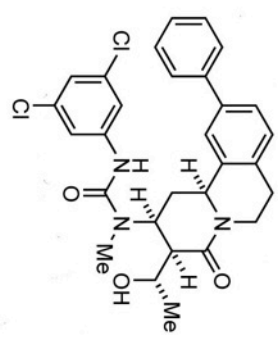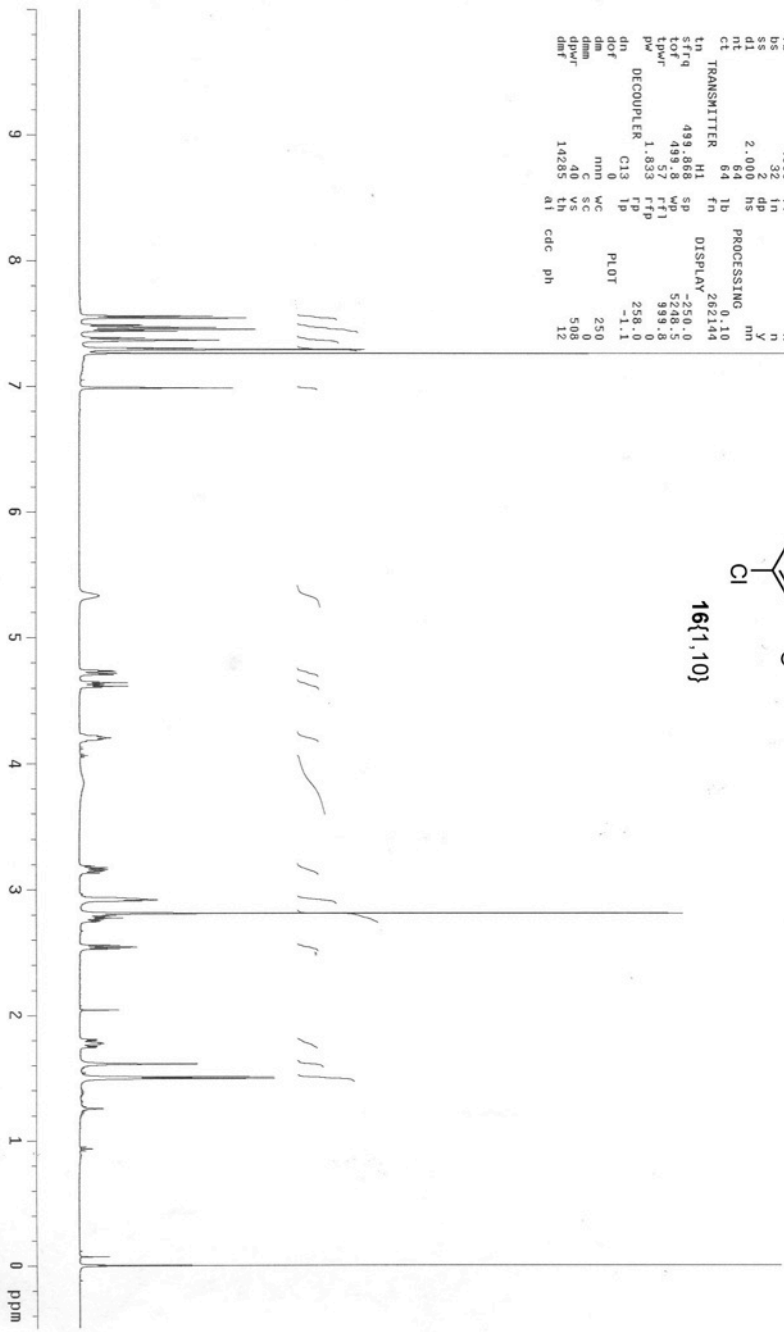

500 MHz nmr0  
 BAG-1-301-1  
 expd Carbon

|         |             |      |      |       |         |        |
|---------|-------------|------|------|-------|---------|--------|
| date    | SAMPLE      | 27   | 2010 | temp  | SPECIAL | 27.0   |
| solvent | cdcl3       | exp  | gain | spn   |         | 40     |
| file    | ACQUISITION | exp  | hst  | hst   |         | 0.008  |
| sv      | 3278.7      | ppm  |      |       |         | 0.000  |
| at      | 3278.52     | attn |      | FLAGS |         | 10.000 |
| np      | 128000      | ft   |      |       |         | n      |
| fb      | 18000       | ft   |      |       |         | n      |
| bs      | 2.16        | tp   |      |       |         | y      |
| st      | 5000        | hp   |      |       |         | m      |
| ct      | 5000        | hb   |      |       |         | m      |

|      |             |     |      |          |
|------|-------------|-----|------|----------|
| tr   | TRANSMITTER | q13 | fn   | NOT used |
| sf   | 125.703     | sp  | DISP | -628.8   |
| lof  | 1863.9      | wp  |      | 25766.4  |
| tpwr | 53          | fft |      | 2540.6   |
| pw   | 3.163       | ftf |      | -21.2    |
| dn   | DECOUPLER   | H1  | PLDT | -216.9   |
| dof  | 0           | lp  |      |          |
| dca  | YYY         | mc  |      | 250      |
| dmm  | 3           | vc  |      | 33212    |
| dmr  | 3           | th  | cdc  | ph       |
| dnt  | 10582       | at  |      | 10       |

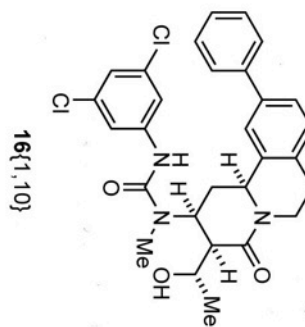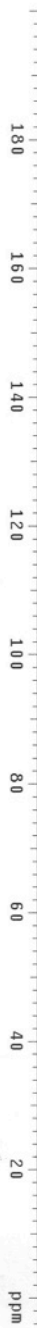

Data File Z:\01-10\GRANGER\140110-BAG-01-301-11-00175.D  
Sample Name: BAG-01-301-1

=====  
Acq. Operator : bretttag35@gmail.com  
Acq. Instrument : LCMS Location : Vial 18  
Injection Date : 1/14/2010 2:52:54 PM Inj Volume : 1.0 µl  
Acq. Method : C:\CHEM32\1\METHODS\SP\_NIH.M  
Last changed : 1/14/2010 2:52:43 PM by bretttag35@gmail.com  
(modified after loading)  
Analysis Method : C:\CHEM32\1\METHODS\DEF\_LC.M  
Last changed : 11/20/2006 4:14:44 AM  
Sample Info : Easy-Access Method: 'SP\_NIH'

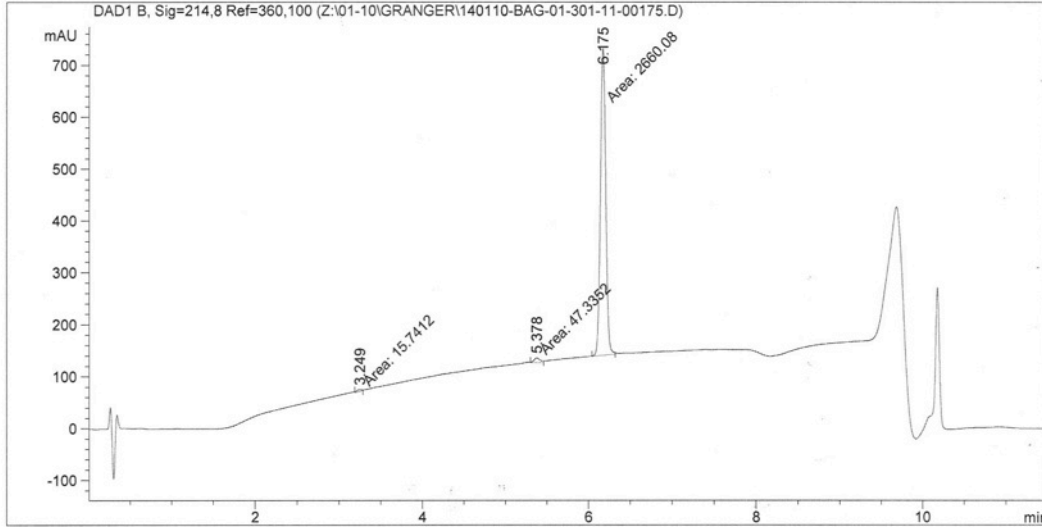

=====  
Area Percent Report  
=====

Sorted By : Signal  
Multiplier: : 1.0000  
Dilution: : 1.0000  
Use Multiplier & Dilution Factor with ISTDs

Signal 1: DAD1 B, Sig=214,8 Ref=360,100

| Peak # | RetTime [min] | Type | Width [min] | Area [mAU*s] | Height [mAU] | Area %  |
|--------|---------------|------|-------------|--------------|--------------|---------|
| 1      | 3.249         | MM   | 0.0656      | 15.74118     | 4.00183      | 0.5780  |
| 2      | 5.378         | MM   | 0.0882      | 47.33524     | 8.94904      | 1.7382  |
| 3      | 6.175         | MM   | 0.0745      | 2660.08301   | 594.81671    | 97.6837 |

Totals : 2723.15943 607.76759

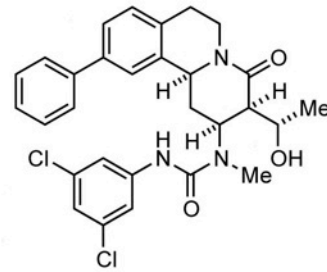

16{1,10}

MS Spectrum

MSD1 SPC, time=6.247 of Z:\01-10\GRANGER\140110-BAG-01-301-11-00175.D MM-ES, Pos, Scan, Frag: 100, "Positive ions"

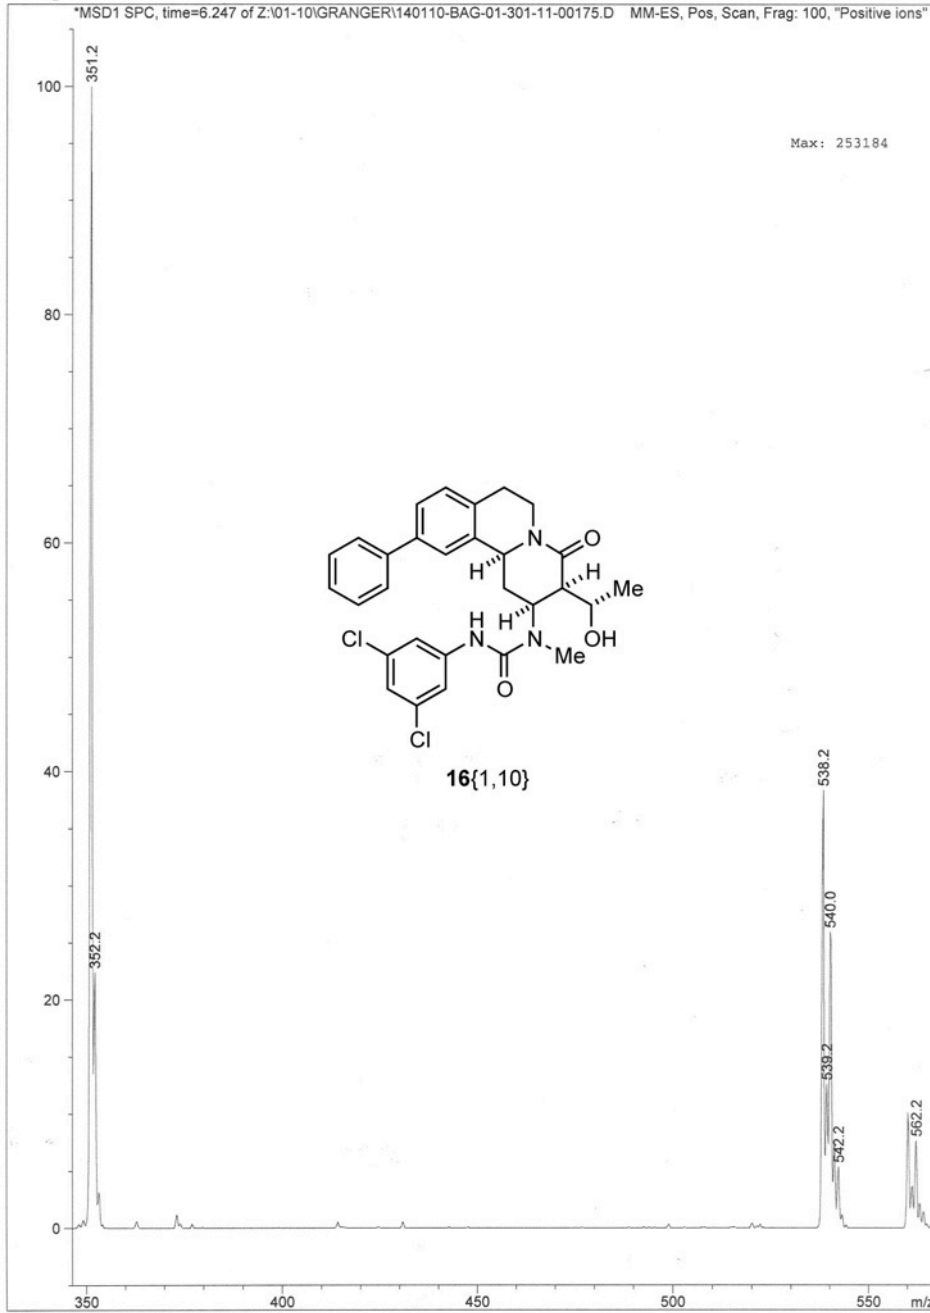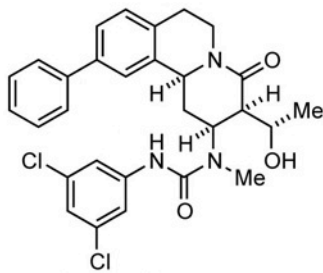

16{1,10}





600 MHz narox

BAG-2-54-1

exptl Carbon

```
SAMPLE 1 2010 temp 27.0
date Mar gain 30
solvent cdcl3 hst 0.008
ft1 exp hst 7.800
ACQUISITION pw90 10.000
sw 40322.6 atfla 10.000
at 2.000 11
mp 1.7000 11
bs 64 in n
d1 2.000 dp n
nt 8000 hs PROCESSING nn
ct TRANSMITTER 1b fn not used
tn C13 150.824 sp DISPLAY 254.3
sffq 2296.33 f1 30815.2
dpr 2.600 f1f1 3566.4
pw DECOUPLER H1 f1f1 0
dn H1 TP 210.9
dot 0 yy 20.1
ddp 0 wc PLOT 250
dmm 46 sc 110187
dpr 15337 vn 88
dat al cdc ph
```

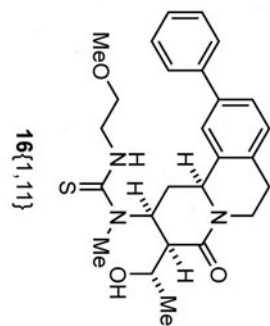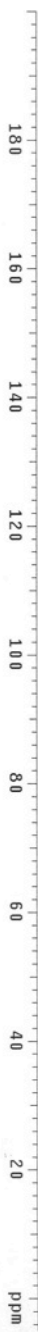

Data File Z:\02-10\GRANGER\260210-BAG-2-54-11-01627.D  
 Sample Name: BAG-2-54-1

```

=====
Acq. Operator   : bretttag35@mail.utexas.edu
Acq. Instrument : LCMS                               Location : Vial 57
Injection Date  : 2/26/2010 9:35:17 PM
                                                    Inj Volume : 1.0 µl

Acq. Method    : C:\CHEM32\1\METHODS\SP_NIH.M
Last changed   : 2/26/2010 9:35:06 PM by bretttag35@mail.utexas.edu
                (modified after loading)
Analysis Method: C:\CHEM32\1\METHODS\DEF_LC.M
Last changed   : 2/25/2010 3:55:13 PM
                (modified after loading)
Sample Info    : Easy-Access Method: 'SP_NIH'
=====
  
```

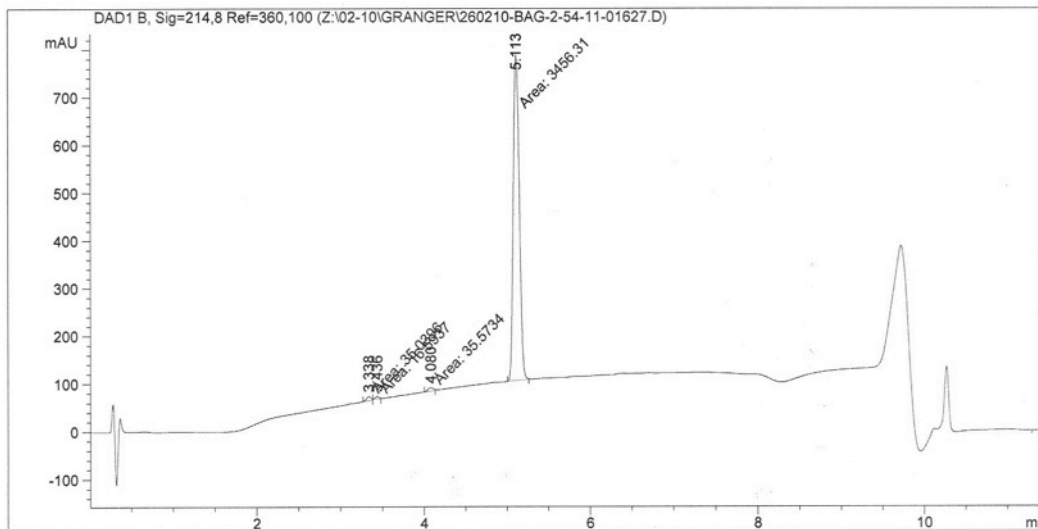

=====  
 Area Percent Report  
 =====

```

Sorted By      :      Signal
Multiplier:    :      1.0000
Dilution:      :      1.0000
Use Multiplier & Dilution Factor with ISTDs
  
```

Signal 1: DAD1 B, Sig=214,8 Ref=360,100

| Peak # | RetTime [min] | Type | Width [min] | Area [mAU*s] | Height [mAU] | Area %  |
|--------|---------------|------|-------------|--------------|--------------|---------|
| 1      | 3.338         | MM   | 0.0629      | 35.03965     | 9.28029      | 0.9888  |
| 2      | 3.436         | MM   | 0.0513      | 16.59366     | 5.39154      | 0.4683  |
| 3      | 4.080         | MM   | 0.0796      | 35.57336     | 7.45282      | 1.0039  |
| 4      | 5.113         | MM   | 0.0841      | 3456.31445   | 684.99646    | 97.5390 |

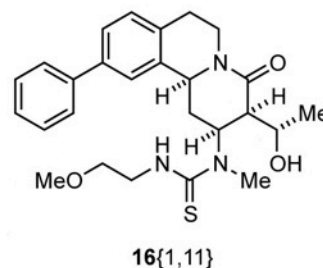

MS Spectrum

\*MSD1 SPC, time=5.063.5.300 of Z:\02-10\GRANGER\260210-BAG-2-54-11-01627.D MM-ES, Pos, Scan, Frag: 100, "Positive io

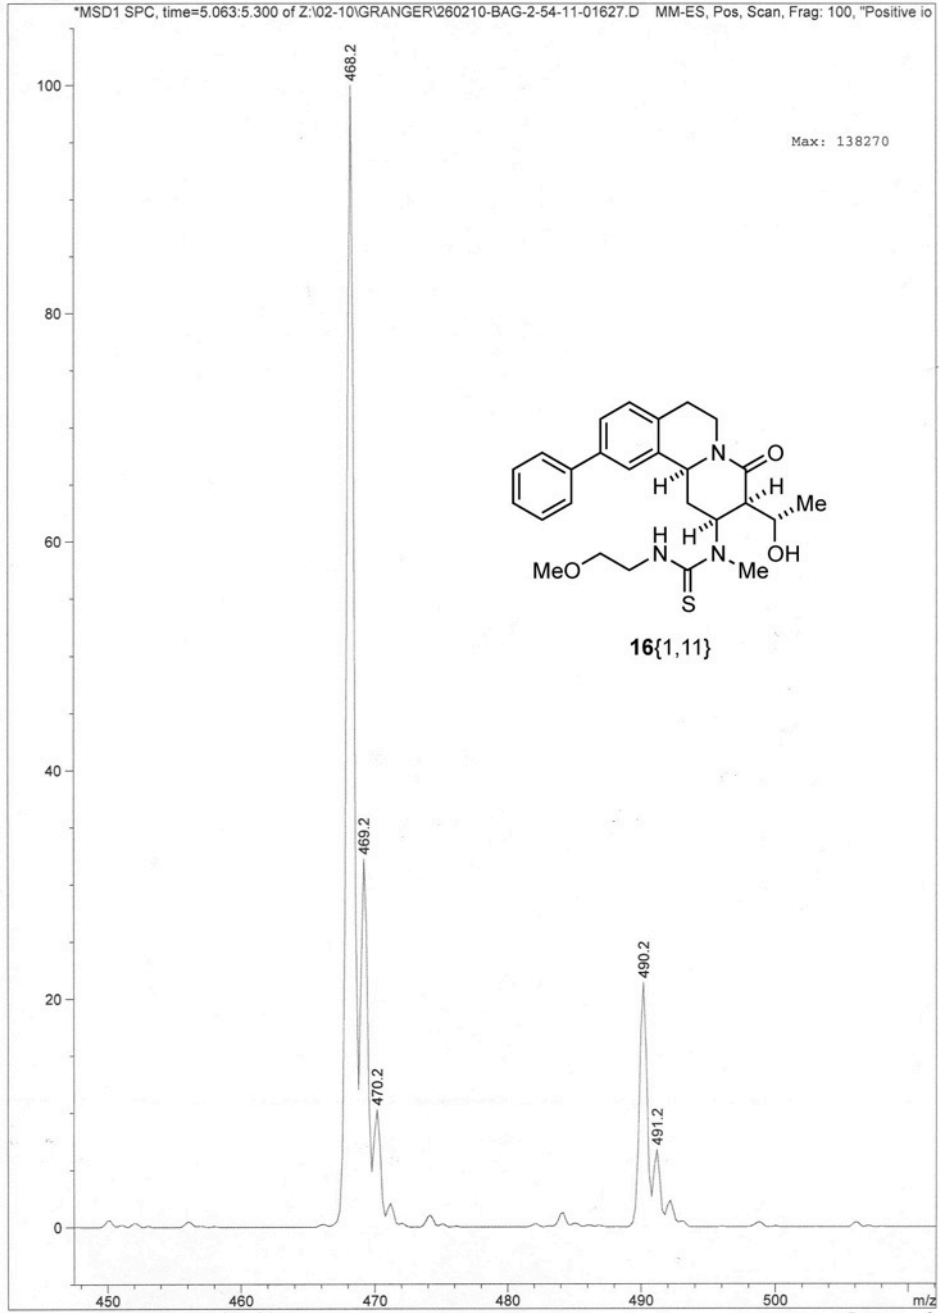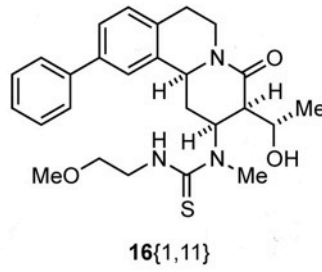



600 MHz mmrox  
 BAQ-2-54-6  
 exp# Carbon

|             |            |            |          |
|-------------|------------|------------|----------|
| date        | Aug 4 2010 | temp       | 27.0     |
| time        | 15:00      | time       | 0.20     |
| file        | 40322.6    | exp        | 0.008    |
| ACQUISITION | pw90       | hst        | 7.800    |
| sw          | 40322.6    | atfa       | 10.000   |
| dc          | 2.1200     | flags      | n        |
| td          | 17000      | l1         | n        |
| bs          | 6.4        | l2         | n        |
| ds          | 2.000      | dp         | y        |
| d1          | 4.000      | ms         | n        |
| ct          | 3904       | PROCESsing | mm       |
| TRANSMITTER | 1b         | fn         | 0.50     |
| tn          | C13        | DISPLAY    | not used |
| frq         | 150.824    | sp         | -754.3   |
| lpr         | 2.500      | wp         | 30915.4  |
| pv          | 2.600      | ft1        | 3566.1   |
| DECOUPLER   | H1         | ftp        | 7.3      |
| dnf         | 0          | tp         | 48.1     |
| st          | 0          | pl         | 0        |
| dim         | YYY        | PLoT       | 250      |
| dpr         | 46         | wc         | 0        |
| dmf         | 15337      | th         | 243368   |
|             | at         | cdc        | ph       |

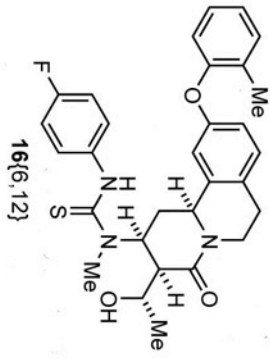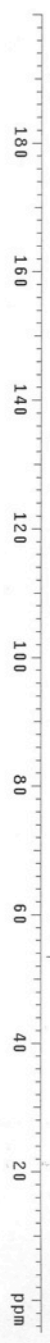

Data File Z:\02-10\GRANGER\260210-BAG-2-54-61-01637.D  
 Sample Name: BAG-2-54-6

```

=====
Acq. Operator   : bretttag35@mail.utexas.edu
Acq. Instrument : LCMS                               Location : Vial 67
Injection Date  : 2/26/2010 11:45:29 PM
                                                    Inj Volume : 1.0 µl

Acq. Method     : C:\CHEM32\1\METHODS\SP NIH.M
Last changed    : 2/26/2010 11:45:17 PM by bretttag35@mail.utexas.edu
                  (modified after loading)
Analysis Method : C:\CHEM32\1\METHODS\DEF_LC.M
Last changed    : 2/25/2010 3:55:13 PM
                  (modified after loading)
Sample Info     : Easy-Access Method: 'SP NIH'
=====
  
```

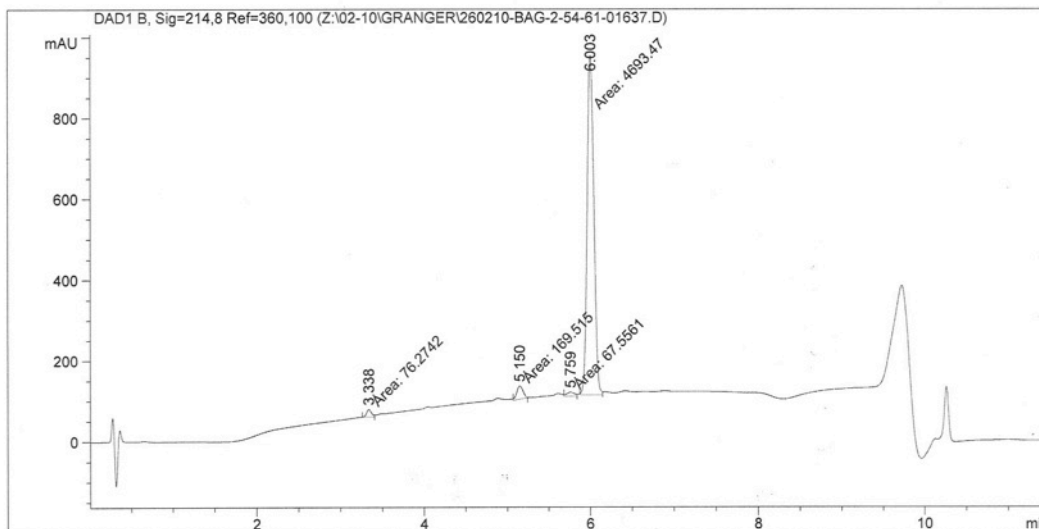

Area Percent Report

```

=====
Sorted By      :      Signal
Multiplier:    :      1.0000
Dilution:      :      1.0000
Use Multiplier & Dilution Factor with ISTDs
=====
  
```

Signal 1: DAD1 B, Sig=214,8 Ref=360,100

| Peak # | RetTime [min] | Type | Width [min] | Area [mAU*s] | Height [mAU] | Area %  |
|--------|---------------|------|-------------|--------------|--------------|---------|
| 1      | 3.338         | MM   | 0.0686      | 76.27418     | 18.52308     | 1.5234  |
| 2      | 5.150         | MM   | 0.0873      | 169.51480    | 32.37020     | 3.3857  |
| 3      | 5.759         | MM   | 0.1135      | 67.55612     | 9.92377      | 1.3493  |
| 4      | 6.003         | MM   | 0.0927      | 4693.47461   | 843.95105    | 93.7416 |

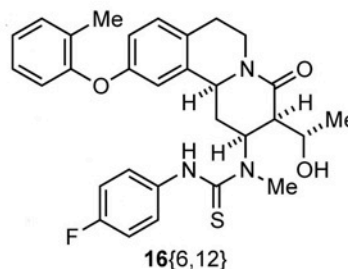

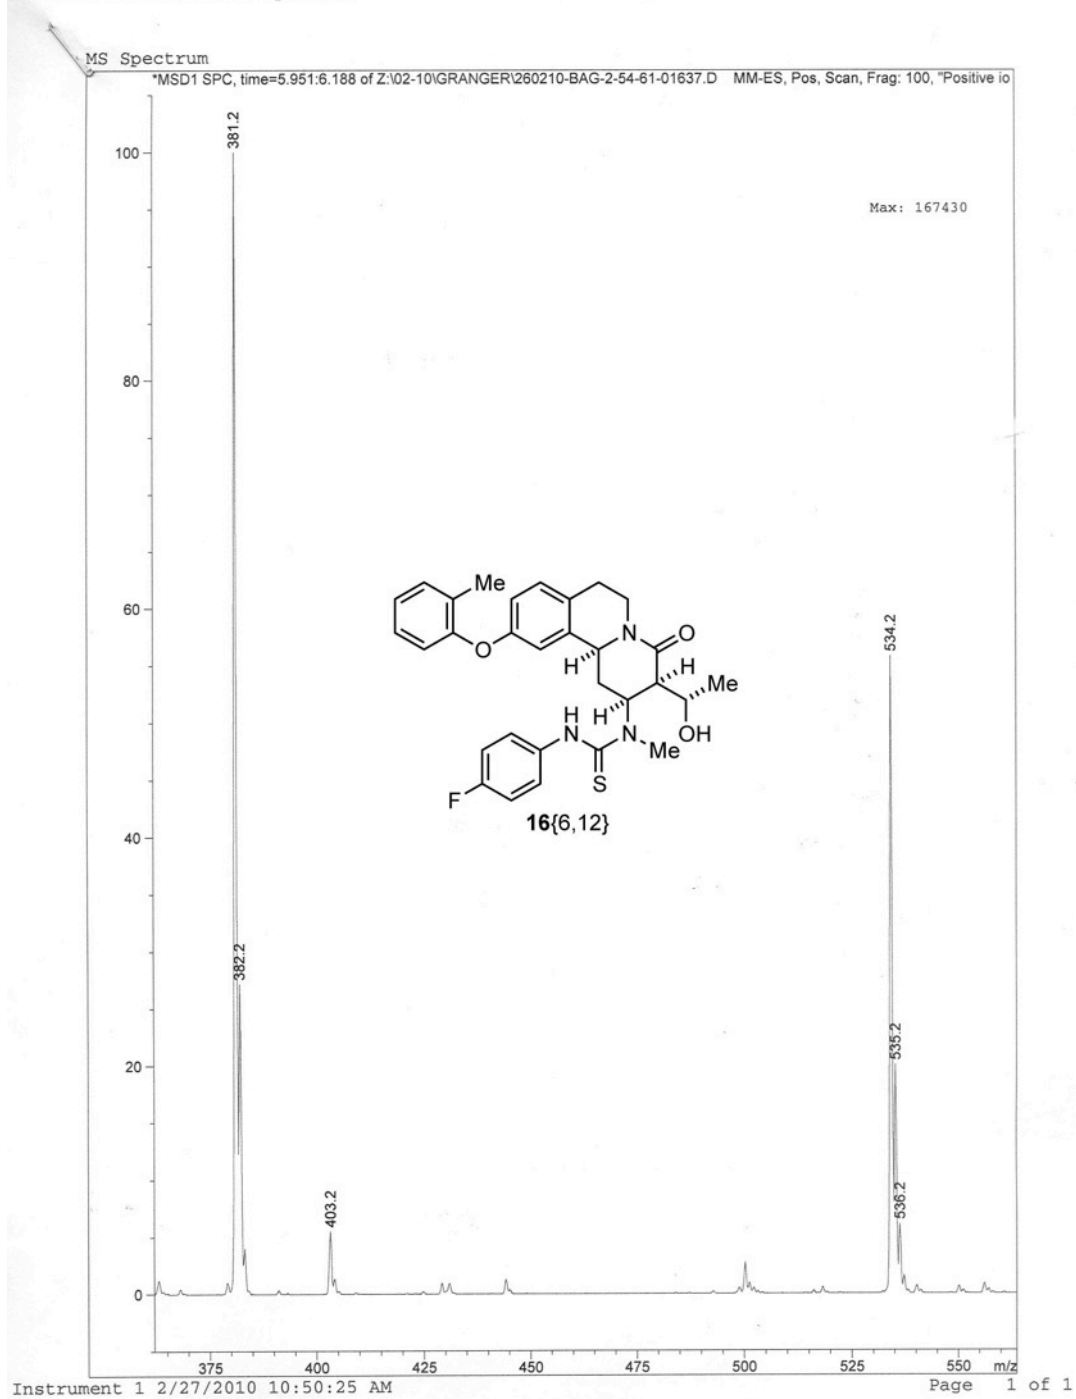

K1166  
 Archive directory:  
 Sample directory:  
 Pulse Sequence: s2pu1  
 Solvent: cdcl3  
 Ambient temperature  
 File: K1166\_s2pu1\_H1  
 INOVA-500 "mastro"  
 Relax - delay 2.000 sec  
 Acq. time 4.000 sec  
 Width 6410.3 Hz  
 16 repetitions  
 OBSERVE: 13C  
 PULSE PROGRAM  
 Line broadening 0.1 Hz  
 FT size 65536  
 Total time 1 min, 48 sec

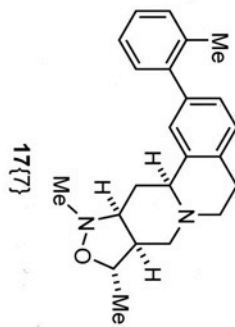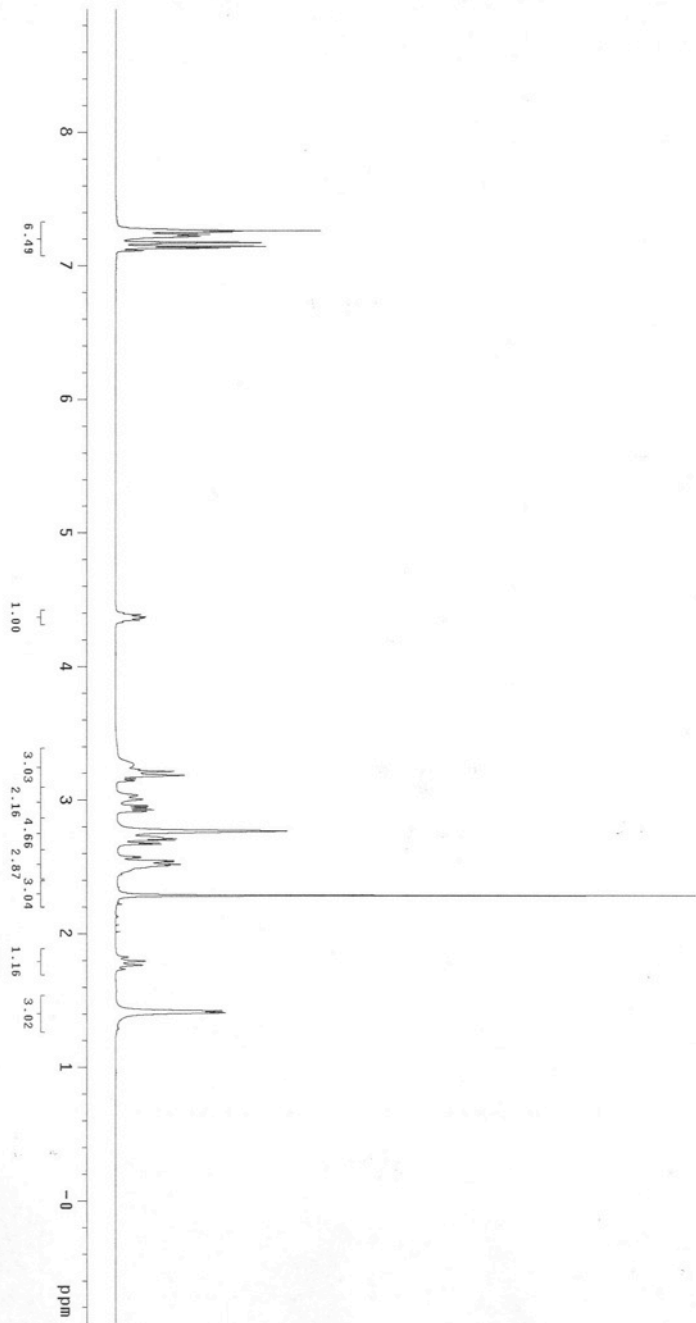



K1166  
 Archive directory:  
 Sample directory:  
 Pulse Sequence: s2pu1  
 Solvent: cdcl3  
 Ambient temperature  
 User: 1-14-87  
 File: K1166\_s2pu1\_C13  
 INOVA-500 "mastro"  
 Relax: delay 2.000 sec  
 Pulse: 30.0 degrees  
 Acq. time 1.300 sec  
 Width 24509.8 Hz  
 1000 Repetitions  
 0.1000 sec/pt  
 DECOUPLE H1: 399.8067105 MHz  
 Power 44 db  
 continuously on  
 MALT2000 Scanned  
 Data Folder: S1166  
 Line Broadening 2.0 Hz  
 FT size 65536  
 Total time 55 min, 9 sec

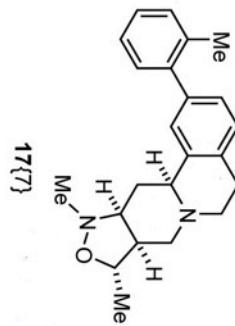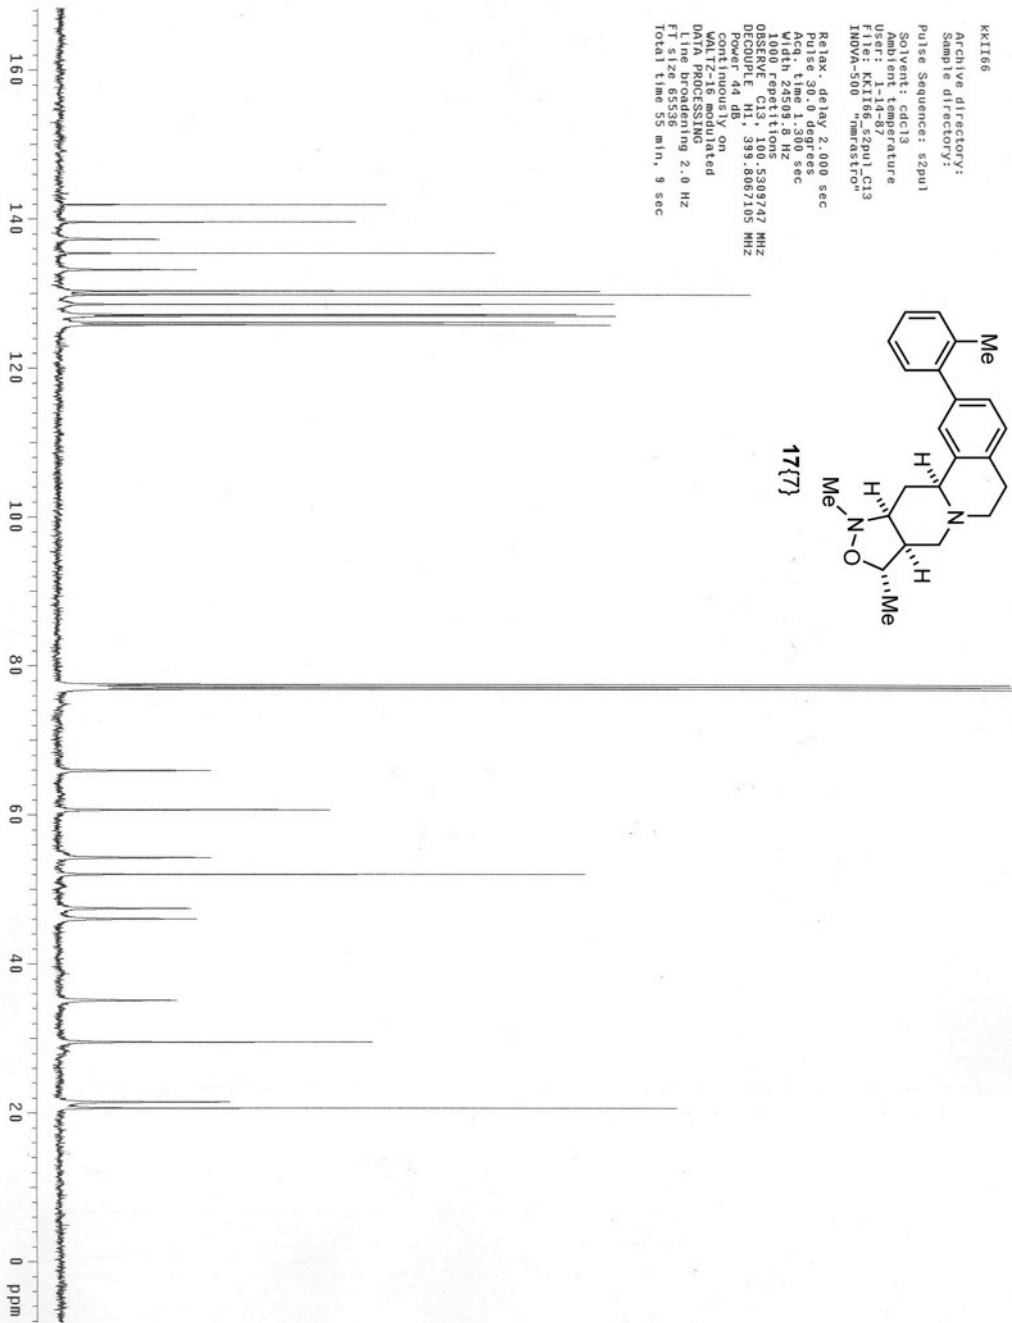

Data File L:\02-11\KANEDA\230211-KK2401-08543.D  
Sample Name: kk240

=====  
Acq. Operator : kyosuke.kaneda@cm.utexas.edu  
Acq. Instrument : LCMS Location : Vial 44  
Injection Date : 2/23/2011 9:33:14 PM Inj Volume : 1.0 µl  
Acq. Method : C:\CHEM32\1\METHODS\SP\_NIH.M  
Last changed : 2/23/2011 9:32:59 PM by kyosuke.kaneda@cm.utexas.edu  
(modified after loading)  
Analysis Method : C:\CHEM32\1\METHODS\DEF\_LC.M  
Last changed : 11/20/2006 4:14:44 AM  
Sample Info : Easy-Access Method: 'SP\_NIH'

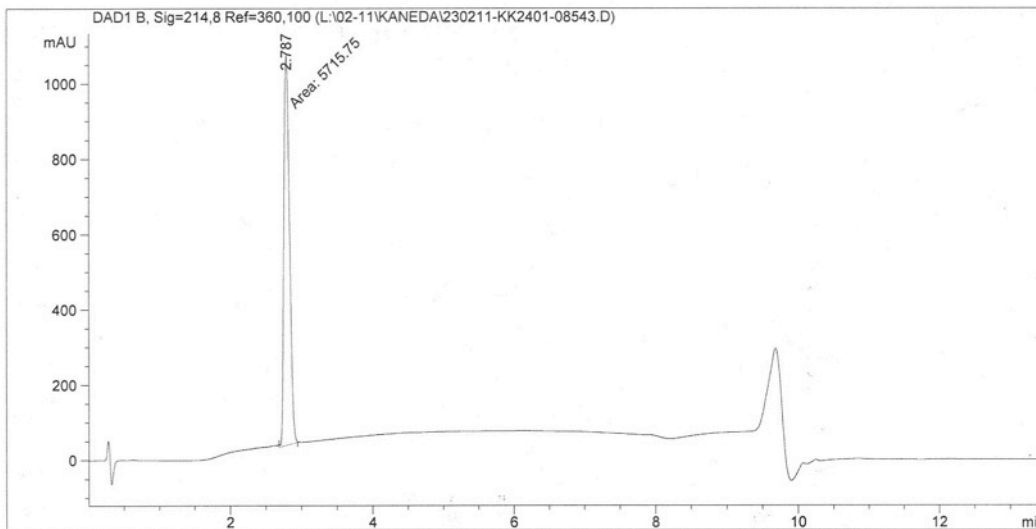

=====  
Area Percent Report  
=====

Sorted By : Signal  
Multiplier: : 1.0000  
Dilution: : 1.0000  
Use Multiplier & Dilution Factor with ISTDs

Signal 1: DAD1 B, Sig=214,8 Ref=360,100

| Peak # | RetTime [min] | Type | Width [min] | Area [mAU*s] | Height [mAU] | Area %   |
|--------|---------------|------|-------------|--------------|--------------|----------|
| 1      | 2.787         | MM   | 0.0917      | 5715.75342   | 1039.32715   | 100.0000 |

Totals : 5715.75342 1039.32715

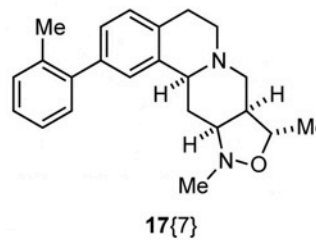

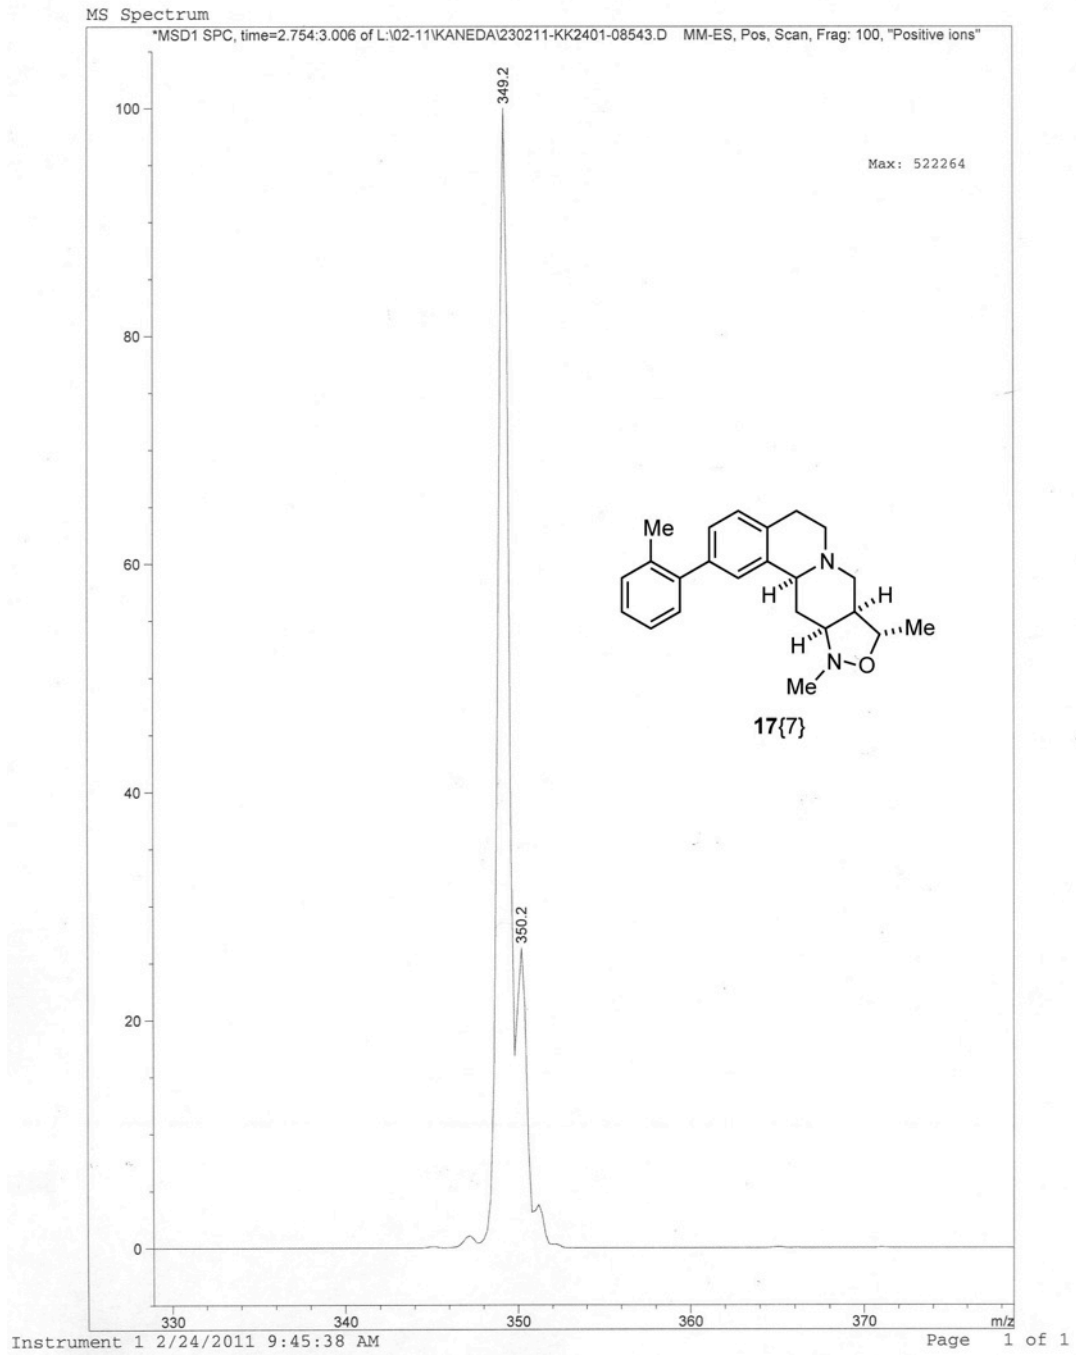

K1165  
 Archive directory:  
 Sample directory:  
 Pulse Sequence: s2pul1  
 Solvent: cdcl3  
 Ambient temperature:  
 File: K1165\_s2pul1\_H1  
 INOVA-500 "hmadstro"  
 Relax: delay 2.000 sec  
 Acq: time 0.000 sec  
 Acq: jump 4.000 sec  
 Width 6410.3 Hz  
 16 repetitions:  
 OBSERVE: 313.99.8047115 MHz  
 PULSEPROG: zgpg30  
 Line broadening 0.1 Hz  
 FT size 65536  
 Total time 1 min, 48 sec

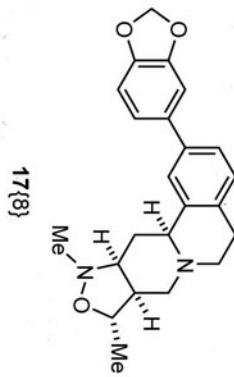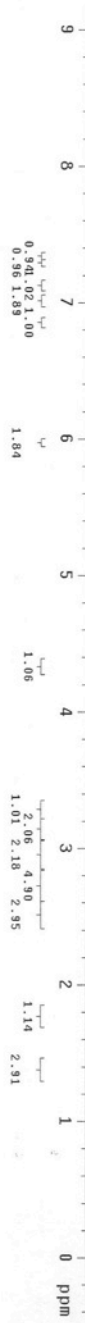

KI165  
Archive directory:  
Sample directory:  
Pulse Sequence: s2pul  
Solvent: cdcl3  
Ambient temperature  
User: 1-14-87  
File: KI165\_s2pul\_C13  
INOVA-500 "mastro"  
Relax. delay 2.000 sec  
Pulse: 30.0 degrees  
Acq. time 1.300 sec  
Width 24509.8 Hz  
Observed frequencies 5309747 MHz  
Decouple H1: 399.8067105 MHz  
Power 44 db  
continously on  
DATA PROCESSING  
Line broadening 2.0 Hz  
FT size 65538  
Total time 55 min, 9 sec

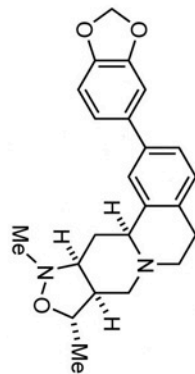

17(8)

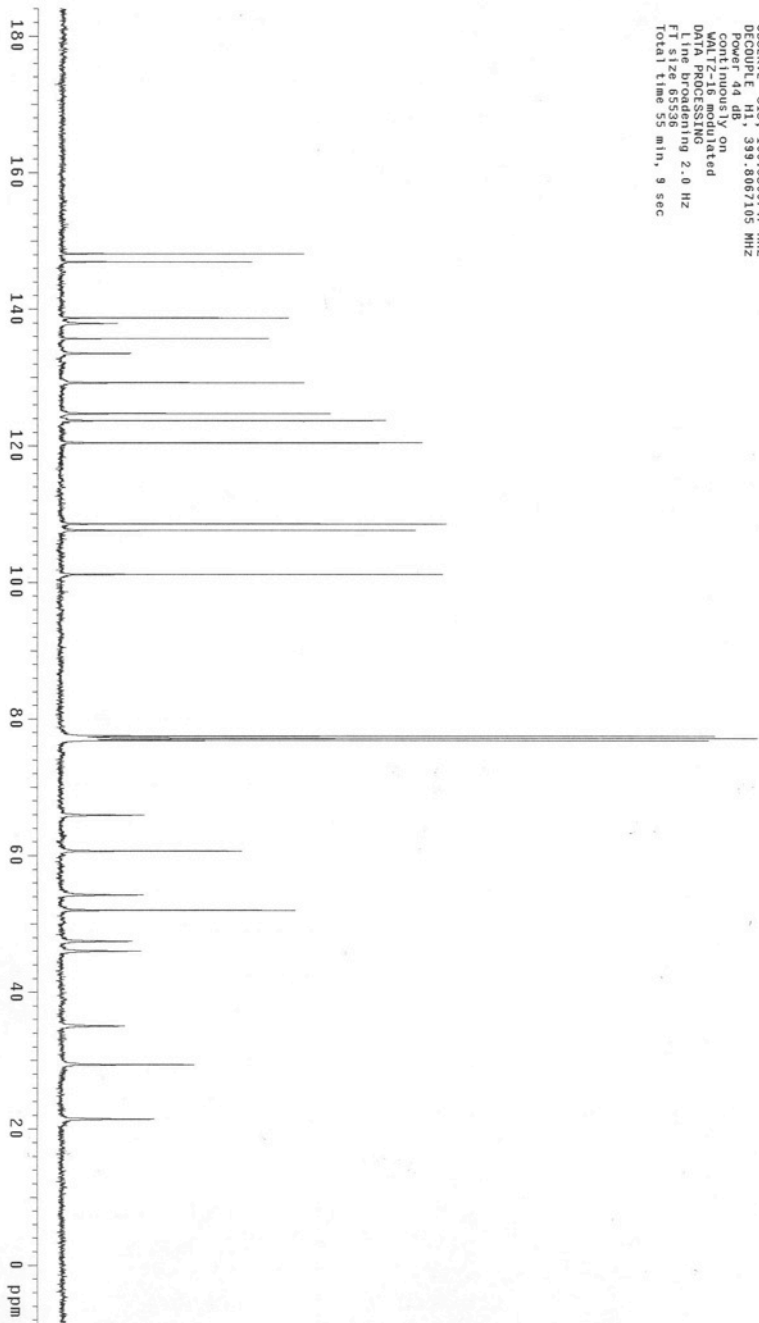

```

=====
Acq. Operator   : bretttag35@mail.utexas.edu
Acq. Instrument : LCMS                               Location : Vial 49
Injection Date  : 9/17/2011 1:17:48 AM
Inj Volume     : 1.0 µl

Acq. Method    : C:\CHEM32\1\METHODS\SP_NIH.M
Last changed   : 9/17/2011 1:17:33 AM by bretttag35@mail.utexas.edu
                (modified after loading)
Analysis Method: C:\CHEM32\1\METHODS\DEF_LC.M
Last changed   : 11/20/2006 4:14:44 AM
Sample Info    : Easy-Access Method: 'SP_NIH'
  
```

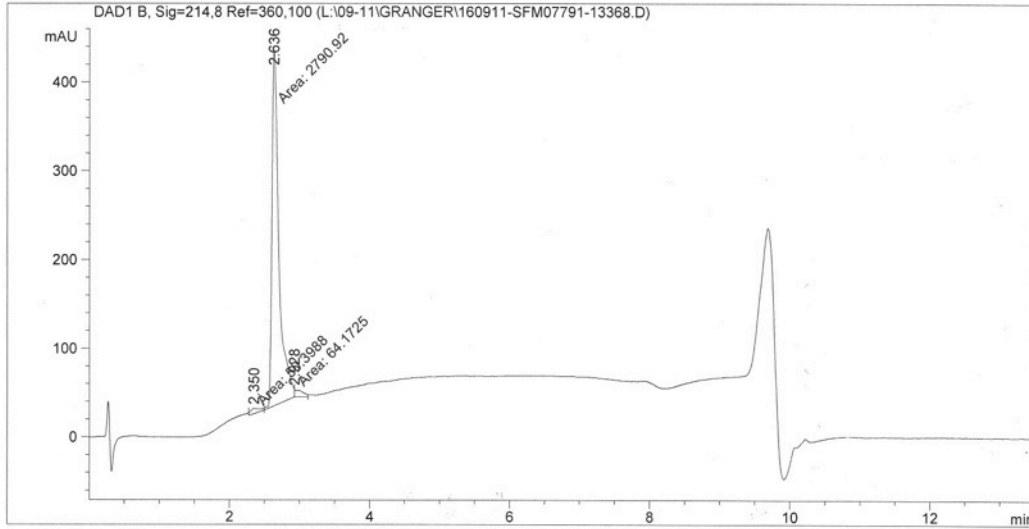

=====  
 Area Percent Report  
 =====

```

Sorted By      :      Signal
Multiplier:    :      1.0000
Dilution:      :      1.0000
Use Multiplier & Dilution Factor with ISTDs
  
```

Signal 1: DAD1 B, Sig=214,8 Ref=360,100

| Peak # | RetTime [min] | Type | Width [min] | Area [mAU*s] | Height [mAU] | Area %  |
|--------|---------------|------|-------------|--------------|--------------|---------|
| 1      | 2.350         | MM   | 0.1429      | 50.39883     | 5.87624      | 1.7346  |
| 2      | 2.636         | MM   | 0.1153      | 2790.91650   | 403.48798    | 96.0567 |
| 3      | 2.928         | MM   | 0.1039      | 64.17245     | 8.46443      | 2.2087  |

Totals :                    2905.48779   417.82865

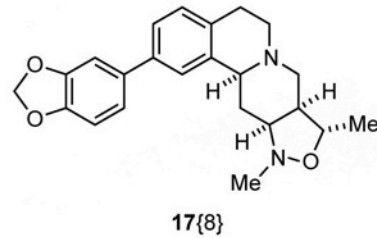

Print of window 79: MS Spectrum  
Data File : L:\09-11\GRANGER\160911-SFM07791-13368.D  
Sample Name : SFM0779

=====  
Acq. Operator : bretttag35@mail.utexas.edu  
Acq. Instrument : LCMS Location : Vial 49  
Injection Date : 9/17/2011 1:17:48 AM Inj : 1  
Inj Volume : 1.0 µl  
Acq. Method : C:\CHEM32\1\METHODS\SP\_NIH.M  
Last changed : 9/17/2011 1:17:33 AM by bretttag35@mail.utexas.edu  
(modified after loading)  
Analysis Method : C:\CHEM32\1\METHODS\DEF\_LC.M  
Last changed : 11/20/2006 4:14:44 AM  
Sample Info : Easy-Access Method: 'SP\_NIH'

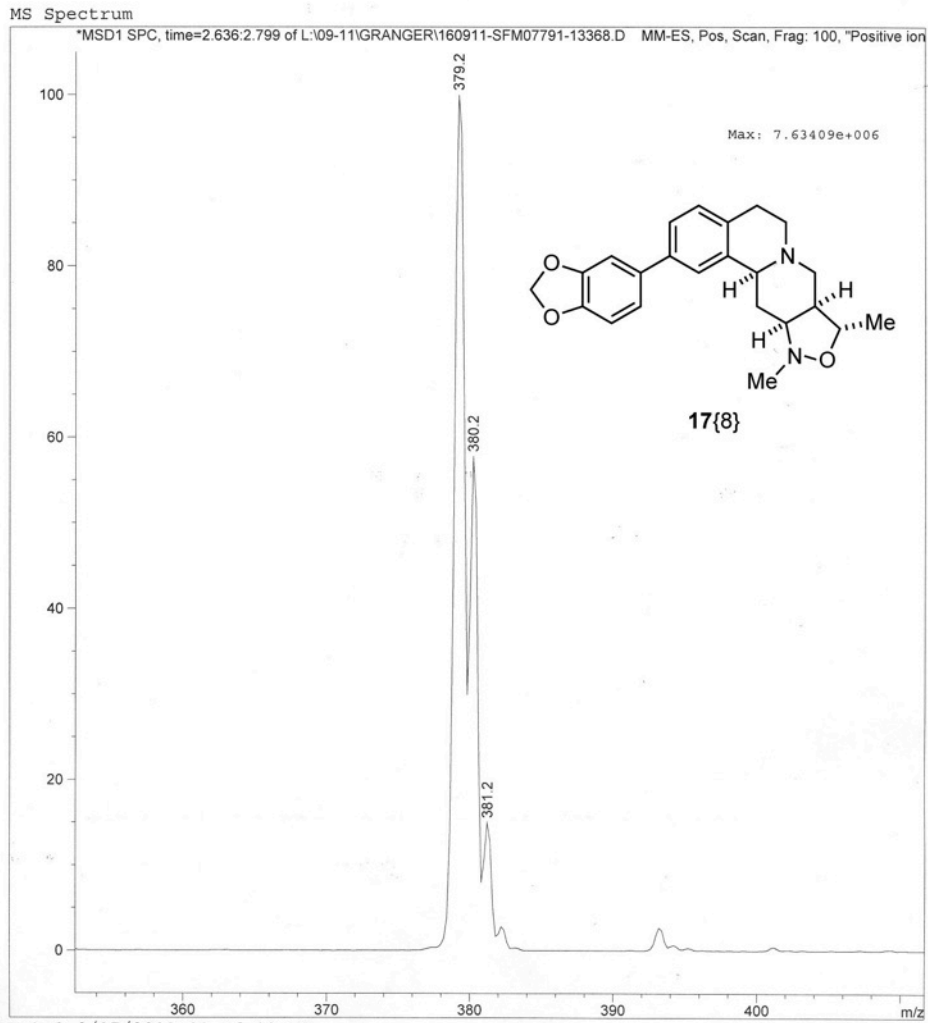

K1167  
 Archive directory:  
 Sample directory:  
 Pulse Sequence: s2pul1  
 Solvent: cdcl3  
 Ambient temperature  
 File: K1167\_s2pul1\_H1  
 INOVA-500 "mamastro"  
 Relax - delay 2.000 sec  
 Acq. time 4.000 sec  
 Width 6410.3 Hz  
 16 repetitions  
 OBSERVE: 13C  
 PULSE PROGRAM  
 Line Broadening 0.1 Hz  
 FT size 65536  
 Total time 1 min, 48 sec

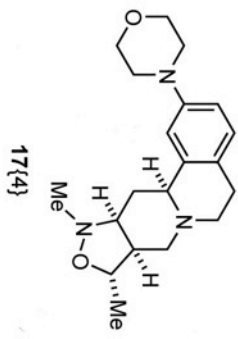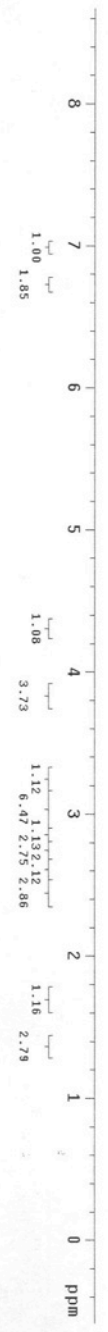



K1167  
 Archive directory:  
 Sample directory:  
 Pulse Sequence: s2pul  
 Solvent: cdcl3  
 Ambient temperature  
 User: 1-14-87  
 Filter: K1167\_s2pul\_C13  
 INOVA-500 "mrastr0"  
 Relax. delay 2.000 sec  
 Pulse 30.0 degrees  
 Acq. time 1.360 sec  
 Width 24509.8 Hz  
 Observed frequency 5309747 MHz  
 OBSERVE H1 399.8067105 MHz  
 DECOUPLE H1 399.8067105 MHz  
 Power 44 db  
 continuously on  
 continuously on  
 continuously on  
 DATA PROCESSING  
 Line broadening 2.0 Hz  
 FT size 65536  
 Total time 55 min, 9 sec

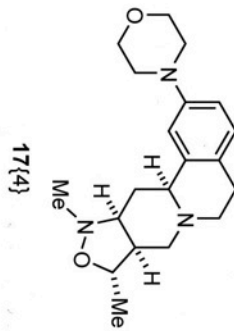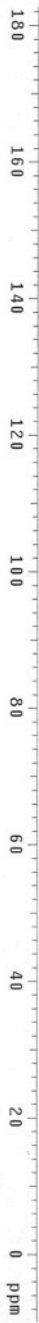

Data File L:\06-11\KANEDA\070611-KK274P1-11105.D  
Sample Name: kk274p

=====  
Acq. Operator : kyosuke.kaneda@cm.utexas.edu  
Acq. Instrument : LCMS Location : Vial 28  
Injection Date : 6/7/2011 10:16:47 AM Inj Volume : 1.0 µl  
Acq. Method : C:\CHEM32\1\METHODS\LCMS 12MIN GRADIENT.M  
Last changed : 6/7/2011 10:16:26 AM by kyosuke.kaneda@cm.utexas.edu  
(modified after loading)  
Analysis Method : C:\CHEM32\1\METHODS\DEF\_LC.M  
Last changed : 11/20/2006 4:14:44 AM  
Sample Info : Easy-Access Method: 'LCMS 12MIN GRADIENT'

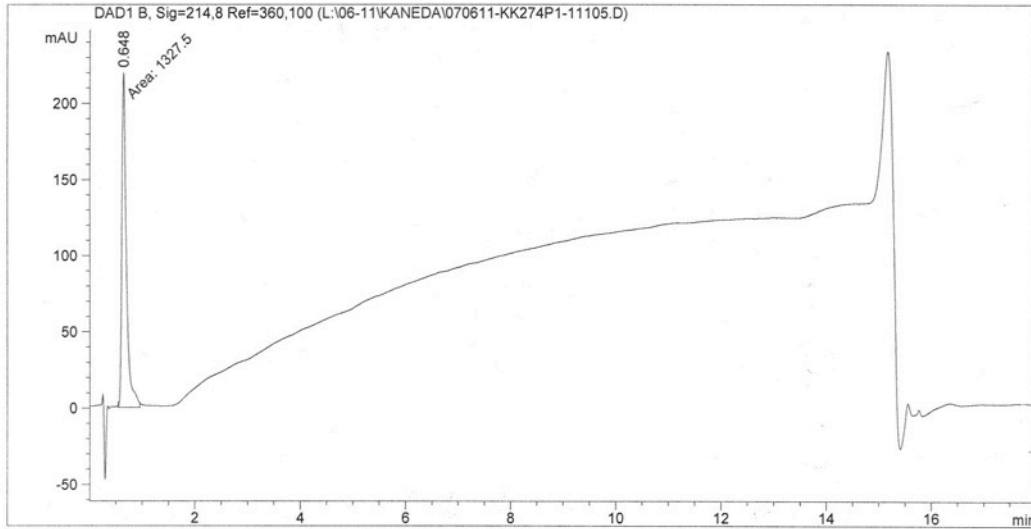

=====  
Area Percent Report  
=====

Sorted By : Signal  
Multiplier: : 1.0000  
Dilution: : 1.0000  
Use Multiplier & Dilution Factor with ISTDs

Signal 1: DAD1 B, Sig=214,8 Ref=360,100

| Peak # | RetTime [min] | Type | Width [min] | Area [mAU*s] | Height [mAU] | Area %   |
|--------|---------------|------|-------------|--------------|--------------|----------|
| 1      | 0.648         | MM   | 0.1004      | 1327.50012   | 220.27107    | 100.0000 |

Totals : 1327.50012 220.27107

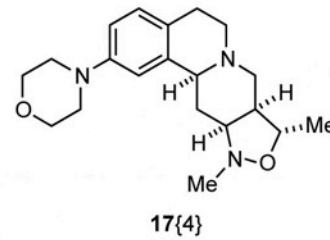

Print of window 79: MS Spectrum  
Data File : L:\06-11\KANEDA\070611-KK274P1-11105.D  
Sample Name : kk274p

=====  
Acq. Operator : kyosuke.kaneda@cm.utexas.edu  
Acq. Instrument : LCMS  
Injection Date : 6/7/2011 10:16:47 AM  
Location : Vial 28  
Inj : 1  
Inj Volume : 1.0 µl  
Acq. Method : C:\CHEM32\1\METHODS\LCMS 12MIN GRADIENT  
Last changed : 6/7/2011 10:16:26 AM by kyosuke.kaneda@cm.utexas.edu  
(modified after loading)  
Analysis Method : C:\CHEM32\1\METHODS\DEF\_LC.M  
Last changed : 11/20/2006 4:14:44 AM  
Sample Info : Easy-Access Method: 'LCMS 12MIN GRADIENT'

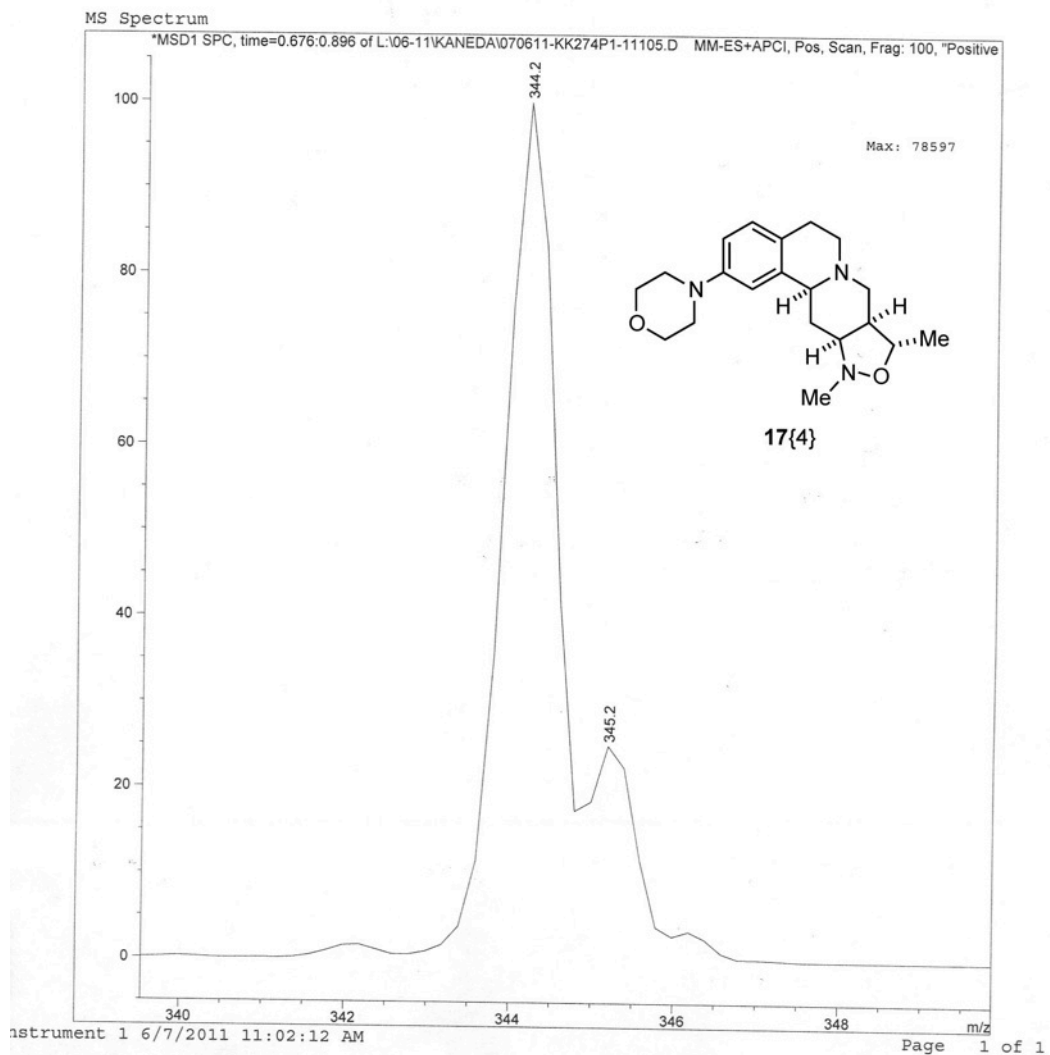

KX261P  
 aminonolconol  
 Archive directory:  
 Sample directory:  
 Pulse Sequence: s2pu1  
 Solvent: cdcl3  
 Ambient temperature  
 File: KX261P\_s2pu1\_H1  
 INOVA-500 -1methylol-  
 Relax. delay: 2.000 sec  
 Pulse: 30.0 degrees  
 Acq. time: 4.000 sec  
 Width: 6410.3 Hz  
 Spectrometer: 399.8067115 MHz  
 OS: 32-bit  
 DATA PROCESSING  
 Line Broadening: 0.1 Hz  
 FT size: 65536  
 Total time: 3 min, 24 sec

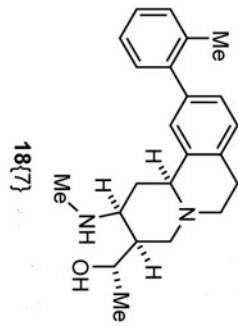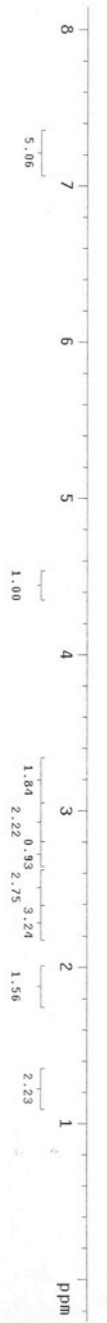

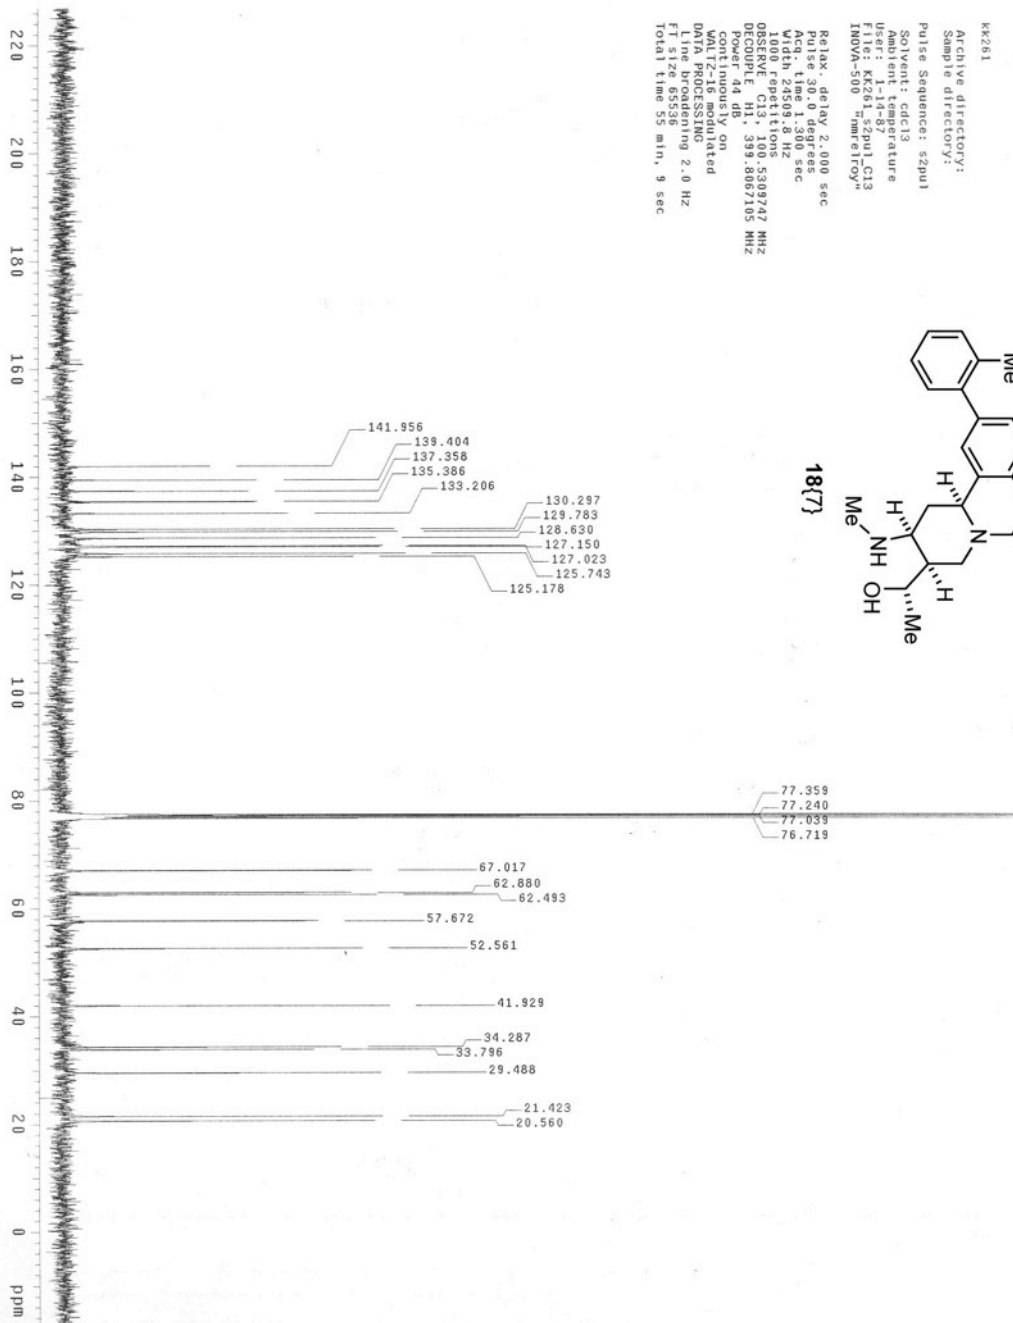

KK261

Archive directory:  
 Sample directory:  
 Pulse Sequence: szpul1  
 Solvent: cdcl3  
 Ambient temperature  
 User: 1-14-87  
 File: KK261\_s2pul1\_C13  
 INOVA-500 "Hmefroy"

Relax. delay: 2.000 sec  
 Pulse: 30.0 degrees  
 Acq. time: 1.380 sec  
 Width: 24509.8 Hz  
 1000 spectral lines  
 OBSERVE: 13C  
 DECOUPLE: H1, 399.8687105 MHz  
 Power: 44 dB  
 continuously on  
 MULTI-PROCESSED  
 DMF/PROCESSED  
 Line broadening: 2.0 Hz  
 FT size: 65538  
 Total time: 55 min, 9 sec

Data File L:\03-11\KANEDA\110311-KK2611-08961.D  
Sample Name: kk261

=====  
Acq. Operator : kyosuke.kaneda@cm.utexas.edu  
Acq. Instrument : LCMS Location : Vial 16  
Injection Date : 3/11/2011 7:42:24 PM Inj Volume : 1.0 µl  
Acq. Method : C:\CHEM32\1\METHODS\SP\_NIH.M  
Last changed : 3/11/2011 7:42:10 PM by kyosuke.kaneda@cm.utexas.edu  
(modified after loading)  
Analysis Method : C:\CHEM32\1\METHODS\DEF\_LC.M  
Last changed : 11/20/2006 4:14:44 AM  
Sample Info : Easy-Access Method: 'SP\_NIH'

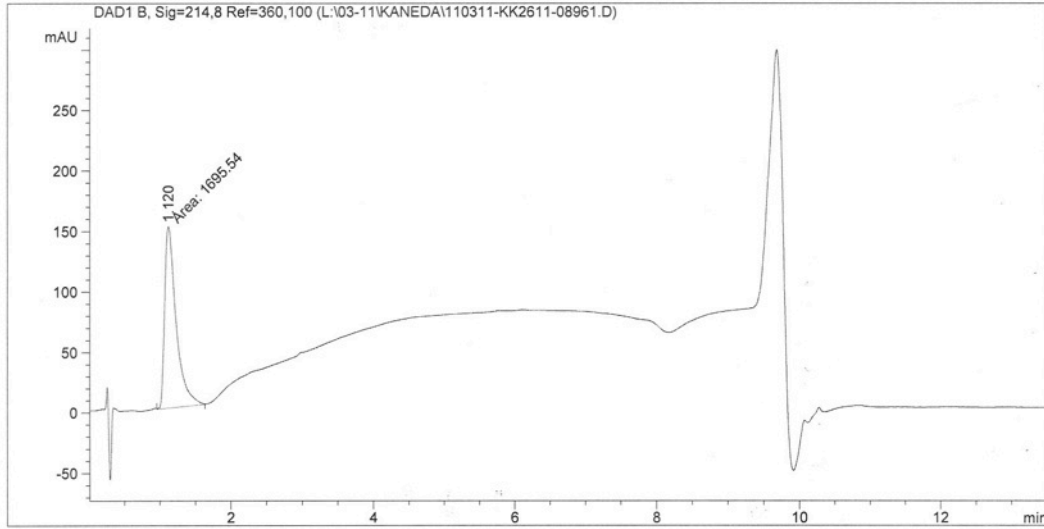

=====  
Area Percent Report  
=====

Sorted By : Signal  
Multiplier: : 1.0000  
Dilution: : 1.0000  
Use Multiplier & Dilution Factor with ISTDs

Signal 1: DAD1 B, Sig=214,8 Ref=360,100

| Peak # | RetTime [min] | Type | Width [min] | Area [mAU*s] | Height [mAU] | Area %   |
|--------|---------------|------|-------------|--------------|--------------|----------|
| 1      | 1.120         | MM   | 0.1880      | 1695.53796   | 150.33015    | 100.0000 |

Totals : 1695.53796 150.33015

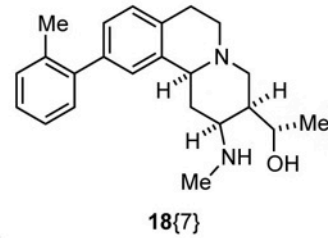

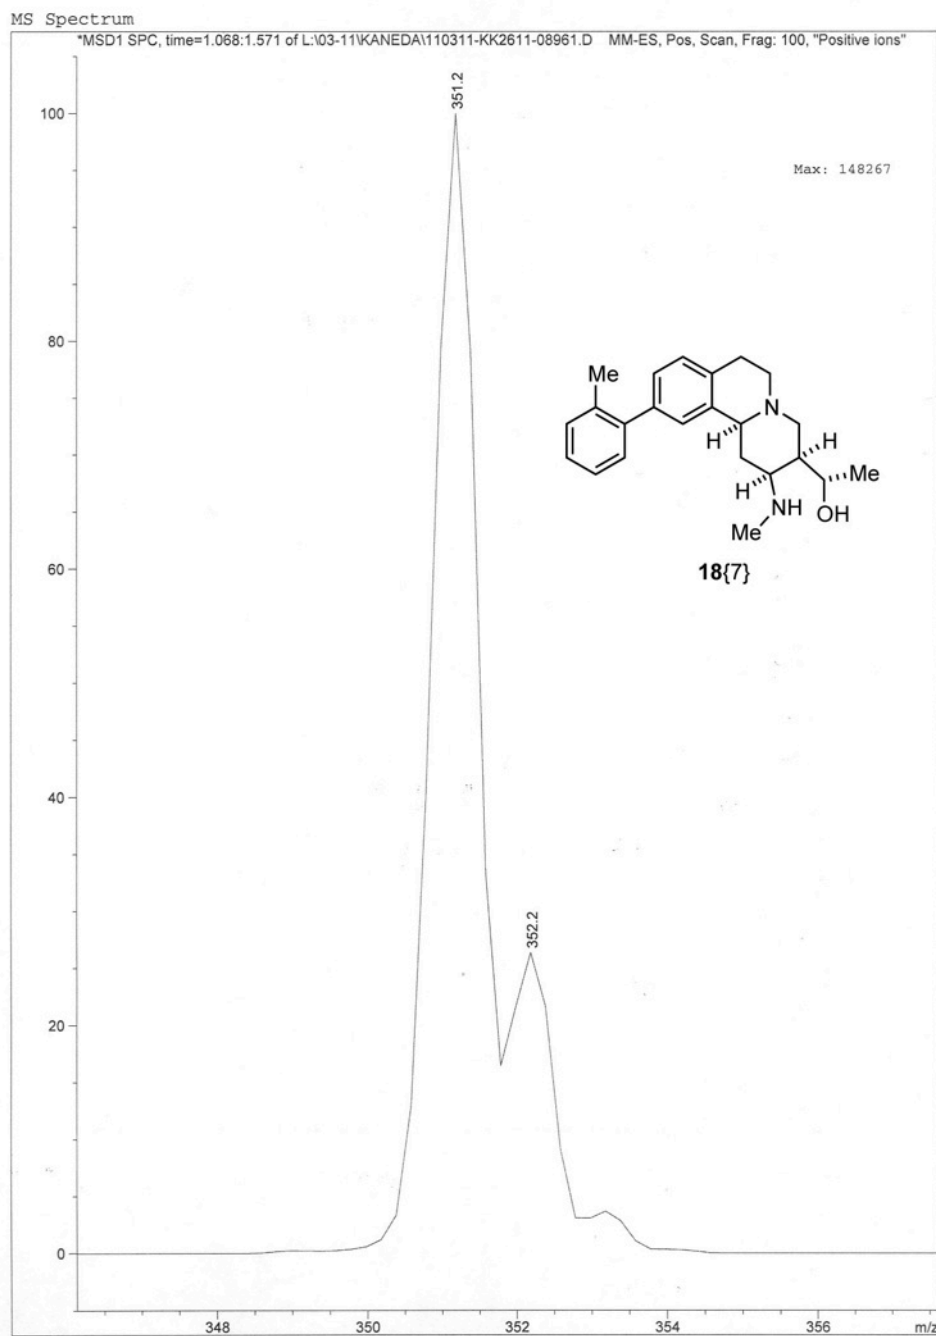

KK255  
 furan-amide  
 Archive directory:  
 Sample directory:  
 Pulse Sequence: s2pu1  
 Solvent: cdcl3  
 Ambient temperature  
 File: KK255\_s2pu1.H1  
 INOVA-500 "mercury"  
 Relax. delay 2.000 sec  
 Pulse: 30.0 degrees  
 Acq. time 4.000 sec  
 Width 6410.3 Hz  
 32 Spectrums 99.8067113 MHz  
 0.25 sec per 11  
 DATA PROCESSING  
 Line broadening 0.1 Hz  
 FT size 65536  
 Total time 3 min, 24 sec

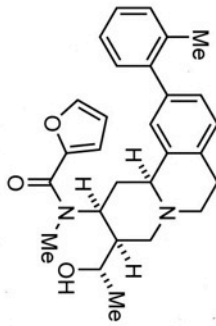

19{7,3}

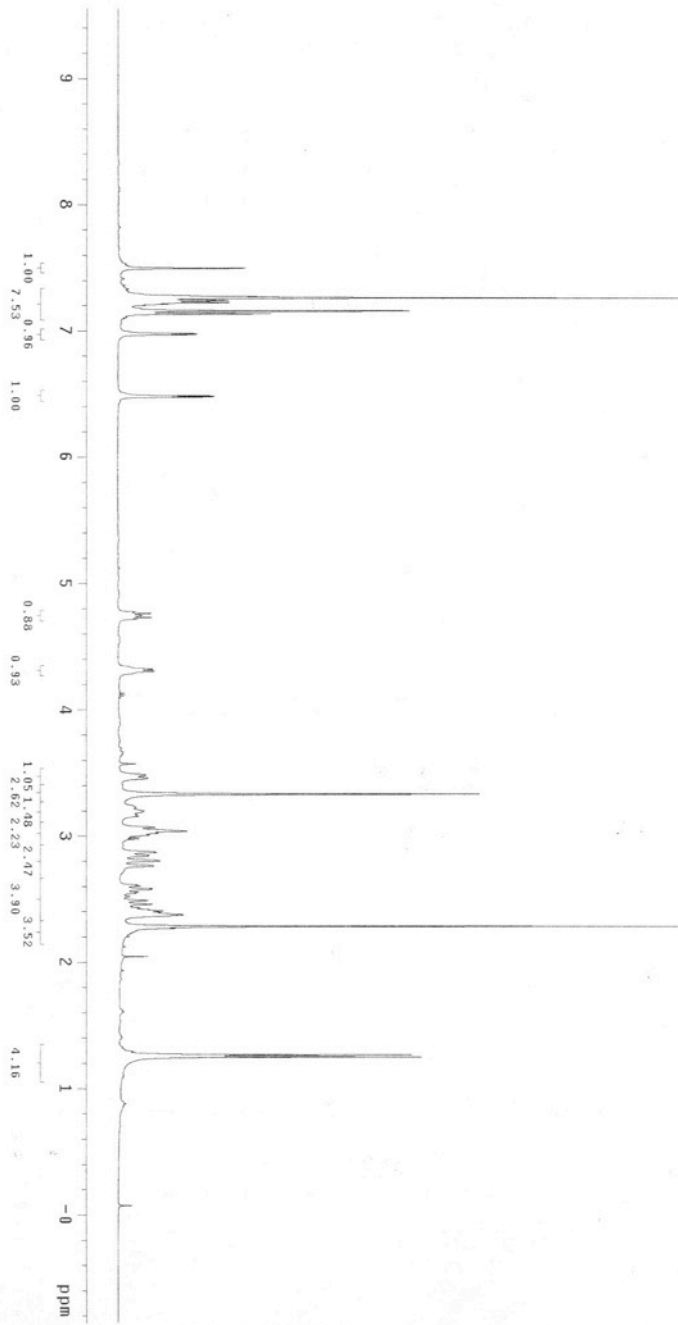



KZ255  
Furan-amide  
Archive directory:  
Sample directory:  
Pulse Sequence: s2pul1  
Solvent: cdcl3  
Ambient temperature  
User: 1-14-87  
F1 Nuc: KZ255\_s2pul\_C13  
INSTR: 500 "mmClProg"  
Relax. delay 2.000 sec  
Pulse 30.0 degrees  
Acq. time 1.300 sec  
Width 24509.8 Hz  
VFO 100.626149 MHz  
OBSERVE C13 100.5309747 MHz  
DECOUPLE H1 399.8067105 MHz  
Power 44 db  
continously on  
VFO2 100.626149 MHz  
DATA PROCESSING  
Line Broadening 2.0 Hz  
FT size 65536  
Total time 55 min, 9 sec

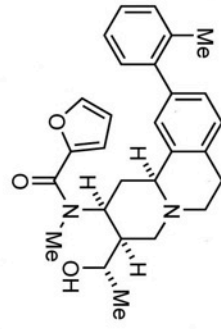

19{7,3}

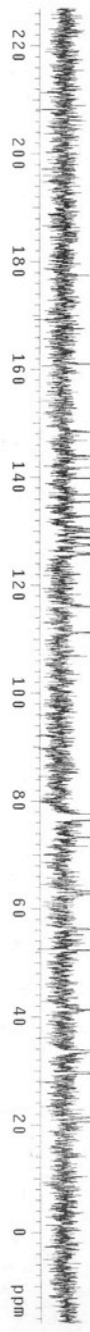

Data File L:\09-11\GRANGER\160911-SFM07871-13369.D  
Sample Name: SFM0787

=====  
Acq. Operator : bretttag35@mail.utexas.edu  
Acq. Instrument : LCMS Location : Vial 50  
Injection Date : 9/17/2011 1:32:48 AM Inj Volume : 1.0 µl  
Acq. Method : C:\CHEM32\1\METHODS\SP\_NIH.M  
Last changed : 9/17/2011 1:32:33 AM by bretttag35@mail.utexas.edu  
(modified after loading)  
Analysis Method : C:\CHEM32\1\METHODS\DEF\_LC.M  
Last changed : 11/20/2006 4:14:44 AM  
Sample Info : Easy-Access Method: 'SP\_NIH'

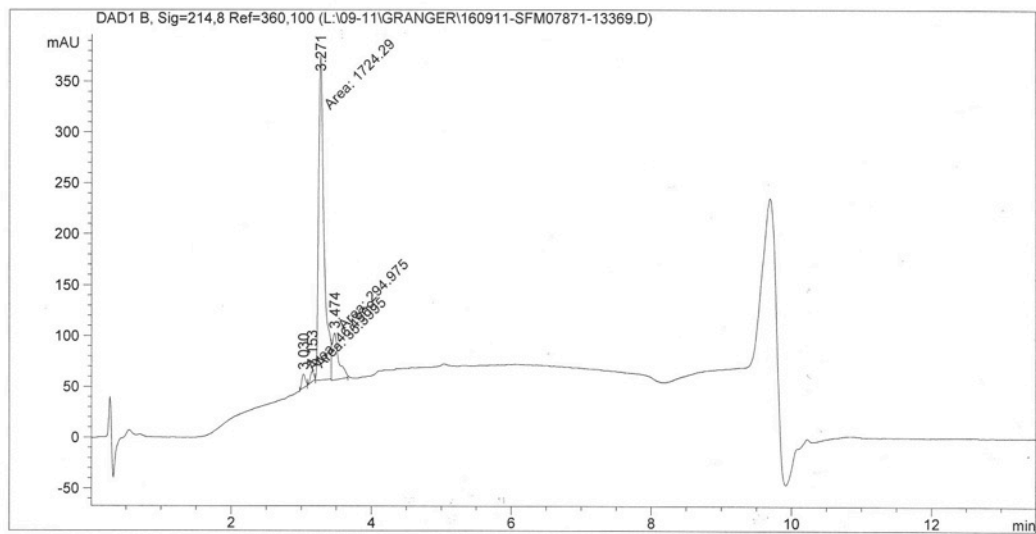

=====  
Area Percent Report  
=====

Sorted By : Signal  
Multiplier: : 1.0000  
Dilution: : 1.0000  
Use Multiplier & Dilution Factor with ISTDs

Signal 1: DAD1 B, Sig=214,8 Ref=360,100

| Peak # | RetTime [min] | Type | Width [min] | Area [mAU*s] | Height [mAU] | Area %  |
|--------|---------------|------|-------------|--------------|--------------|---------|
| 1      | 3.030         | MM   | 0.0562      | 46.49094     | 13.78585     | 2.2126  |
| 2      | 3.153         | MM   | 0.0556      | 35.39946     | 10.61999     | 1.6848  |
| 3      | 3.271         | MM   | 0.0899      | 1724.28870   | 319.64722    | 82.0639 |
| 4      | 3.474         | MM   | 0.1059      | 294.97543    | 46.44121     | 14.0387 |

Totals : 2101.15453 390.49427

Instrument 1 9/17/2011 11:48:52 AM

Page 1 of 2

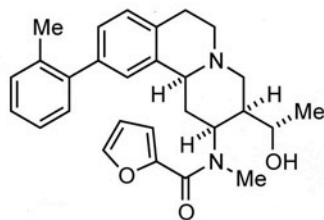

19{7,3}

Print of window 79: MS Spectrum  
Data File : L:\09-11\GRANGER\160911-SFM07871-13369.D  
Sample Name : SFM0787

=====  
Acq. Operator : bretttag35@mail.utexas.edu  
Acq. Instrument : LCMS Location : Vial 50  
Injection Date : 9/17/2011 1:32:48 AM Inj : 1  
Inj Volume : 1.0 µl  
Acq. Method : C:\CHEM32\1\METHODS\SP\_NIH.M  
Last changed : 9/17/2011 1:32:33 AM by bretttag35@mail.utexas.edu  
(modified after loading)  
Analysis Method : C:\CHEM32\1\METHODS\DEF\_LC.M  
Last changed : 11/20/2006 4:14:44 AM  
Sample Info : Easy-Access Method: 'SP\_NIH'

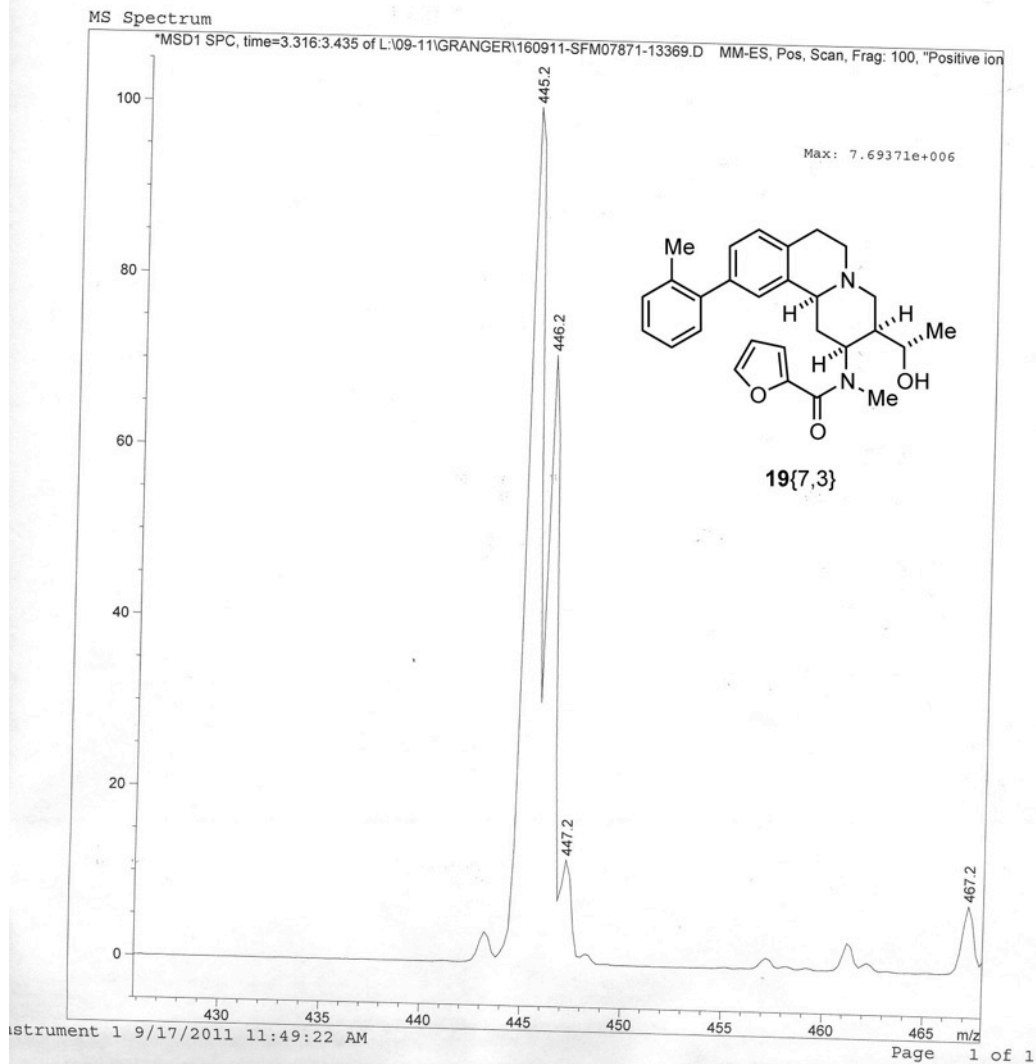

KK173  
 Archive directory:  
 Sample directory:  
 Pulse Sequence: s2pul  
 Solvent: cdcl3  
 Ambient temperature  
 File: KK173\_s2pul\_H1  
 INOVA-500 "nmr1roy"  
 Relax delay 2.000 sec  
 Acq. time 4.000 sec  
 Width 6410.3 Hz  
 16 Repetitions 99.8047115 MHz  
 DATA PROCESSING  
 Line broadening 0.1 Hz  
 FT size 65536  
 Total time 1 min., 48 sec

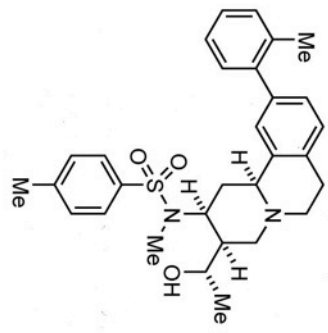

19f, 13j

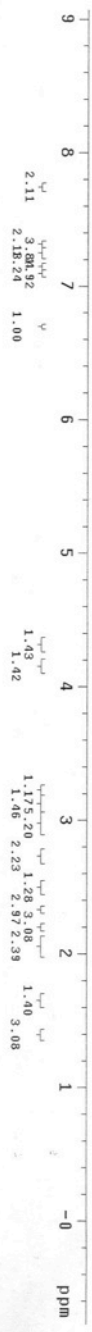

KK173p  
 Archive directory:  
 Sample directory:  
 Pulse Sequence: szpul  
 Solvent: cdcl3  
 Ambient temperature  
 User: 1-14-87  
 File: KK173p\_s2pul\_C13  
 INOVA-500 mmHrtyo  
 Relax. delay 2.000 sec  
 Pulse 30.0 degrees  
 Acq. time 1.300 sec  
 Width 24599.8 Hz  
 A1: 1000.000000  
 OBSERVE C13 1000.5309747 MHz  
 DECOUPLE H1 399.8067105 MHz  
 Power 44 db  
 continuously on  
 continuously on  
 continuously on  
 DATA PROCESSING  
 Line broadening 2.0 Hz  
 FT size 65536  
 Total time 55 min, 9 sec

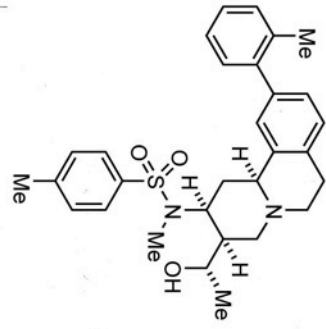

19{7,13}

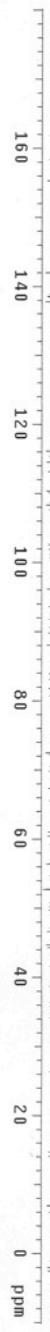

Data File L:\08-11\KANEDA\030811-KKII731-12645.D  
Sample Name: KKII73

=====  
Acq. Operator : kyosuke.kaneda@cm.utexas.edu Location : Vial 2  
Acq. Instrument : LCMS Inj Volume : 1.0 µl  
Injection Date : 8/3/2011 11:53:54 AM  
Acq. Method : C:\CHEM32\1\METHODS\SP NIH.M  
Last changed : 8/3/2011 11:53:33 AM by kyosuke.kaneda@cm.utexas.edu  
(modified after loading)  
Analysis Method : C:\CHEM32\1\METHODS\DEF\_LC.M  
Last changed : 11/20/2006 4:14:44 AM  
Sample Info : Easy-Access Method: 'SP NIH'

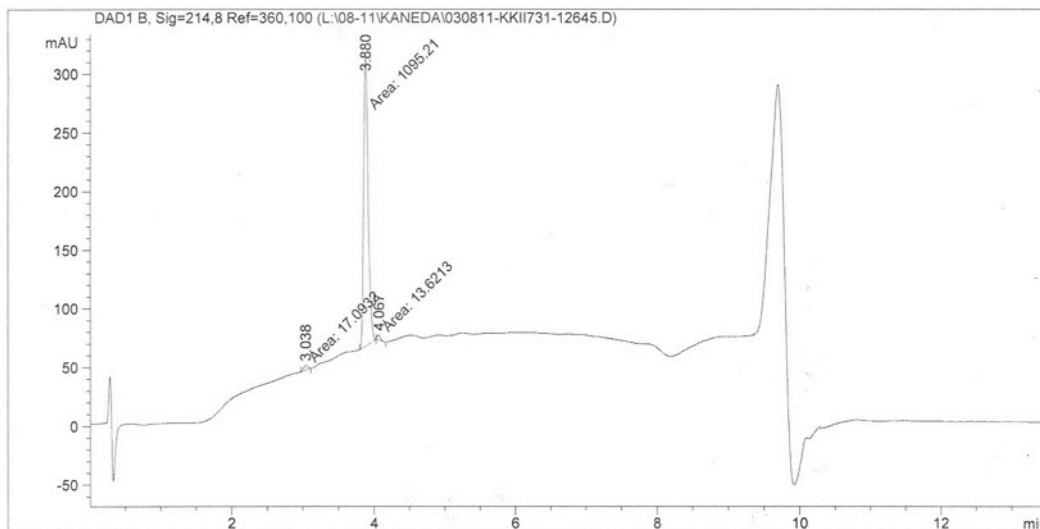

=====  
Area Percent Report  
=====

Sorted By : Signal  
Multiplier: : 1.0000  
Dilution: : 1.0000  
Use Multiplier & Dilution Factor with ISTDs

Signal 1: DAD1 B, Sig=214,8 Ref=360,100

| Peak # | RetTime [min] | Type | Width [min] | Area [mAU*s] | Height [mAU] | Area %  |
|--------|---------------|------|-------------|--------------|--------------|---------|
| 1      | 3.038         | MM   | 0.0648      | 17.09324     | 4.39901      | 1.5182  |
| 2      | 3.880         | MM   | 0.0734      | 1095.20935   | 248.54048    | 97.2721 |
| 3      | 4.067         | MM   | 0.0508      | 13.62129     | 4.46536      | 1.2098  |

Totals : 1125.92388 257.40485

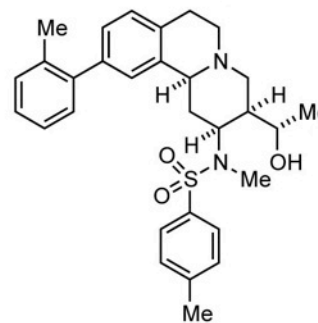

19{7,13}

Print of window 79: MS Spectrum  
Data File : L:\08-11\KANEDA\030811-KKII731-12645.D  
Sample Name : KKII73

=====  
Acq. Operator : kyosuke.kaneda@cm.utexas.edu  
Acq. Instrument : LCMS Location : Vial 2  
Injection Date : 8/3/2011 11:53:54 AM Inj : 1  
Inj Volume : 1.0 µl  
Acq. Method : C:\CHEM32\1\METHODS\SP\_NIH.M  
Last changed : 8/3/2011 11:53:33 AM by kyosuke.kaneda@cm.utexas.edu  
(modified after loading)  
Analysis Method : C:\CHEM32\1\METHODS\DEF\_LC.M  
Last changed : 11/20/2006 4:14:44 AM  
Sample Info : Easy-Access Method: 'SP\_NIH'

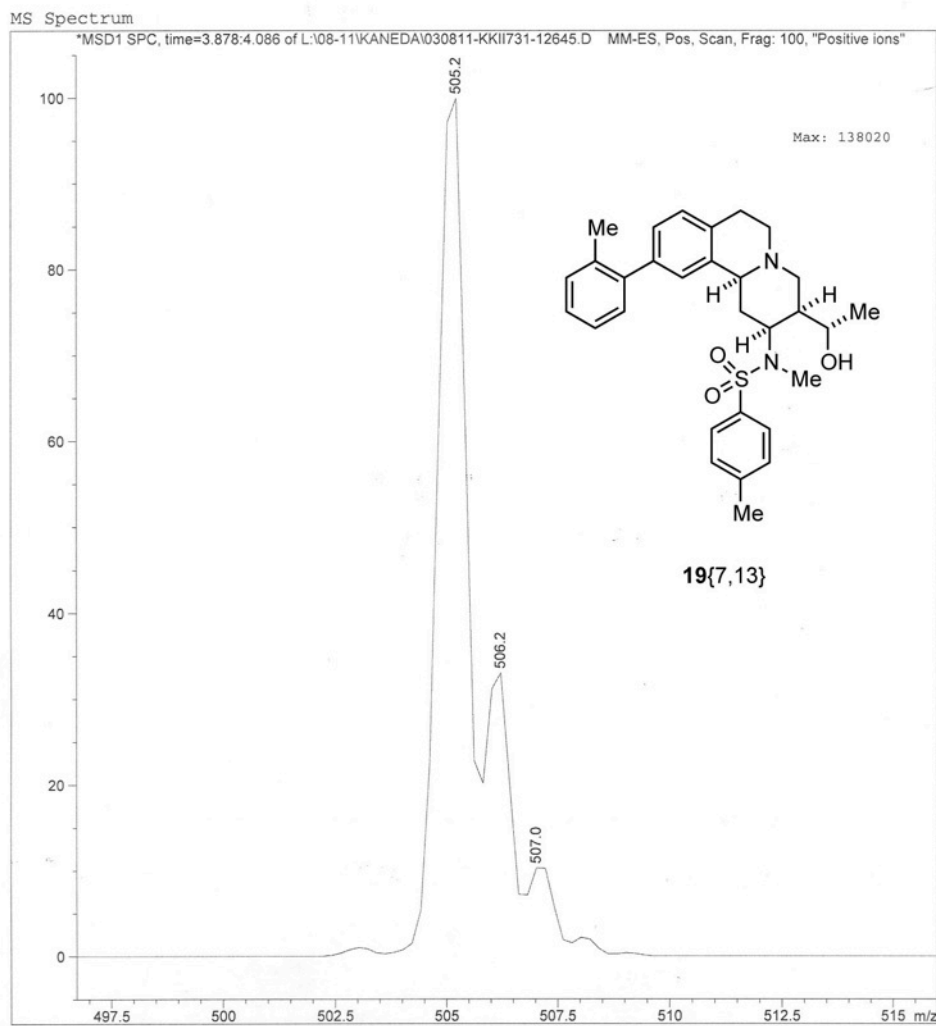

KKI142P2  
 Archive directory:  
 Sample directory:  
 Pulse Sequence: s2pu1  
 Solvent: cdcl3  
 Ambient temperature  
 File: KKI142P2\_s2pu1\_H1  
 INOVA-500 "Amastro"  
 Relax: delay 2.000 sec  
 Acq: time 4.000 sec  
 Width 6410.3 Hz  
 16 Repetitions 99.8047115 MHz  
 065KXPROG: s2pu1  
 Data name: KKI142P2  
 Line broadening 0.1 Hz  
 FT size 65536  
 Total time 1 min, 48 sec

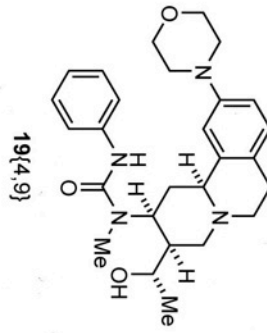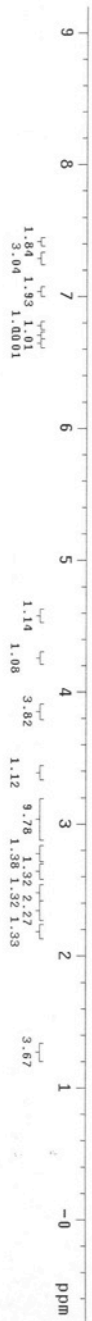



KKI142P2  
 Archive directory:  
 Sample directory:  
 Pulse Sequence: s2pul1  
 Solvent: CDCl3  
 Ambient temperature  
 User: 1-14-87  
 File: KKI142P2\_s2pul1\_C13  
 INOVA-500 "Hmpty"  
 Relax. delay 2.000 sec  
 Pulse 30.0 degrees  
 Acq. time 1.300 sec  
 Width 24599.8 Hz  
 Observed C13 100.5309747 MHz  
 DECOUPLE H1 399.8087105 MHz  
 Power 44 db  
 continuously on  
 continuously on  
 DATA PROCESSING  
 Line broadening 2.0 Hz  
 FT size 65536  
 Total time 1 hr., 50 min, 18 sec

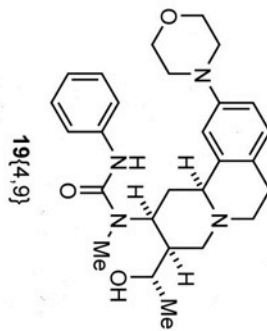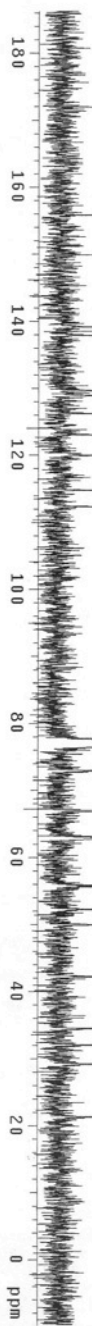

Data File L:\06-11\KANEDA\240611-KKI421-11642.D  
Sample Name: kkI42

=====  
Acq. Operator : kyosuke.kaneda@cm.utexas.edu  
Acq. Instrument : LCMS Location : Vial 54  
Injection Date : 6/24/2011 8:40:09 PM Inj Volume : 1.0 µl  
Acq. Method : C:\CHEM32\1\METHODS\SP\_NIH.M  
Last changed : 6/24/2011 8:39:55 PM by kyosuke.kaneda@cm.utexas.edu  
(modified after loading)  
Analysis Method : C:\CHEM32\1\METHODS\DEF\_LC.M  
Last changed : 11/20/2006 4:14:44 AM  
Sample Info : Easy-Access Method: 'SP\_NIH'

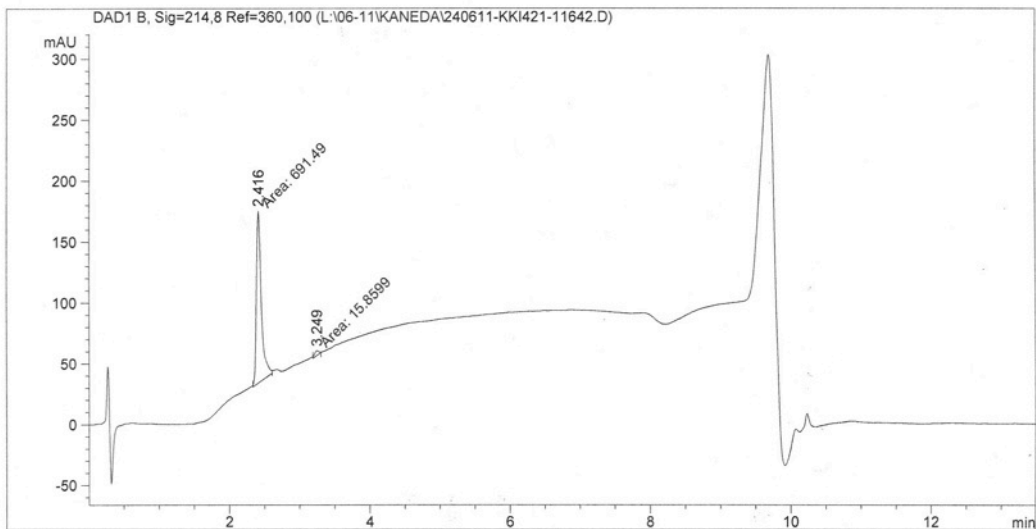

=====  
Area Percent Report  
=====

Sorted By : Signal  
Multiplier: : 1.0000  
Dilution: : 1.0000  
Use Multiplier & Dilution Factor with ISTDs

Signal 1: DAD1 B, Sig=214,8 Ref=360,100

| Peak # | RetTime [min] | Type | Width [min] | Area [mAU*s] | Height [mAU] | Area %  |
|--------|---------------|------|-------------|--------------|--------------|---------|
| 1      | 2.416         | MM   | 0.0814      | 691.48956    | 141.54823    | 97.7578 |
| 2      | 3.249         | MM   | 0.0661      | 15.85988     | 3.99740      | 2.2422  |

Totals : 707.34944 145.54563

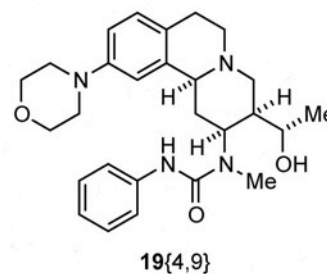

Print of window 79: MS Spectrum

Data File : L:\06-11\KANEDA\240611-KKI421-11642.D

Sample Name : kkI42

=====  
Acq. Operator : kyosuke.kaneda@cm.utexas.edu Location : Vial 54  
Acq. Instrument : LCMS Inj : 1  
Injection Date : 6/24/2011 8:40:09 PM Inj Volume : 1.0 µl

Acq. Method : C:\CHEM32\1\METHODS\SP\_NIH.M  
Last changed : 6/24/2011 8:39:55 PM by kyosuke.kaneda@cm.utexas.edu  
(modified after loading)  
Analysis Method : C:\CHEM32\1\METHODS\DEF\_LC.M  
Last changed : 11/20/2006 4:14:44 AM  
Sample Info : Easy-Access Method: 'SP\_NIH'

MS Spectrum

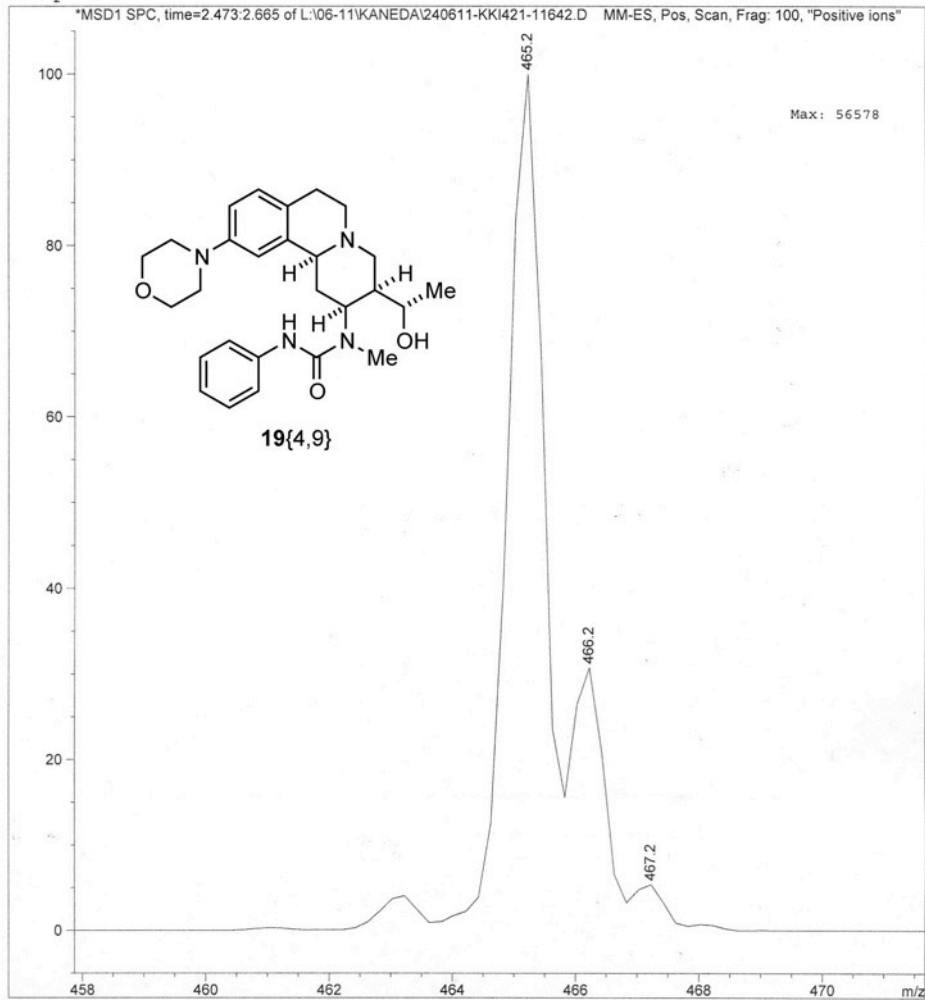

Instrument 1 6/27/2011 10:44:11 AM

Page 1 of 1

KK171  
 Archive directory:  
 Sample directory:  
 Pulse Sequence: s2pu1  
 Solvent: cdcl3  
 Ambient temperature  
 File: KK171\_s2pu1\_H1  
 INOVA-500 "mradstro"  
 Relax: delay 2.000 sec  
 Rpd: 30  
 Acq. time 4.000 sec  
 Width 6410.3 Hz  
 16 repetitions  
 0624K  
 DATA PROCESSING  
 Line broadening 0.1 Hz  
 FT size 65536  
 Total time 1 min, 48 sec

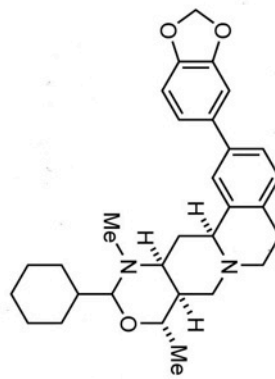

20(8,14)

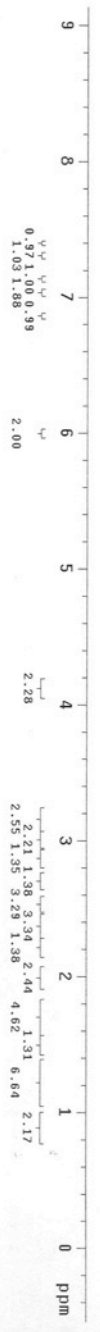

KK1171

Archive directory:

Sample directory:

Pulse Sequence: szpul

Solvent: cdcl3

Ambient temperature

User: 1-14-87

F1: KK1171\_s2pul\_C13

INVA-300

INSTR:

Relax. delay 2.000 sec

Pulse 30.0 degrees

Acq. time 1.300 sec

Width 24599.8 Hz

Observed C13 100.5309747 MHz

Decouple H1 399.8067105 MHz

Power 44 db

Continuously on

Acquisition

DATA PROCESSING

Line broadening 2.0 Hz

FT size 65536

Total time 55 min, 9 sec

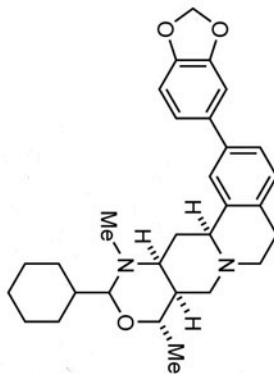

20{8,14}

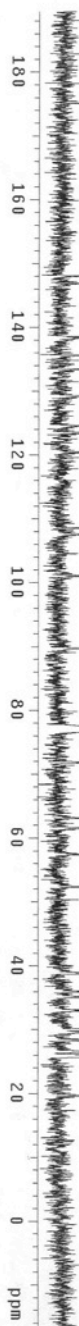

Data File L:\08-11\KANEDA\020811-KKII711-12623.D  
Sample Name: KKII71

=====  
Acq. Operator : kyosuke.kaneda@cm.utexas.edu  
Acq. Instrument : LCMS Location : Vial 45  
Injection Date : 8/2/2011 10:39:55 PM Inj Volume : 1.0 µl  
Acq. Method : C:\CHEM32\1\METHODS\SP\_NIH.M  
Last changed : 8/2/2011 10:39:40 PM by kyosuke.kaneda@cm.utexas.edu  
(modified after loading)  
Analysis Method : C:\CHEM32\1\METHODS\DEF\_LC.M  
Last changed : 11/20/2006 4:14:44 AM  
Sample Info : Easy-Access Method: 'SP\_NIH'  
=====

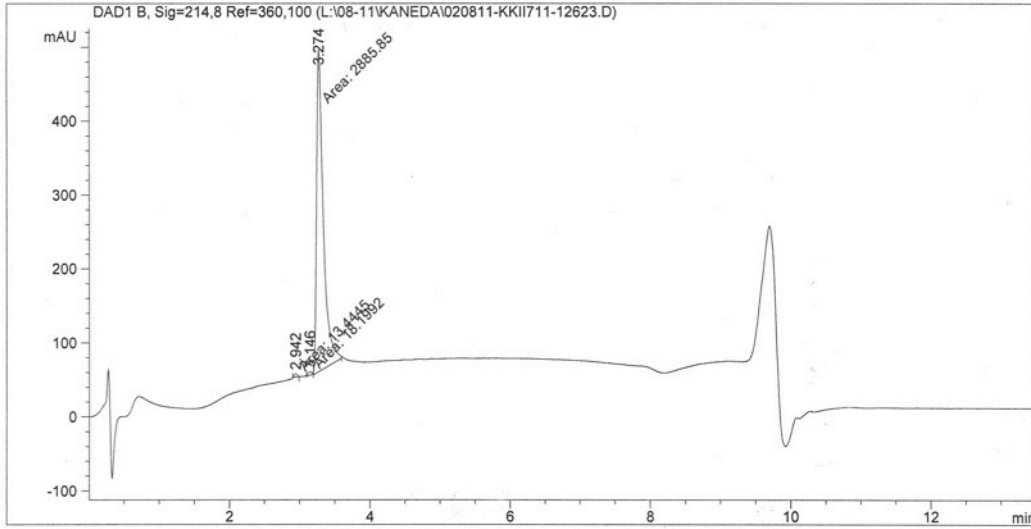

=====  
Area Percent Report  
=====

Sorted By : Signal  
Multiplier: : 1.0000  
Dilution: : 1.0000  
Use Multiplier & Dilution Factor with ISTDs

Signal 1: DAD1 B, Sig=214,8 Ref=360,100

| Peak # | RetTime [min] | Type | Width [min] | Area [mAU*s] | Height [mAU] | Area %  |
|--------|---------------|------|-------------|--------------|--------------|---------|
| 1      | 2.942         | MM   | 0.0501      | 13.44451     | 4.47037      | 0.4608  |
| 2      | 3.146         | MM   | 0.0614      | 18.19924     | 4.94061      | 0.6238  |
| 3      | 3.274         | MM   | 0.1099      | 2885.85205   | 437.74823    | 98.9154 |

Totals : 2917.49580 447.15921

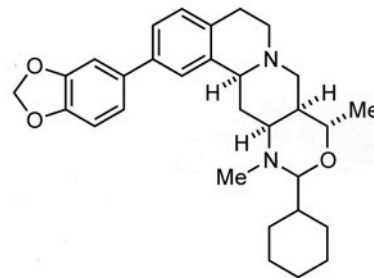

20{8,14}

Print of window 79: MS Spectrum

Data File : L:\08-11\KANEDA\020811-KKII711-12623.D

Sample Name : KKII71

=====  
Acq. Operator : kyoosuke.kaneda@cm.utexas.edu Location : Vial 45  
Acq. Instrument : LCMS Inj : 1  
Injection Date : 8/2/2011 10:39:55 PM Inj Volume : 1.0 µl

Acq. Method : C:\CHEM32\1\METHODS\SP\_NIH.M  
Last changed : 8/2/2011 10:39:40 PM by kyoosuke.kaneda@cm.utexas.edu  
(modified after loading)

Analysis Method : C:\CHEM32\1\METHODS\DEF\_LC.M  
Last changed : 11/20/2006 4:14:44 AM  
Sample Info : Easy-Access Method: 'SP\_NIH'

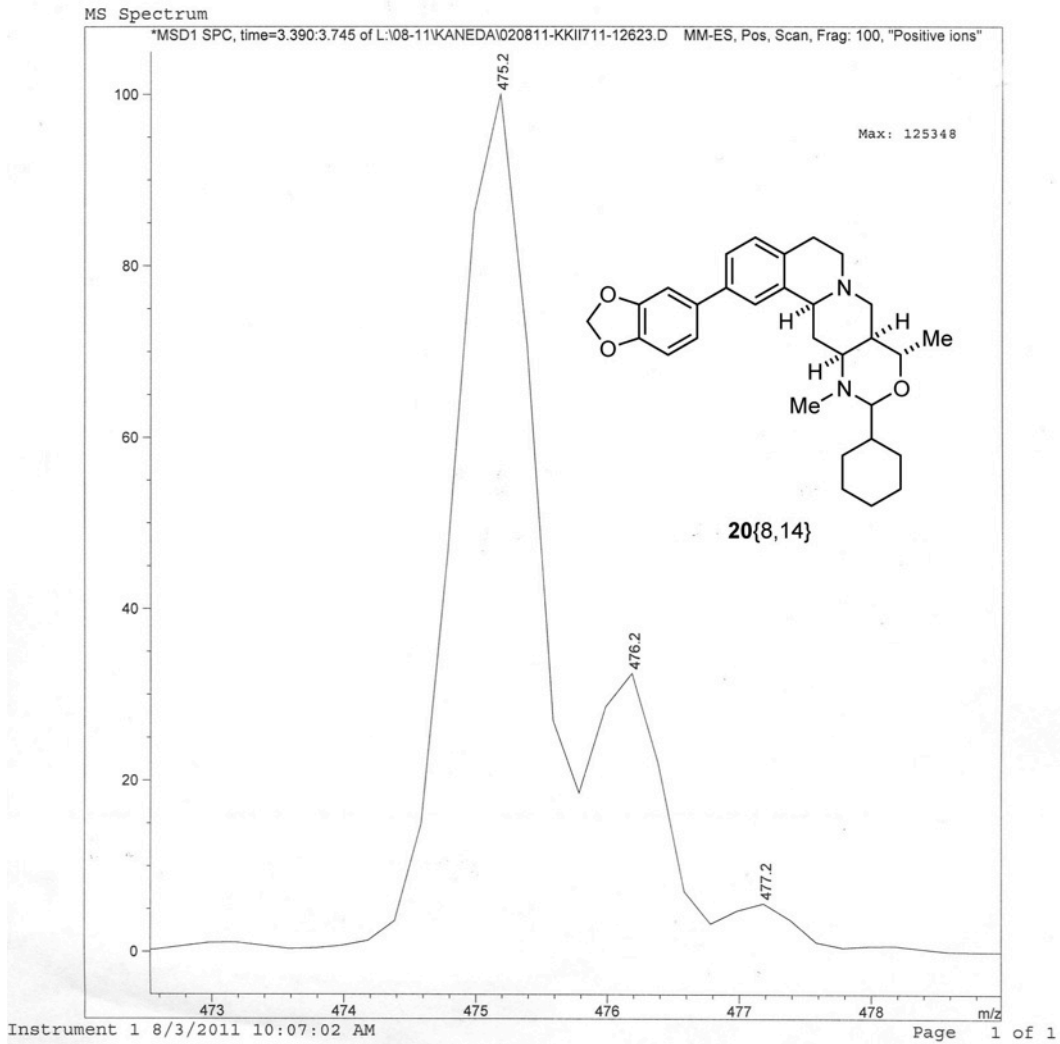

KK1175  
 Archive directory:  
 Sample directory:  
 Pulse Sequence: s2pu1  
 Solvent: CDCl3  
 Ambient temperature  
 File: KK1175\_s2pu1\_M1  
 INOVA-500 "nmr1roy"  
 Relax: delay: 2.000 sec  
 Relax: delay: 2.000 sec  
 Acq. time: 4.000 sec  
 Width: 6410.3 Hz  
 16 Repetitions  
 98.8007107 MHz  
 DATA PROCESSING  
 Line broadening: 0.1 Hz  
 FT size: 65536  
 Total time: 1 min, 48 sec

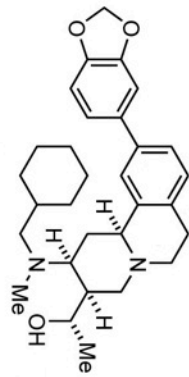

21(8,14)

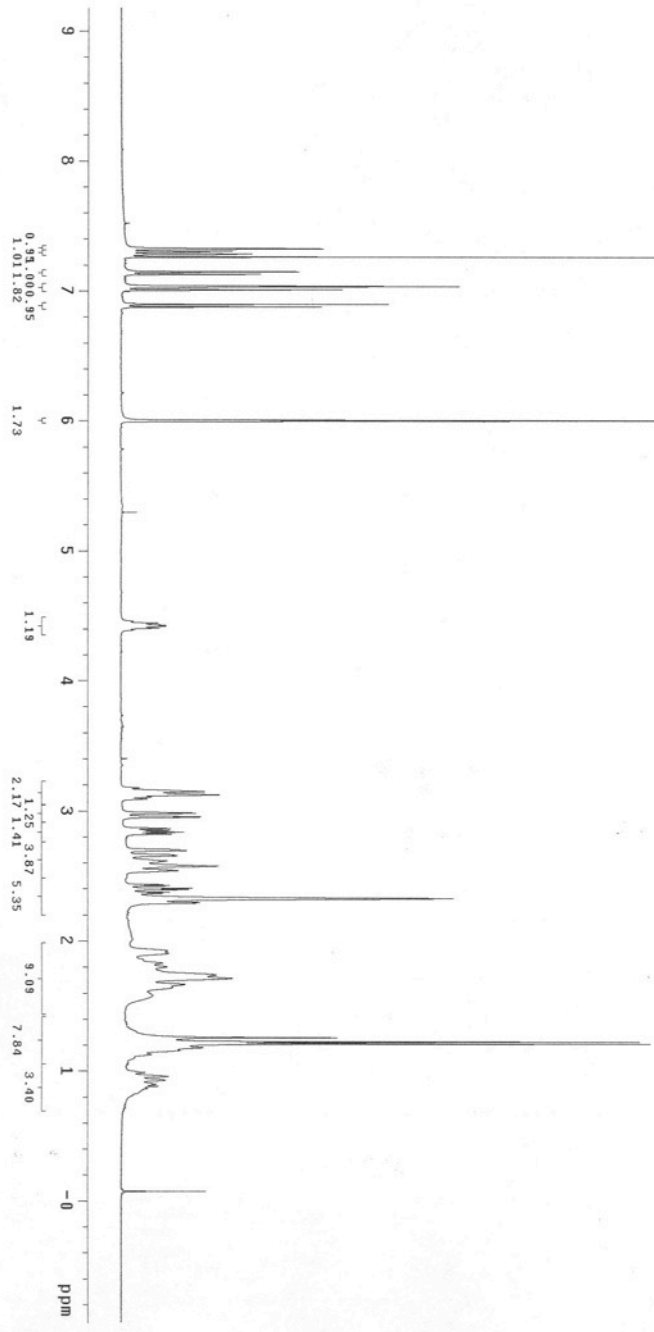



K1175  
 Archive directory:  
 Sample directory:  
 Pulse Sequence: s2pul1  
 Solvent: cdcl3  
 Ambient temperature  
 User: 1-14-87  
 Filter: K1175\_s2pul1\_C13  
 INOVA-500 "mmeitroy"  
 Relax: delay 2.000 sec  
 Pulse: 30.0 degrees  
 Acq. time 1.380 sec  
 Width 24509.8 Hz  
 1000 repetitions  
 5309747 MHz  
 DECOUPLE H1 399.8067105 MHz  
 Power 44 db  
 continuously on  
 All F2DCS stored  
 Data F2DCS stored  
 Line broadening 2.0 Hz  
 FT size 65536  
 Total time 55 min, 9 sec

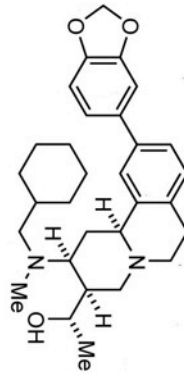

21{8, 14}

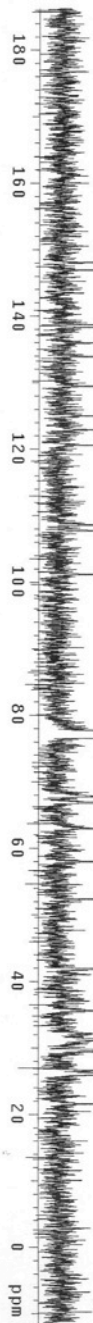

Data File L:\08-11\KANEDA\040811-KKII751-12701.D  
Sample Name: KKII75

=====  
Acq. Operator : kyosuke.kaneda@cm.utexas.edu  
Acq. Instrument : LCMS Location : Vial 58  
Injection Date : 8/4/2011 4:06:05 PM Inj Volume : 1.0 µl  
Acq. Method : C:\CHEM32\1\METHODS\SP\_NIH.M  
Last changed : 8/4/2011 4:05:51 PM by kyosuke.kaneda@cm.utexas.edu  
(modified after loading)  
Analysis Method : C:\CHEM32\1\METHODS\DEF\_LC.M  
Last changed : 11/20/2006 4:14:44 AM  
Sample Info : Easy-Access Method: 'SP\_NIH'

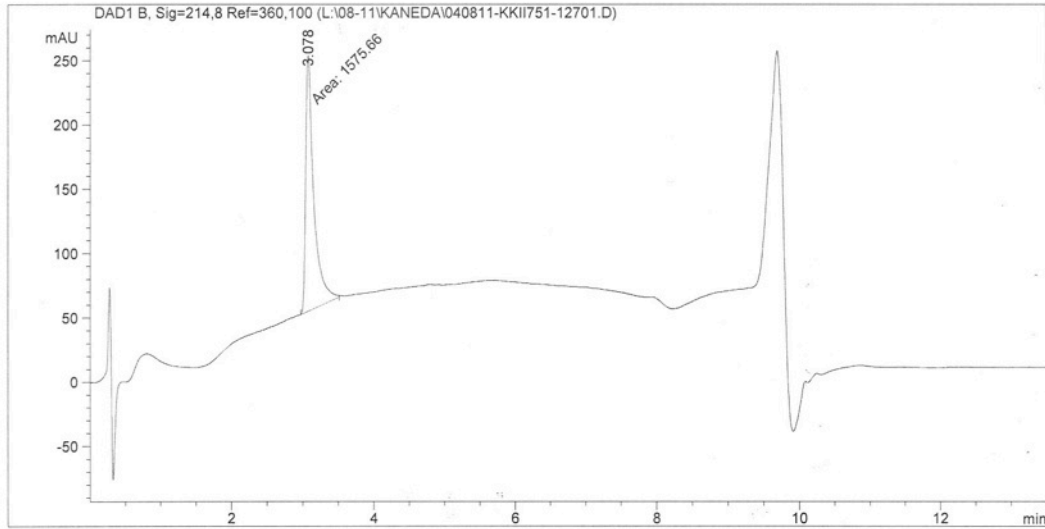

=====  
Area Percent Report  
=====

Sorted By : Signal  
Multiplier: : 1.0000  
Dilution: : 1.0000  
Use Multiplier & Dilution Factor with ISTDs

Signal 1: DAD1 B, Sig=214,8 Ref=360,100

| Peak # | RetTime [min] | Type | Width [min] | Area [mAU*s] | Height [mAU] | Area %   |
|--------|---------------|------|-------------|--------------|--------------|----------|
| 1      | 3.078         | MM   | 0.1315      | 1575.65979   | 199.70491    | 100.0000 |

Totals : 1575.65979 199.70491

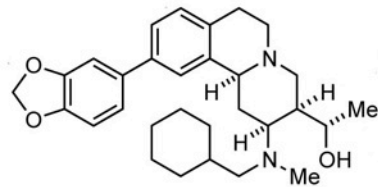

21{8,14}

Print of window 79: MS Spectrum  
Data File : L:\08-11\KANEDA\040811-KKII751-12701.D  
Sample Name : KKII75

=====  
Acq. Operator : kyosuke.kaneda@cm.utexas.edu  
Acq. Instrument : LCMS Location : Vial 58  
Injection Date : 8/4/2011 4:06:05 PM Inj : 1  
Inj Volume : 1.0 µl  
  
Acq. Method : C:\CHEM32\1\METHODS\SP\_NIH.M  
Last changed : 8/4/2011 4:05:51 PM by kyosuke.kaneda@cm.utexas.edu  
(modified after loading)  
Analysis Method : C:\CHEM32\1\METHODS\DEF\_LC.M  
Last changed : 11/20/2006 4:14:44 AM  
Sample Info : Easy-Access Method: 'SP\_NIH'

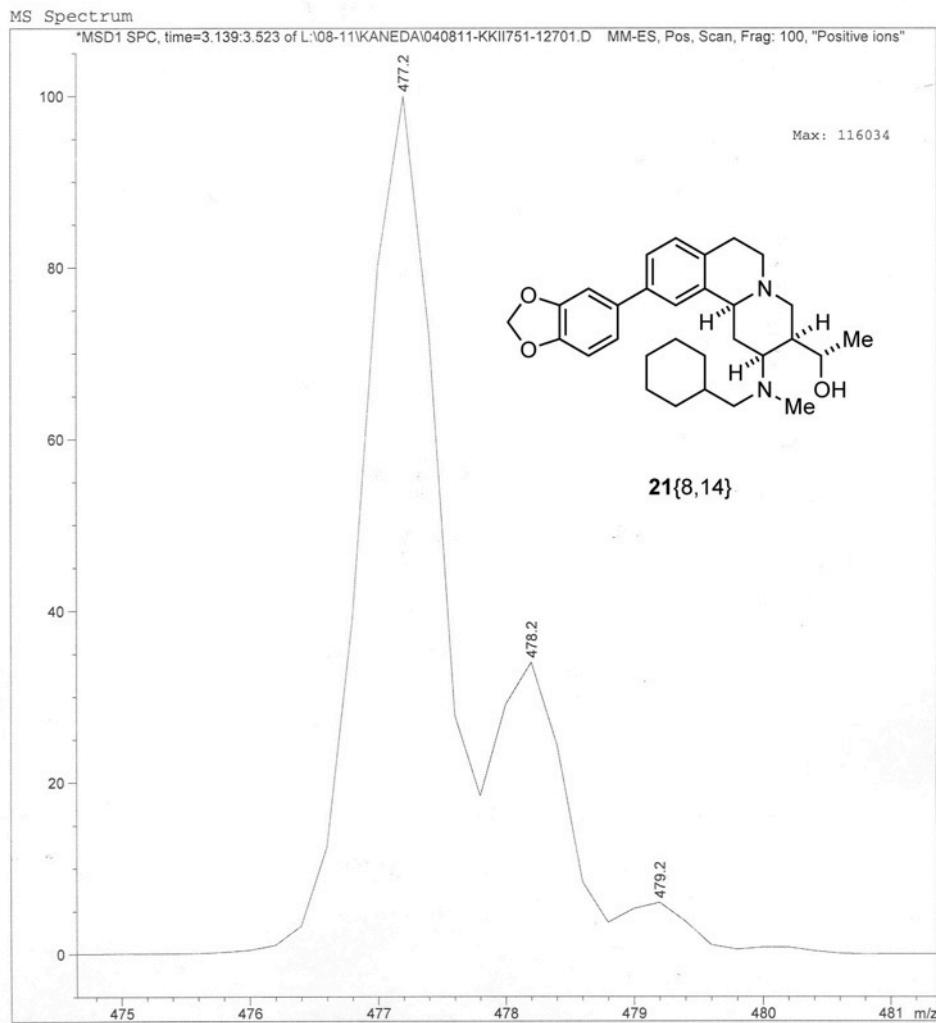

## REFERENCES

---

- 1) Still, W. C.; Kahn, M.; Mitra, A. Rapid Chromatographic Technique for Preparative Separations with Moderate Resolution. *J. Org. Chem.* **1978**, *43*, 2923-2925.
- 2) Jung, M. E.; Blum, R. B. Generation of the Enolate of Acetaldehyde from Non-carbonyl Substances and its C-Alkylation, O-Acylation, and O-Silylation. *Tetrahedron Lett.* **1977**, *18*, 3791-3794.
- 3) For the crystallographic information file of compound **10**, see: Granger, B. A.; Kaneda, K.; Martin, S. F. Multicomponent Assembly Strategies for the Synthesis of Diverse Tetrahydroisoquinoline Scaffolds. *Org. Lett.* **2011**, *13*, 4542-4545.
